1 **Emerging single cell endothelial heterogeneity supports**  
2 **sprouting tumour angiogenesis and growth**

3

4 Ken Matsumoto<sup>1,2</sup>, Florian Rambow<sup>3,4</sup>, Fabio Stanchi<sup>1,2</sup>, Thomas Mathivet<sup>5</sup>, Junbin  
5 Qian<sup>6,7</sup>, Wolfgang Giese<sup>8</sup>, Liquan He<sup>9</sup>, Diether Lambrechts<sup>6,7</sup>, Bin Zhou<sup>10</sup>, Christer  
6 Betsholtz<sup>9,11</sup>, Jean-Christophe Marine<sup>3,4</sup>, Holger Gerhardt<sup>1, 2, 8, 12, 13 \*</sup>

7

8 <sup>1</sup>Vascular Patterning laboratory, VIB Center for Cancer Biology, Leuven, Belgium

9 <sup>2</sup>Vascular Patterning laboratory, Department of Oncology, KU Leuven, Leuven, Belgium

10 <sup>3</sup>Laboratory for Molecular Cancer Biology, VIB Center for Cancer Biology, Leuven,  
11 Belgium

12 <sup>4</sup>Laboratory for Molecular Cancer Biology, Department of Oncology, KU Leuven,  
13 Leuven, Belgium

14 <sup>5</sup>Laboratoire de Neurosciences Expérimentales et Cliniques, Université de Poitiers,  
15 INSERM U1084, Poitiers, France

16 <sup>6</sup>Laboratory of Translational Genetics, VIB Center for Cancer Biology, Leuven, Belgium

17 <sup>7</sup>Laboratory of Translational Genetics, Center for Human Genetics, KU Leuven, Leuven,  
18 Belgium

19 <sup>8</sup>Integrative Vascular Biology, Max-Delbrück Center for Molecular Medicine, 13125  
20 Berlin, Germany

21 <sup>9</sup>Department of Immunology, Genetics and Pathology, Rudbeck Laboratory, Uppsala  
22 University, Uppsala, Sweden

23 <sup>10</sup>State key Laboratory of Cell Biology, CAS center for Excellence in Molecular Cell  
24 Science, Institute of Biochemistry and Cell Biology, Shanghai Institutes for Biological  
25 Sciences, University of Chinese Academy of Sciences, Chinese Academic of Sciences,

26 Shanghai 200031, China.

27 <sup>11</sup>Integrated Cardio Metabolic Centre (ICMC), Karolinska Institute, Huddinge, Sweden

28 <sup>12</sup>DZHK (German Center for Cardiovascular Research) Partner site Berlin

29 <sup>13</sup>Berlin Institute of Health (BIH), Berlin, Germany

30 \*Correspondence: H. Gerhardt, email: [holger.gerhardt@mdc-berlin.de](mailto:holger.gerhardt@mdc-berlin.de)

31

32 Keywords: *Csf1r*, lineage tracing, tumour angiogenesis, intravital imaging, single cell  
33 transcriptional profiling

34 Conflict of Interest: The authors have declared that no conflict of interest exists.

35

36

## 37 **SUMMARY**

38 Blood vessels supplying tumors are often dysfunctional and generally heterogeneous. The  
39 mechanisms underlying this heterogeneity remain poorly understood. Here, using  
40 multicolor lineage tracing, *in vivo* time-lapse imaging and single cell RNA sequencing in  
41 a mouse glioma model, we identify tumour-specific blood endothelial cells that originate  
42 from cells expressing the receptor for colony stimulating factor 1, *Csf1r*, a cytokine which  
43 controls macrophage biology. These *Csf1r* lineage endothelial cells (CLECs) form up to  
44 10% of the tumour vasculature and express, besides classical blood endothelial cell  
45 markers, a gene signature that is distinct from brain endothelium but shares similarities  
46 with lymphatic endothelial cell populations. *in silico* analysis of pan-cancer single cell  
47 RNAseq datasets highlights the presence of a comparable subpopulation in the  
48 endothelium of a wide spectrum of human tumours. We show that CLECs actively  
49 contribute to sprouting and remodeling of tumour blood vessels and that selective  
50 depletion of CLECs reduces vascular branching and tumour growth. Our findings indicate

51 that a non-tumour resident Csf1r-positive population is recruited to tumours,  
52 differentiates into blood endothelial cells to contribute to vascularization and, thereby,  
53 tumour growth.

54

55

## 56 **INTRODUCTION**

57 Endothelial cells form a single cell layer lining the inner walls of blood vessels and play  
58 critical roles in organ homeostasis and disease progression. Once formed, following  
59 embryonic and early post-natal development, blood vessels retain a high level of  
60 adaptability to meet changing metabolic or hemodynamic requirements or enable further  
61 tissue growth including in tumours. How local vascular networks respond to these  
62 adaptive challenges, rapidly expand, remodel and reestablish homeostasis remains a  
63 timely research topic, with many open questions still unresolved. In particular in  
64 pathologies, knowledge of the precise nature and origin of new vessel formation,  
65 endothelial activation and differentiation steps, and of the mechanisms driving vessel  
66 dysmorphia, or preventing effective revascularization in ischemic diabetic complication  
67 is critical for new therapeutic approaches. New blood vessel formation in the adult was  
68 long believed to arise exclusively by sprouting and proliferation of endothelial cells from  
69 local blood vessels without any de novo differentiation from progenitor cells. However,  
70 Asahara and coworkers isolated mononuclear cells from human peripheral blood and  
71 identified circulating endothelial progenitor cells (EPCs) <sup>1</sup>. These cells were shown to  
72 derive from the bone marrow and contribute to endothelial cells in blood vessels in  
73 hindlimb ischemia and tumour xenograft mouse model <sup>2,3</sup>. By fluorescent in situ  
74 hybridization with sex chromosome-specific probes in patients with cancer after bone  
75 marrow transplantation, Peters and coworkers demonstrated that bone marrow-derived

76 stem cells contribute to endothelial cells in human tumour endothelium <sup>4</sup>. The resulting  
77 concept of vasculogenesis in the adult raised the prospect of novel therapeutic approaches  
78 for ischemic vascular disease and for targeting tumour angiogenesis <sup>5,6</sup>. Interestingly,  
79 EPCs also contributed to newly forming lymphatic vessels <sup>7,8</sup>. A vast number of  
80 publications since have supported or challenged these initial discoveries, and the  
81 occurrence, origin and significance of EPCs continues to be a matter of debate <sup>9-12</sup>.  
82 Whereas EPCs and other circulating progenitor cells were long thought to origin from the  
83 bone marrow, recent studies challenged this idea and suggested the existence of a  
84 different yet unknown vascular niche for endothelial progenitor cells that can contribute  
85 to blood vessel formation<sup>13</sup>.

86

## 87 **RESULTS**

88 *A **Csf1r** cell lineage contributes to blood vascular endothelial cells during glioma*  
89 *growth in mice.*

90 In order to study dynamic macrophage recruitment and blood vessel patterning *in vivo*  
91 during glioma growth, we adapted a surgical cranial window model for two-photon  
92 microscopy allowing repeated visualization of the same animal over time. We generated  
93 spheroids of syngeneic C57BL/6 mouse glioma cells (CT2A or GL261) <sup>14,15</sup> modified to  
94 stably express blue fluorescent protein (BFP), and injected them into the mouse cortex,  
95 followed by implantation of a glass coverslip <sup>16</sup>. By crossing transgenic *Csf1r* (*Colony*  
96 *stimulating factor 1 receptor*)– specific tamoxifen-inducible Cre driver mice <sup>17</sup> with the  
97 *mTmG* Cre reporter mouse line <sup>18</sup>, we induced membrane-targeted GFP expression in  
98 *Csf1r*-expressing cells and used this stable lineage trace to follow the cell population over  
99 time (Fig. 1a, b). As expected, the vast majority of tumour associated macrophages were  
100 labelled by GFP in line with their *Csf1r*-dependent recruitment and expansion<sup>19</sup>.

101 Unexpectedly, however, through the combination of longitudinal live two-photon  
102 imaging and lineage tracing, we discovered GFP-positive cells contributing to the tumour  
103 vasculature during glioma growth (Fig. 1c). These *Csf1r* lineage endothelial cells  
104 (CLECs) frequently emerged at tip cell positions of the growing vasculature, heading  
105 blood vessel sprouts in the mouse glioma (Fig. 1d, Supplementary Movie1). Additionally,  
106 CLECs were found bridging adjacent capillaries during anastomosis (Fig. 1e).  
107 Fluorescent dextran injection confirmed that CLECs contributed to - and were  
108 incorporated in the endothelial lining of - functionally perfused blood vessels including  
109 lumenized sprouts headed by endothelial tip cells (Fig. 1f). Counterstaining on fixed  
110 samples identified that all cells forming blood vessels including the lineage-traced CLECs  
111 expressed typical endothelial markers (CDH5, CD31) and lacked macrophage and  
112 myeloid cell markers (F4/80, CD45) (Fig. 1g, h, Extended Data Fig. 1). BFP was not  
113 expressed in CLECs, demonstrating that they were not derived from glioma cells (Fig.  
114 1g).

115 To gain more insight into the nature and significance of CLECs, we isolated and  
116 quantified the cell population in the mouse glioma model. By 4 weeks of tumour  
117 development (close to the specified humane endpoint of 5 weeks) up to 10% of the tumour  
118 vasculature was comprised of cells carrying the *Csf1r* lineage trace. Similar frequencies  
119 were found in tumours derived from either of the mouse glioma cell lines, CT2A (Fig. 2a,  
120 b), or GL261 (Fig. 2c). Polyclonal antibody staining indicated that *Csf1r* may also be  
121 expressed in some brain capillary endothelial cells<sup>20,21</sup>. Recent single cell sequencing of  
122 adult mouse brain endothelial cells however did not confirm this notion<sup>22</sup>, suggesting that  
123 CLECs are unlikely to originate from brain endothelium. Indeed, tamoxifen mediated  
124 activation of our transgenic *Csf1r* lineage trace did not label brain endothelial cells in  
125 mice lacking tumours, sham operated as well as in the healthy brain parenchyma

126 surrounding implanted tumours (Fig. 2d, e, f). *Csf1r* is important for the embryonic  
127 development of microglia and its expression is also detected in adult microglia by single  
128 cell RNA sequencing. Surprisingly however, *Csf1r*-Mer-iCre-Mer mediated  
129 recombination of the Cre-Reporter expression was also not observed in microglia of the  
130 healthy adult mouse brain. Irrespective of this apparent discrepancy between reported  
131 microglial *Csf1r* expression and the lack of *Csf1r*-Mer-iCre-Mer mediated recombination  
132 in microglia, these data also exclude microglia as a potential source of CLECs.  
133 Furthermore, we observed CLECs also in tumours originating from B16F1 melanoma  
134 cells implanted under the skin; thus, this *Csf1r*-lineage endothelial cell contribution not  
135 only occurs in brain tumours with microglia in their environment, but also in other tumour  
136 types and locations (Fig. 2g, h). Notably, we also found *Csf1r*-lineage lymphatic  
137 endothelial cells in B16F1 skin melanomas indicating that CLECs can contribute to both  
138 blood and lymphatic vessels (Extended Data Fig. 2).

139 ***CLECs do not originate from hematopoietic niche in bone-marrow or spleen.***

140 Given the abundant labelling of macrophages and the important role of *Csf1r* in the  
141 recruitment of bone-marrow derived monocytes and differentiated macrophages, we  
142 asked whether CLECs are also derived from the bone-marrow. To test this possibility, we  
143 generated bone marrow chimeras. Flow cytometric analysis confirmed  $97.3 \pm 1.6$  %  
144 reconstitution of wild-type recipient bone marrow by transplanted *Csf1r*-Mer2.Cre<sup>mTmG</sup>  
145 bone marrow after 8 weeks post transplantation (Extended Data Fig. 3). Analysis of  
146 glioma blood vessels in these bone marrow chimeras (BM<sup>*Csf1r*-Mer2.Cre-mTmG</sup>) failed to  
147 identify bone marrow derived CLECs, although the numbers of tumour macrophage were  
148 similar to controls (Fig. 3a). Conversely, chimeras of wild-type donor bone marrow  
149 transplanted into *Csf1r*-Mer2.Cre<sup>mTmG</sup> recipients (*Csf1r*-Mer2.Cre<sup>mTmG</sup>::BM<sup>WT</sup>),  
150 displayed similar CLECs numbers in glioma vessels as observed earlier in non-chimeric

151 *Csf1r-Mer2.Cre<sup>mTmG</sup>* mice (Fig. 3b). These results were confirmed by intravital imaging  
152 in the glioma of *Csf1r-Mer2.Cre<sup>mTmG</sup>::BM<sup>WT</sup>* (Fig. 3c, Supplemental Movie 2). Thus, the  
153 bone marrow chimera and lineage tracing experiments strongly suggest that CLECs do  
154 not originate from bone marrow-derived cells, nor do they represent previously suggested  
155 transdifferentiation events from bone marrow-derived macrophages. Surgical removal of  
156 the spleen also did not affect CLECs numbers, further ruling out spleen-derived  
157 macrophages as source of CLECs (Extended Data Fig. 4).

158 ***CLECs regulate vascular patterning and support glioma growth.***

159 In late-stage gliomas, CLECs preferentially localized to the peripheral tumor area,  
160 correlating with the zone of most active angiogenesis (Extended Data Fig. 5). Real-time  
161 intravital imaging of mouse gliomas also revealed that CLECs incorporation into vessels  
162 is very dynamic. This implied that CLECs might have unique and potentially transient  
163 functions during tumour vessel formation. To gain a better understanding of CLECs  
164 behaviour during tumour growth, we developed dual-recombination combinatorial  
165 genetics as a tool for CLECs tracing<sup>23,24</sup>. To achieve selective recombination in CLECs,  
166 we used the *Cdh5* endothelial driver for expression of the Dre recombinase, and the same  
167 transgenic mouse line as above expressing the tamoxifen inducible form of the Cre  
168 recombinase under control of the *Csf1r* transgene. The combined action of these distinct  
169 recombinases, Dre and Cre, allowed for deletion of two stop cassettes flanked by RoxP  
170 and LoxP sites, respectively, located upstream of a tdTomato expression cassette (Fig.  
171 4a). Using this strategy, we could selectively trace tdTomato-positive CLECs in mouse  
172 gliomas following tamoxifen exposure (Fig. 4b). Note that the appearance of labelled  
173 CLECs and blood vessel labelling differs from the images of the mTmG line, as the dual  
174 Dre/Cre tdTomato reporter used lacks a general label of unrecombined cells. Fluorescent  
175 dextran injection instead was used to label vascular lumen, highlighting dtTomato

176 positive CLECs that line the vessel lumen. As expected, counterstaining on fixed samples  
177 demonstrated that CLECs express the prototypical endothelial marker, ERG (ETS-related  
178 gene) (Fig. 4c). In order to assess whether CLECs contribute functionally to tumour  
179 growth and vascular patterning in glioma, we used the same dual recombination strategy  
180 to selectively ablate CLECs (Fig. 4d). In this model, CLECs expressed both GFP as well  
181 as the diphtheria toxin receptor after tamoxifen induction enabling depletion of GFP-  
182 positive CLECs by administration of diphtheria toxin (Fig. 4e, h). Strikingly, CLECs  
183 ablation significantly decreased glioma growth (Fig. 4g, i). CLECs ablation also  
184 decreased the vascular network length and the number of bifurcations in tumour vessels  
185 (Fig. 4j, k, l), indicating that CLECs may promote tumour growth by supporting vessel  
186 branching.

#### 187 ***CLECs express a unique set of markers***

188 To further understand the nature of tumour CLECs (T\_CLECs), we performed single-cell  
189 RNA sequencing (scRNA-seq) on isolated T\_CLECs in the mouse glioma model. Single-  
190 cell transcriptome analysis using Smart-seq2<sup>25</sup> identified that the gene expression pattern  
191 of T\_CLECs was similar to lineage-negative tumour endothelial cells (T\_EC), but not  
192 to tumour macrophages (T\_MAC), as determined by UMAP (Uniform Manifold  
193 Approximation and Projection) analysis (Fig. 5a). Single-cell differential expression  
194 (SCDE) analysis<sup>26</sup> confirmed that T\_CLECs expressed typical endothelial markers, but  
195 lacked macrophage and myeloid cell markers (Fig. 5b). Unexpectedly, however,  
196 T\_CLECs showed no *Csf1r* expression, despite carrying the *Csf1r*-lineage marker (Fig.  
197 5c). Beyond the overlapping gene expression pattern between T\_CLECs and T\_EC,  
198 SCDE analysis identified a unique signature that can distinctly define the T\_CLECs  
199 population; RNAs coding for 24 genes including three types of cell surface proteins  
200 (*Aqp1*: Aquaporin 1, *Fabp4*: Fatty acid binding protein 4, *Kcnj8*: Potassium voltage-



201 *gated channel subfamily j member 8*) were significantly enriched in T\_CLECs (Fig. 5d;  
202 Extended Data Fig. 6; Supplementary Table 1). *Aqp1* is highly expressed in vascular  
203 endothelial cells and was reported to contribute to tumour growth and angiogenesis <sup>27</sup>.  
204 Staining of lineage traced T\_CLECs on fixed mouse glioma samples confirmed AQP1  
205 expression (Extended Data Fig. 7).

### 206 ***The T\_CLEC state is enriched for “Tip-like” and a lymphatic gene signature***

207 Gene set enrichment analysis (GSEA) identified that the T\_CLEC state shows significant  
208 enrichment for a Tip-cell-like associated gene expression program (Fig. 5e), thus  
209 supporting the morphological observations and their functional importance for branching  
210 and tumour growth. Intriguingly, GSEA identified that T\_CLECs were also enriched for  
211 lymphatic gene signatures (Fig. 5e). AUCell analysis <sup>28</sup> of scRNA-seq data from multiple  
212 human primary tumours identified subpopulations of endothelial cells that express the  
213 T\_CLECs marker gene set (Fig. 5f-k, 442 out of 7314 ECs are candidates: 6.0%;  
214 Supplementary Table 2). These *bona-fide* T\_CLECs were highly enriched in tip cell,  
215 neophalanx cell, lymphatic endothelial cell subpopulations and particularly abundant in  
216 human pancreatic cancer (Fig. 5k). Neophalanx endothelial cells, which express two pro-  
217 angiogenesis markers, *Glul* (*Glutamine synthetase*) and *Cxcl12* (*C-X-C motif chemokine*  
218 *ligand 12*) <sup>29,30</sup> have recently been identified in lung tumour-associated endothelial cell  
219 studies <sup>31,32</sup>, and were proposed to line neo-vessels after termination of vessel sprouting.  
220 Together this data suggests that based on the transcriptional state, T\_CLECs might have  
221 a supportive role in tumor vessel sprouting and remodeling. Detailed comparison with  
222 recent single cell RNA seq data on tumour endothelial cells in mouse and human tumours  
223 <sup>31</sup> confirmed the Tip-like gene signature of T\_CLECs, but also identified significant  
224 similarities with lymphatics (Fig. 5k). The latter is particularly surprising given that our

225 perfusion experiments with dextran clearly demonstrated that T\_CLECs in the glioma  
226 model line blood vessels, not lymphatics.

### 227 *Acute recombination identifies a CLEC lineage in lymph nodes*

228 The transcriptional similarities between T\_CLECs and lymphatic endothelial cells are  
229 noteworthy as blood endothelial cells, in particular in the brain environment, and  
230 lymphatic EC represent highly differentiated cell types. During vertebrate embryogenesis,  
231 lymphovenous specification sees common progenitor cells diverge in their differentiation  
232 to establish mature blood endothelium and lymphatic endothelium<sup>33</sup>. The apparent  
233 similarities could therefore suggest that T\_CLECs represent an immature endothelial cell  
234 state with partially overlapping profiles of both immature blood and lymphatic cells. In  
235 this case, the expression of lymphatic genes would signify a return to an earlier cell state  
236 or potentially some level of transdifferentiation between the two endothelial cell states.

237 The latter would imply a distant source of lymphatic endothelium as possible origin of  
238 CLECs. Indeed, when searching for CLECs in all organs, we observed selective  
239 endothelial labelling in lymph nodes, notably restricted to the periphery where specialized  
240 lymphatic endothelial cells form the floor of the subcapsular sinus (SCS, Fig. 6a). Bone-  
241 marrow transplantation to eliminate the abundant Csf1r-lineage macrophage population  
242 highlighted the specific labelling of CLECs in lymph nodes (Fig. 6b).

243 To gain more insight into the emergence of T\_CLECs, we asked whether acute  
244 recombination could indicate their possible origin. Acute induction experiments (24h  
245 after single tamoxifen injection) illustrated that the Csf1r-expressing progenitors of this  
246 tumour endothelial cell population do not reside locally in pre-existing brain or the  
247 associated brain tumour vasculature (Extended Fig. 8). Close inspection however  
248 revealed GFP-positive endothelial cells with significant labelling 24h post-injection in  
249 the floor endothelial cells of the SCS of lymph nodes (Fig. 6c). The mTmG Cre-reporter

250 switches from red fluorescent protein expression to mEGFP expression upon  
251 recombination. Therefore, cells that acutely recombine, carry both GFP and Tomato  
252 expression until the latter is fully degraded. Strikingly, floor SCS endothelial cells  
253 exhibited both GFP and simultaneous Tomato expression, demonstrating recent  
254 recombination. FACS analysis confirmed the presence of double positive EC in lymph  
255 nodes, but not in brain or brain tumours. In fact, double positive cells for GFP and Tomato  
256 were not observed in the brain tumours at any stage, excluding the possibility of any acute  
257 or continuous local recombination of T\_CLECs within the tumour microenvironment.  
258 Prox-1 staining confirmed the lymphatic nature of CLECs in the lymphnode, and  
259 demonstrated that only a subpopulation of lymphatic endothelial cells in the lymph node  
260 carry the *Csfr1*-lineage trace, the cells in the floor of the SCS (Fig. 6d).

261 We decided to perform scRNA seq also on endothelial cells isolated from lymph nodes,  
262 assess gene expression and perform pseudotime analysis to understand differentiation of  
263 T\_CLECs, T\_EC, LN\_CLECs (GFP positive) and LN\_EC (GFP negative) (Fig. 7a-f).  
264 We used the same Smart-seq2 platform for comparison to sequence another 384 cells of  
265 lymph node origin. After quality control (Fig. 7a), 89 cells EC, not *Csfr1* lineage EC, and  
266 104 cells expressing GFP (Fig. 7b) in the lymph nodes were selected for further analysis.  
267 Comparative analysis with recent mouse lymph node scRNA data<sup>34</sup> confirmed that the  
268 LN\_CLEC co-register with identified SCS floor cells (Extended Data Fig. 9a).

269 Unlike T\_CLECs, LN\_CLECs also expressed *Csf1r*, in line with our finding of acute  
270 recombination in the SCS floor cells.

271 UMAP based dimension reduction placed T\_CLECs and T\_EC closely together, as before,  
272 and also LN\_CLEC and LN\_EC co-cluster, although two additional distinct LN\_EC  
273 clusters appear highly distinct and thus unrelated to any of the other cell types (Fig. 7c).  
274 Interestingly, some T\_CLEC cluster with the LN\_CLEC, suggesting that there is at least

275 some overlap in gene expression between the Csf1r lineage cells in the brain tumour and  
276 in the lymph nodes. Looking at relative expression levels of all genes in a heatmap  
277 comparing the lineage positive and negative EC from lymph nodes and tumours  
278 highlighted that differential expression is more prevalent than any overlap between  
279 tumour EC and LN EC (Fig. 7d). However, there are small number of genes like Pde4d,  
280 Robo1 and Itga9 that show higher expression in the two lineage positive populations in  
281 LN and tumour, compared to the lineage negative cells (Extended Data Fig. 9b). Itga9 is  
282 well known to be important in lymphatic development<sup>35</sup>, confirming again that T\_CLECs  
283 carry some gene expression patterns normally associated with lymphatic EC.  
284 Nevertheless, despite the fact that only LN\_CLEC appear to acutely recombine,  
285 differential gene expression analysis does not provide clear evidence for a lineage  
286 relationship between LN\_CLEC and T\_CLEC.

287

### 288 ***T\_EC and T\_CLECs “co-evolve” during tumour growth, suggesting distinct origin***

289 To gain more insight into the differentiation state and possible route of differentiation,  
290 we next performed pseudotemporal ordering using Monocle<sup>36</sup> (Fig. 7f). The Monocle  
291 inferred trajectory suggested equally distributed pseudotime values for T\_CLECs and  
292 T\_EC then LN\_EC and finally LN\_CLECs. When measuring single-cell gene expression  
293 diversity as surrogate for differentiation potential with the CytoTRACE algorithm<sup>37</sup>  
294 (higher score means more undifferentiated, stem-like), we observed again equal scores  
295 between T\_CLECs and T\_EC but lower cytoTRACE values for LN\_EC and LN\_CLECs  
296 (Fig. 7e-f). The equal scores between T\_CLECs and T\_EC argue against a role of T\_EC  
297 as precursors for T\_CLECs, independently confirming that T\_CLECs are unlikely  
298 emerging through differentiation from the pre-existing brain tumour vasculature.  
299 However, the LN\_CLECs display the lowest cytoTRACE scores (most differentiated).

300 Based on the cytoTRACE analysis, and its logic of developmental potential, it would  
301 seem unlikely that LN\_CLEC are the origin of T\_CLEC (Fig. 7e-f). Moreover, it appears  
302 that both lineage positive and negative EC in the lymph nodes are more differentiated  
303 than endothelial cells in the tumour. It is noteworthy that Monocle was designed for  
304 developmental questions, which are strictly unidirectional. Interestingly, when plotting  
305 CytoTRACE scores onto the Monocle trajectory (Fig. 7f), the right side shows higher  
306 scores (T\_CLEC and T\_EC) and the left side (darker blue) lower scores (LN\_CLECs  
307 lowest), being in line with pseudotime. This again predicts that LN\_CLECs represent an  
308 end state rather than the origin. In summary, these data predict that during tumour growth,  
309 the T\_EC and T\_CLECs coevolve from a distinct origin to then share many aspects of  
310 their gene expression and biology, yet with a few very distinct gene profiles.

311

## 312 **DISCUSSION**

313 In this study, using inducible *Csf1r* lineage tracing in adult mice intended to study  
314 macrophage recruitment during glioma development, we identify a distinct endothelial  
315 cell lineage that forms up to 10% of the tumour vasculature in adult mice. Selective  
316 experimental depletion of this *Csf1r* endothelial cell lineage demonstrated a role in  
317 promoting vascular branching and tumour growth. Through a combination of genetic  
318 lineage tracing, longitudinal live two-photon imaging, and single cell analysis, we find  
319 that these cells arise during tumour progression, adopt dynamic endothelial phenotypes  
320 including tip cell characteristics, and express common endothelial as well as unique  
321 markers that can also be found in patient-derived tumour endothelium.

322 *Csf1r* is a well-known regulator of monocyte/ macrophage differentiation <sup>38,39</sup>, but is  
323 also important for yolk sac hematopoiesis and progenitor cell differentiation. Klotz and  
324 coworkers reported that *Csf1r*-expressing cells in the mouse embryo contribute to *Prox1*-

325 positive lymphatic endothelial cells in the cardiac lymphatic vasculature<sup>40</sup>. Moreover, a  
326 recent report identified that *Csf1r*-expressing erythro-myeloid progenitors from the early  
327 embryonic yolk-sac could give rise to intraembryonic endothelial cells in mouse  
328 development<sup>41</sup>. *Csf1r* is also expressed in EPCs, such as colony forming unit-Hill cells  
329 and circulating angiogenic cells<sup>42</sup>. In the adult however, *Csf1r* is not expressed in the  
330 mature endothelium of blood and lymphatic vessels, but continues to drive recruitment  
331 and expansion of myeloid cells in inflammation, ischemia and tumour growth<sup>43</sup>.  
332 Intriguingly, *Csf1r* itself is no longer expressed in the *Csf1r* lineage cells within the  
333 tumour and acute recombination of endothelial cells 24h after tamoxifen injection fails to  
334 label cells in the tumour vasculature. These results raise the possibility that a *Csf1r*-  
335 *expressing cell population* of endothelial nature or potential is present elsewhere in the  
336 body, recombines upon tamoxifen injection and is recruited to the tumour vasculature  
337 where it differentiates into blood endothelium to contribute to tumour angiogenesis.  
338 Alternatively, the fact that *Csf1r* expression is not detected in isolated tumour CLECs  
339 could also indicate that the Cre-line is leaky and gives rise to labelled cells through  
340 stochastic recombination. In that case, one would expect the labelled cells to populate any  
341 part of the vasculature and be otherwise indistinguishable from the unlabelled tumour EC.  
342 Single cell analysis however identifies a unique gene expression signature beyond the  
343 large number of genes that are co-expressed in T\_CLEC and T\_EC, and demonstrates  
344 that T\_CLEC are distinctly enriched in tip-cell and neo-phalanx cell populations. Thus,  
345 labelled cells show distinct phenotypes, location and expression patterns, ruling out  
346 purely stochastic recombination events. Furthermore, such stochastic recombination  
347 within the tumour vasculature would necessitate that we identify acutely labelled cells  
348 marked by co-expression of Tomato and GFP. As we failed to identify such cells at any  
349 timepoint during tumour growth, and also could detect the emergence of T\_CLECs in

350 mice only injected with tamoxifen before tumour implantation, the cumulative evidence  
351 would suggest that T\_CLECs originate outside of the tumour and also that the progenitor  
352 population resides outside of the brain. Despite all our efforts, the present work fails to  
353 provide ultimate and definitive proof of the true origin of T\_CLECs, but arrives at a clear  
354 direction and working hypothesis for future studies. In search of their origin and a  
355 potential progenitor population, we imaged and analysed all organs by FACS. We  
356 performed bone-marrow transplantation, performed splenectomy and examined the entire  
357 mouse by fluorescence stereomicroscopy after clearing to identify regions of  
358 recombination. The results of bone-marrow transplantation effectively ruled out EPC or  
359 any other known progenitors that may be found in circulation, including  
360 transdifferentiation from macrophages. Four independent observations placed a spotlight  
361 on lymphatics, and the lymph nodes in particular. First, the only *bonafide* Csf1r lineage  
362 endothelial cell population that we could identify outside of the tumours, including after  
363 complete reconstitution of the bone marrow by wildtype bone marrow, was found in the  
364 subcapsular sinus of the lymph nodes. Here the floor cells, specialized lymphatic  
365 endothelial cells that we identify as GFP and Csf1r positive line the capsule in lymph  
366 nodes in close apposition to the Csf1 expressing ceiling cells. Second, after acute  
367 tamoxifen injection the cells in the floor of the subcapsular sinus are uniquely double  
368 positive for Tomato and GFP, demonstrating acute and likely local recombination. Third,  
369 single cell RNAseq of T-CLECs identified lymphatic markers including the lymphatic  
370 master regulator Prox1 co-expressed with blood endothelial markers, and SCDE placed  
371 T\_CLECs close to lymphatic endothelial cells from various mouse tumour models in  
372 recently published datasets. And finally, CLECs can also be found in lymphatics in  
373 subcutaneous tumour models and in skin. These independent observations clearly make

374 the SCS floor cells prime candidates for the origin of T\_CLECs, but future work will be  
375 necessary for a possible direct demonstration of this link.

376 In developmental studies, lineage relationships have recently been studied by scRNAseq  
377 data sets through pseudotime analysis. In particular the CytoTRACE analysis can be  
378 useful to estimate the degree of differentiation of cell populations and thereby also predict  
379 their stemness<sup>37</sup>. Our comparative analysis of endothelial cells isolated from tumour and  
380 lymph nodes assigned the highest differentiation scores to cells in the lymph node, and  
381 lower values to the EC in tumour, including T\_CLECs. Accordingly, the cells in the floor  
382 of the SCS that carry the lineage label would rather be assumed at the end of a  
383 differentiation process rather than progenitors for other populations such as the T\_CLECs.  
384 Whether however such algorithms are suitable to determine the potential of endothelial  
385 cells to become activated and possibly transdifferentiate is unclear. In particular given the  
386 altered environmental context of EC within a growing tumour compared to a vascular bed  
387 in homeostasis. The combined monocle<sup>36</sup> and cytoTRACE analysis would fit with a  
388 general level of dedifferentiation of endothelial cells within the tumour microenvironment,  
389 and therefore a co-evolution of the cell states of both T\_EC and T\_CLEC. It is likely that  
390 pseudotemporal ordering of endothelial cells in a reactivation state will always show the  
391 reactivated cells, like in the tumour environment as less differentiated. Indeed, recent  
392 work studying the effect of chronic hypoxia on brain endothelium illustrated the wide  
393 range of reactivation, in particular noting a strong increase in tip cell population amongst  
394 the brain endothelial cells<sup>44</sup>. The current assumption states that these new tip cells arise  
395 under hypoxia from pre-existing brain endothelial cells, and possibly emerge from  
396 particular endothelial subpopulations. In the absence of lineage tracing, an alternative  
397 possibility, raised by our current observation in tumour angiogenesis, could be that new  
398 tip cells arise at least in part elsewhere, and are recruited to the hypoxic vessel areas.



399 More work on vascular single cell analysis will be required to establish the fundamental  
400 principles of endothelial activation and their interpretation for the different tissue  
401 challenges that require vascular adaptations.

402 Angiogenesis is essential for tumour growth, and contributes to metastasis <sup>45,46</sup>. Early  
403 hopes that targeting tumour angiogenesis may prove uniquely selective and effective as  
404 anti-tumour treatment have, however, been disappointing. Intense research efforts  
405 therefore currently focus on understanding reasons and mechanisms for resistance to anti-  
406 angiogenic therapy, and identifying new cellular and molecular targets to effectively  
407 modify the tumour vasculature <sup>47</sup>. Intravital imaging shows that T\_CLECs arise during  
408 tumour progression, adopt endothelial phenotypes with tip cell characteristics and line  
409 perfused vascular tubes. Consistent with this observation, AUCell analysis of scRNA-seq  
410 data in human samples identifies that T\_CLECs signatures are highly enriched in tip cell  
411 subpopulation. A recent study using single-cell transcriptome analysis revealed that anti-  
412 VEGF (vascular endothelial growth factor) treatment reduces the proportion of  
413 endothelial tip-like cells in a tumour xenografts <sup>48</sup>. How CLECs affect the outcome of  
414 anti-angiogenic treatment will be important to investigate in the future. Considering that  
415 T\_CLECs prominently express *Vegfr3*, even more so than regular endothelial cells in the  
416 tumour, we can speculate that T\_CLECs are resistant to anti-VEGFR2 treatment, and  
417 possibly escape treatment through the activity of VEGFR3. If so CLECs may adversely  
418 affect anti-angiogenic therapy targeting VEGFR2 selectively. Tumour blood vessels are  
419 generally highly tortuous and the branching pattern is greatly different from normal blood  
420 vessels. Our results from the selective targeting of CLECs in the mouse glioma model  
421 show that CLECs ablation decreases both vessel branching and tumour growth. Thus, in  
422 the absence of CLEC, the dysmorphic vascular phenotype in tumours appears exacerbated,  
423 suggesting that CLECs support the formation of a highly branched vascular network,

424 which in turn better promotes tumour growth. Future work will be required to identify the  
425 true origin of T\_CLECs and to extend this functional analysis to fully appreciate the  
426 consequence and opportunities to target or utilize CLECs for therapeutic approaches.

427

428

## 429 **METHODS**

### 430 ***Mice***

431 Mice expressing both the *Csf1r-Mer-iCre-Mer* transgene (*Csf1r-Mer2.Cre*)<sup>17</sup> and the  
432 *Rosa<sup>mTmG</sup>* Cre recombination reporter<sup>18</sup> were generated by breeding. Mice carrying the  
433 Endothelial specific *Cdh5-Dre* mice<sup>24</sup> were mated with *Csf1r-Mer2.Cre* mice and  
434 *Rosa26-RSR-LSL-tdTomato* mice<sup>23</sup> to obtain *Cdh5-Dre::Csf1r-Mer2.Cre::Rosa26-RSR-*  
435 *LSL-tdTomato* mice (*DreMer2.Cre<sup>tdTomato</sup>*) that allows combinatorial genetics as a tool for  
436 CLECs tracing. Endothelial specific *Cdh5-Dre* mice were mated with *Csf1r-Mer2.Cre*  
437 mice and *Rosa26-RSR-mTmG-DTR* mice to obtain *Cdh5-Dre::Csf1r-Mer2.Cre::Rosa26-*  
438 *RSR-mTmG-DTR* mice (*DreMer2.Cre<sup>mTmG-DTR</sup>*) that allows for selective tracing and  
439 ablation of CLECs. *Rosa26-RSR-mTmG-DTR* mice were designed by Dr. Fabio Stanchi  
440 and generated by the team of Dr. Ralf Kühn at the Max Delbrück Center in Germany. All  
441 mouse strains were maintained on C57BL/6J background. Animal housing and all  
442 experimental procedures were approved by the Institutional Animal Care and Research  
443 Advisory Committee of the KU Leuven (085/2016).

### 444 ***Cell lines***

445 CT2A, GL261 glioma cell lines and B16F1 melanoma cell line were cultured in DMEM  
446 (Life Technologies) supplemented with 10% FBS (Life Technologies), 1% penicillin/  
447 streptomycin (Life Technologies) and 1% glutamine (Life Technologies). Spheroids were  
448 obtained by seeding the glioma cells for 48h on non-adherent culture dishes. Spheroids

449 of 200- 250µm were selected for implantation.

#### 450 ***Intravital imaging on mouse gliomas***

451 Surgery for tumor implantation, installation of cranial windows and *in vivo* imaging were  
452 performed as described previously<sup>16</sup>. Briefly, 8– 12-weeks-old mice were anesthetized  
453 with ketamine/ xylazine and a craniotomy was performed on the parietal bone. Spheroids  
454 of CT2A or GL261 cells modified to express the blue fluorescent protein TagBFP<sup>50</sup> were  
455 injected in the exposed parietal brain cortex, which was then sealed by cementing a glass  
456 coverslip to the bone surrounding the craniotomy. After surgery, mice were injected  
457 intraperitoneally with tamoxifen (65 µg/g body weight) every 5 days. For CLECs  
458 depletion, mice were injected intraperitoneally with diphtheria toxin (4 ng/g body weight)  
459 the next day after tamoxifen induction. Longitudinal *in vivo* imaging of growing tumors  
460 was performed in mice under isoflurane anesthesia using a SP8 upright microscope (Leica  
461 Microsystems) equipped with a HCX IRAPO L25x/0.95 water objective and a Titanium:  
462 Sapphire laser (Vision II, Coherent Inc.) tuned at 925 nm. Humane end-point of  
463 experiments was applied if animals lost 15-20% of their original weight or shown evident  
464 signs of distress.

#### 465 ***Immunofluorescence imaging***

466 Mice anesthetized with ketamine/ xylazine were perfused through the heart with 15 ml of  
467 ice-cold PBS, followed by 10 ml of 2% PFA in PBS. Tumour tissues or organs were  
468 harvested and fixed overnight in 4% PFA. For tumour tissues, sections (200 µm-thick)  
469 were prepared with a vibratome 650V (Thermo Scientific). For organ samples, frozen  
470 sections (10 µm-thick) were prepared with a cryostat NX70 (Thermo Scientific). For  
471 immunofluorescence imaging studies, the PFA-fixed sections were blocked and  
472 permeabilized in TNBT (0.1 M Tris, pH 7.4, 150 mM NaCl, 0.5% blocking reagent from  
473 Perkin Elmer, 0.5% Triton X-100) for 4h at room temperature. Sections were incubated

474 with antibodies against CDH5 (1:25, AF1002, R&D), CD31 (1:100, ab28364, Abcam),  
475 F4/80 (1:100, MF48000, Invitrogen), CD45 (1:100, 550539, BD Pharmingen), CD169  
476 (1:100, 142401, Biolegend), PROX1 (1:200, 11-002, Angiobio), AQP1 (1:4000, AB2219,  
477 Millipore), LYVE1 (1:100, 50-0433-80, eBioscience) diluted in TNBT buffer overnight  
478 at 4°C, washed in TNT buffer (0.1 M Tris pH 7.4; 150 mM NaCl, 0.5% Triton X-100)  
479 and incubated with an Alexa Fluor conjugated antibodies (1:200, ThermoFisher  
480 Scientific). Sections were washed and mounted in fluorescent mounting medium (Dako).  
481 Images were obtained with a Leica TCS SP8 confocal microscope.

#### 482 ***Flow cytometric analysis***

483 Mice were anesthetized with ketamine/ xylazine, then tumour tissues or organs were  
484 harvested and incubated with PBS containing 1mg/ml collagenase I (Gibco), 2 mg/ ml  
485 Dispase I (Gibco), 100ug/ml DNase I (Roche) and 2 mM CaCl<sub>2</sub> for 30 min at 37 °C. After  
486 incubation, the digested tissue was passed through a cell strainer and then washed by PBS  
487 including 2% FBS. For red cell exclusion, we incubated samples with red cell lysis buffer  
488 (Sigma) for 5 min at 37 °C and then washed by PBS including 2% FBS and 2 mM EDTA.  
489 Cells were stained with the following monoclonal antibodies: PE/ Cy7 anti-CD45  
490 (552848, BD), APC anti-CD31 (561814, BD). Data acquisition was performed with BD  
491 FACSVerse and analysis was performed with BD FACSuite software, and FlowJo  
492 software.

#### 493 ***Mouse melanoma model***

494 Mice (8–12-weeks-old) were anesthetized with ketamine/ xylazine and then 1x10<sup>6</sup> B16F1  
495 melanoma cells in PBS were implanted into the right flank region of the mice. B16F1  
496 melanomas were removed from mice 12 days after implantation for immunofluorescent  
497 imaging studies and flow cytometric analysis. Mice were injected intraperitoneally with  
498 tamoxifen (65 µg/g body weight) 4 time/ 2 weeks before tumour implantation and then

499 intraperitoneally with tamoxifen (65 µg/g body weight) every 5 days after tumour  
500 implantation.

### 501 ***Single cell isolation and RNA-sequencing***

502 Single cells were sorted (BD FACSAriaIII) in 96 well plates (VWR) containing 2 µL of  
503 PBS including 0.2% Triton X-100 and 4U of RNase inhibitor (Takara) per well. Plates  
504 were properly sealed and spun down at 2000 g for 1 min before storing at –80°C. Whole  
505 transcriptome amplification was performed with a modified SMART-seq2 protocol as  
506 described previously <sup>25</sup>, using 20 instead of 18 cycles of cDNA amplification. PCR  
507 purification was realized with a 0.8:1 ratio (ampureXP beads:DNA). Amplified cDNA  
508 quality was monitored with a high sensitivity DNA chip (Agilent) using the Bioanalyzer  
509 (Agilent). Sequencing libraries were performed using the Nextera XT kit (Illumina) as  
510 described previously <sup>25</sup>, using 1/4th of the recommended reagent volumes and 1/5th of  
511 input DNA with a tagmentation time of 9 min. Library quality was monitored with a high  
512 sensitivity DNA chip (Agilent) using the Bioanalyzer (Agilent). Indexing was performed  
513 with the Nextera XT index Kit V2 (A-D). Up to 4 x 96 single cells were pooled per  
514 sequencing lane. Samples were sequenced on the Illumina NextSeq 500 platform using  
515 75bp single-end reads.

### 516 ***scRNA-sequencing data analysis***

517 BAM files were converted to merged, demultiplexed FASTQ files, cleaned using fastq-  
518 mcf (ea-utils r819), and QC checked with FastQC (0.11.4). Reads were then mapped to  
519 the mouse genome (mm18) using STAR (2.4.1b) and quantified with Subread (1.4.6-p2).  
520 Cells with less than 100,000 reads and/or 500 genes expressed, more than 20%  
521 mitochondrial reads, and less than an average expression level of 3.0 of about 80  
522 housekeeping genes <sup>51</sup> were discarded. 469 cells passed these stringent quality criteria.  
523 Winsorized Highly Variable genes (HVGs) were identified for tumor derived

524 macrophages (T\_MACs), endothelial cell (T\_EC) and *Csf1r* lineage endothelial cells  
525 (T\_CLECs)<sup>26</sup>. These cells were then clustered based on HVG expression using non-  
526 negative matrix factorization as dimension reduction approach (run=40, rank=10, in MeV  
527 4.8.1). The “best fit” (numbers of clusters) was chosen based on the highest cophenetic  
528 correlation coefficient. Next, Single-cell Differential Expression analysis (SCDE) was  
529 performed between the different NMF-clusters using the global gene expression matrix  
530<sup>26</sup>. Expression values were library-size-factor-normalized (DESeq) and log2 transformed  
531 (log2+1). T\_MAC, T\_EC, T\_CLEC and LN\_CLECS, LN\_EC, T\_CLEC, T\_EC cells  
532 were projected into a two-dimensional space using Uniform Manifold Approximation and  
533 Projection (dims=15, resolution = 0.4) based on 5k most variable features (Seurat  
534 pipeline)<sup>52</sup>. Monocle (2.14) based trajectory analysis was performed on T\_CLEC, T\_EC,  
535 LN\_CELC and LN\_EC (total=454 cells) taking into account n=790 m3Drop genes. The  
536 same data set was subjected to CytoTRACE analysis using the online tool  
537 (<https://cytotrace.stanford.edu/>)<sup>37</sup>.

538

### 539 *AUCell analysis of human scRNA-seq data in multiple tumours*

540 The droplet-based scRNA-seq data of 4 human tumour types were downloaded from  
541 publicly available sources including lung cancer (ArrayExpress: E-MTAB-6149 and E-  
542 MTAB-6653)<sup>53</sup>, PDAC (GSA: CRA001160)<sup>54</sup>, liver cancer (GEO: GSE125449)<sup>55</sup>, and  
543 BCC (GEO: GSE123814)<sup>56</sup>. These datasets were processed and clustered per tumour type  
544 using Seurat (v3.0.4) package, and the endothelial cell clusters were identified using  
545 marker genes (*CLDN5*, *VWF*, *PECAMI*). The resulting endothelial cell data were pooled  
546 together and aligned using anchor-based canonical correlation analysis (CCA) to mitigate  
547 the difference related to distinct tumor types and scRNA-seq technologies. Initial graph-  
548 based clustering identified 10 clusters including 3 potential doublet clusters as predicted

549 by DoubleFinder (v2), which were subsequently removed before second round of  
550 clustering. The resulting 8 clusters consisting of 7314 endothelial cells were annotated  
551 based on known marker genes, and their CLECs signature were calculated using AUCell  
552 package (v1.6.1). The threshold of AUC score was chosen at the peak of the right modal,  
553 and the percentage of putative CLECs were calculated for different subtypes and their  
554 tumour type of origin.

### 555 *Generation of bone marrow chimeras*

556 Recipient 8-10-weeks-old mice were lethally irradiated (9.5 Gy) and then intravenously  
557 injected with  $1 \times 10^7$  bone marrow cells from donor mice 16 h later. Tumour implantation  
558 experiments were initiated 8 weeks after bone marrow reconstitution. Reconstitution rate  
559 was determined using flow cytometric analysis in the peripheral blood.

### 560 *Surgical removal of the spleen*

561 Mice (8–12-weeks-old) were anesthetized with ketamine/ xylazine and then the spleen  
562 was gently taken out from the connective tissue, while cauterizing associated vessels. The  
563 incision was thereafter sutured. These procedures were performed as described previously  
564 <sup>57</sup>.

### 565 *Vessel morphology analysis*

566 Confocal images of the tumour vasculature were analyzed for two-dimensional vessel  
567 area, network length and number of network bifurcation points. The tdTomato and GFP  
568 channels were merged and a Gaussian blur filter as well as Otsu thresholding was applied  
569 to obtain binary vessel mask for sectional area estimation. To obtain the vessel network,  
570 a semi-automatic multicut workflow from ilastik <sup>58</sup> was applied to all images. The  
571 segmented vessels were skeletonized and converted into a network graph with nodes and  
572 edges by using the Python package ImagePy <sup>59</sup>. The lengths of network edges were  
573 summed up to obtain the total network length for each image, all nodes with a degree of

574 three or more were counted as bifurcations.

### 575 *Statistics*

576 Statistical analyses of data were performed with GraphPad Prism 7.0 software. All data  
577 are shown as the means  $\pm$  standard deviations. Differences were assessed using a two-  
578 tailed unpaired Mann-Whitney's U test or two-tailed unpaired Welch's correction.

579

### 580 **AUTHOR CONTRIBUTIONS**

581 KM led and conceived the project, designed and performed experiments, analysed and  
582 interpreted data. FR, FS, TM, WG, LH, JQ performed experiments and analyzed data.  
583 DL, BZ, CB, JM and HG analyzed data. HG conceived and supervised the project. KM  
584 and HG wrote and edited the manuscript, with contribution by all authors.

585

### 586 **ACKNOWLEDGEMENT**

587 This work was supported by the Belgian Cancer Foundation (Stichting Tegen Kanker,  
588 grant 2012-181, 2018-074) and a Hercules type 2 grant (Herculesstichting: AKUL11033).  
589 K.M. is a recipient of a Japan Society for the Promotion of Science Overseas Research  
590 Fellowship. We would like to thank Dr. Till Acker (Institute of Neuropathology,  
591 University of Giessen, Germany) and Dr. Thomas N. Seyfried (Biology department,  
592 Boston College, USA) for the gift of GL261 and CT2A cells, respectively. We are grateful  
593 for outstanding advice and service by Dr. Ralf Kühn heading the Transgenics Core  
594 Facility at the Max-Delbrueck-Center, Berlin, Germany. We would like to thank our  
595 colleagues Marly Balcer, Lisse Decraecker, Greet Bervoets and Irene Hollfingler for  
596 excellent technical assistance.

597

### 598 **CODE AVAILABILITY**



599 The computational code (R) used for scRNA-seq analysis is based on already published  
600 pipelines (see Material and Methods) and available upon request.

601

## 602 **DATA AVAILABILITY**

603 All scRNA-seq data are available at Gene Expression Omnibus under accession number  
604 GSE157507.

605

## 606 **STATISTICS**

607 Differences were assessed using either a two-tailed unpaired Mann-Whitney's or two-  
608 tailed unpaired t-test with Welch correction. All planned comparisons were considered  
609 stand-alone and were not corrected for multiple testing.

610

## 611 **REFERENCES**

- 612 1 Asahara, T. *et al.* Isolation of putative progenitor endothelial cells for  
613 angiogenesis. *Science* **275**, 964-967, doi:10.1126/science.275.5302.964 (1997).
- 614 2 Shi, Q. *et al.* Evidence for circulating bone marrow-derived endothelial cells.  
615 *Blood* **92**, 362-367 (1998).
- 616 3 Asahara, T. *et al.* Bone marrow origin of endothelial progenitor cells responsible  
617 for postnatal vasculogenesis in physiological and pathological neovascularization.  
618 *Circ Res* **85**, 221-228, doi:10.1161/01.res.85.3.221 (1999).
- 619 4 Peters, B. A. *et al.* Contribution of bone marrow-derived endothelial cells to  
620 human tumor vasculature. *Nat Med* **11**, 261-262, doi:10.1038/nm1200 (2005).
- 621 5 Rafii, S., Lyden, D., Benezra, R., Hattori, K. & Heissig, B. Vascular and  
622 haematopoietic stem cells: novel targets for anti-angiogenesis therapy? *Nat Rev*  
623 *Cancer* **2**, 826-835, doi:10.1038/nrc925 (2002).

- 624 6 Rafii, S. & Lyden, D. Therapeutic stem and progenitor cell transplantation for  
625 organ vascularization and regeneration. *Nat Med* **9**, 702-712,  
626 doi:10.1038/nm0603-702 (2003).
- 627 7 Religa, P. *et al.* Presence of bone marrow-derived circulating progenitor  
628 endothelial cells in the newly formed lymphatic vessels. *Blood* **106**, 4184-4190,  
629 doi:10.1182/blood-2005-01-0226 (2005).
- 630 8 Kerjaschki, D. *et al.* Lymphatic endothelial progenitor cells contribute to de novo  
631 lymphangiogenesis in human renal transplants. *Nat Med* **12**, 230-234,  
632 doi:10.1038/nm1340 (2006).
- 633 9 Purhonen, S. *et al.* Bone marrow-derived circulating endothelial precursors do not  
634 contribute to vascular endothelium and are not needed for tumor growth. *Proc*  
635 *Natl Acad Sci U S A* **105**, 6620-6625, doi:10.1073/pnas.0710516105 (2008).
- 636 10 Kerbel, R. S. *et al.* Endothelial progenitor cells are cellular hubs essential for  
637 neoangiogenesis of certain aggressive adenocarcinomas and metastatic transition  
638 but not adenomas. *Proc Natl Acad Sci U S A* **105**, E54; author reply E55,  
639 doi:10.1073/pnas.0804876105 (2008).
- 640 11 Basile, D. P. & Yoder, M. C. Circulating and tissue resident endothelial progenitor  
641 cells. *J Cell Physiol* **229**, 10-16, doi:10.1002/jcp.24423 (2014).
- 642 12 Psaltis, P. J. & Simari, R. D. Vascular wall progenitor cells in health and disease.  
643 *Circ Res* **116**, 1392-1412, doi:10.1161/CIRCRESAHA.116.305368 (2015).
- 644 13 Fujisawa, T. *et al.* Endothelial Progenitor Cells Do Not Originate From the Bone  
645 Marrow. *Circulation* **140**, 1524-1526,  
646 doi:10.1161/CIRCULATIONAHA.119.042351 (2019).
- 647 14 Martinez-Murillo, R. & Martinez, A. Standardization of an orthotopic mouse  
648 brain tumor model following transplantation of CT-2A astrocytoma cells. *Histol*

- 649            *Histopathol* **22**, 1309-1326, doi:10.14670/HH-22.1309 (2007).
- 650    15        Zagzag, D. *et al.* Expression of hypoxia-inducible factor 1alpha in brain tumors:  
651            association with angiogenesis, invasion, and progression. *Cancer* **88**, 2606-2618  
652            (2000).
- 653    16        Stanchi, F., Matsumoto, K. & Gerhardt, H. Imaging Glioma Progression by  
654            Intravital Microscopy. *Methods Mol Biol* **1862**, 227-243, doi:10.1007/978-1-  
655            4939-8769-6\_16 (2019).
- 656    17        Qian, B. Z. *et al.* CCL2 recruits inflammatory monocytes to facilitate breast-  
657            tumour metastasis. *Nature* **475**, 222-225, doi:10.1038/nature10138 (2011).
- 658    18        Muzumdar, M. D., Tasic, B., Miyamichi, K., Li, L. & Luo, L. A global double-  
659            fluorescent Cre reporter mouse. *Genesis* **45**, 593-605, doi:10.1002/dvg.20335  
660            (2007).
- 661    19        Mathivet, T. *et al.* Dynamic stroma reorganization drives blood vessel dysmorphia  
662            during glioma growth. *EMBO Mol Med* **9**, 1629-1645,  
663            doi:10.15252/emmm.201607445 (2017).
- 664    20        Raivich, G. *et al.* Regulation of MCSF receptors on microglia in the normal and  
665            injured mouse central nervous system: a quantitative immunofluorescence study  
666            using confocal laser microscopy. *J Comp Neurol* **395**, 342-358,  
667            doi:10.1002/(sici)1096-9861(19980808)395:3<342::aid-cne6>3.0.co;2-2 (1998).
- 668    21        Jin, S. *et al.* Interleukin-34 restores blood-brain barrier integrity by upregulating  
669            tight junction proteins in endothelial cells. *PLoS One* **9**, e115981,  
670            doi:10.1371/journal.pone.0115981 (2014).
- 671    22        Vanlandewijck, M. *et al.* A molecular atlas of cell types and zonation in the brain  
672            vasculature. *Nature* **554**, 475-480, doi:10.1038/nature25739 (2018).
- 673    23        Liu, Q. *et al.* Lung regeneration by multipotent stem cells residing at the

- 674 bronchioalveolar-duct junction. *Nat Genet* **51**, 728-738, doi:10.1038/s41588-019-  
675 0346-6 (2019).
- 676 24 Tang, M. *et al.* Simultaneous quantitative assessment of two distinct cell lineages  
677 with a nuclear-localized dual genetic reporter. *J Mol Cell Cardiol* **146**, 60-68,  
678 doi:10.1016/j.yjmcc.2020.07.002 (2020).
- 679 25 Picelli, S. *et al.* Full-length RNA-seq from single cells using Smart-seq2. *Nat*  
680 *Protoc* **9**, 171-181, doi:10.1038/nprot.2014.006 (2014).
- 681 26 Kharchenko, P. V., Silberstein, L. & Scadden, D. T. Bayesian approach to single-  
682 cell differential expression analysis. *Nat Methods* **11**, 740-742,  
683 doi:10.1038/nmeth.2967 (2014).
- 684 27 Saadoun, S., Papadopoulos, M. C., Hara-Chikuma, M. & Verkman, A. S.  
685 Impairment of angiogenesis and cell migration by targeted aquaporin-1 gene  
686 disruption. *Nature* **434**, 786-792, doi:10.1038/nature03460 (2005).
- 687 28 Aibar, S. *et al.* SCENIC: single-cell regulatory network inference and clustering.  
688 *Nat Methods* **14**, 1083-1086, doi:10.1038/nmeth.4463 (2017).
- 689 29 Eelen, G. *et al.* Role of glutamine synthetase in angiogenesis beyond glutamine  
690 synthesis. *Nature* **561**, 63-69, doi:10.1038/s41586-018-0466-7 (2018).
- 691 30 Zhang, M. *et al.* CXCL12 enhances angiogenesis through CXCR7 activation in  
692 human umbilical vein endothelial cells. *Sci Rep* **7**, 8289, doi:10.1038/s41598-017-  
693 08840-y (2017).
- 694 31 Goveia, J. *et al.* An Integrated Gene Expression Landscape Profiling Approach to  
695 Identify Lung Tumor Endothelial Cell Heterogeneity and Angiogenic Candidates.  
696 *Cancer cell* **37**, 21-36 e13, doi:10.1016/j.ccell.2019.12.001 (2020).
- 697 32 Rohlenova, K. *et al.* Single-Cell RNA Sequencing Maps Endothelial Metabolic  
698 Plasticity in Pathological Angiogenesis. *Cell Metab* **31**, 862-877 e814,

- 699           doi:10.1016/j.cmet.2020.03.009 (2020).
- 700    33    Yang, Y. & Oliver, G. Development of the mammalian lymphatic vasculature.  
701           *The Journal of clinical investigation* **124**, 888-897, doi:10.1172/JCI71609 (2014).
- 702    34    Fujimoto, N. *et al.* Single-cell mapping reveals new markers and functions of  
703           lymphatic endothelial cells in lymph nodes. *PLoS biology* **18**, e3000704,  
704           doi:10.1371/journal.pbio.3000704 (2020).
- 705    35    Bazigou, E. *et al.* Integrin-alpha9 is required for fibronectin matrix assembly  
706           during lymphatic valve morphogenesis. *Developmental cell* **17**, 175-186,  
707           doi:10.1016/j.devcel.2009.06.017 (2009).
- 708    36    Trapnell, C. *et al.* The dynamics and regulators of cell fate decisions are revealed  
709           by pseudotemporal ordering of single cells. *Nature biotechnology* **32**, 381-386,  
710           doi:10.1038/nbt.2859 (2014).
- 711    37    Gulati, G. S. *et al.* Single-cell transcriptional diversity is a hallmark of  
712           developmental potential. *Science* **367**, 405-411, doi:10.1126/science.aax0249  
713           (2020).
- 714    38    Tushinski, R. J. *et al.* Survival of mononuclear phagocytes depends on a lineage-  
715           specific growth factor that the differentiated cells selectively destroy. *Cell* **28**, 71-  
716           81, doi:10.1016/0092-8674(82)90376-2 (1982).
- 717    39    Dai, X. M. *et al.* Targeted disruption of the mouse colony-stimulating factor 1  
718           receptor gene results in osteopetrosis, mononuclear phagocyte deficiency,  
719           increased primitive progenitor cell frequencies, and reproductive defects. *Blood*  
720           **99**, 111-120, doi:10.1182/blood.v99.1.111 (2002).
- 721    40    Klotz, L. *et al.* Cardiac lymphatics are heterogeneous in origin and respond to  
722           injury. *Nature* **522**, 62-67, doi:10.1038/nature14483 (2015).
- 723    41    Plein, A., Fantin, A., Denti, L., Pollard, J. W. & Ruhrberg, C. Erythro-myeloid

- 724 progenitors contribute endothelial cells to blood vessels. *Nature* **562**, 223-228,  
725 doi:10.1038/s41586-018-0552-x (2018).
- 726 42 Hirschi, K. K., Ingram, D. A. & Yoder, M. C. Assessing identity, phenotype, and  
727 fate of endothelial progenitor cells. *Arterioscler Thromb Vasc Biol* **28**, 1584-1595,  
728 doi:10.1161/ATVBAHA.107.155960 (2008).
- 729 43 Mantovani, A., Marchesi, F., Malesci, A., Laghi, L. & Allavena, P. Tumour-  
730 associated macrophages as treatment targets in oncology. *Nat Rev Clin Oncol* **14**,  
731 399-416, doi:10.1038/nrclinonc.2016.217 (2017).
- 732 44 Heng, J. S. *et al.* Hypoxia tolerance in the Norrin-deficient retina and the  
733 chronically hypoxic brain studied at single-cell resolution. *Proceedings of the*  
734 *National Academy of Sciences of the United States of America* **116**, 9103-9114,  
735 doi:10.1073/pnas.1821122116 (2019).
- 736 45 Folkman, J. Tumor angiogenesis: therapeutic implications. *N Engl J Med* **285**,  
737 1182-1186 (1971).
- 738 46 Ferrara, N. & Kerbel, R. S. Angiogenesis as a therapeutic target. *Nature* **438**, 967-  
739 974, doi:10.1038/nature04483 (2005).
- 740 47 Welte, J., Loges, S., Dimmeler, S. & Carmeliet, P. Recent molecular discoveries  
741 in angiogenesis and antiangiogenic therapies in cancer. *J Clin Invest* **123**, 3190-  
742 3200, doi:10.1172/JCI70212 (2013).
- 743 48 Zhao, Q. *et al.* Single-Cell Transcriptome Analyses Reveal Endothelial Cell  
744 Heterogeneity in Tumors and Changes following Antiangiogenic Treatment.  
745 *Cancer Res* **78**, 2370-2382, doi:10.1158/0008-5472.CAN-17-2728 (2018).
- 746 49 Bazigou, E. *et al.* Genes regulating lymphangiogenesis control venous valve  
747 formation and maintenance in mice. *The Journal of clinical investigation* **121**,  
748 2984-2992, doi:10.1172/JCI58050 (2011).

- 749 50 Subach, O. M. *et al.* Conversion of red fluorescent protein into a bright blue probe.  
750 *Chem Biol* **15**, 1116-1124, doi:10.1016/j.chembiol.2008.08.006 (2008).
- 751 51 Tirosh, I. *et al.* Dissecting the multicellular ecosystem of metastatic melanoma by  
752 single-cell RNA-seq. *Science* **352**, 189-196, doi:10.1126/science.aad0501 (2016).
- 753 52 Stuart, T. *et al.* Comprehensive Integration of Single-Cell Data. *Cell* **177**, 1888-  
754 1902 e1821, doi:10.1016/j.cell.2019.05.031 (2019).
- 755 53 Lambrechts, D. *et al.* Phenotype molding of stromal cells in the lung tumor  
756 microenvironment. *Nat Med* **24**, 1277-1289, doi:10.1038/s41591-018-0096-5  
757 (2018).
- 758 54 Peng, J. *et al.* Single-cell RNA-seq highlights intra-tumoral heterogeneity and  
759 malignant progression in pancreatic ductal adenocarcinoma. *Cell Res* **29**, 725-738,  
760 doi:10.1038/s41422-019-0195-y (2019).
- 761 55 Ma, L. *et al.* Tumor Cell Biodiversity Drives Microenvironmental  
762 Reprogramming in Liver Cancer. *Cancer Cell* **36**, 418-430 e416,  
763 doi:10.1016/j.ccell.2019.08.007 (2019).
- 764 56 Yost, K. E. *et al.* Clonal replacement of tumor-specific T cells following PD-1  
765 blockade. *Nat Med* **25**, 1251-1259, doi:10.1038/s41591-019-0522-3 (2019).
- 766 57 Cortez-Retamozo, V. *et al.* Origins of tumor-associated macrophages and  
767 neutrophils. *Proc Natl Acad Sci U S A* **109**, 2491-2496,  
768 doi:10.1073/pnas.1113744109 (2012).
- 769 58 Berg, S. *et al.* ilastik: interactive machine learning for (bio)image analysis. *Nat*  
770 *Methods* **16**, 1226-1232, doi:10.1038/s41592-019-0582-9 (2019).
- 771 59 Wang, A., Yan, X. & Wei, Z. ImagePy: an open-source, Python-based and  
772 platform-independent software package for bioimage analysis. *Bioinformatics* **34**,  
773 3238-3240, doi:10.1093/bioinformatics/bty313 (2018).

774

## 775 **FIGURE LEGENDS**

776 **Fig. 1: Csf1r lineage endothelial cells (CLECs) contribute to perfused, dynamically**

777 **sprouting and remodeling blood vessels in mouse glioma.** a, Csf1r-Mer2.CremTmG:

778 a mouse model for Csf1r-lineage tracing combining the tamoxifen-inducible Cre-driver

779 under control of the Csf1r-promoter and the mTmG Cre-reporter. b, Timing schedule of

780 glioma implantation, tamoxifen induction and in vivo imaging. c-f, Longitudinal

781 intravital imaging of the tumour vasculature in CT2A mouse glioma of Csf1r-

782 Mer2.CremTmG by cranial window. Scale bar: 50  $\mu$ m. c, In vivo imaging in 3 weeks

783 glioma. Endothelial cells in red (tdTomato), Csf1r-labeled cells in green (GFP) and

784 glioma cells in blue (BFP). d, Detail image of outlined square in Fig. 1c illustrating tracing

785 of GFP-positive cells. White arrowheads, macrophages; blue arrowhead, CLECs at tip

786 position. e, In vivo imaging of CLECs in 2 weeks glioma. Blue arrowheads, tip of

787 endothelial cells. f, Visualization of blood vessels in 3 weeks glioma by Intravenous

788 injection of dextran with texas red dye. Yellow arrowhead, bridging CLECs; orange

789 arrowhead, tube formation by CLECs; blue arrowhead, CLECs at tip position. g-h,

790 Counterstaining on PFA-fixed 4 weeks CT2A glioma sections of Csf1r-Mer2.CremTmG

791 with indicated antibodies. Yellow arrows, CLECs. Scale bar: 25  $\mu$ m.

792 **Fig. 2: Up to 10% of intra-tumour endothelium is comprised of CLECs not only in**

793 **glioma, but also in other tumour types and locations.** a-i, Quantification of the

794 population of CLECs in glioma of Csf1r-Mer2.CremTmG mice. a, Gross appearance of

795 sham control and 4 weeks CT2A glioma (Upper panel). Purple arrowhead, the area of

796 capillary injection; blue arrowhead, glioma. Scale bar: 5 mm. Flow cytometric analysis

797 of CLECs in sham control and 4 weeks CT2A glioma (Lower panel). b, In 3 weeks CT2A



798 glioma (n= 9), CLECs constitute  $2.1 \pm 1.0\%$  of total endothelial cells (CD45-CD31+); in  
799 4 weeks CT2A glioma (n= 5), they make up  $7.5 \pm 1.6\%$  of total endothelial cells. c, In 3  
800 weeks GL261 glioma (n= 5), CLECs constitute  $1.5 \pm 1.6\%$  of total endothelial cells. d,  
801 Gross appearance of normal brain, sham control and 3 weeks CT2A glioma. Purple  
802 arrowhead, area of capillary injection. Scale bar: 5 mm. e-f, Quantification of the  
803 population of CLECs by flow cytometric analysis in brain and tumour samples. Bars  
804 represent mean  $\pm$  s.d. \* $p < 0.05$ , \*\* $p < 0.01$ , \*\*\* $p < 0.001$ , \*\*\*\* $p < 0.0001$ . Two-tailed  
805 unpaired Mann-Whitney' s U test. i-j, Analysis of CLECs in B16F1 melanoma in Csf1r-  
806 Mer2.CremTmG mice. g, Counterstaining on PFA-fixed section of day12 melanoma with  
807 CDH5 antibody. Yellow arrows, CLECs. Scale bar: 50  $\mu$ m. h, CLECs constitute  $2.8 \pm$   
808  $0.75\%$  of total endothelial cells in day 12 melanoma (n=4).

809 **Fig. 3: CLECs do not originate from the bone marrow.** a-b, Tamoxifen induction  
810 timing. b, Quantification of the population of tumour macrophagens (T\_MACs:  
811 CD45+GFP+) and tumour CLECs (T\_CLECs: CD45-CD31+GFP+) by flow cytometric  
812 analysis in tumour samples (n=4). Bars represent mean  $\pm$  s.d. c, Fluorescent images of  
813 PFA-fixed 3 weeks CT2A glioma de of Csf1r-Mer2.CremTmG mice within 24 hours after  
814 tamoxifen induction. Scale bar: 100  $\mu$ m. d-e, Flow cytometric analysis of CT2A-glioma  
815 in bone marrow chimeras. d, BMCsf1r-mer2.CremTmG: C57BL/6J mice are used as  
816 recipients and Csf1r-Mer2.CremTmG mice used as donors. Within the sorted myeloid  
817 cell population (BFP-CD45+),  $32.3 \pm 12.1\%$  are GFP-positive in Csf1r-Mer2.CremTmG  
818 mice (n= 10), and  $33.8 \pm 6.9\%$  are GFP-positive in bone-marrow transplanted BMCsf1r-  
819 Mer2.CremTmG mice (n= 12). Among endothelial cell population (BFP-CD45-CD31+),  
820  $4.3 \pm 1.9\%$  are GFP-positive in Csf1r-Mer2.CremTmG mice (n= 10), whereas no GFP-  
821 positive endothelial cells are found in BMCsf1r-Mer2.CremTmG mice (n= 12). e, Csf1r-

822 Mer2.CremTmG:: BMWT: Csf1r-Mer2.CremTmG are used as recipients and C57BL/6J  
823 as donors. Of the sorted myeloid cell population,  $43.4 \pm 11.3\%$  GFP-positive cells are  
824 found in Csf1r-Mer2.CremTmG mice (n= 6), whereas  $0.1 \pm 0.1\%$  GFP-positive cells are  
825 found in Csf1r-Mer2.CremTmG:: BMWT mice (n= 4). Of the endothelial cell population,  
826  $10.5 \pm 9.7\%$  GFP-positive cells are found in Csf1r-Mer2.CremTmG mice (n= 6), and  $9.3$   
827  $\pm 3.7\%$  GFP-positive cells are found in Csf1r-Mer2.CremTmG:: BMWT mice (n= 4).  
828 Bars represent mean  $\pm$  s.d. \*p<0.05, \*\*p<0.01, \*\*\*p<0.001, \*\*\*\*p<0.0001. Two-tailed  
829 unpaired Mann-Whitney' s U test. e, Longitudinal intravial imaging of 2 weeks CT2A  
830 glioma of Csf1r-Mer2.CremTmG and Csf1r-Mer2.CremTmG :: BMWT mice. White  
831 arrows, CLECs. Scale bar: 50  $\mu$ m.

832 **Fig. 4: Dual recombination lineage tracing and inducible depletion model identifies**  
833 **a role for CLECs in tumour blood vessel patterning supporting glioma growth.** a,  
834 Cdh5-Dre: Csf1r-Mer2.Cre: RSR-LSL-tdTomato (DreMer2.CretdTomato): a genetic  
835 mouse model for CLEC selective tracing by dual recombination. b-c, Analysis in  
836 DreMer2.CretdTomato. b, Longitudinal intravital imaging of the tumour vasculature in 3  
837 weeks CT2A mouse glioma by Intravenous injection of FITC dextran. Yellow  
838 arrowheads, CLECs. Scale bar: 50  $\mu$ m. c, ERG antibody counterstaining on PFA-fixed  
839 sections of 3 weeks CT2A glioma. Yellow arrows, CLECs. Scale bar: 50  $\mu$ m. d, Cdh5-  
840 Dre: Csf1r-Mer2.Cre: RSR-mTmG-DTR (DreMer2.CremTmG-DTR): a genetic mouse  
841 model for CLEC selective tracing and inducible ablation. DTR, diphtheria toxin receptor.  
842 e-m, Analysis in DreMer2.CremTmG-DTR. e, Longitudinal intravital imaging of the  
843 tumour vasculature in 3 weeks CT2A mouse glioma. Mer2.CremTmG, Csf1r-  
844 Mer2.CremTmG. Yellow arrowheads, CLECs. f, Timing schedule of glioma implantation,  
845 tamoxifen induction and diphtheria toxin (DT) treatment. g, Gross appearance of 3 weeks

846 CT2A gliomas. Scale bar: 5 mm. h, Confocal images of PFA-fixed 3 weeks CT2A glioma  
847 sections. Yellow arrows, CLECs. Scale bar: 50  $\mu$ m. i, Tumour weight at 3 weeks CT2A  
848 glioma. j-l, Analysis of PFA-fixed 3 weeks CT2A glioma sections. j, Tumour blood  
849 vessels area. k, Network length of tumour blood vessels. l, Number of bifurcations of  
850 tumour blood vessels. Bars represent mean  $\pm$  s.d. \* $p$ <0.05, \*\* $p$ <0.01. Two-tailed unpaired  
851 Mann-Whitney's U test.

852 **Fig. 5: Single-cell analysis identifies a unique signature that defines the tumour**  
853 **CLECs.** a-d, Single-cell RNA sequencing (scRNA-seq) analysis of tumour macrophages  
854 (T\_MACs: CD45+GFP+, 79 cells), tumour endothelial cell (T\_ECs: CD45-CD31+GFP-,  
855 78 cells), tumour CLECs (T\_CLECs: CD45-CD31+GFP+, 141 cells) in 4 weeks CT2A  
856 glioma of Csf1r-Mer2.CremTmG mice. b, Gene expression of typical endothelial cell  
857 markers, macrophages and myeloid cell markers. c, Csf1r gene expression. d, Three  
858 characteristic genes expressed in T\_CLECs. e, Enrichment of Tip-cell signature in  
859 T\_CLECs compared to T\_ECs as shown by GSEA. f-k, Analysis of scRNA-seq data of  
860 human endothelial cells from multiple primary tumours. f, UMAP plot of human  
861 endothelial cell subtypes. g, UMAP plot of human endothelial cells colour-coded for the  
862 tumour type of origins. h, UMAP plots with marker gene expression for each EC subtype.  
863 i, Heatmap of marker gene expression for each EC phenotype (each cell as a column and  
864 each gene as a row). j-k, AUCCell analysis of 24 T\_CLECs markers. j, T\_CLECs  
865 subpopulation indicated (AUC>0.165) by red colored dots. k, Cell type-specific (left) and  
866 tumour type-specific (right) populations of T\_CLECs. BCC, basal cell carcinoma; PDAC,  
867 pancreatic ductal adenocarcinoma.

868 **Fig. 6: CLECs are linked to Prox1-positive lymphatic endothelium of the**  
869 **subcapsular sinus floor in lymph nodes.** a, Fluorescent images of the indicated organs

870 of Csf1r-Mer2.CremTmG mice after multiple tamoxifen induction. Scale bar: 50  $\mu$ m. b,  
871 Quantification of the population of CLECs in Csf1r-Mer2.CremTmG mice by flow  
872 cytometric analysis. Of the endothelial cell population (CD45-CD31+),  $9.8 \pm 2.1\%$  GFP-  
873 positive cells are found in the axillary lymph node of Csf1r-Mer2.CremTmG mice (n=  
874 10). c, Counterstaining on PFA-fixed Inguinal lymph node of Csf1r-Mer2.CremTmG::  
875 BMWT mice using PROX1 antibody within 24 hours after tamoxifen induction. Yellow  
876 arrowheads, GFP+tdTomato+PROX1+ cells in the floor of the subcapsular sinus. Scale  
877 bar 25  $\mu$ m. d, Fluorescent images of PROX1 antibody counterstaining on PFA-fixed  
878 inguinal lymph node of Csf1r-Mer2.CremTmG::BMWT mice after multiple rounds of  
879 tamoxifen induction. Scale bar: 100  $\mu$ m. Detailed image of square outlined in d. Yellow  
880 arrowheads, GFP+Prox1+ cells; blue arrowheads, GFP+Prox1- cells. h-k, Analysis of  
881 CT2A glioma in Prox1-CreERT2mTmG mice.

882 **Fig. 7: CLEC and EC heterogeneity in tumor and lymph node.** a, Quality measures  
883 of 4 SMARTseq2 scRNA-seq. libraries: Csf1r-lineage endothelial cells (CLECs) and  
884 endothelial cells (ECs) isolated from tumor (T\_) and lymph node (LN\_). b, Violin plots  
885 show GFP expression per single cell. c, Uniform manifold approximation and projection  
886 (UMAP) of T\_CLECs, T\_EC, LN\_CLECs, LN\_EC. d, Heatmap shows the 20 most  
887 characteristic markers per cell population. e, UMAP colored by gene expression diversity  
888 (CytoTRACE score) and predicted ordering by CytoTRACE. f, Monocle based trajectory  
889 analysis of four cell populations, colored by pseudotime and CytoTRACE score.

890 **Extended Data Fig. 1: CLECs in mouse glioma express endothelial cell markers, but**  
891 **lack macrophage and myeloid cell markers.** Counterstaining on PFA-fixed 4 weeks  
892 CT2A glioma sections of Csf1r-Mer2.CremTmG with indicated antibodies. Lower panels

893 show the detail images of outlined squares in upper panels. Yellow arrowheads, CLECs;  
894 blue arrowheads, macrophages. Scale bar: 25  $\mu$ m.

895 **Extended Data Fig. 2: CLECs contribute to lymphatic endothelium in the tumour**  
896 **environment.** Fluorescent images of counterstaining on PFA-fixed section of day 12  
897 B16F1 melanoma under ear skin of Csf1r-Mer2.CremTmG mice using LYVE1 antibody.  
898 Lower panel indicates detail image of yellow outlined square in upper panel. Yellow  
899 arrow heads, CLECs. Scale bar: 100  $\mu$ m.

900 **Extended Data Fig. 3: Reconstitution rate in bone marrow chimeras.** Reconstitution  
901 rate was determined in peripheral blood 8 weeks after bone marrow transplantation.  
902 TdTomato-positive cells in blood of: C57BL/6J ( $0.3 \pm 0.1\%$ , n= 6), Csf1r-  
903 Mer2.CremTmG ( $99.2 \pm 0.5\%$ , n= 7), BMCsf1r-Mer2.CremTmG ( $97.3 \pm 1.6\%$ , n= 13).  
904 Bars represent mean  $\pm$  s.d. \*\*\*\*p<0.0001. Two-tailed unpaired Mann-Whitney' s U test.

905 **Extended Data Fig. 4: CLECs do not originate from spleen.** Surgical removal of  
906 spleen (splenectomy) was performed 3 weeks before glioma injection. CLECs isolated  
907 from CT2A glioma of sham control Csf1r-Mer2.CremTmG mice (n= 5) constitute  $1.5 \pm$   
908  $0.8\%$  of total tumour endothelial cell population, compared to  $1.5 \pm 0.5\%$  found in Csf1r-  
909 Mer2.CremTmG with splenectomy (n= 4). Bars represent mean  $\pm$  s.d. Two-tailed  
910 unpaired Mann-Whitney' s U test.

911 **Extended Data Fig. 5: CLECs locate at peripheral area of mouse glioma.** a,  
912 Vibratome section (200  $\mu$ m-thick) of 4 weeks CT2A glioma of Csf1r-Mer2.CremTmG::  
913 BMWT mice. Scale bar: 1 mm. b, Fluorescent images of area outlined in a. Yellow  
914 arrowheads, CLECs. Scale bar: 100  $\mu$ m.

915 **Extended Data Fig. 6: 24 tumour CLECs markers in mouse glioma.** SCDE analysis  
916 of scRNA-seq data of tumour macrophages (T\_MACs: CD45+GFP+, n= 79), tumour  
917 endothelial cells (T\_EC: CD45-CD31+GFP-, n= 78), tumour CLECs (T\_CLECs: CD45-  
918 CD31+GFP+, n= 141) in 4 weeks CT2A glioma in Csf1r-Mer2.CremTmG mice. Bars  
919 represent mean  $\pm$  s.d. \*p<0.05, \*\*p<0.01, \*\*\*p<0.001, \*\*\*\*p<0.0001. Two-tailed  
920 unpaired t-test with Welch correction.

921 **Extended Data Fig. 7: CLECs in glioma express AQP1.** Counterstaining on PFA-fixed  
922 CT2A glioma of Csf1r-Mer2.CremTmG::BMWT mice using AQP1 antibody. Yellow  
923 arrowheads, T\_CLECs; blue arrowheads, T\_EC. Scale bar: 25  $\mu$ m.

924 **Extended Data Fig. 8: CLECs in glioma cannot be labelled by GFP within 24 hours**  
925 **after tamoxifen induction.** a-b, Tamoxifen induction timing. b, Quantification of the  
926 population of tumour macrophages (T\_MACs: CD45+GFP+) and tumour CLECs  
927 (T\_CLECs: CD45-CD31+GFP+) by flow cytometric analysis in tumour samples (n=4).  
928 Bars represent mean  $\pm$  s.d. c, Fluorescent images of PFA-fixed 3 weeks CT2A glioma de  
929 of Csf1r-Mer2.CremTmG mice within 24 hours after tamoxifen induction. Scale bar: 100  
930  $\mu$ m.

931 **Extended Data Fig. 9: CLEC and EC heterogeneity in tumor and lymph node .**  
932 a, Heatmap shows the expression of n=91 fLECs markers in LN\_CLEC, LN\_EC,  
933 T\_CLEC and T\_EC single cells. b, Violin plots show the expression of 3 CLEC markers:  
934 Pde4d, Robo1 and Itga9.

935 **Supplemental Movie 1: Time-lapse *in vivo* imaging of Csf1r lineage endothelial tip**  
936 **cell in CT2A glioma of Csf1r-Mer2.Cre<sup>mTmG</sup> mice.** Imaging was performed over 4 hours  
937 (1 frame/ 10 min).

938

939 **Supplemental Movie 2: Time-lapse *in vivo* imaging of *Csflr* lineage endothelial tip**  
940 **cell in CT2A glioma of *Csflr-Mer2.Cre<sup>mTmG</sup>::BM<sup>WT</sup>*.** Imaging was performed over 50  
941 minutes (1 frame/ 2.5 min).

942

943 **Supplemental Table 1: Details of gene expression analysis.** Seurat based differential  
944 analysis (non-parameteric Wilcoxon rank sum test) was performed by comparing cell  
945 types amongst each other (green columns) and the different Seurat clusters (yellow  
946 columns). p\_val: p\_val (unadjusted). avg\_logFC: log fold-change of the average  
947 expression between the two groups. Positive values indicate that the feature is more  
948 highly expressed in the first group. pct.1: The percentage of cells where the feature is  
949 detected in the first group. pct.2: The percentage of cells where the feature is detected in  
950 the second group. p\_val\_adj: Adjusted p-value, based on Bonferroni correction using all  
951 features in the dataset.

952

953 **Supplemental Table 2: Marker genes for EC subtypes of multiple tumour types.**  
954 p\_val: p\_val (unadjusted). avg\_logFC: Average log (fold change). pct.1: Percentage of  
955 expressed cells in current cluster. pct.2: Percentage of expressed cells in other cluster.  
956 p\_val\_adj: Adjusted p-value. cluster: Cluster name. gene: Gene name. log2fc: log<sub>2</sub> (fold  
957 change). Log2pct: log<sub>2</sub> ((pct+0.005)/(pct2+0.005)).

958



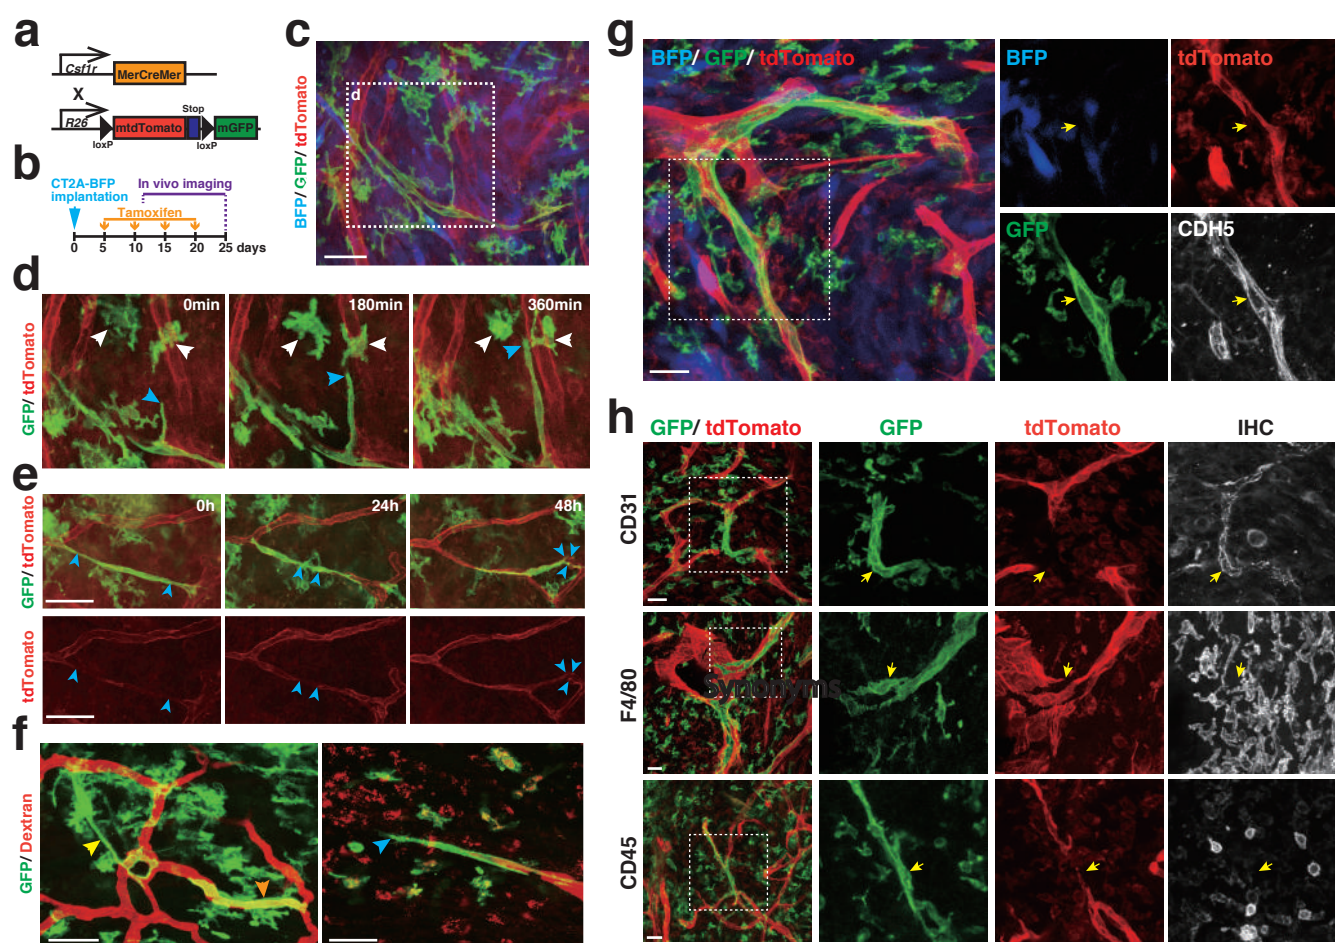

**Fig. 1: *Csf1r* lineage endothelial cells (CLECs) contribute to perfused, dynamically sprouting and remodeling blood vessels in mouse glioma.** a, *Csf1r-Mer2.Cre<sup>mTmG</sup>*: a mouse model for *Csf1r*-lineage tracing combining the tamoxifen-inducible Cre-driver under control of the *Csf1r*-promoter and the *mTmG* Cre-reporter. b, Timing schedule of glioma implantation, tamoxifen induction and in vivo imaging. c-f, Longitudinal intravital imaging of the tumour vasculature in CT2A mouse glioma of *Csf1r-Mer2.Cre<sup>mTmG</sup>* by cranial window. Scale bar: 50  $\mu$ m. c, In vivo imaging in 3 weeks glioma. Endothelial cells in red (tdTomato), *Csf1r*-labeled cells in green (GFP) and glioma cells in blue (BFP). d, Detail image of outlined square in Fig. 1c illustrating tracing of GFP-positive cells. White arrowheads, macrophages; blue arrowhead, CLECs at tip position. e, In vivo imaging of CLECs in 2 weeks glioma. Blue arrowheads, tip of endothelial cells. f, Visualization of blood vessels in 3 weeks glioma by Intravenous injection of dextran with texas red dye. Yellow arrowhead, bridging CLECs; orange arrowhead, tube formation by CLECs; blue arrowhead, CLECs at tip position. g-h, Counterstaining on PFA-fixed 4 weeks CT2A glioma sections of *Csf1r-Mer2.Cre<sup>mTmG</sup>* with indicated antibodies. Yellow arrows, CLECs. Scale bar: 25  $\mu$ m.



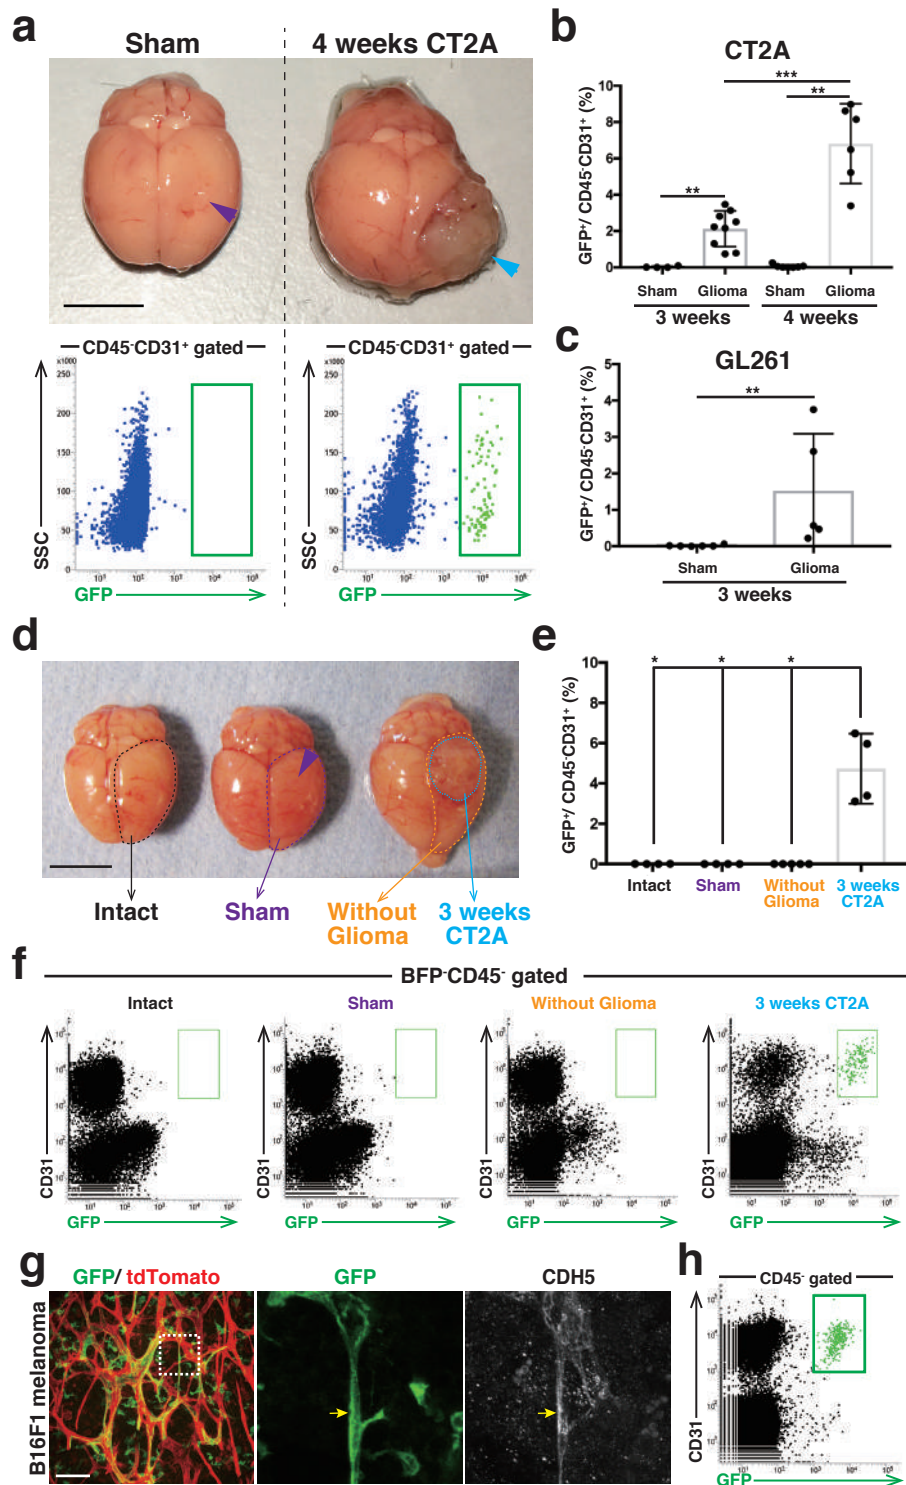

**Fig. 2: Up to 10% of intra-tumour endothelium is comprised of CLECs not only in glioma, but also in other tumour types and locations.** a-f, Quantification of the population of CLECs in glioma of *Csf1r-Mer2.Cre<sup>TM6G</sup>* mice. a, Gross appearance of sham control and 4 weeks CT2A glioma (Upper panel). Purple arrowhead, the area of capillary injection; blue arrowhead, glioma. Scale bar: 5 mm. Flow cytometric analysis of CLECs in sham control and 4 weeks CT2A glioma (Lower panel). b, In 3 weeks CT2A glioma (n= 9), CLECs constitute  $2.1 \pm 1.0\%$  of total endothelial cells (CD45-CD31+); in 4 weeks CT2A glioma (n= 5), they make up  $7.5 \pm 1.6\%$  of total endothelial cells. c, In 3 weeks GL261 glioma (n= 5), CLECs constitute  $1.5 \pm 1.6\%$  of total endothelial cells. d, Gross appearance of normal brain, sham control and 3 weeks CT2A glioma. Purple arrowhead, area of capillary injection. Scale bar: 5 mm. e-f, Quantification of the population of CLECs by flow cytometric analysis in brain and tumour samples. Bars represent mean  $\pm$  s.d. \*P<0.05, \*\*P<0.01, \*\*\*P<0.001, \*\*\*\*P<0.0001. Two-tailed unpaired Mann-Whitney's U test. g-h, Analysis of CLECs in B16F1 melanoma in *Csf1r-Mer2.Cre<sup>TM6G</sup>* mice. g, Counterstaining on PFA-fixed section of day12 melanoma with CDH5 antibody. Yellow arrows, CLECs. Scale bar: 50  $\mu$ m. h, CLECs constitute  $2.8 \pm 0.75\%$  of total endothelial cells in day 12 melanoma (n=4).

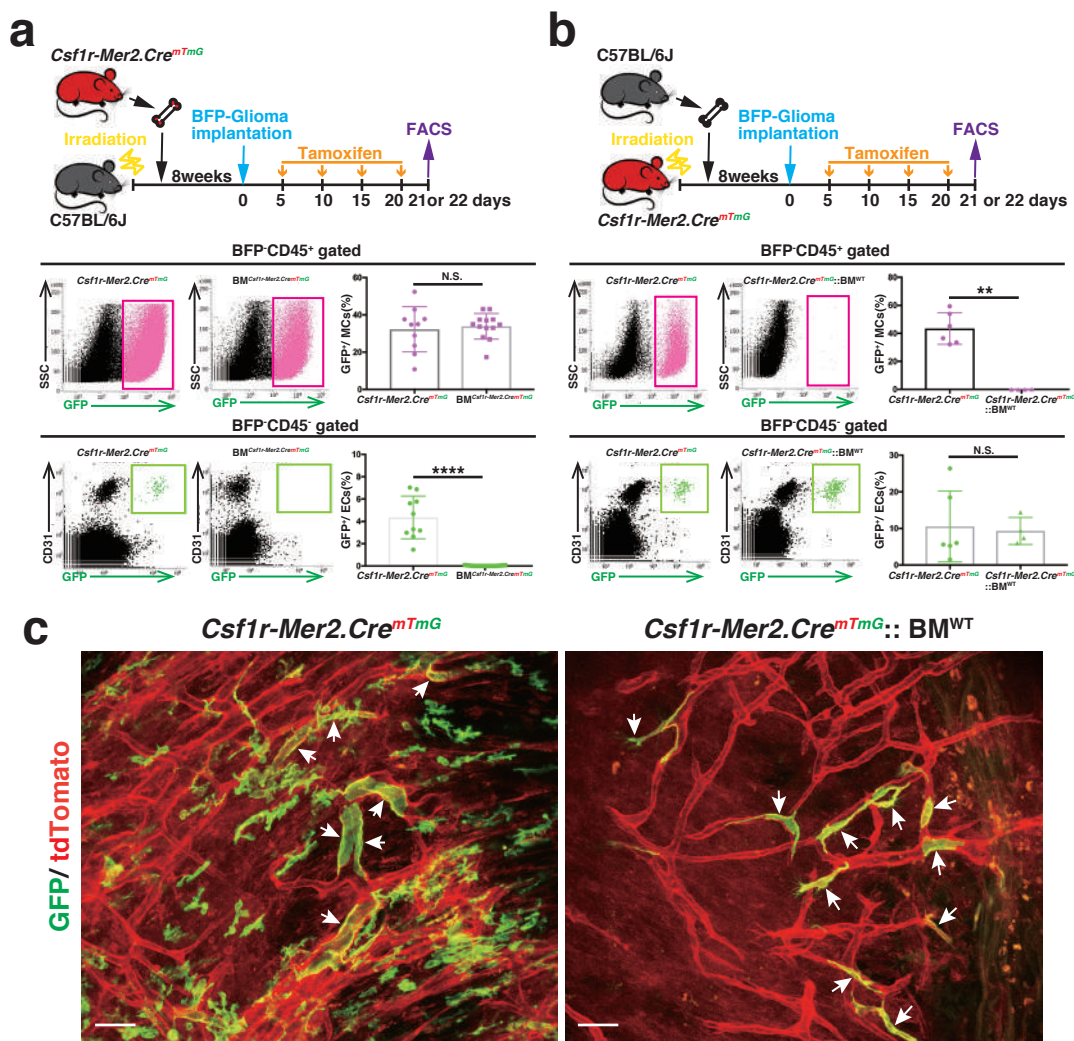

**Fig. 3: CLECs do not originate from bone marrow.** a-b, Flow cytometric analysis of CT2A-glioma in bone marrow chimeras. a, *BM<sup>Csf1r-mer2.CremTmG</sup>*: C57BL/6J mice are used as recipients and *Csf1r-Mer2.Cre<sup>mTmG</sup>* mice used as donors. Within the sorted myeloid cell population (BFP-CD45<sup>+</sup>), 32.3 ± 12.1% are GFP-positive in *Csf1r-Mer2.Cre<sup>mTmG</sup>* mice (n= 10), and 33.8 ± 6.9% are GFP-positive in bone-marrow transplanted *BM<sup>Csf1r-Mer2.CremTmG</sup>* mice (n= 12). Among endothelial cell population (BFP-CD45<sup>+</sup>CD31<sup>+</sup>), 4.3 ± 1.9% are GFP-positive in *Csf1r-Mer2.Cre<sup>mTmG</sup>* mice (n= 10), whereas no GFP-positive endothelial cells are found in *BM<sup>Csf1r-Mer2.CremTmG</sup>* mice (n= 12). b, *Csf1r-Mer2.Cre<sup>mTmG</sup>::BM<sup>WT</sup>*: *Csf1r-Mer2.Cre<sup>mTmG</sup>* are used as recipients and C57BL/6J as donors. Of the sorted myeloid cell population, 43.4 ± 11.3% GFP-positive cells are found in *Csf1r-Mer2.Cre<sup>mTmG</sup>* mice (n= 6), whereas 0.1 ± 0.1% GFP-positive cells are found in *Csf1r-Mer2.Cre<sup>mTmG</sup>::BM<sup>WT</sup>* mice (n= 4). Of the endothelial cell population, 10.5 ± 9.7% GFP-positive cells are found in *Csf1r-Mer2.Cre<sup>mTmG</sup>* mice (n= 6), and 9.3 ± 3.7% GFP-positive cells are found in *Csf1r-Mer2.Cre<sup>mTmG</sup>::BM<sup>WT</sup>* mice (n= 4). Bars represent mean ± s.d. \*P<0.05, \*\*P<0.01, \*\*\*P<0.001, \*\*\*\*P<0.0001. Two-tailed unpaired Mann-Whitney' s U test. c, Longitudinal intravital imaging of 2 weeks CT2A glioma of *Csf1r-Mer2.Cre<sup>mTmG</sup>* and *Csf1r-Mer2.Cre<sup>mTmG</sup>::BM<sup>WT</sup>* mice. White arrows, CLECs. Scale bar: 50  $\mu$ m.

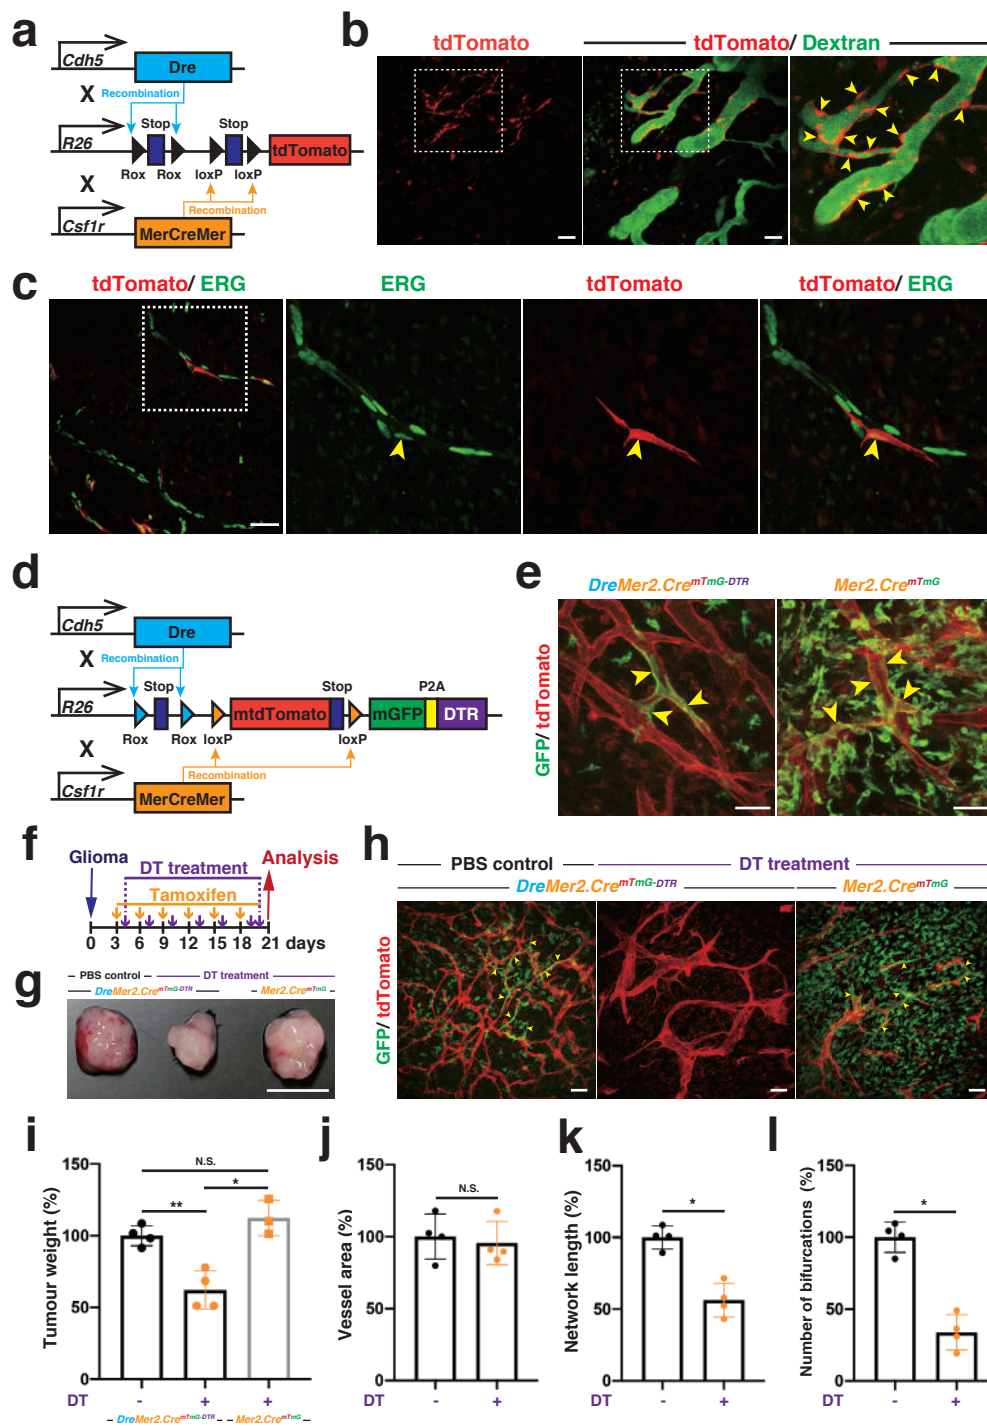

**Fig. 4: Dual recombination lineage tracing and inducible depletion model identifies a role for CLECs in tumour blood vessel patterning supporting glioma growth.** a, *Cdh5-Dre: Csf1r-Mer2.Cre: RSR-LSL-tdTomato (DreMer2.Cre<sup>tdTomato</sup>)*: a genetic mouse model for CLEC selective tracing by dual recombination. b-c, Analysis in *DreMer2.Cre<sup>tdTomato</sup>*. b, Longitudinal intravital imaging of the tumour vasculature in 3 weeks CT2A mouse glioma by Intravenous injection of FITC dextran. Yellow arrowheads, CLECs. Scale bar: 50  $\mu$ m. c, ERG antibody counterstaining on PFA-fixed sections of 3 weeks CT2A glioma. Yellow arrows, CLECs. Scale bar: 50  $\mu$ m. d, *Cdh5-Dre: Csf1r-Mer2.Cre: RSR-mTmG-DTR (DreMer2.Cre<sup>mTmG-DTR</sup>)*: a genetic mouse model for CLEC selective tracing and inducible ablation. DTR, diphtheria toxin receptor. e-l, Analysis in *DreMer2.Cre<sup>mTmG-DTR</sup>*. e, Longitudinal intravital imaging of the tumour vasculature in 3 weeks CT2A mouse glioma. *Mer2.Cre<sup>mTmG</sup>, Csf1r-Mer2.Cre<sup>mTmG</sup>*. Yellow arrowheads, CLECs. f, Timing schedule of glioma implantation, tamoxifen induction and diphtheria toxin (DT) treatment. g, Gross appearance of 3 weeks CT2A gliomas. Scale bar: 5 mm. h, Confocal images of PFA-fixed 3 weeks CT2A glioma sections. Yellow arrows, CLECs. Scale bar: 50  $\mu$ m. i, Tumour weight at 3 weeks CT2A glioma. j-l, Analysis of PFA-fixed 3 weeks CT2A glioma sections. j, Tumour blood vessels area. k, Network length of tumour blood vessels. l, Number of bifurcations of tumour blood vessels. Bars represent mean  $\pm$  s.d. \* $P < 0.05$ , \*\* $P < 0.01$ . Two-tailed unpaired Mann-Whitney' s U test.



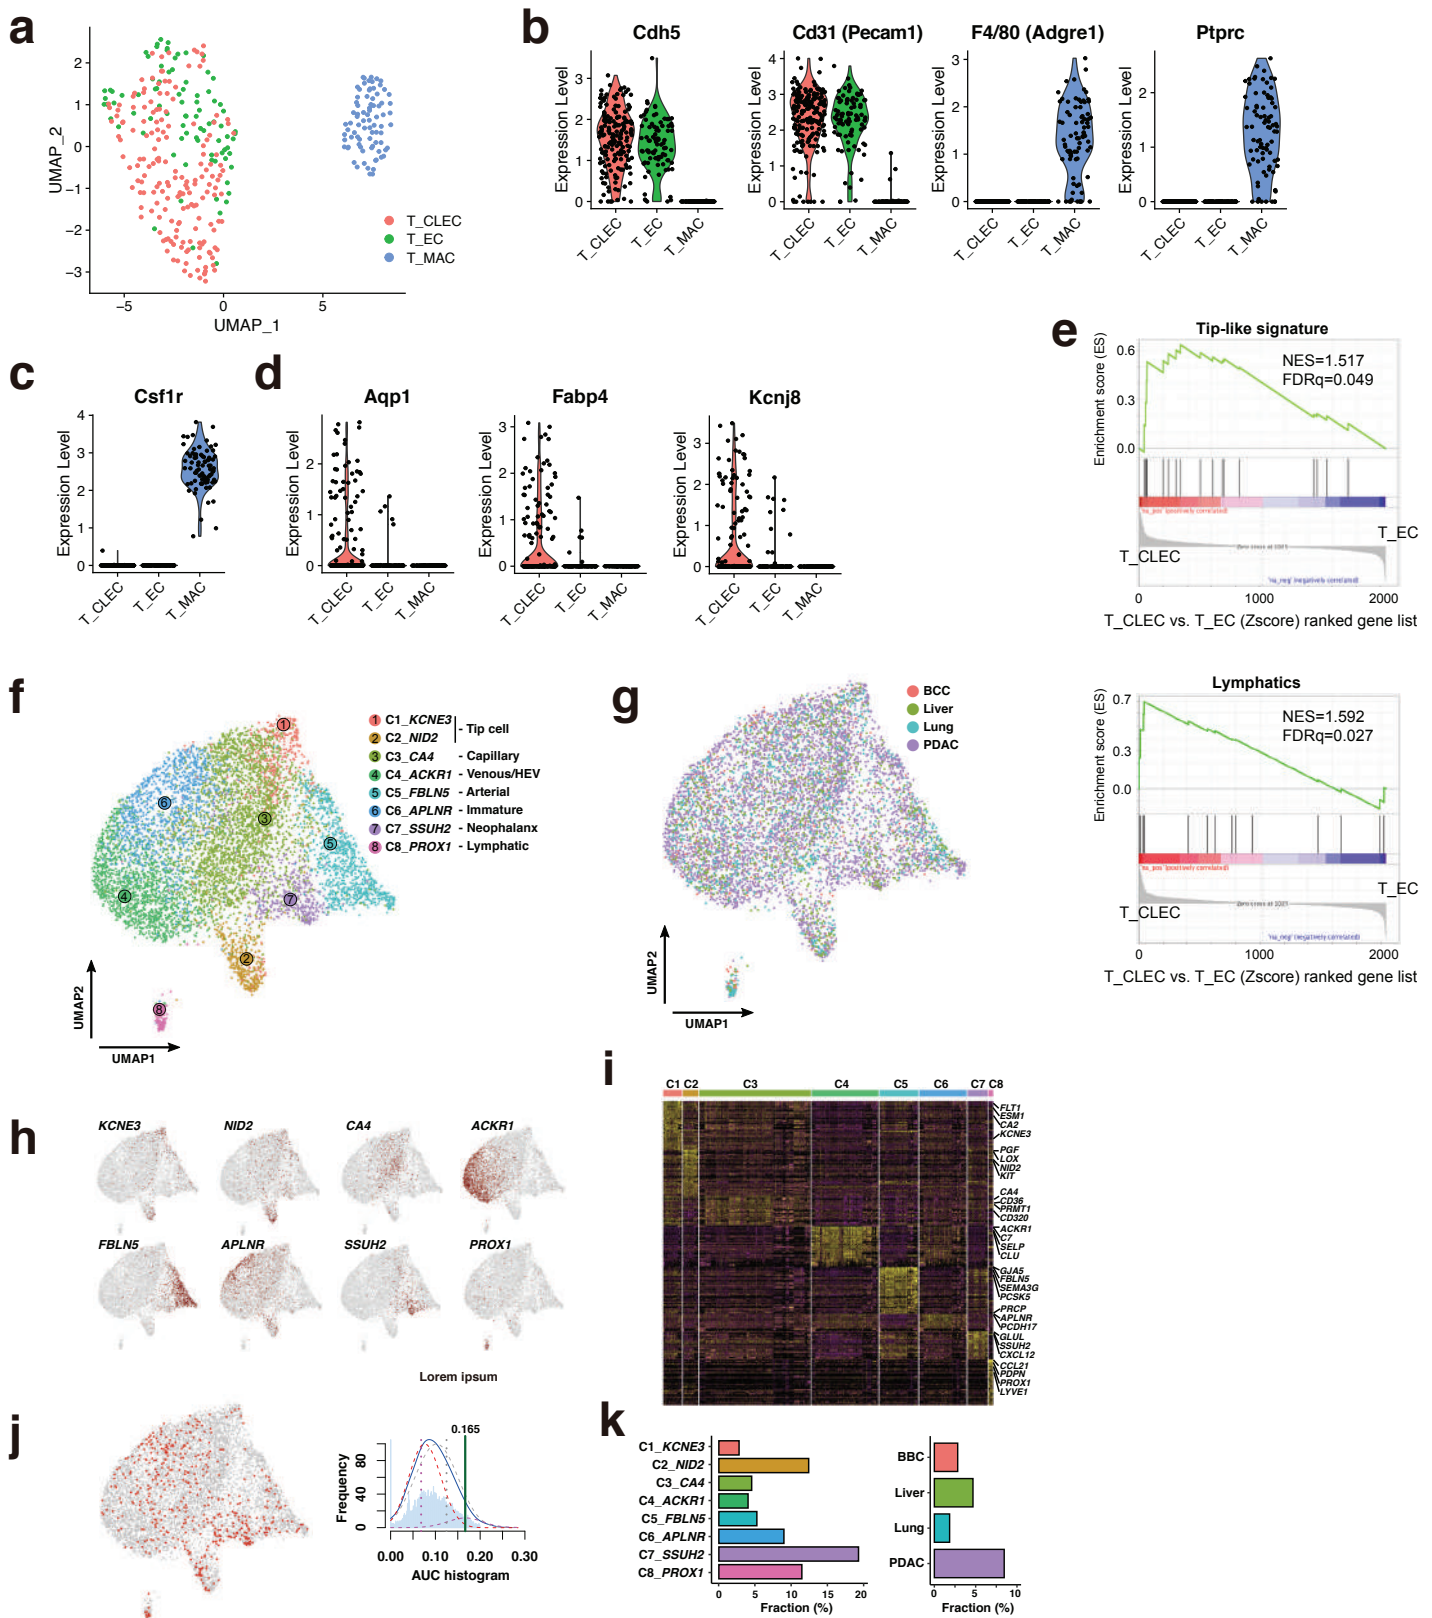

**Fig. 5: Single-cell analysis identifies a unique signature that defines the tumour CLECs.** a-d, Single-cell RNA sequencing (scRNA-seq) analysis of tumour macrophages (T\_MACs: CD45<sup>+</sup>GFP<sup>+</sup>, 79 cells), tumour endothelial cell (T\_EC: CD45<sup>+</sup>CD31<sup>+</sup>GFP<sup>+</sup>, 78 cells), tumour CLECs (T\_CLECs: CD45<sup>+</sup>CD31<sup>+</sup>GFP<sup>+</sup>, 141 cells) in 4 weeks CT2A glioma of *Csf1r-Mer2.Cre<sup>mtmG</sup>* mice. b, Gene expression of typical endothelial cell markers, macrophages and myeloid cell markers. c, *Csf1r* gene expression. d, Three characteristic genes expressed in T\_CLECs. e, Enrichment of Tip-cell and lymphatic signatures in T\_CLECs compared to T\_EC as shown by GSEA. f-k, Analysis of scRNA-seq data of human endothelial cells from multiple primary tumours. f, UMAP plot of human endothelial cell subtypes. g, UMAP plot of human endothelial cells colour-coded for the tumour type of origins. h, UMAP plots with marker gene expression for each EC subtype. i, Heatmap of marker gene expression for each EC phenotype (each cell as a column and each gene as a row). j-k, AUC analysis of 24 T\_CLECs markers. j, T\_CLECs subpopulation indicated (AUC>0.165) by red colored dots. k, Cell type-specific (left) and tumour type-specific (right) populations of T\_CLECs. BCC, basal cell carcinoma; PDAC, pancreatic ductal adenocarcinoma.

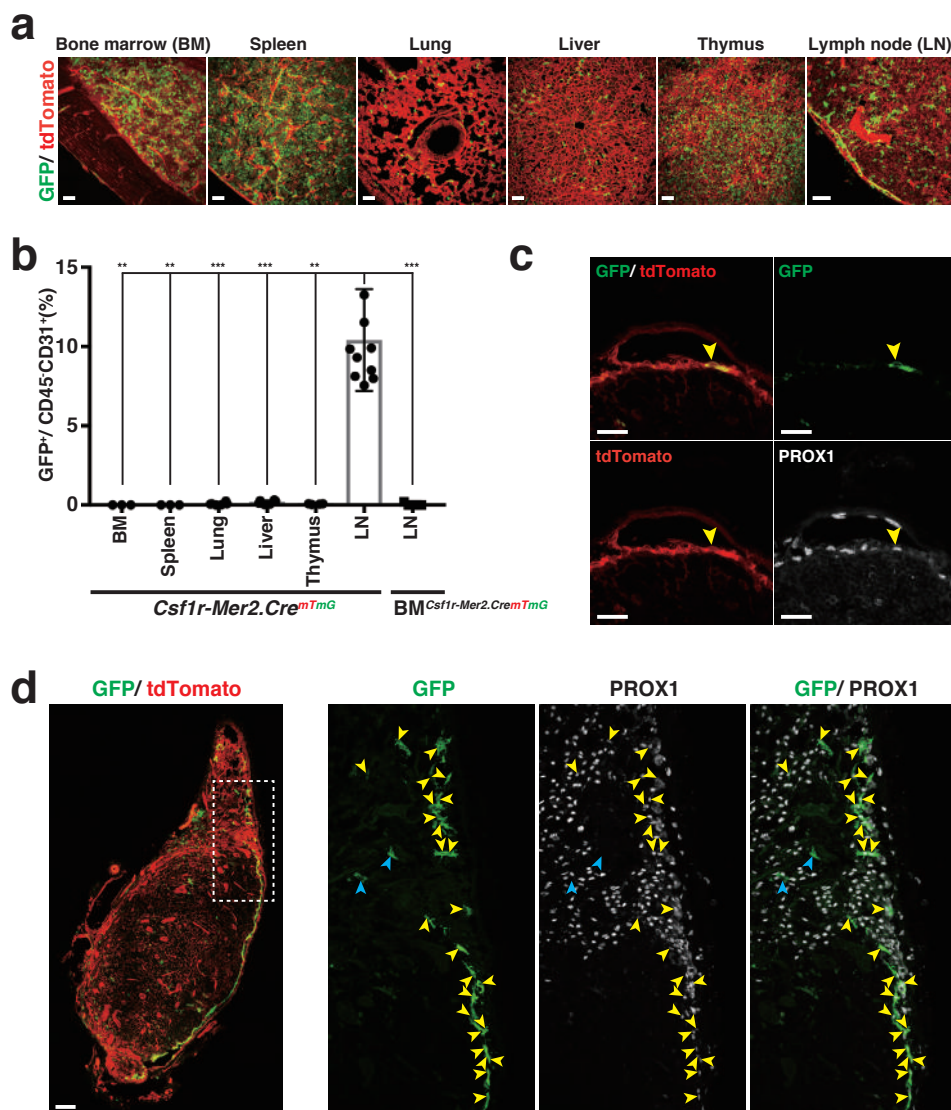

**Fig. 6: CLECs are linked to *Prox1*-positive lymphatic endothelium of the subcapsular sinus floor in lymph nodes.** a, Fluorescent images of the indicated organs of *Csf1r-Mer2.Cre<sup>mTmG</sup>* mice after multiple tamoxifen induction. Scale bar: 50  $\mu$ m. b, Quantification of the population of CLECs in *Csf1r-Mer2.Cre<sup>mTmG</sup>* mice by flow cytometric analysis. Of the endothelial cell population (CD45<sup>+</sup>CD31<sup>+</sup>), 9.8  $\pm$  2.1% GFP-positive cells are found in the axillary lymph node of *Csf1r-Mer2.Cre<sup>mTmG</sup>* mice (n= 10). c, Counterstaining on PFA-fixed Inguinal lymph node of *Csf1r-Mer2.Cre<sup>mTmG</sup>::BM<sup>WT</sup>* mice using PROX1 antibody within 24 hours after tamoxifen induction. Yellow arrowheads, GFP<sup>+</sup>tdTomato<sup>+</sup>PROX1<sup>+</sup> cells in the floor of the subcapsular sinus. Scale bar 25  $\mu$ m. d, Fluorescent images of PROX1 antibody counterstaining on PFA-fixed inguinal lymph node of *Csf1r-Mer2.Cre<sup>mTmG</sup>::BM<sup>WT</sup>* mice after multiple rounds of tamoxifen induction. Scale bar: 100  $\mu$ m. Detailed image of square outlined in d. Yellow arrowheads, GFP<sup>+</sup>Prox1<sup>+</sup> cells; blue arrowheads, GFP<sup>+</sup>Prox1<sup>-</sup> cells.

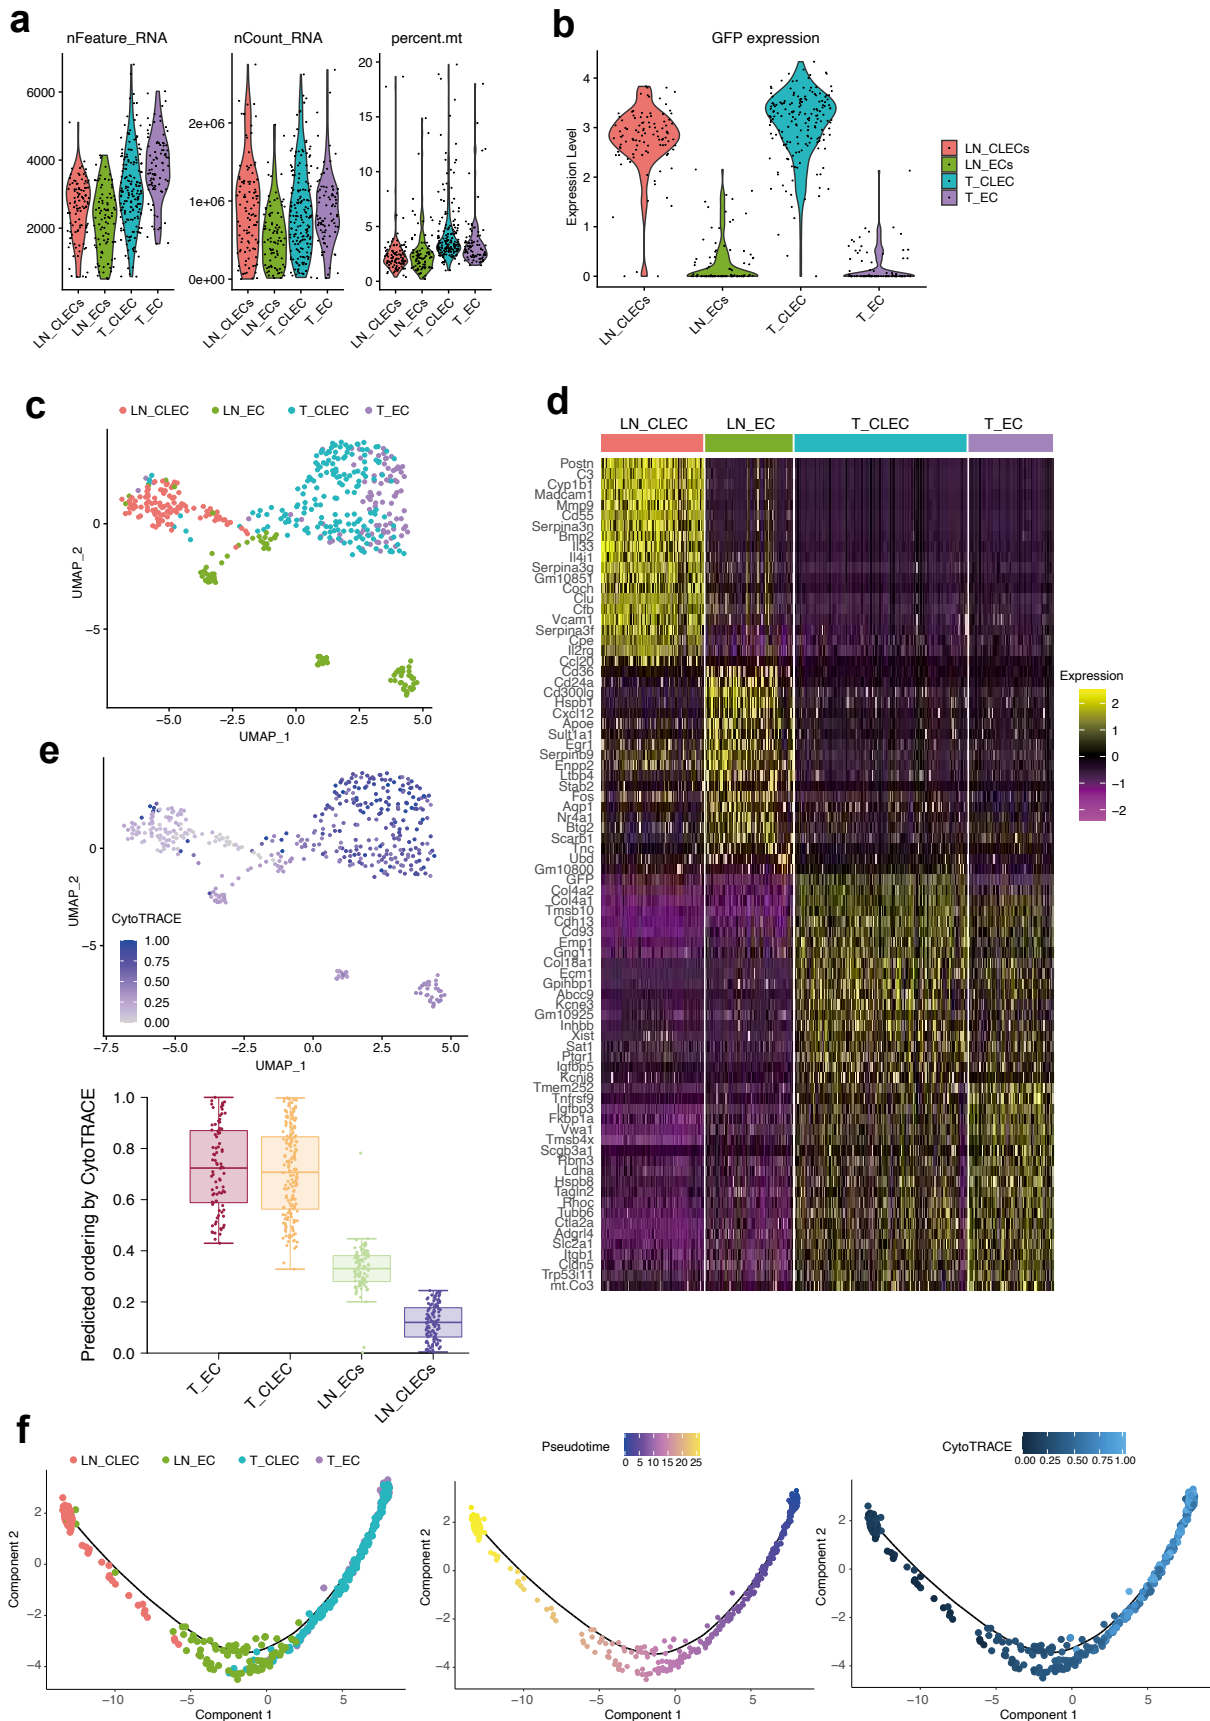

**Fig. 7: CLEC and EC heterogeneity in tumor and lymph node .**

a, Quality measures of 4 SMARTseq2 scRNA-seq libraries: Csf1r-lineage endothelial cells (CLECs) and endothelial cells (ECs) isolated from tumor (T\_) and lymph node (LN\_). b, Violin plots show GFP expression per single cell. c, Uniform manifold approximation and projection (UMAP) of T\_CLECs, T\_EC and LN\_CLECs, LN\_EC. d, Heatmap shows the 20 most characteristic markers per cell population. e, UMAP colored by gene expression diversity (CytoTRACE score) and predicted ordering by CytoTRACE. f, Monocle based trajectory analysis of four cell populations, colored by pseudotime and CytoTRACE score.
