# Supplementary material for: Emerging single cell endothelial heterogeneity supports sprouting tumour angiogenesis and growth
Source: bioRxiv or medRxiv preprint supplement (doi:10.1101/2021.06.09.447719), 2021-06-11
Supplement: Supplementary file [file media-1.pdf]

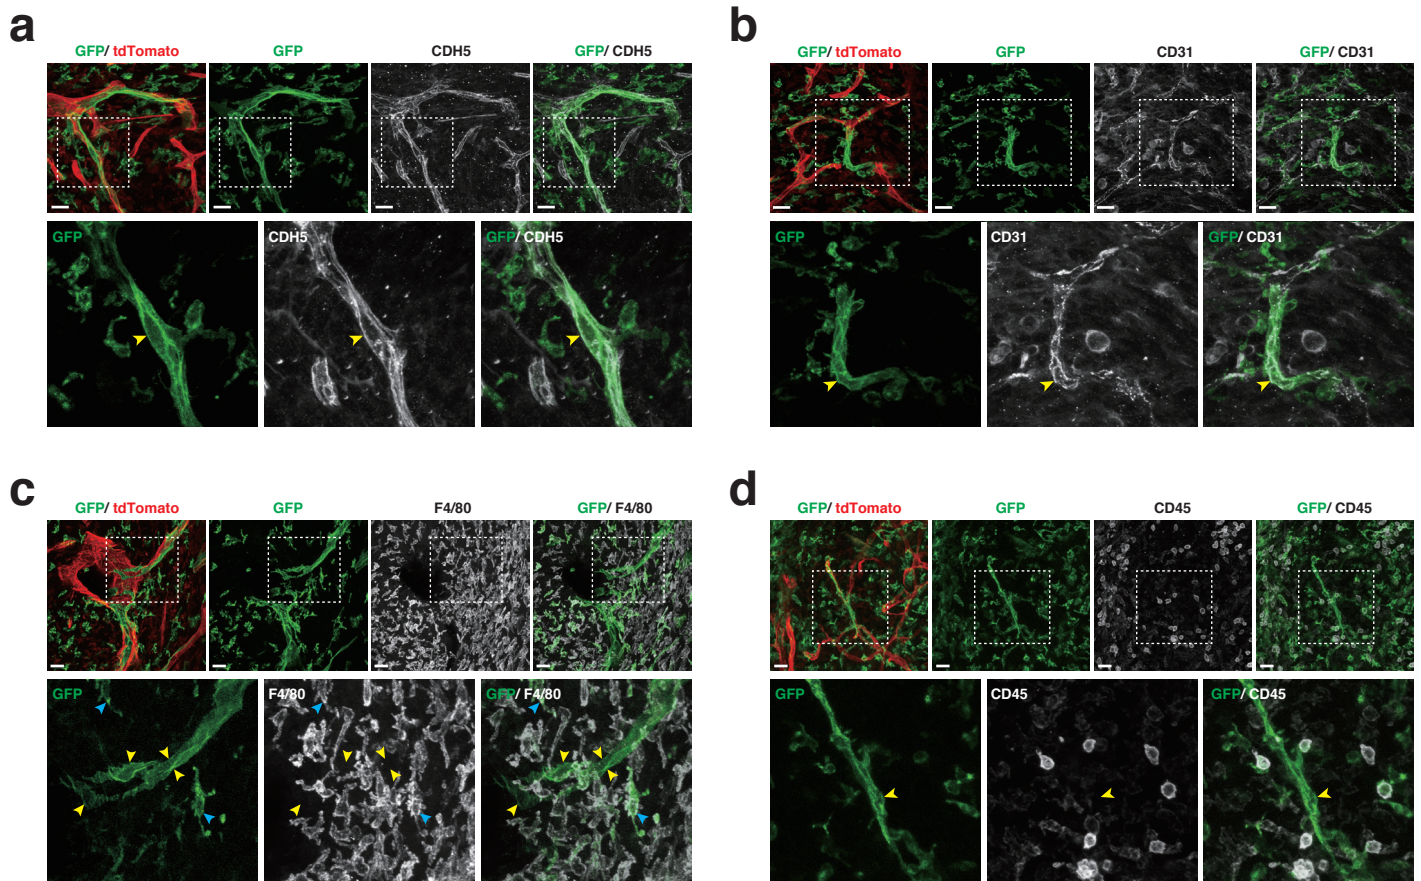

**Extended Data Fig. 1: CLECs in mouse glioma express endothelial cell markers, but lack macrophage and myeloid cell markers.** Counterstaining on PFA-fixed 4 weeks CT2A glioma sections of *Csf1r-Mer2.Cre<sup>mTmG</sup>* with indicated antibodies. Lower panels show the detail images of outlined squares in upper panels. Yellow arrowheads, CLECs; blue arrowheads, macrophages. Scale bar: 25  $\mu$ m.

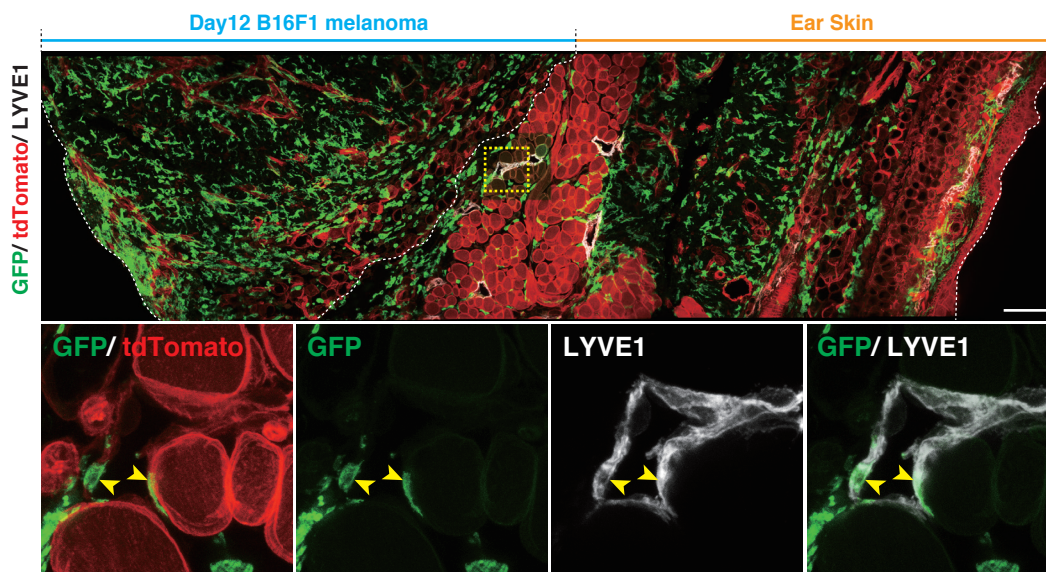

**Extended Data Fig. 2: CLECs contribute to lymphatic endothelium in the tumour environment.**  
 Fluorescent images of counterstaining on PFA-fixed section of day 12 B16F1 melanoma under ear skin of *Csf1r-Mer2.Cre<sup>mTmG</sup>* mice using LYVE1 antibody. Lower panel indicates detail image of yellow outlined square in upper panel. Yellow arrow heads, CLECs. Scale bar: 100  $\mu$ m.

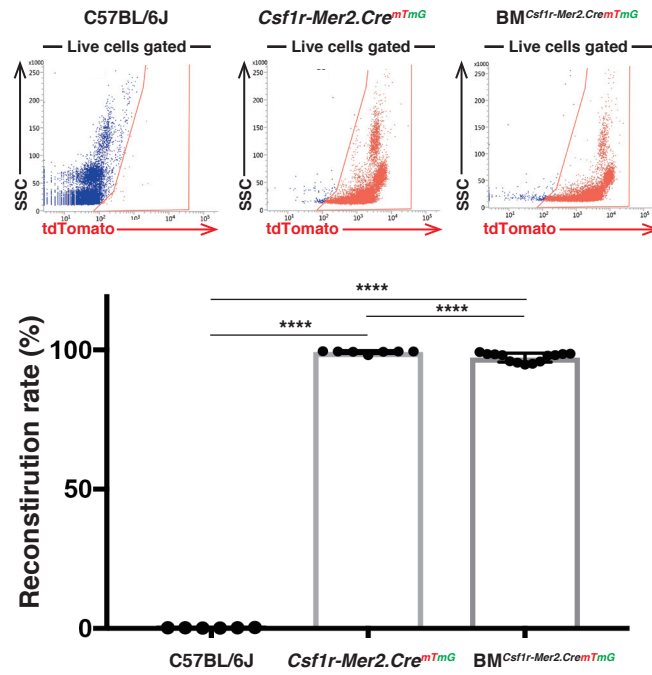

**Extended Data Fig. 3: Reconstitution rate in bone marrow chimeras.** Reconstitution rate was determined in peripheral blood 8 weeks after bone marrow transplantation. TdTomato-positive cells in blood of: C57BL/6J ( $0.3 \pm 0.1\%$ ,  $n=6$ ), *Csf1r-Mer2.Cre<sup>mTmG</sup>* ( $99.2 \pm 0.5\%$ ,  $n=7$ ), *BM<sup>Csf1r-Mer2.CremTmG</sup>* ( $97.3 \pm 1.6\%$ ,  $n=13$ ). Bars represent mean  $\pm$  s.d. \*\*\*\* $P < 0.0001$ . Two-tailed unpaired Mann-Whitney' s U test.

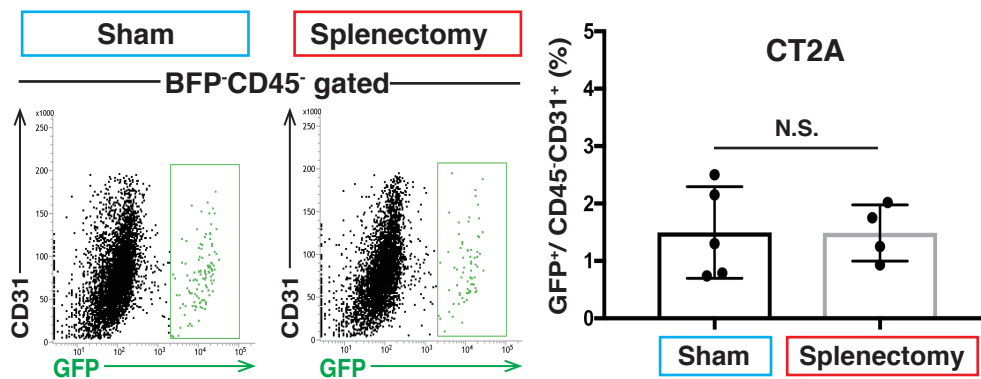

**Extended Data Fig. 4: CLECs do not originate from spleen.** Surgical removal of spleen (splenectomy) was performed 3 weeks before glioma injection. CLECs isolated from CT2A glioma of sham control *Csf1r-Mer2.Cre<sup>mTmG</sup>* mice (n= 5) constitute  $1.5 \pm 0.8$  % of total tumour endothelial cell population, compared to  $1.5 \pm 0.5$ % found in *Csf1r-Mer2.Cre<sup>mTmG</sup>* with splenectomy (n= 4). Bars represent mean  $\pm$  s.d. Two-tailed unpaired Mann-Whitney' s U test.

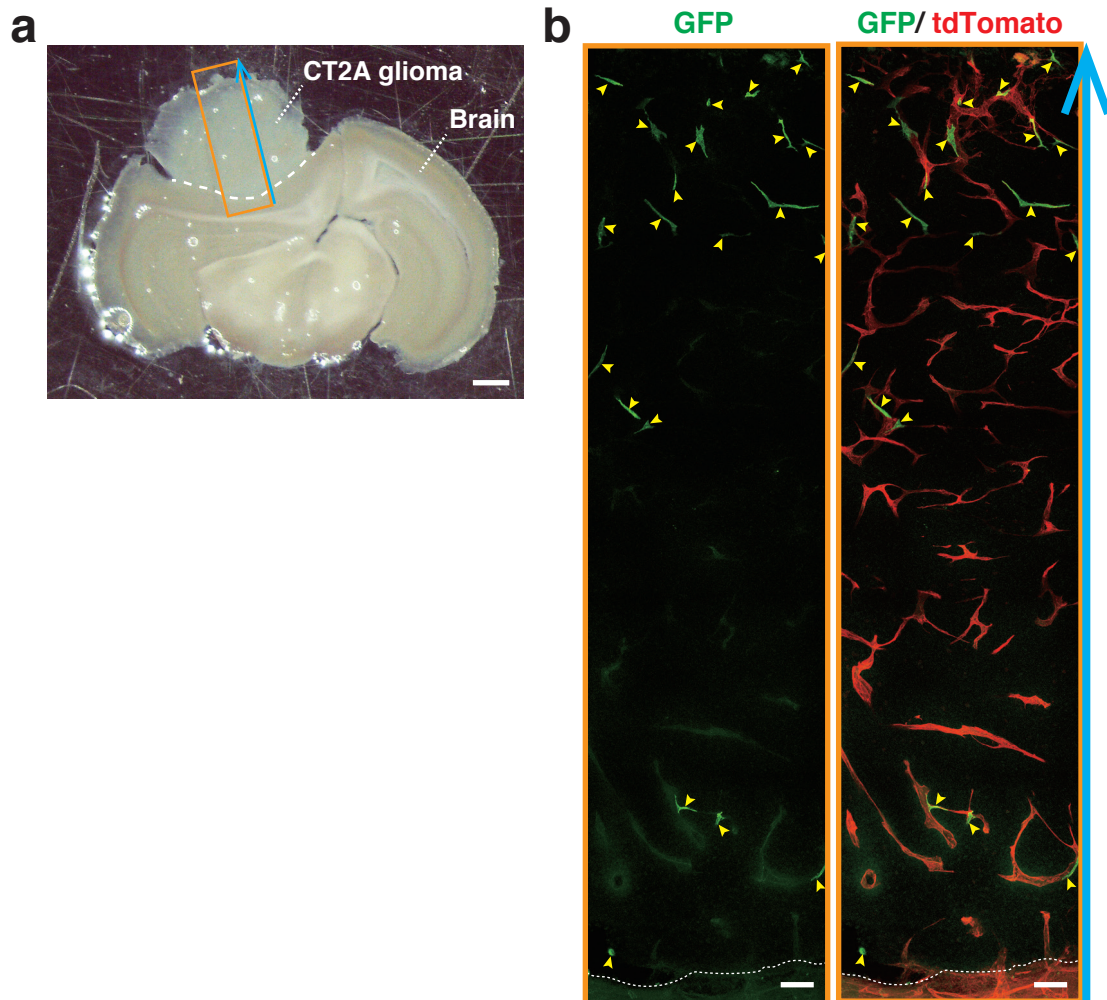

**Extended Data Fig. 5: CLECs locate at peripheral area of mouse glioma.** a, Vibratome section (200  $\mu\text{m}$ -thick) of 4 weeks CT2A glioma of *Csf1r-Mer2.Cre<sup>mTmG</sup>*;  $\text{BM}^{\text{WT}}$  mice. Scale bar: 1 mm. b, Fluorescent images of area outlined in a. Yellow arrowheads, CLECs. Scale bar: 100  $\mu\text{m}$ .

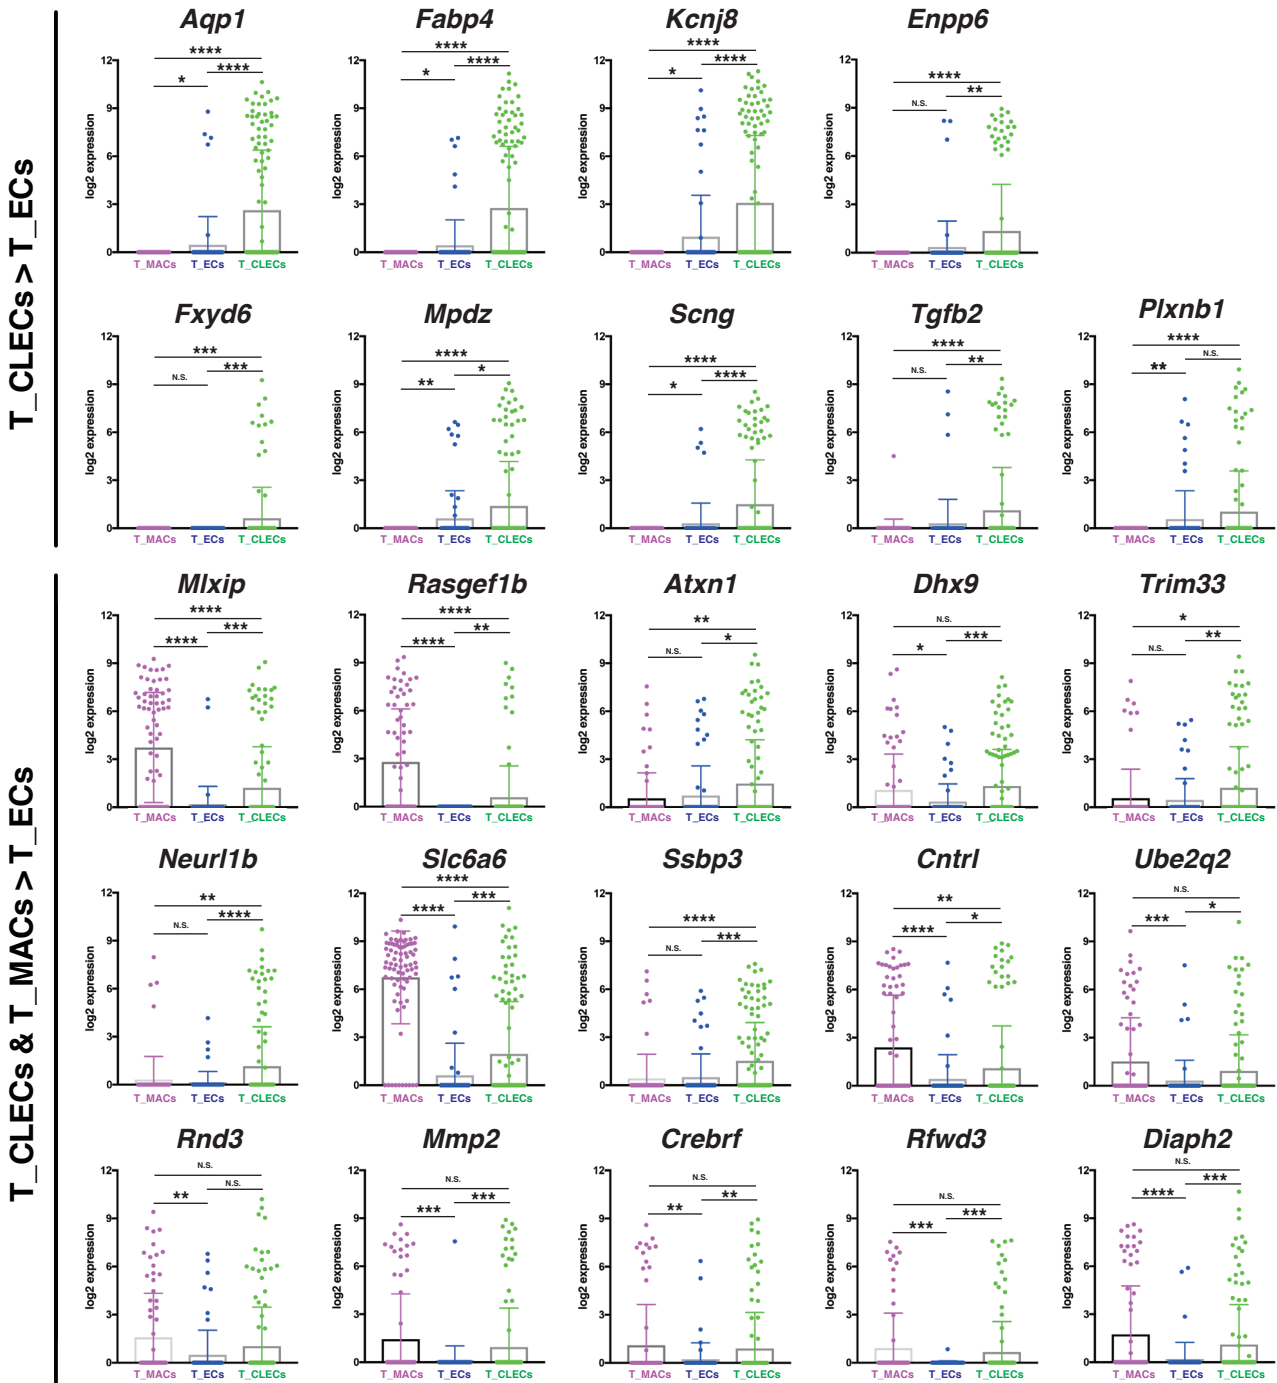

**Extended Data Fig. 6: 24 tumour CLECs markers in mouse glioma.** SCDE analysis of scRNA-seq data of tumour macrophages (T\_MACs: CD45<sup>+</sup>GFP<sup>+</sup>, n= 79), tumour endothelial cells (T\_EC: CD45<sup>+</sup>CD31<sup>+</sup>GFP<sup>+</sup>, n= 78), tumour CLECs (T\_CLECs: CD45<sup>+</sup>CD31<sup>+</sup>GFP<sup>+</sup>, n= 141) in 4 weeks CT2A glioma in *Csf1r-Mer2.Cre<sup>mTmG</sup>* mice. Bars represent mean  $\pm$  s.d. \*P<0.05, \*\*P<0.01, \*\*\*P<0.001, \*\*\*\*P<0.0001. Two-tailed unpaired t-test with Welch correction.

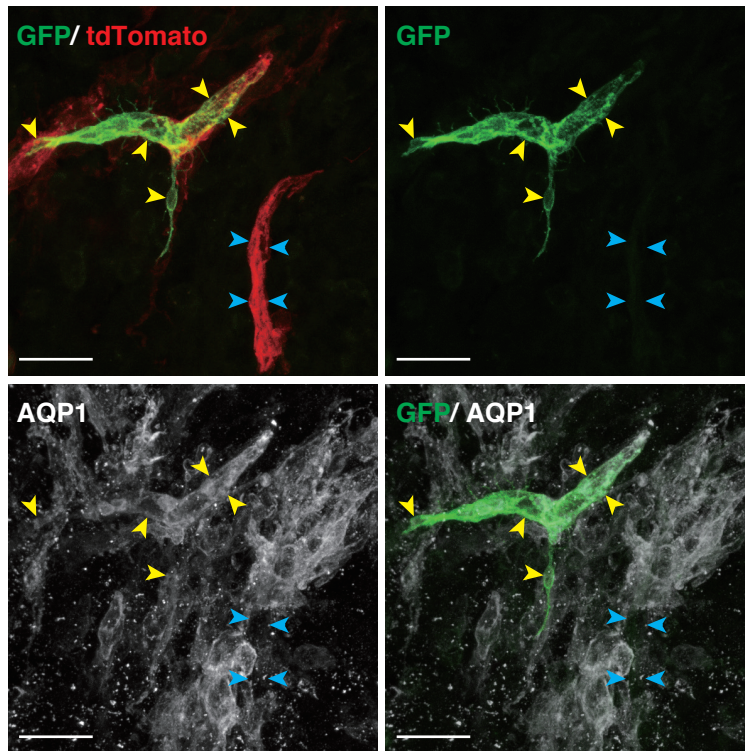

**Extended Data Fig. 7: CLECs in glioma express AQP1.** Counterstaining on PFA-fixed CT2A glioma of *Csf1r-Mer2.Cre<sup>tmG</sup>::BM<sup>WT</sup>* mice using AQP1 antibody. Yellow arrowheads, T\_CLECs; blue arrowheads, T\_EC cells. Scale bar: 25  $\mu$ m.

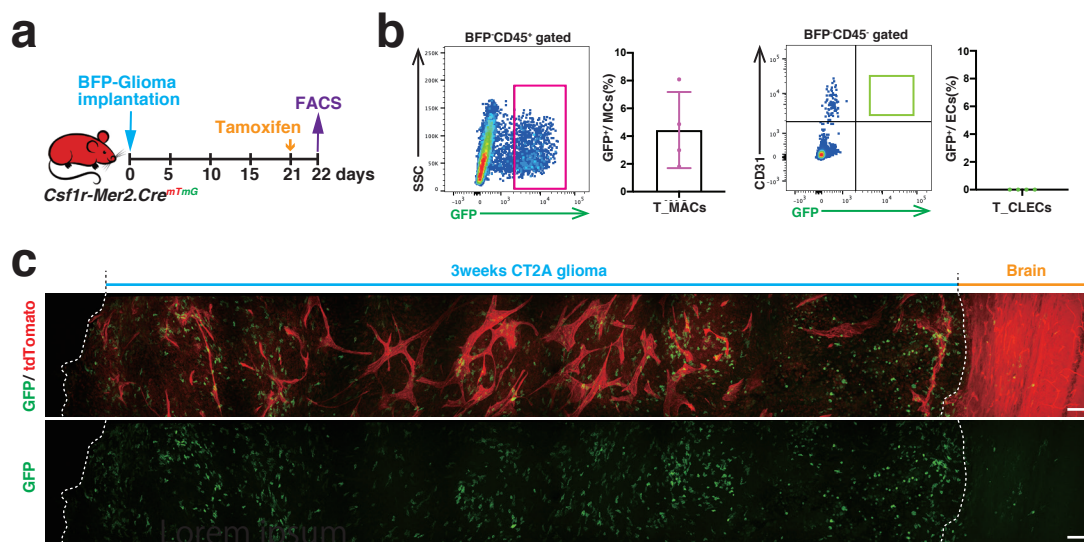

**Extended Data Fig. 8: CLECs in glioma cannot be labelled by GFP within 24 hours after tamoxifen induction.**  
 a-b, Tamoxifen induction timing. b, Quantification of the population of tumour macrophages (T\_MACs: CD45<sup>+</sup>GFP<sup>+</sup>) and tumour CLECs (T\_CLECs: CD45<sup>+</sup>CD31<sup>+</sup>GFP<sup>+</sup>) by flow cytometric analysis in tumour samples (n=4). Bars represent mean  $\pm$  s.d. c, Fluorescent images of PFA-fixed 3 weeks CT2A glioma de of *Csf1r-Mer2.Cre<sup>mTmG</sup>* mice within 24 hours after tamoxifen induction. Scale bar: 100  $\mu$ m.



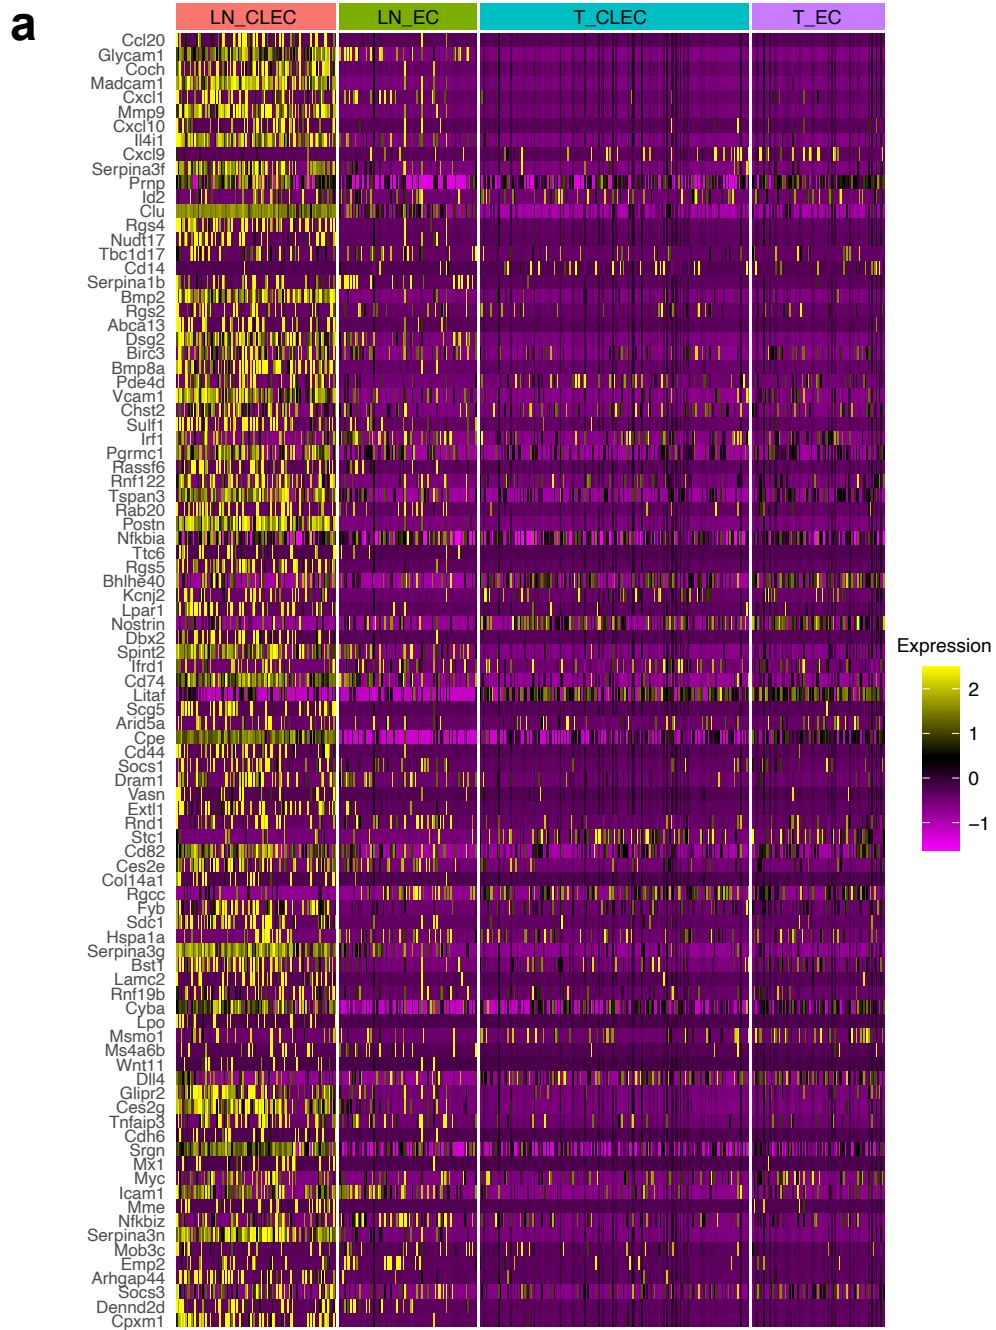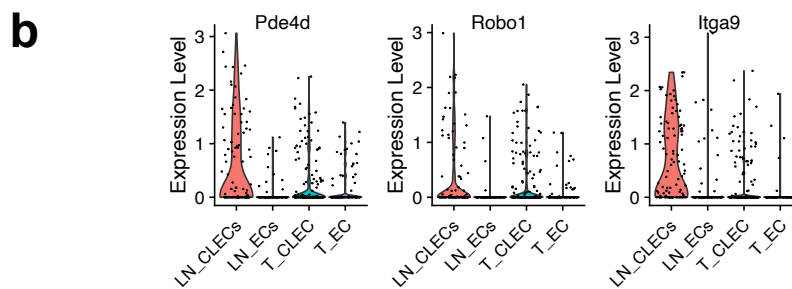

**Extended Data Fig. 9: CLEC and EC heterogeneity in tumor and lymph node .**

a, Heatmap shows the expression of n=91 fLECs markers in LN\_CLEC, LN\_EC, T\_CLEC and T\_EC single cells. b, Violin plots show the expression of 3 CLEC markers: Pde4d, Robo1 and Itga9
