# Supplementary material for: Emerging single cell endothelial heterogeneity supports sprouting tumour angiogenesis and growth
Source: bioRxiv or medRxiv preprint supplement (doi:10.1101/2021.06.09.447719), 2021-06-11
Supplement: Supplementary file [file media-4.pdf]

Supplementary Table 1

| gene     | p_val    | avg_logFC   | pct.1 | pct.2 | p_val_adj | cluster | gene     |
|----------|----------|-------------|-------|-------|-----------|---------|----------|
| Llrb4a   | 1.77E-69 | 2.400385012 | 1     | 0.004 | 2.80E-65  | MAC     | Llrb4a   |
| Bcl2a1b  | 1.77E-69 | 2.189161117 | 1     | 0.004 | 2.80E-65  | MAC     | Bcl2a1b  |
| Mpeg1    | 5.11E-69 | 2.010932239 | 0.988 | 0     | 8.10E-65  | MAC     | Mpeg1    |
| Tyropb   | 6.88E-69 | 2.918688965 | 1     | 0.008 | 1.09E-64  | MAC     | Tyropb   |
| Llrb4b   | 2.46E-68 | 2.329919561 | 0.988 | 0.004 | 3.90E-64  | MAC     | Llrb4b   |
| Fcgr3    | 2.59E-68 | 2.967713703 | 1     | 0.012 | 4.10E-64  | MAC     | Fcgr3    |
| Cd52     | 2.59E-68 | 2.278192308 | 1     | 0.012 | 4.10E-64  | MAC     | Cd52     |
| Aif1     | 2.59E-68 | 2.103100042 | 1     | 0.012 | 4.10E-64  | MAC     | Aif1     |
| Ly86     | 5.88E-68 | 1.946878729 | 0.975 | 0     | 9.32E-64  | MAC     | Ly86     |
| Sp1      | 5.88E-68 | 1.790833527 | 0.975 | 0     | 9.32E-64  | MAC     | Sp1      |
| Ifi30    | 1.13E-67 | 2.182814707 | 1     | 0.017 | 1.80E-63  | MAC     | Ifi30    |
| Apobec1  | 6.67E-67 | 1.931855482 | 0.963 | 0     | 1.06E-62  | MAC     | Apobec1  |
| C1qa     | 1.13E-66 | 3.788283771 | 1     | 0.025 | 1.80E-62  | MAC     | C1qa     |
| Fcgr2b   | 1.13E-66 | 2.74412754  | 1     | 0.025 | 1.80E-62  | MAC     | Fcgr2b   |
| Laptm5   | 1.68E-66 | 2.361074799 | 1     | 0.025 | 2.67E-62  | MAC     | Laptm5   |
| Csf1r    | 3.76E-66 | 2.692010077 | 1     | 0.029 | 5.96E-62  | MAC     | Csf1r    |
| Pla2g7   | 4.48E-66 | 2.385132456 | 0.988 | 0.021 | 7.09E-62  | MAC     | Pla2g7   |
| C1qc     | 1.21E-65 | 4.125327152 | 1     | 0.033 | 1.92E-61  | MAC     | C1qc     |
| Coro1a   | 1.37E-65 | 2.157053059 | 1     | 0.029 | 2.18E-61  | MAC     | Coro1a   |
| Trem2    | 3.33E-65 | 1.787857377 | 0.951 | 0.004 | 5.28E-61  | MAC     | Trem2    |
| C3ar1    | 8.20E-65 | 1.837999673 | 0.938 | 0     | 1.30E-60  | MAC     | C3ar1    |
| Cd300c2  | 8.20E-65 | 1.436111737 | 0.938 | 0     | 1.30E-60  | MAC     | Cd300c2  |
| Pld4     | 1.34E-64 | 2.292815016 | 0.951 | 0.008 | 2.13E-60  | MAC     | Pld4     |
| Rgs1     | 3.61E-64 | 3.074974665 | 0.938 | 0.004 | 5.73E-60  | MAC     | Rgs1     |
| Ilgam    | 3.61E-64 | 1.531582192 | 0.938 | 0.004 | 5.73E-60  | MAC     | Ilgam    |
| Cybb     | 5.92E-64 | 1.695465599 | 0.951 | 0.012 | 9.39E-60  | MAC     | Cybb     |
| Ms4a7    | 6.11E-64 | 1.94153161  | 0.951 | 0.012 | 9.68E-60  | MAC     | Ms4a7    |
| Cd68     | 1.05E-63 | 2.33275647  | 1     | 0.05  | 1.67E-59  | MAC     | Cd68     |
| C1qb     | 2.80E-63 | 4.258745352 | 1     | 0.054 | 4.44E-59  | MAC     | C1qb     |
| Ms4a6c   | 6.25E-63 | 1.450614627 | 0.938 | 0.012 | 9.90E-59  | MAC     | Ms4a6c   |
| Ly2      | 7.73E-63 | 4.475989832 | 1     | 0.058 | 1.23E-58  | MAC     | Ly2      |
| Ctss     | 7.73E-63 | 4.33950261  | 1     | 0.058 | 1.23E-58  | MAC     | Ctss     |
| Cyp4f18  | 9.52E-63 | 1.741252522 | 0.914 | 0     | 1.51E-58  | MAC     | Cyp4f18  |
| Ptprc    | 9.52E-63 | 1.496797575 | 0.914 | 0     | 1.51E-58  | MAC     | Ptprc    |
| Alox5ap  | 2.76E-62 | 1.886439132 | 0.963 | 0.025 | 4.38E-58  | MAC     | Alox5ap  |
| Sirpb1c  | 4.34E-62 | 1.47003952  | 0.914 | 0.004 | 6.88E-58  | MAC     | Sirpb1c  |
| Rgs10    | 1.00E-61 | 1.276072511 | 0.901 | 0     | 1.59E-57  | MAC     | Rgs10    |
| Cd53     | 1.57E-61 | 1.855371111 | 0.988 | 0.045 | 2.49E-57  | MAC     | Cd53     |
| Ptpn6    | 2.74E-61 | 1.607331114 | 0.914 | 0.008 | 4.35E-57  | MAC     | Ptpn6    |
| Clec4a2  | 4.65E-61 | 1.513908845 | 0.901 | 0.004 | 7.37E-57  | MAC     | Clec4a2  |
| Lrp1     | 5.38E-61 | 1.668389423 | 0.914 | 0.008 | 8.53E-57  | MAC     | Lrp1     |
| Fermt3   | 6.14E-61 | 1.49298526  | 0.901 | 0.004 | 9.70E-57  | MAC     | Fermt3   |
| Csf2ra   | 7.19E-61 | 1.317595911 | 0.938 | 0.025 | 1.14E-56  | MAC     | Csf2ra   |
| Ms4a4a   | 1.04E-60 | 1.521905739 | 0.889 | 0     | 1.65E-56  | MAC     | Ms4a4a   |
| Ccl6     | 1.04E-60 | 1.516975938 | 0.889 | 0     | 1.65E-56  | MAC     | Ccl6     |
| Fcgr4    | 1.12E-60 | 1.79610778  | 0.914 | 0.008 | 1.77E-56  | MAC     | Fcgr4    |
| Fcer1g   | 2.14E-60 | 3.44213885  | 1     | 0.083 | 3.40E-56  | MAC     | Fcer1g   |
| Adgre1   | 4.91E-60 | 1.58175684  | 0.889 | 0.004 | 7.79E-56  | MAC     | Adgre1   |
| Wfdc17   | 8.83E-60 | 2.04018847  | 0.901 | 0.012 | 1.40E-55  | MAC     | Wfdc17   |
| Clec12a  | 1.07E-59 | 1.508464223 | 0.877 | 0     | 1.69E-55  | MAC     | Clec12a  |
| Rac2     | 2.29E-59 | 1.650161882 | 0.889 | 0.008 | 3.63E-55  | MAC     | Rac2     |
| Fam105a  | 5.12E-59 | 1.499573611 | 0.877 | 0.004 | 8.11E-55  | MAC     | Fam105a  |
| Igfb2    | 1.08E-58 | 1.545172129 | 0.864 | 0     | 1.71E-54  | MAC     | Igfb2    |
| Lair1    | 1.08E-58 | 1.427215962 | 0.864 | 0     | 1.71E-54  | MAC     | Lair1    |
| Cxcl16   | 2.81E-58 | 2.227180165 | 1     | 0.091 | 4.45E-54  | MAC     | Cxcl16   |
| C5ar1    | 5.41E-58 | 1.676653978 | 0.864 | 0.004 | 8.58E-54  | MAC     | C5ar1    |
| Clec4n   | 1.07E-57 | 1.596936596 | 0.852 | 0     | 1.70E-53  | MAC     | Clec4n   |
| Ctsc     | 3.48E-57 | 2.919063102 | 0.968 | 0.103 | 5.51E-53  | MAC     | Ctsc     |
| Msr1     | 1.05E-56 | 1.516472413 | 0.84  | 0     | 1.67E-52  | MAC     | Msr1     |
| Slamf9   | 1.05E-56 | 1.434402142 | 0.84  | 0     | 1.67E-52  | MAC     | Slamf9   |
| Arrb2    | 1.37E-56 | 1.45361006  | 0.901 | 0.029 | 2.17E-52  | MAC     | Arrb2    |
| Fcgr1    | 5.30E-56 | 1.453610018 | 0.84  | 0.004 | 8.40E-52  | MAC     | Fcgr1    |
| Cd300lf  | 6.17E-56 | 1.405436153 | 0.84  | 0.004 | 9.78E-52  | MAC     | Cd300lf  |
| Axl      | 8.64E-56 | 1.37333071  | 0.889 | 0.021 | 1.37E-51  | MAC     | Axl      |
| Acp5     | 1.54E-55 | 1.861950811 | 0.926 | 0.05  | 2.45E-51  | MAC     | Acp5     |
| Fcrl3    | 5.54E-55 | 1.99176459  | 0.827 | 0.004 | 8.78E-51  | MAC     | Fcrl3    |
| Plek     | 6.64E-55 | 1.260735668 | 0.827 | 0.004 | 1.05E-50  | MAC     | Plek     |
| Nckap1   | 7.65E-55 | 1.31726559  | 0.864 | 0.017 | 1.21E-50  | MAC     | Nckap1   |
| Cd3cr1   | 9.74E-55 | 1.82584762  | 0.815 | 0     | 1.54E-50  | MAC     | Cd3cr1   |
| Sla      | 9.74E-55 | 1.434527979 | 0.815 | 0     | 1.54E-50  | MAC     | Sla      |
| Mrc1     | 1.75E-54 | 1.504749087 | 0.852 | 0.017 | 2.77E-50  | MAC     | Mrc1     |
| Cd33     | 3.53E-54 | 1.347542742 | 0.852 | 0.017 | 5.59E-50  | MAC     | Cd33     |
| Seipg    | 5.30E-54 | 1.472375391 | 0.84  | 0.017 | 8.41E-50  | MAC     | Seipg    |
| Cc5      | 2.44E-53 | 1.4336233   | 0.84  | 0.021 | 3.87E-49  | MAC     | Cc5      |
| Tlr13    | 9.56E-53 | 1.07420537  | 0.827 | 0.012 | 1.52E-48  | MAC     | Tlr13    |
| Lpcat2   | 3.41E-52 | 1.535071916 | 0.852 | 0.025 | 1.40E-48  | MAC     | Lpcat2   |
| Hck      | 4.57E-52 | 1.217824849 | 0.79  | 0.004 | 7.24E-48  | MAC     | Hck      |
| Crr1     | 5.34E-52 | 1.699117324 | 0.815 | 0.017 | 8.47E-48  | MAC     | Crr1     |
| Ew2a     | 8.08E-52 | 1.302358918 | 0.852 | 0.033 | 1.28E-47  | MAC     | Ew2a     |
| H2.DMa   | 1.01E-51 | 1.603167016 | 0.852 | 0.029 | 1.60E-47  | MAC     | H2.DMa   |
| Nsta46b  | 1.44E-51 | 1.698284467 | 0.864 | 0.037 | 2.29E-47  | MAC     | Nsta46b  |
| Mt1      | 2.78E-51 | 1.720681994 | 0.975 | 0.132 | 4.41E-47  | MAC     | Mt1      |
| Cd84     | 2.98E-51 | 1.193123543 | 0.827 | 0.025 | 7.24E-47  | MAC     | Cd84     |
| Ccl3     | 7.07E-51 | 2.044218471 | 0.765 | 0     | 1.12E-46  | MAC     | Ccl3     |
| Scl11a1  | 7.07E-51 | 1.510747551 | 0.765 | 0     | 1.12E-46  | MAC     | Scl11a1  |
| Ncf4     | 7.07E-51 | 1.170621712 | 0.765 | 0     | 1.12E-46  | MAC     | Ncf4     |
| Gpr65    | 7.07E-51 | 1.131568577 | 0.765 | 0     | 1.12E-46  | MAC     | Gpr65    |
| Apo2     | 7.07E-51 | 1.087753959 | 0.765 | 0     | 1.12E-46  | MAC     | Apo2     |
| Cd86     | 7.07E-51 | 1.022165243 | 0.765 | 0     | 1.12E-46  | MAC     | Cd86     |
| Vav1     | 7.07E-51 | 1.008406534 | 0.765 | 0     | 1.12E-46  | MAC     | Vav1     |
| Igfb5    | 1.85E-50 | 1.33655926  | 0.79  | 0.012 | 2.94E-46  | MAC     | Igfb5    |
| Clec4a3  | 6.31E-50 | 1.132583469 | 0.753 | 0     | 9.99E-46  | MAC     | Clec4a3  |
| Bcl2a1d  | 6.31E-50 | 0.96999313  | 0.753 | 0     | 9.99E-46  | MAC     | Bcl2a1d  |
| Hggd5    | 9.53E-50 | 0.968893948 | 0.778 | 0.008 | 1.51E-45  | MAC     | Hggd5    |
| Ncf1     | 1.10E-49 | 1.076307045 | 0.778 | 0.008 | 1.75E-45  | MAC     | Ncf1     |
| Gm2a     | 1.11E-49 | 1.823513617 | 1     | 0.219 | 1.75E-45  | MAC     | Gm2a     |
| Ccl2     | 2.04E-49 | 1.9690662   | 0.864 | 0.041 | 3.23E-45  | MAC     | Ccl2     |
| Ccl4     | 2.05E-49 | 2.292775707 | 0.765 | 0.008 | 3.25E-45  | MAC     | Ccl4     |
| Cd48     | 2.05E-49 | 1.052723344 | 0.765 | 0.008 | 3.25E-45  | MAC     | Cd48     |
| Bin2     | 2.83E-49 | 1.287063192 | 0.765 | 0.008 | 4.48E-45  | MAC     | Bin2     |
| Cd72     | 4.89E-49 | 1.826717892 | 0.827 | 0.037 | 7.75E-45  | MAC     | Cd72     |
| Pldb1    | 5.55E-49 | 1.632109157 | 0.741 | 0     | 8.80E-45  | MAC     | Pldb1    |
| Fgd2     | 5.55E-49 | 1.318948008 | 0.741 | 0     | 8.80E-45  | MAC     | Fgd2     |
| Aoah     | 5.55E-49 | 0.989179868 | 0.741 | 0     | 8.80E-45  | MAC     | Aoah     |
| Apo2     | 1.06E-48 | 5.76904748  | 1     | 0.281 | 1.67E-44  | MAC     | Apo2     |
| Klra2    | 4.82E-48 | 1.07734313  | 0.728 | 0     | 7.65E-44  | MAC     | Klra2    |
| Prune2   | 5.85E-48 | 1.135055499 | 0.84  | 0.041 | 9.27E-44  | MAC     | Prune2   |
| Ifi5     | 1.08E-47 | 1.501959508 | 0.877 | 0.091 | 1.72E-43  | MAC     | Ifi5     |
| Ifi207   | 2.25E-47 | 1.035036117 | 0.753 | 0.012 | 3.56E-43  | MAC     | Ifi207   |
| Bcl2a1a  | 4.14E-47 | 1.005691984 | 0.716 | 0     | 6.56E-43  | MAC     | Bcl2a1a  |
| Tmem119  | 4.60E-47 | 1.483698869 | 0.728 | 0.004 | 7.29E-43  | MAC     | Tmem119  |
| Arhgap45 | 3.50E-46 | 1.004643969 | 0.704 | 0     | 5.55E-42  | MAC     | Arhgap45 |
| Tbxa1    | 4.84E-46 | 1.013880169 | 0.728 | 0.008 | 7.67E-42  | MAC     | Tbxa1    |
| Sirpa    | 6.66E-46 | 1.643392497 | 0.963 | 0.169 | 1.06E-41  | MAC     | Sirpa    |
| Ctsh     | 9.56E-46 | 2.001194247 | 0.988 | 0.252 | 1.51E-41  | MAC     | Ctsh     |

| gene     | p_val    | avg_logFC   | pct.1 | pct.2 | p_val_adj | Seurat_cluster | gene     |
|----------|----------|-------------|-------|-------|-----------|----------------|----------|
| Lrg1     | 2.39E-28 | 1.416100655 | 1     | 0.601 | 3.79E-24  | 0              | Lrg1     |
| Ly6c1    | 1.45E-27 | 1.251394325 | 0.958 | 0.513 | 2.31E-23  | 0              | Ly6c1    |
| Ly6a     | 1.27E-24 | 1.158792599 | 0.989 | 0.693 | 2.02E-20  | 0              | Ly6a     |
| Entpd1   | 2.29E-19 | 1.058261784 | 0.926 | 0.816 | 3.63E-15  | 0              | Entpd1   |
| Cyrr1    | 2.98E-19 | 0.932372667 | 0.905 | 0.518 | 4.73E-15  | 0              | Cyrr1    |
| Heag1    | 9.20E-18 | 0.842477285 | 0.968 | 0.575 | 1.46E-13  | 0              | Heag1    |
| Slc02a1  | 2.84E-17 | 1.040811755 | 0.832 | 0.43  | 4.51E-13  | 0              | Slc02a1  |
| Ramp2    | 8.90E-17 | 0.718415995 | 0.958 | 0.508 | 1.41E-12  | 0              | Ramp2    |
| Mgp      | 1.78E-16 | 1.47038136  | 0.495 | 0.11  | 2.82E-12  | 0              | Mgp      |
| Cd200    | 2.58E-16 | 0.79260323  | 1     | 0.649 | 4.09E-12  | 0              | Cd200    |
| Slc9a3r2 | 4.11E-16 | 0.896849171 | 0.884 | 0.508 | 6.52E-12  | 0              | Slc9a3r2 |
| Insr     | 6.19E-16 | 0.942762923 | 0.863 | 0.509 | 9.80E-12  | 0              | Insr     |
| Thbd     | 9.70E-16 | 0.847426382 | 0.663 | 0.232 | 1.54E-11  | 0              | Thbd     |
| Podxl    | 7.84E-15 | 0.782148002 | 0.853 | 0.487 | 1.24E-11  | 0              | Podxl    |
| Ptprb    | 1.51E-14 | 0.780920999 | 0.905 | 0.557 | 2.39E-11  | 0              | Ptprb    |
| Calcr1   | 2.34E-14 | 0.752624296 | 0.811 | 0.43  | 3.71E-11  | 0              | Calcr1   |
| Tsc22d1  | 3.33E-14 | 0.962864556 | 0.863 | 0.482 | 5.28E-11  | 0              | Tsc22d1  |
| Jam2     | 5.39E-14 | 0.930801989 | 0.663 | 0.25  | 8.55E-11  | 0              | Jam2     |
| Cxcl1a   | 7.79E-14 | 0.580798406 | 0.926 | 0.61  | 1.23E-09  | 0              | Cxcl1a   |
| Igfbp7   | 1.94E-13 | 0.726377765 | 1     | 0.671 | 3.08E-09  | 0              | Igfbp7   |
| Plpp3    | 3.05E-13 | 0.876499368 | 0.821 | 0.434 | 4.83E-09  | 0              | Plpp3    |
| Lims2    | 6.84E-13 | 0.795972978 | 0.505 | 0.136 | 1.08E-08  | 0              | Lims2    |
| Ptprg    | 7.45E-13 | 0.6501828   | 0.695 | 0.285 | 1.18E-08  | 0              | Ptprg    |
| Id1      | 9.76E-13 | 0.88506272  | 0.758 | 0.417 | 1.55E-08  | 0              | Id1      |
| Epas1    | 4.14E-12 | 0.          |       |       |           |                |          |

|          |          |             |       |       |          |     |          |
|----------|----------|-------------|-------|-------|----------|-----|----------|
| Dpep2    | 1,42E-45 | 1,043355863 | 0,716 | 0,008 | 2,26E-41 | MAC | Dpep2    |
| Pilra    | 2,15E-45 | 1,017843766 | 0,704 | 0,004 | 3,40E-41 | MAC | Pilra    |
| Clec4a1  | 2,93E-45 | 1,24646934  | 0,691 | 0     | 4,64E-41 | MAC | Clec4a1  |
| Pid1     | 2,93E-45 | 1,043526642 | 0,691 | 0     | 4,64E-41 | MAC | Pid1     |
| Tifab    | 2,93E-45 | 0,893903155 | 0,691 | 0     | 4,64E-41 | MAC | Tifab    |
| Pirb     | 3,32E-45 | 1,387346463 | 0,741 | 0,021 | 5,26E-41 | MAC | Pirb     |
| Lst1     | 4,33E-45 | 0,643469085 | 0,728 | 0,017 | 6,86E-41 | MAC | Lst1     |
| Lgals3   | 8,65E-45 | 2,203308785 | 0,864 | 0,099 | 1,37E-40 | MAC | Lgals3   |
| Pf4      | 1,58E-44 | 1,235653998 | 0,753 | 0,029 | 2,50E-40 | MAC | Pf4      |
| Cd14     | 2,50E-44 | 1,973991269 | 0,938 | 0,145 | 3,97E-40 | MAC | Cd14     |
| Zmynd15  | 1,06E-43 | 1,512281879 | 0,704 | 0,012 | 1,68E-39 | MAC | Zmynd15  |
| Pycard   | 1,10E-43 | 1,183325971 | 0,864 | 0,087 | 1,74E-39 | MAC | Pycard   |
| AU020206 | 1,51E-43 | 1,118438958 | 0,951 | 0,178 | 2,39E-39 | MAC | AU020206 |
| Efh2d    | 1,74E-43 | 1,550336541 | 0,963 | 0,219 | 2,75E-39 | MAC | Efh2d    |
| Sirpb1b  | 1,97E-43 | 0,458000508 | 0,667 | 0     | 3,12E-39 | MAC | Sirpb1b  |
| Rgs2     | 2,44E-43 | 1,650651099 | 0,951 | 0,161 | 3,87E-39 | MAC | Rgs2     |
| Tlr2     | 4,10E-43 | 1,300151531 | 0,765 | 0,037 | 6,50E-39 | MAC | Tlr2     |
| Unc93b1  | 5,60E-43 | 1,83824491  | 1     | 0,351 | 8,88E-39 | MAC | Unc93b1  |
| H2-Aa    | 6,01E-43 | 2,966786186 | 0,827 | 0,083 | 9,53E-39 | MAC | H2-Aa    |
| P2ry6    | 7,69E-43 | 1,356527043 | 0,827 | 0,07  | 1,22E-38 | MAC | P2ry6    |
| Gatm     | 2,41E-42 | 1,559059904 | 0,926 | 0,157 | 3,82E-38 | MAC | Gatm     |
| Ctsz     | 2,54E-42 | 2,09688997  | 1     | 0,413 | 4,02E-38 | MAC | Ctsz     |
| Ccl7     | 4,74E-42 | 2,092756852 | 0,679 | 0,012 | 7,52E-38 | MAC | Ccl7     |
| Cd83     | 1,26E-41 | 1,366010777 | 0,642 | 0     | 1,99E-37 | MAC | Cd83     |
| Itgal    | 1,26E-41 | 0,788248745 | 0,642 | 0     | 1,99E-37 | MAC | Itgal    |
| Ucp2     | 1,35E-41 | 2,064485573 | 1     | 0,405 | 2,14E-37 | MAC | Ucp2     |
| Ntpcr    | 3,70E-41 | 1,495518791 | 0,901 | 0,161 | 5,86E-37 | MAC | Ntpcr    |
| Cst3     | 4,35E-41 | 1,849523553 | 1     | 0,851 | 6,89E-37 | MAC | Cst3     |
| Zeb2     | 6,25E-41 | 0,941150684 | 0,741 | 0,033 | 9,91E-37 | MAC | Zeb2     |
| Ccl9     | 8,03E-41 | 1,141040972 | 0,642 | 0,004 | 1,27E-36 | MAC | Ccl9     |
| Myo1f    | 9,85E-41 | 0,881048734 | 0,63  | 0     | 1,56E-36 | MAC | Myo1f    |
| Rbm47    | 9,89E-41 | 0,388600047 | 0,704 | 0,025 | 1,57E-36 | MAC | Rbm47    |
| Hexb     | 1,01E-40 | 1,958017343 | 0,988 | 0,298 | 1,60E-36 | MAC | Hexb     |
| Grn      | 1,61E-40 | 1,850319544 | 1     | 0,773 | 2,55E-36 | MAC | Grn      |
| Gm42031  | 2,09E-40 | 0,618574808 | 0,914 | 0,198 | 3,31E-36 | MAC | Gm42031  |
| Gm6377   | 2,52E-40 | 1,042744529 | 0,642 | 0,004 | 3,99E-36 | MAC | Gm6377   |
| Celf2    | 2,62E-40 | 0,88320141  | 0,654 | 0,008 | 4,15E-36 | MAC | Celf2    |
| Ncf2     | 3,99E-40 | 0,968890726 | 0,691 | 0,021 | 6,32E-36 | MAC | Ncf2     |
| Fth1     | 4,75E-40 | 1,914775366 | 1     | 0,988 | 7,54E-36 | MAC | Fth1     |
| Tfai1    | 7,51E-40 | 1,614515569 | 1     | 0,992 | 1,19E-35 | MAC | Tfai1    |
| Spint1   | 7,63E-40 | 0,95144666  | 0,617 | 0     | 1,21E-35 | MAC | Spint1   |
| Il10ra   | 7,63E-40 | 0,902622275 | 0,617 | 0     | 1,21E-35 | MAC | Il10ra   |
| Lrrc25   | 7,63E-40 | 0,673458635 | 0,617 | 0     | 1,21E-35 | MAC | Lrrc25   |
| Emb      | 7,95E-40 | 1,216127566 | 0,642 | 0,008 | 1,26E-35 | MAC | Emb      |
| Cd74     | 1,34E-39 | 3,250433361 | 0,951 | 0,24  | 2,12E-35 | MAC | Cd74     |
| Trf      | 2,10E-39 | 2,137320354 | 0,963 | 0,326 | 3,32E-35 | MAC | Trf      |
| Ppfia4   | 5,01E-39 | 0,953528514 | 0,617 | 0,004 | 7,94E-35 | MAC | Ppfia4   |
| Bhlhe41  | 5,75E-39 | 0,793743502 | 0,667 | 0,017 | 9,12E-35 | MAC | Bhlhe41  |
| Arhgap30 | 5,84E-39 | 0,740906224 | 0,605 | 0     | 9,26E-35 | MAC | Arhgap30 |
| Lat2     | 7,18E-39 | 1,045474674 | 0,728 | 0,045 | 1,14E-34 | MAC | Lat2     |
| Cfp      | 8,85E-39 | 0,997574157 | 0,617 | 0,004 | 1,40E-34 | MAC | Cfp      |
| Prkcd    | 1,40E-38 | 1,198810565 | 0,765 | 0,066 | 2,21E-34 | MAC | Prkcd    |
| Lgmn     | 1,49E-38 | 1,686533885 | 1     | 0,897 | 2,35E-34 | MAC | Lgmn     |
| Rab31i1  | 2,08E-38 | 1,270197707 | 0,802 | 0,083 | 3,30E-34 | MAC | Rab31i1  |
| Cebpb    | 2,44E-38 | 1,020953092 | 0,802 | 0,083 | 3,88E-34 | MAC | Cebpb    |
| Man2b1   | 2,71E-38 | 1,68834718  | 0,988 | 0,401 | 4,29E-34 | MAC | Man2b1   |
| Dock10   | 3,89E-38 | 0,670253041 | 0,605 | 0,004 | 6,16E-34 | MAC | Dock10   |
| Hk2      | 3,89E-38 | 0,537198907 | 0,605 | 0,004 | 6,16E-34 | MAC | Hk2      |
| Ifi271a2 | 4,05E-38 | 0,863232196 | 0,617 | 0,008 | 6,42E-34 | MAC | Ifi271a2 |
| Olfml3   | 4,07E-38 | 0,944676953 | 0,642 | 0,017 | 6,46E-34 | MAC | Olfml3   |
| Cyba     | 6,51E-38 | 1,447746936 | 1     | 0,736 | 1,03E-33 | MAC | Cyba     |
| Cebpa    | 6,91E-38 | 0,678538118 | 0,63  | 0,012 | 1,10E-33 | MAC | Cebpa    |
| Cep85    | 7,38E-38 | 1,125955149 | 0,951 | 0,223 | 1,17E-33 | MAC | Cep85    |
| H2-Eb1   | 7,56E-38 | 2,820393909 | 0,778 | 0,091 | 1,20E-33 | MAC | H2-Eb1   |
| Psap     | 9,09E-38 | 1,816068891 | 1     | 0,74  | 1,44E-33 | MAC | Psap     |
| Tgfb1    | 1,25E-37 | 1,886260686 | 0,975 | 0,285 | 1,98E-33 | MAC | Tgfb1    |
| Sdc4     | 1,61E-37 | 1,174851714 | 0,877 | 0,136 | 2,55E-33 | MAC | Sdc4     |
| Ccl12    | 3,29E-37 | 1,327348185 | 0,58  | 0     | 5,22E-33 | MAC | Ccl12    |
| Tlr7     | 3,29E-37 | 0,571550199 | 0,58  | 0     | 5,22E-33 | MAC | Tlr7     |
| Sirpb1a  | 3,29E-37 | 0,483691495 | 0,58  | 0     | 5,22E-33 | MAC | Sirpb1a  |
| Lpxn     | 4,54E-37 | 0,945621838 | 0,593 | 0,004 | 7,20E-33 | MAC | Lpxn     |
| Arhgd1b  | 1,06E-36 | 1,5222498   | 0,951 | 0,322 | 1,69E-32 | MAC | Arhgd1b  |
| Maf      | 1,49E-36 | 0,856992054 | 0,852 | 0,128 | 2,37E-32 | MAC | Maf      |
| Adcy7    | 1,70E-36 | 0,839789888 | 0,617 | 0,017 | 2,69E-32 | MAC | Adcy7    |
| Ftl1-ps1 | 1,77E-36 | 0,797047456 | 0,988 | 0,913 | 2,81E-32 | MAC | Ftl1-ps1 |
| Clec7a   | 2,25E-36 | 0,963189716 | 0,58  | 0,004 | 3,57E-32 | MAC | Clec7a   |
| Rab7b    | 2,38E-36 | 0,953264266 | 0,58  | 0,004 | 3,77E-32 | MAC | Rab7b    |
| Gsn      | 5,04E-36 | 1,154446012 | 0,765 | 0,083 | 7,99E-32 | MAC | Gsn      |
| Slc7a8   | 5,85E-36 | 0,671393786 | 0,58  | 0,004 | 9,27E-32 | MAC | Slc7a8   |
| Vsir     | 8,31E-36 | 1,17055103  | 0,901 | 0,182 | 1,32E-31 | MAC | Vsir     |
| Mafb     | 8,90E-36 | 1,590650052 | 0,877 | 0,198 | 1,41E-31 | MAC | Mafb     |
| Slc15a3  | 1,27E-35 | 0,760427349 | 0,741 | 0,062 | 2,02E-31 | MAC | Slc15a3  |
| Sxbp2    | 1,54E-35 | 0,791656462 | 0,605 | 0,017 | 2,44E-31 | MAC | Sxbp2    |
| Gm43549  | 1,67E-35 | 0,377947293 | 0,605 | 0,017 | 2,65E-31 | MAC | Gm43549  |
| Themis2  | 1,73E-35 | 0,640242425 | 0,568 | 0,004 | 2,74E-31 | MAC | Themis2  |
| Evi2b    | 3,66E-35 | 0,626299369 | 0,593 | 0,012 | 5,81E-31 | MAC | Evi2b    |
| Gm43305  | 6,48E-35 | 0,828603696 | 0,988 | 0,368 | 1,03E-30 | MAC | Gm43305  |
| Tmem106a | 1,08E-34 | 1,065465683 | 0,778 | 0,103 | 1,72E-30 | MAC | Tmem106a |
| Adap2    | 1,27E-34 | 0,421789164 | 0,543 | 0     | 2,02E-30 | MAC | Adap2    |
| Parvg    | 1,43E-34 | 0,797120824 | 0,556 | 0,004 | 2,26E-30 | MAC | Parvg    |
| Dock2    | 1,47E-34 | 0,745931628 | 0,556 | 0,004 | 2,33E-30 | MAC | Dock2    |
| Ctsb     | 1,63E-34 | 1,277189877 | 1     | 0,975 | 2,59E-30 | MAC | Ctsb     |
| Rab32    | 2,55E-34 | 1,038452288 | 0,704 | 0,066 | 4,04E-30 | MAC | Rab32    |
| Npc2     | 2,66E-34 | 1,352299046 | 1     | 0,636 | 4,21E-30 | MAC | Npc2     |
| Prdx5    | 2,91E-34 | 1,374611256 | 0,988 | 0,607 | 4,62E-30 | MAC | Prdx5    |
| Ptprrj   | 3,68E-34 | 0,500222645 | 0,568 | 0,008 | 5,84E-30 | MAC | Ptprrj   |
| Pklb     | 9,07E-34 | 0,616131471 | 0,531 | 0     | 1,44E-29 | MAC | Pklb     |
| Igfbp4   | 9,71E-34 | 0,887651126 | 0,556 | 0,008 | 1,54E-29 | MAC | Igfbp4   |
| AB124611 | 1,10E-33 | 0,690231993 | 0,543 | 0,004 | 1,74E-29 | MAC | AB124611 |
| Snx5     | 1,11E-33 | 1,439090225 | 0,963 | 0,401 | 1,75E-29 | MAC | Snx5     |
| Ctsa     | 2,05E-33 | 1,413419045 | 1     | 0,682 | 3,25E-29 | MAC | Ctsa     |
| Lgals1   | 3,49E-33 | 1,223815921 | 0,988 | 0,426 | 5,54E-29 | MAC | Lgals1   |
| Ctsd     | 3,81E-33 | 1,766775887 | 1     | 0,682 | 6,04E-29 | MAC | Ctsd     |
| Zfp36    | 5,17E-33 | 1,747150546 | 0,975 | 0,521 | 8,19E-29 | MAC | Zfp36    |
| Mertk    | 5,99E-33 | 0,832936549 | 0,642 | 0,041 | 9,50E-29 | MAC | Mertk    |
| P2ry12   | 6,52E-33 | 0,808904511 | 0,531 | 0,004 | 1,03E-28 | MAC | P2ry12   |
| Sema4b   | 6,64E-33 | 0,288141104 | 0,679 | 0,05  | 1,05E-28 | MAC | Sema4b   |
| Izkf1    | 7,49E-33 | 0,751378546 | 0,531 | 0,004 | 1,19E-28 | MAC | Izkf1    |
| H2-DMb1  | 8,88E-33 | 1,266057588 | 0,79  | 0,12  | 1,41E-28 | MAC | H2-DMb1  |
| Cd44     | 9,88E-33 | 0,627273201 | 0,531 | 0,004 | 1,57E-28 | MAC | Cd44     |
| Rnase4   | 1,84E-32 | 1,37399573  | 0,914 | 0,248 | 2,92E-28 | MAC | Rnase4   |
| Runx1    | 3,16E-32 | 0,700503396 | 0,58  | 0,025 | 5,01E-28 | MAC | Runx1    |
| Sema4d   | 4,44E-32 | 0,58492625  | 0,506 | 0     | 7,03E-28 | MAC | Sema4d   |
| Fgl2     | 4,64E-32 | 0,879039726 | 0,519 | 0,004 | 7,36E-28 | MAC | Fgl2     |
| F13a1    | 4,77E-32 | 1,363365067 | 0,519 | 0,004 | 7,57E-28 | MAC | F13a1    |
| Naaa     | 4,91E-32 | 0,736130496 | 0,519 | 0,004 | 7,78E-28 | MAC | Naaa     |
| Sh2d1b1  | 5,05E-32 | 0,718340252 | 0,519 | 0,004 | 8,00E-28 | MAC | Sh2d1b1  |
| Arl11    | 6,16E-32 | 0,844862586 | 0,593 | 0,029 | 9,76E-28 | MAC | Arl11    |
| Atp13a2  | 8,76E-32 | 0,949076139 | 0,728 | 0,099 | 1,39E-27 | MAC | Atp13a2  |

|         |          |             |       |       |             |   |         |
|---------|----------|-------------|-------|-------|-------------|---|---------|
| Tm4sf1  | 3,06E-06 | 0,423926489 | 0,958 | 0,632 | 0,048526806 | 0 | Tm4sf1  |
| Sorbs3  | 3,11E-06 | 0,376208232 | 0,832 | 0,677 | 0,049249966 | 0 | Sorbs3  |
| Elk3    | 3,54E-06 | 0,380131109 | 0,937 | 0,622 | 0,056143765 | 0 | Elk3    |
| Timp3   | 4,02E-06 | 0,489366934 | 0,821 | 0,579 | 0,06380617  | 0 | Timp3   |
| Dock6   | 4,09E-06 | 0,415448544 | 0,6   | 0,338 | 0,06476602  | 0 | Dock6   |
| Cmtm8   | 4,19E-06 | 0,319628339 | 0,453 | 0,215 | 0,066437203 | 0 | Cmtm8   |
| Clu     | 4,35E-06 | 0,716242929 | 0,421 | 0,189 | 0,068940008 | 0 | Clu     |
| Lamb2   | 4,36E-06 | 0,335902195 | 0,358 | 0,136 | 0,069040934 | 0 | Lamb2   |
| Ifitm3  | 4,67E-06 | 0,357121638 | 0,979 | 0,939 | 0,074066168 | 0 | Ifitm3  |
| Mk2     | 4,68E-06 | 0,585214234 | 0,768 | 0,522 | 0,074257263 | 0 | Mk2     |
| Cd93    | 4,75E-06 | 0,322084985 | 1     | 0,899 | 0,075270601 | 0 | Cd93    |
| Cmp1    | 4,87E-06 | 0,496277663 | 0,716 | 0,513 | 0,077214529 | 0 | Cmp1    |
| Ecm1    | 5,09E-06 | 0,505516163 | 0,884 | 0,759 | 0,080728782 | 0 | Ecm1    |
| Fry     | 5,74E-06 | 0,252052617 | 0,632 | 0,373 | 0,091061283 | 0 | Fry     |
| Pmp22   | 7,89E-06 | 0,467662952 | 0,4   | 0,189 | 0,125071149 | 0 | Pmp22   |
| Nostrin | 8,02E-06 | 0,414634252 | 0,695 | 0,504 | 0,127139951 | 0 | Nostrin |
| Vamp5   | 8,33E-06 | 0,337434073 | 0,695 | 0,439 | 0,13197018  | 0 | Vamp5   |
| Plec    | 1,06E-05 | 0,278941939 | 0,937 | 0,715 | 0,167917629 | 0 | Plec    |
| Ppic    | 1,10E-05 | 0,378500811 | 0,916 | 0,64  | 0,174491229 | 0 | Ppic    |
| Pitpnc1 | 1,13E-05 | 0,412136503 | 0,758 | 0,548 | 0,178600613 | 0 | Pitpnc1 |
| Ephb4   | 1,38E-05 | 0,334243703 | 0,642 | 0,368 | 0,218639944 |   |         |

|          |          |             |       |       |          |     |          |
|----------|----------|-------------|-------|-------|----------|-----|----------|
| Mapkap3  | 1,11E-31 | 0,677580928 | 0,531 | 0,008 | 1,76E-27 | MAC | Mapkap3  |
| Gm22133  | 1,11E-31 | 0,520499036 | 0,963 | 0,781 | 1,76E-27 | MAC | Gm22133  |
| Sh3bp1   | 1,66E-31 | 0,546644652 | 0,543 | 0,012 | 2,63E-27 | MAC | Sh3bp1   |
| Tgfbr1   | 3,01E-31 | 1,042124834 | 0,901 | 0,207 | 4,78E-27 | MAC | Tgfbr1   |
| Lsp1     | 3,05E-31 | 1,015425272 | 0,494 | 0     | 4,83E-27 | MAC | Lsp1     |
| Arhgap9  | 3,05E-31 | 0,53213342  | 0,494 | 0     | 4,83E-27 | MAC | Arhgap9  |
| Tagap    | 3,26E-31 | 1,05180134  | 0,519 | 0,008 | 5,17E-27 | MAC | Tagap    |
| Milr1    | 3,83E-31 | 0,769847035 | 0,568 | 0,025 | 6,07E-27 | MAC | Milr1    |
| Fyb      | 6,18E-31 | 1,187172025 | 0,914 | 0,355 | 9,80E-27 | MAC | Fyb      |
| Pkrcb    | 7,05E-31 | 0,544190178 | 0,506 | 0,004 | 1,12E-26 | MAC | Pkrcb    |
| Atpv6Oc  | 1,36E-30 | 1,035339302 | 1     | 1,872 | 2,16E-26 | MAC | Atpv6Oc  |
| Arhgap15 | 2,07E-30 | 0,587595427 | 0,481 | 0     | 3,28E-26 | MAC | Arhgap15 |
| Rumx3    | 2,07E-30 | 0,568885157 | 0,481 | 0     | 3,28E-26 | MAC | Rumx3    |
| Hexa     | 2,18E-30 | 1,367739242 | 0,914 | 0,322 | 3,45E-26 | MAC | Hexa     |
| Itgax    | 2,34E-30 | 0,940423925 | 0,494 | 0,004 | 3,70E-26 | MAC | Itgax    |
| Tepl     | 2,97E-30 | 0,925350018 | 0,728 | 0,112 | 4,70E-26 | MAC | Tepl     |
| Emilin2  | 3,21E-30 | 0,735592592 | 0,519 | 0,012 | 5,08E-26 | MAC | Emilin2  |
| Cyth4    | 4,45E-30 | 1,136689241 | 0,827 | 0,202 | 7,05E-26 | MAC | Cyth4    |
| Arap1    | 6,23E-30 | 0,662836078 | 0,642 | 0,062 | 9,87E-26 | MAC | Arap1    |
| Arhgap19 | 1,09E-29 | 0,721811133 | 0,556 | 0,029 | 1,73E-25 | MAC | Arhgap19 |
| Abcc3    | 1,19E-29 | 0,69645675  | 0,556 | 0,025 | 1,89E-25 | MAC | Abcc3    |
| Ighm     | 1,39E-29 | 1,006104576 | 0,469 | 0     | 2,20E-25 | MAC | Ighm     |
| Blnk     | 1,39E-29 | 0,9001503   | 0,469 | 0     | 2,20E-25 | MAC | Blnk     |
| Col14a1  | 1,39E-29 | 0,803681873 | 0,469 | 0     | 2,20E-25 | MAC | Col14a1  |
| Clec5a   | 1,39E-29 | 0,783345542 | 0,469 | 0     | 2,20E-25 | MAC | Clec5a   |
| Cxcl14   | 1,56E-29 | 0,679460214 | 0,481 | 0,004 | 2,48E-25 | MAC | Cxcl14   |
| Icosl    | 1,77E-29 | 0,311099298 | 0,543 | 0,021 | 2,81E-25 | MAC | Icosl    |
| Rps29    | 2,74E-29 | 0,619448213 | 1     | 0,996 | 4,35E-25 | MAC | Rps29    |
| Notch2   | 3,02E-29 | 0,632063456 | 0,901 | 0,252 | 4,79E-25 | MAC | Notch2   |
| Tpd52    | 3,87E-29 | 0,979458038 | 0,938 | 0,273 | 6,14E-25 | MAC | Tpd52    |
| Rassf4   | 4,41E-29 | 0,844686742 | 0,642 | 0,066 | 6,99E-25 | MAC | Rassf4   |
| Fam49b   | 4,94E-29 | 1,225835016 | 0,901 | 0,335 | 7,83E-25 | MAC | Fam49b   |
| Ptatr    | 1,06E-28 | 0,605476117 | 0,469 | 0,004 | 1,68E-24 | MAC | Ptatr    |
| Csf3r    | 1,12E-28 | 0,796284593 | 0,469 | 0,004 | 1,78E-24 | MAC | Csf3r    |
| Nfam1    | 1,13E-28 | 0,766262085 | 0,481 | 0,008 | 1,79E-24 | MAC | Nfam1    |
| Gns      | 1,39E-28 | 1,237033357 | 0,938 | 0,339 | 2,21E-24 | MAC | Gns      |
| Metnrl   | 1,71E-28 | 0,712839286 | 0,531 | 0,025 | 2,71E-24 | MAC | Metnrl   |
| Ptk2b    | 2,50E-28 | 0,520270734 | 0,481 | 0,008 | 3,96E-24 | MAC | Ptk2b    |
| Spp1     | 4,51E-28 | 2,849304487 | 0,568 | 0,045 | 9,61E-24 | MAC | Spp1     |
| Hvcn1    | 6,06E-28 | 0,687798307 | 0,444 | 0     | 9,61E-24 | MAC | Hvcn1    |
| Siglece  | 6,06E-28 | 0,6231922   | 0,444 | 0     | 9,61E-24 | MAC | Siglece  |
| Stk17b   | 7,55E-28 | 0,953648699 | 0,63  | 0,07  | 1,20E-23 | MAC | Stk17b   |
| Gmfg     | 7,74E-28 | 0,786944147 | 0,889 | 0,264 | 1,23E-23 | MAC | Gmfg     |
| B4galnt1 | 1,45E-27 | 0,745542904 | 0,481 | 0,012 | 2,30E-23 | MAC | B4galnt1 |
| Il6ra    | 1,51E-27 | 0,578527358 | 0,494 | 0,017 | 2,40E-23 | MAC | Il6ra    |
| Glipr1   | 1,56E-27 | 0,594104761 | 0,543 | 0,037 | 2,47E-23 | MAC | Glipr1   |
| Creg1    | 1,86E-27 | 0,938382843 | 0,778 | 0,161 | 2,94E-23 | MAC | Creg1    |
| Fmn1     | 2,48E-27 | 0,397439907 | 0,568 | 0,041 | 3,92E-23 | MAC | Fmn1     |
| Gm13166  | 3,24E-27 | 0,267573753 | 0,765 | 0,178 | 5,13E-23 | MAC | Gm13166  |
| Pik3ap1  | 3,93E-27 | 0,46500539  | 0,432 | 0     | 6,24E-23 | MAC | Pik3ap1  |
| Pou2f2   | 3,93E-27 | 0,374063164 | 0,432 | 0     | 6,24E-23 | MAC | Pou2f2   |
| Slc6a6   | 4,03E-27 | 0,792335408 | 0,877 | 0,231 | 6,39E-23 | MAC | Slc6a6   |
| Ms4a4c   | 4,73E-27 | 0,992016276 | 0,444 | 0,004 | 7,51E-23 | MAC | Ms4a4c   |
| AW112010 | 5,62E-27 | 1,50202659  | 0,827 | 0,236 | 8,91E-23 | MAC | AW112010 |
| H2-Ab1   | 5,67E-27 | 2,549173623 | 0,852 | 0,306 | 8,98E-23 | MAC | H2-Ab1   |
| Camk1d   | 6,91E-27 | 0,488902103 | 0,444 | 0,004 | 1,09E-22 | MAC | Camk1d   |
| Sifn2    | 7,35E-27 | 0,99484791  | 0,802 | 0,174 | 1,17E-22 | MAC | Sifn2    |
| Fnbp1    | 1,30E-26 | 0,903192124 | 0,778 | 0,174 | 2,05E-22 | MAC | Fnbp1    |
| Selenop  | 1,67E-26 | 1,279415566 | 0,988 | 0,818 | 2,64E-22 | MAC | Selenop  |
| Tcigr1   | 2,03E-26 | 1,326977134 | 0,889 | 0,367 | 3,22E-22 | MAC | Tcigr1   |
| Fos      | 2,48E-26 | 1,53835635  | 0,951 | 0,476 | 3,93E-22 | MAC | Fos      |
| Gm14303  | 3,50E-26 | 0,508652242 | 1     | 0,983 | 5,55E-22 | MAC | Gm14303  |
| Rassf5   | 3,65E-26 | 0,824555347 | 0,432 | 0,004 | 5,79E-22 | MAC | Rassf5   |
| Susd3    | 5,46E-26 | 0,617745883 | 0,444 | 0,008 | 8,66E-22 | MAC | Susd3    |
| Abhd12   | 5,56E-26 | 0,777833898 | 0,802 | 0,178 | 8,82E-22 | MAC | Abhd12   |
| Havcr2   | 6,08E-26 | 0,515268894 | 0,432 | 0,004 | 9,63E-22 | MAC | Havcr2   |
| Arhgef6  | 8,94E-26 | 0,368266832 | 0,457 | 0,012 | 1,42E-21 | MAC | Arhgef6  |
| Fabp5    | 1,08E-25 | 0,704699434 | 0,469 | 0,017 | 1,71E-21 | MAC | Fabp5    |
| Plcg2    | 1,25E-25 | 0,660951769 | 0,469 | 0,017 | 1,98E-21 | MAC | Plcg2    |
| Slc43a2  | 1,29E-25 | 0,635968875 | 0,667 | 0,103 | 2,04E-21 | MAC | Slc43a2  |
| Tnfsf13b | 1,60E-25 | 0,737616777 | 0,407 | 0     | 2,54E-21 | MAC | Tnfsf13b |
| Pag1     | 1,60E-25 | 0,347251411 | 0,407 | 0     | 2,54E-21 | MAC | Pag1     |
| Dab2     | 2,06E-25 | 1,346638505 | 0,926 | 0,492 | 3,26E-21 | MAC | Dab2     |
| Syng1    | 2,13E-25 | 0,476112442 | 0,42  | 0,004 | 3,38E-21 | MAC | Syng1    |
| Arhgap22 | 2,78E-25 | 0,560932159 | 0,42  | 0,004 | 4,41E-21 | MAC | Arhgap22 |
| Daglb    | 3,19E-25 | 0,771501764 | 0,519 | 0,037 | 5,05E-21 | MAC | Daglb    |
| Zfp991   | 3,63E-25 | 0,38643859  | 0,593 | 0,062 | 5,75E-21 | MAC | Zfp991   |
| Cd63     | 5,33E-25 | 1,30519191  | 0,951 | 0,595 | 8,45E-21 | MAC | Cd63     |
| Dnase2a  | 5,48E-25 | 0,613567353 | 0,519 | 0,037 | 8,69E-21 | MAC | Dnase2a  |
| Scpep1   | 5,65E-25 | 0,761035765 | 0,79  | 0,165 | 8,96E-21 | MAC | Scpep1   |
| Snx20    | 6,89E-25 | 0,603895727 | 0,481 | 0,029 | 1,09E-20 | MAC | Snx20    |
| Chd9     | 7,98E-25 | 0,687602891 | 0,951 | 0,43  | 1,27E-20 | MAC | Chd9     |
| Sash3    | 1,01E-24 | 0,586670948 | 0,395 | 0     | 1,60E-20 | MAC | Sash3    |
| Cd300ld  | 1,01E-24 | 0,336144078 | 0,395 | 0     | 1,60E-20 | MAC | Cd300ld  |
| Pik3cd   | 1,30E-24 | 0,684825339 | 0,407 | 0,004 | 2,05E-20 | MAC | Pik3cd   |
| Lrmp     | 1,33E-24 | 0,516033805 | 0,407 | 0,004 | 2,11E-20 | MAC | Lrmp     |
| Kcnn4    | 1,56E-24 | 0,674958892 | 0,407 | 0,004 | 2,48E-20 | MAC | Kcnn4    |
| Cxcl2    | 1,59E-24 | 1,195320277 | 0,42  | 0,008 | 2,53E-20 | MAC | Cxcl2    |
| Cd300a   | 1,73E-24 | 0,506783022 | 0,444 | 0,017 | 2,74E-20 | MAC | Cd300a   |
| Id2      | 2,40E-24 | 1,296325932 | 0,827 | 0,277 | 3,81E-20 | MAC | Id2      |
| Ppm1h    | 5,17E-24 | 0,655674662 | 0,63  | 0,091 | 8,20E-20 | MAC | Ppm1h    |
| Slc9a3r1 | 6,01E-24 | 0,666075571 | 0,481 | 0,029 | 9,53E-20 | MAC | Slc9a3r1 |
| Sor1     | 6,27E-24 | 0,497958317 | 0,383 | 0     | 9,93E-20 | MAC | Sor1     |
| Gcnt1    | 6,27E-24 | 0,36546244  | 0,383 | 0     | 9,93E-20 | MAC | Gcnt1    |
| Pla2g15  | 7,16E-24 | 0,523222522 | 0,457 | 0,021 | 1,13E-19 | MAC | Pla2g15  |
| Pfkfb4   | 8,91E-24 | 0,475324266 | 0,395 | 0,004 | 1,41E-19 | MAC | Pfkfb4   |
| Gpr34    | 9,40E-24 | 0,701872507 | 0,395 | 0,004 | 1,49E-19 | MAC | Gpr34    |
| Egr2     | 9,43E-24 | 0,940208335 | 0,432 | 0,017 | 1,50E-19 | MAC | Egr2     |
| Tnfaip8  | 1,09E-23 | 0,914377619 | 0,765 | 0,186 | 1,73E-19 | MAC | Tnfaip8  |
| Tnf      | 1,11E-23 | 0,938191585 | 0,407 | 0,008 | 1,76E-19 | MAC | Tnf      |
| Osm      | 3,85E-23 | 0,823072714 | 0,37  | 0     | 6,11E-19 | MAC | Osm      |
| Cyp27a1  | 3,85E-23 | 0,713416811 | 0,37  | 0     | 6,11E-19 | MAC | Cyp27a1  |
| Scimp    | 3,85E-23 | 0,66422555  | 0,37  | 0     | 6,11E-19 | MAC | Scimp    |
| Arhgap4  | 3,85E-23 | 0,49667114  | 0,37  | 0     | 6,11E-19 | MAC | Arhgap4  |
| Slamf7   | 3,85E-23 | 0,433141015 | 0,37  | 0     | 6,11E-19 | MAC | Slamf7   |
| Lgals3bp | 4,49E-23 | 1,092193382 | 0,926 | 0,384 | 7,11E-19 | MAC | Lgals3bp |
| Snx18    | 4,82E-23 | 0,730944186 | 0,543 | 0,066 | 7,63E-19 | MAC | Snx18    |
| Asah1    | 4,94E-23 | 0,999397526 | 0,951 | 0,508 | 7,83E-19 | MAC | Asah1    |
| Esr1     | 5,93E-23 | 0,580748083 | 0,556 | 0,066 | 9,41E-19 | MAC | Esr1     |
| Pim1     | 6,99E-23 | 0,306871403 | 0,815 | 0,248 | 1,11E-18 | MAC | Pim1     |
| Ar14c    | 7,36E-23 | 0,627292835 | 0,58  | 0,079 | 1,17E-18 | MAC | Ar14c    |
| Cadm1    | 9,60E-23 | 0,62633455  | 0,543 | 0,058 | 1,52E-18 | MAC | Cadm1    |
| Dse      | 1,54E-22 | 0,388360609 | 0,407 | 0,012 | 2,44E-18 | MAC | Dse      |
| Gpsm3    | 2,14E-22 | 0,40707025  | 0,667 | 0,136 | 3,40E-18 | MAC | Gpsm3    |
| Msrb1    | 2,19E-22 | 0,303364052 | 0,802 | 0,306 | 3,48E-18 | MAC | Msrb1    |
| C4b      | 2,34E-22 | 0,710978666 | 0,358 | 0     | 3,72E-18 | MAC | C4b      |
| Tlr1     | 2,34E-22 | 0,67315276  | 0,358 | 0     | 3,72E-18 | MAC | Tlr1     |
| Pik3r5   | 2,34E-22 | 0,549391712 | 0,358 | 0     | 3,72E-18 | MAC | Pik3r5   |
| Ptpn22   | 2,34E-22 | 0,434309744 | 0,358 | 0     | 3,72E-18 | MAC | Ptpn22   |
| Wdfy4    | 2,55E-22 | 0,504190759 | 0,444 | 0,025 | 4,04E-18 | MAC | Wdfy4    |

|         |             |             |       |       |   |   |         |
|---------|-------------|-------------|-------|-------|---|---|---------|
| Cdr2l   | 0,000437714 | 0,365629767 | 0,589 | 0,386 | 1 | 0 | Cdr2l   |
| Tspan5  | 0,00044374  | 0,303447469 | 0,358 | 0,189 | 1 | 0 | Tspan5  |
| Sorbs2  | 0,000446037 | 0,322025032 | 0,547 | 0,351 | 1 | 0 | Sorbs2  |
| Eogt    | 0,000466552 | 0,55309757  | 0,568 | 0,373 | 1 | 0 | Eogt    |
| Fam63a  | 0,000496867 | 0,328072977 | 0,484 | 0,303 | 1 | 0 | Fam63a  |
| Yb1     | 0,000510261 | 0,301973322 | 0,937 | 0,952 | 1 | 0 | Yb1     |
| Tspan13 | 0,000529028 | 0,566830712 | 0,589 | 0,417 | 1 | 0 | Tspan13 |
| Nck1    | 0,000540894 | 0,363930391 | 0,495 | 0,325 | 1 | 0 | Nck1    |
| Fli1    | 0,00056668  | 0,482014207 | 0,905 | 0,825 | 1 | 0 | Fli1    |
| Timpt1  | 0,000603247 | 0,25001302  | 0,442 | 0,276 | 1 | 0 | Timpt1  |
| Pdia3   | 0,000705182 | 0,293079919 | 0,958 | 0,961 | 1 | 0 | Pdia3   |
| Als2cl  | 0,000725488 | 0,275538634 | 0,326 | 0,167 | 1 | 0 | Als2cl  |
| Malat1  | 0,000732849 | 0,427893197 | 1     | 0,996 | 1 | 0 | Malat1  |
| Fz2d    | 0,000741442 | 0,300482452 | 0,421 | 0,25  | 1 | 0 | Fz2d    |
| Pro1    | 0,000847969 | 0,466408979 | 0,6   | 0,443 | 1 | 0 | Pro1    |
| Tnfaip1 | 0,00086154  | 0,29941525  | 0,811 | 0,627 | 1 | 0 | Tnfaip1 |
| Gem     | 0,000924115 | 0,290103526 | 0,316 | 0,154 | 1 | 0 | Gem     |
| Kank3   | 0,000942144 | 0,410702686 | 0,621 | 0,421 | 1 | 0 | Kank3   |
| Luzp1   | 0,000955239 | 0,398114495 | 0,716 | 0,627 | 1 | 0 | Luzp1   |
| Lpcat3  | 0,000982687 | 0,320037629 | 0,379 | 0,215 | 1 | 0 | Lpcat3  |
| Tsc22d3 | 0,000990306 | 0,418887077 | 0,695 | 0,5   |   |   |         |

|               |          |             |       |       |          |     |               |
|---------------|----------|-------------|-------|-------|----------|-----|---------------|
| Ang           | 3,07E-22 | 0,531061683 | 0,457 | 0,033 | 4,87E-18 | MAC | Ang           |
| Was           | 3,82E-22 | 0,336419105 | 0,395 | 0,012 | 6,06E-18 | MAC | Was           |
| Gpx3          | 5,36E-22 | 0,965896029 | 0,741 | 0,186 | 8,50E-18 | MAC | Gpx3          |
| Rps6ka1       | 5,65E-22 | 0,685936274 | 0,63  | 0,107 | 8,95E-18 | MAC | Rps6ka1       |
| Cstb          | 1,09E-21 | 0,962951432 | 0,951 | 0,657 | 1,72E-17 | MAC | Cstb          |
| Vcam1         | 1,14E-21 | 1,26914205  | 0,716 | 0,174 | 1,81E-17 | MAC | Vcam1         |
| Ppcdc         | 1,37E-21 | 0,843662871 | 0,593 | 0,099 | 2,17E-17 | MAC | Ppcdc         |
| Cmtm7         | 1,40E-21 | 0,785647478 | 0,753 | 0,215 | 2,22E-17 | MAC | Cmtm7         |
| Il1b          | 1,41E-21 | 1,172471008 | 0,346 | 0     | 2,24E-17 | MAC | Il1b          |
| Fam46c        | 1,41E-21 | 0,651824784 | 0,346 | 0     | 2,24E-17 | MAC | Fam46c        |
| P2ry14        | 1,41E-21 | 0,565459209 | 0,346 | 0     | 2,24E-17 | MAC | P2ry14        |
| Klra17        | 1,41E-21 | 0,522474672 | 0,346 | 0     | 2,24E-17 | MAC | Klra17        |
| Abhd15        | 1,41E-21 | 0,445438485 | 0,346 | 0     | 2,24E-17 | MAC | Abhd15        |
| I830077J02Rik | 1,41E-21 | 0,303579479 | 0,346 | 0     | 2,24E-17 | MAC | I830077J02Rik |
| Tmem86a       | 1,73E-21 | 0,710968724 | 0,654 | 0,12  | 2,75E-17 | MAC | Tmem86a       |
| Tspan32       | 2,03E-21 | 0,517061799 | 0,358 | 0,004 | 3,21E-17 | MAC | Tspan32       |
| Adssl1        | 2,76E-21 | 0,674850795 | 0,395 | 0,017 | 4,38E-17 | MAC | Adssl1        |
| Ptgs1         | 3,59E-21 | 1,004198622 | 0,679 | 0,153 | 5,69E-17 | MAC | Ptgs1         |
| P2rx4         | 3,64E-21 | 0,958053931 | 0,741 | 0,223 | 5,78E-17 | MAC | P2rx4         |
| Tmsb4x        | 3,78E-21 | 0,524215299 | 1     | 1     | 5,99E-17 | MAC | Tmsb4x        |
| Blvr          | 4,16E-21 | 0,595817096 | 0,667 | 0,136 | 6,59E-17 | MAC | Blvr          |
| Soahc         | 8,27E-21 | 0,597567389 | 0,444 | 0,033 | 1,31E-16 | MAC | Soahc         |
| Arhgap24      | 8,41E-21 | 0,388451462 | 0,333 | 0     | 1,33E-16 | MAC | Arhgap24      |
| Pstpip1       | 8,41E-21 | 0,362602899 | 0,333 | 0     | 1,33E-16 | MAC | Pstpip1       |
| Clec4d        | 8,41E-21 | 0,323312751 | 0,333 | 0     | 1,33E-16 | MAC | Clec4d        |
| Lamp1         | 9,83E-21 | 0,80039046  | 1     | 0,893 | 1,56E-16 | MAC | Lamp1         |
| B3gnt8        | 9,99E-21 | 0,568065754 | 0,494 | 0,066 | 1,58E-16 | MAC | B3gnt8        |
| Uap111        | 1,07E-20 | 0,807724392 | 0,494 | 0,058 | 1,70E-16 | MAC | Uap111        |
| Rnaset2a      | 1,09E-20 | 0,481170359 | 0,951 | 0,471 | 1,73E-16 | MAC | Rnaset2a      |
| Al662270      | 1,57E-20 | 0,43863666  | 0,432 | 0,033 | 2,48E-16 | MAC | Al662270      |
| Gltp          | 1,81E-20 | 0,899557904 | 0,815 | 0,31  | 2,87E-16 | MAC | Gltp          |
| Akna          | 2,02E-20 | 0,577668582 | 0,494 | 0,054 | 3,21E-16 | MAC | Akna          |
| Srgn          | 3,25E-20 | 1,041232525 | 0,963 | 0,736 | 5,16E-16 | MAC | Srgn          |
| Cysl1r1       | 3,48E-20 | 0,562471883 | 0,383 | 0,017 | 5,51E-16 | MAC | Cysl1r1       |
| P2ry13        | 4,96E-20 | 0,525826406 | 0,321 | 0     | 7,87E-16 | MAC | P2ry13        |
| Lilra5        | 4,96E-20 | 0,443206512 | 0,321 | 0     | 7,87E-16 | MAC | Lilra5        |
| Accs1         | 4,96E-20 | 0,427991117 | 0,321 | 0     | 7,87E-16 | MAC | Accs1         |
| Cndp2         | 5,18E-20 | 0,959349471 | 0,84  | 0,314 | 8,21E-16 | MAC | Cndp2         |
| Ptpn18        | 7,08E-20 | 0,621629777 | 0,901 | 0,5   | 1,12E-15 | MAC | Ptpn18        |
| Ccdc88b       | 7,08E-20 | 0,292537393 | 0,333 | 0,004 | 1,27E-15 | MAC | Ccdc88b       |
| Eps8          | 1,04E-19 | 0,311074945 | 0,333 | 0,004 | 1,65E-15 | MAC | Eps8          |
| Ppt1          | 1,50E-19 | 0,966749552 | 0,914 | 0,421 | 2,37E-15 | MAC | Ppt1          |
| Pik3cg        | 1,52E-19 | 0,48954774  | 0,481 | 0,054 | 2,41E-15 | MAC | Pik3cg        |
| Soat1         | 1,76E-19 | 0,468381438 | 0,778 | 0,215 | 2,79E-15 | MAC | Soat1         |
| Neur13        | 1,85E-19 | 0,672542852 | 0,593 | 0,107 | 3,02E-15 | MAC | Neur13        |
| Ccnd2         | 2,14E-19 | 0,591870319 | 0,432 | 0,037 | 3,40E-15 | MAC | Ccnd2         |
| Slc37a2       | 2,75E-19 | 0,455059437 | 0,383 | 0,021 | 4,36E-15 | MAC | Slc37a2       |
| Rasal3        | 2,90E-19 | 0,529944769 | 0,309 | 0     | 4,59E-15 | MAC | Rasal3        |
| Tlr8          | 2,90E-19 | 0,49041397  | 0,309 | 0     | 4,59E-15 | MAC | Tlr8          |
| Btk           | 2,90E-19 | 0,398201553 | 0,309 | 0     | 4,59E-15 | MAC | Btk           |
| Gm26740       | 2,90E-19 | 0,346443608 | 0,309 | 0     | 4,59E-15 | MAC | Gm26740       |
| Dcxr          | 2,92E-19 | 0,427762424 | 0,457 | 0,045 | 4,63E-15 | MAC | Dcxr          |
| Smm3          | 3,36E-19 | 0,622848311 | 0,457 | 0,045 | 5,33E-15 | MAC | Smm3          |
| Irs2          | 4,52E-19 | 0,304990634 | 0,321 | 0,004 | 7,17E-15 | MAC | Irs2          |
| Lyl1          | 4,89E-19 | 0,696506323 | 0,506 | 0,079 | 7,75E-15 | MAC | Lyl1          |
| Lacc1         | 5,98E-19 | 0,517177254 | 0,395 | 0,029 | 9,48E-15 | MAC | Lacc1         |
| Dok3          | 6,36E-19 | 0,850796404 | 0,778 | 0,293 | 1,01E-14 | MAC | Dok3          |
| Timp2         | 8,10E-19 | 0,640926194 | 0,642 | 0,149 | 1,28E-14 | MAC | Timp2         |
| Cyfp2         | 8,40E-19 | 0,266014314 | 0,321 | 0,004 | 1,33E-14 | MAC | Cyfp2         |
| Rhoh          | 9,49E-19 | 0,542404648 | 0,346 | 0,012 | 1,50E-14 | MAC | Rhoh          |
| Hivep3        | 1,13E-18 | 0,42617658  | 0,469 | 0,054 | 1,80E-14 | MAC | Hivep3        |
| Rhog          | 1,20E-18 | 0,758091983 | 0,963 | 0,562 | 1,90E-14 | MAC | Rhog          |
| Gpr171        | 1,68E-18 | 0,588052816 | 0,296 | 0     | 2,66E-14 | MAC | Gpr171        |
| Myo1g         | 1,68E-18 | 0,48580086  | 0,296 | 0     | 2,66E-14 | MAC | Myo1g         |
| Galnt6        | 1,68E-18 | 0,477593558 | 0,296 | 0     | 2,66E-14 | MAC | Galnt6        |
| Ikbk          | 1,68E-18 | 0,415045879 | 0,296 | 0     | 2,66E-14 | MAC | Ikbk          |
| Dennd1c       | 1,68E-18 | 0,381452333 | 0,296 | 0     | 2,66E-14 | MAC | Dennd1c       |
| Atp1a3        | 1,68E-18 | 0,308285402 | 0,296 | 0     | 2,66E-14 | MAC | Atp1a3        |
| Rplp1         | 1,91E-18 | 0,4786856   | 1     | 0,988 | 3,03E-14 | MAC | Rplp1         |
| Csk           | 2,82E-18 | 0,684396563 | 0,728 | 0,219 | 4,47E-14 | MAC | Csk           |
| Il4ra         | 3,01E-18 | 0,851831436 | 0,753 | 0,223 | 4,78E-14 | MAC | Il4ra         |
| Junb          | 3,33E-18 | 0,972479719 | 0,963 | 0,686 | 5,28E-14 | MAC | Junb          |
| Arg1          | 3,35E-18 | 1,56571763  | 0,321 | 0,008 | 5,31E-14 | MAC | Arg1          |
| Kctd12        | 3,88E-18 | 0,713023622 | 0,704 | 0,202 | 6,14E-14 | MAC | Kctd12        |
| Dtx4          | 3,92E-18 | 0,357952817 | 0,395 | 0,029 | 6,21E-14 | MAC | Dtx4          |
| B3gnt7        | 4,29E-18 | 0,29619881  | 0,321 | 0,008 | 6,80E-14 | MAC | B3gnt7        |
| Lyn           | 4,61E-18 | 0,857210201 | 0,938 | 0,537 | 7,31E-14 | MAC | Lyn           |
| Tmem37        | 6,50E-18 | 0,795621974 | 0,728 | 0,244 | 1,03E-13 | MAC | Tmem37        |
| Pitpnm1       | 6,74E-18 | 0,666624923 | 0,42  | 0,045 | 1,07E-13 | MAC | Pitpnm1       |
| Hcls1         | 7,00E-18 | 0,681283415 | 0,901 | 0,409 | 1,11E-13 | MAC | Hcls1         |
| Sh3pdx2b      | 7,33E-18 | 0,687197637 | 0,617 | 0,161 | 1,16E-13 | MAC | Sh3pdx2b      |
| Pnpla7        | 7,50E-18 | 0,334212043 | 0,407 | 0,037 | 1,19E-13 | MAC | Pnpla7        |
| Abr           | 7,54E-18 | 0,444957859 | 0,617 | 0,128 | 1,20E-13 | MAC | Abr           |
| S430427019Rik | 9,59E-18 | 0,596711118 | 0,284 | 0     | 1,52E-13 | MAC | S430427019Rik |
| Tnfrs9        | 9,59E-18 | 0,3803071   | 0,284 | 0     | 1,52E-13 | MAC | Tnfrs9        |
| Il21r         | 9,59E-18 | 0,360762191 | 0,284 | 0     | 1,52E-13 | MAC | Il21r         |
| Shtn1         | 9,59E-18 | 0,295439637 | 0,284 | 0     | 1,52E-13 | MAC | Shtn1         |
| Nlrp3         | 9,59E-18 | 0,26010347  | 0,284 | 0     | 1,52E-13 | MAC | Nlrp3         |
| Gpr183        | 1,01E-17 | 0,492959763 | 0,469 | 0,058 | 1,60E-13 | MAC | Gpr183        |
| Mlxip         | 1,05E-17 | 0,604818629 | 0,605 | 0,128 | 1,66E-13 | MAC | Mlxip         |
| Ccr12         | 1,20E-17 | 1,032785251 | 0,568 | 0,124 | 1,90E-13 | MAC | Ccr12         |
| Ptger4        | 1,51E-17 | 0,535734658 | 0,296 | 0,004 | 2,40E-13 | MAC | Ptger4        |
| Gm9843        | 1,52E-17 | 0,446390455 | 1     | 0,988 | 2,41E-13 | MAC | Gm9843        |
| Gas6          | 2,04E-17 | 0,768216389 | 0,432 | 0,05  | 3,23E-13 | MAC | Gas6          |
| Rasgef1b      | 2,19E-17 | 0,456818573 | 0,432 | 0,045 | 3,46E-13 | MAC | Rasgef1b      |
| Gmp           | 2,21E-17 | 0,50334324  | 0,457 | 0,058 | 3,51E-13 | MAC | Gmp           |
| Trex1         | 2,52E-17 | 0,641870459 | 0,494 | 0,083 | 3,99E-13 | MAC | Trex1         |
| Tnfrs13b      | 2,72E-17 | 0,452468117 | 0,296 | 0,004 | 4,32E-13 | MAC | Tnfrs13b      |
| Cry1          | 3,04E-17 | 0,304046136 | 0,383 | 0,029 | 4,82E-13 | MAC | Cry1          |
| Egr1          | 3,06E-17 | 1,103825904 | 0,765 | 0,298 | 4,85E-13 | MAC | Egr1          |
| Myo5a         | 3,27E-17 | 0,67561715  | 0,605 | 0,14  | 5,18E-13 | MAC | Myo5a         |
| Ppp1r21       | 3,74E-17 | 0,481426419 | 0,519 | 0,083 | 5,93E-13 | MAC | Ppp1r21       |
| Rnf130        | 3,78E-17 | 0,601648237 | 0,765 | 0,285 | 6,00E-13 | MAC | Rnf130        |
| Lcp1          | 3,85E-17 | 0,874187342 | 0,975 | 0,719 | 6,10E-13 | MAC | Lcp1          |
| Irf2bp2       | 3,91E-17 | 0,476537671 | 0,704 | 0,219 | 6,20E-13 | MAC | Irf2bp2       |
| Gusb          | 4,24E-17 | 0,940811342 | 0,864 | 0,463 | 6,72E-13 | MAC | Gusb          |
| Cta           | 4,41E-17 | 0,715709448 | 0,963 | 0,694 | 6,99E-13 | MAC | Cta           |
| Emp3          | 5,00E-17 | 0,656386728 | 0,852 | 0,343 | 7,93E-13 | MAC | Emp3          |
| Ccl8          | 5,44E-17 | 1,154760223 | 0,272 | 0     | 8,62E-13 | MAC | Ccl8          |
| Ap1b1         | 6,04E-17 | 0,731000105 | 0,704 | 0,223 | 9,58E-13 | MAC | Ap1b1         |
| B2m           | 6,16E-17 | 0,505602121 | 1     | 1     | 9,76E-13 | MAC | B2m           |
| 1700017B05Rik | 6,80E-17 | 0,775383546 | 0,556 | 0,124 | 1,08E-12 | MAC | 1700017B05Rik |
| Fam134b       | 7,82E-17 | 0,381311619 | 0,333 | 0,017 | 1,24E-12 | MAC | Fam134b       |
| 1810011H11Rik | 8,74E-17 | 0,384323324 | 0,284 | 0,004 | 1,39E-12 | MAC | 1810011H11Rik |
| Tnfrs13       | 1,05E-16 | 0,437969132 | 0,383 | 0,037 | 1,67E-12 | MAC | Tnfrs13       |
| Paox          | 1,09E-16 | 0,395249477 | 0,432 | 0,062 | 1,72E-12 | MAC | Paox          |
| Atf3          | 1,28E-16 | 1,028513801 | 0,63  | 0,165 | 2,03E-12 | MAC | Atf3          |
| Phf11b        | 1,43E-16 | 0,60805462  | 0,432 | 0,058 | 2,27E-12 | MAC | Phf11b        |
| Erp29         | 1,80E-16 | 0,645234386 | 0,901 | 0,504 | 2,85E-12 | MAC | Erp29         |
| Rap2b         | 2,14E-16 | 0,662673498 | 0,864 | 0,533 | 3,40E-12 | MAC | Rap2b         |

|         |          |             |       |       |          |   |         |
|---------|----------|-------------|-------|-------|----------|---|---------|
| Cd53    | 1,57E-61 | 1,85537111  | 0,988 | 0,045 | 2,49E-57 | 1 | Cd53    |
| Ptpn6   | 2,74E-61 | 1,607331114 | 0,914 | 0,008 | 4,35E-57 | 1 | Ptpn6   |
| Clec4a2 | 4,65E-61 | 1,513908845 | 0,901 | 0,004 | 7,37E-57 | 1 | Clec4a2 |
| Lrp1    | 5,38E-61 | 1,668389423 | 0,914 | 0,008 | 8,53E-57 | 1 | Lrp1    |
| Fermt3  | 6,14E-61 | 1,49298526  | 0,901 | 0,004 | 9,73E-57 | 1 | Fermt3  |
| Csf2ra  | 7,19E-61 | 1,317595911 | 0,938 | 0,025 | 1,14E-56 | 1 | Csf2ra  |
| Msa4a4  | 1,04E-60 | 1,521905739 | 0,889 | 0     | 1,65E-56 | 1 | Msa4a4  |
| Ccl6    | 1,04E-60 | 1,516975938 | 0,889 | 0     | 1,65E-56 | 1 | Ccl6    |
| Fcgr4   | 1,12E-60 | 1,79610778  | 0,914 | 0,008 | 1,77E-56 | 1 | Fcgr4   |
| Fcer1g  | 2,14E-60 | 3,44213885  | 1     | 0,083 | 3,40E-56 | 1 | Fcer1g  |
| Adgre1  | 4,91E-60 | 1,58175684  | 0,889 | 0,004 | 7,79E-56 | 1 | Adgre1  |
| Wfdc17  | 8,83E-60 | 2,040118947 | 0,901 | 0,012 | 1,40E-55 | 1 | Wfdc17  |
| Clec12a | 1,07E-59 | 1,508464223 | 0,877 | 0     | 1,69E-55 | 1 | Clec12a |
| Rac2    | 2,29E-59 | 1,650161882 | 0,889 | 0,008 | 3,63E-55 | 1 | Rac2    |
| Fam105a | 5,12E-59 | 1,499573611 | 0,877 | 0,004 | 8,11E-55 | 1 | Fam105a |
| Iltg2   | 1,08E-58 | 1,545172129 | 0,864 | 0     | 1,71E-54 | 1 | Iltg2   |
| Lair1   | 1,08E-58 | 1,427215962 | 0,864 | 0     | 1,71E-54 | 1 | Lair1   |
| Xcl16   | 2,81E-58 | 2,227180165 | 1     | 0,091 | 4,45E-54 | 1 | Xcl16   |
| Csar1   | 5,41E-58 | 1,676653978 | 0,864 | 0,004 | 8,58E-54 | 1 | Csar1   |
| Clec4n  | 1,07E-57 | 1,596936596 | 0,852 | 0     |          |   |         |

|               |          |             |       |       |          |     |               |
|---------------|----------|-------------|-------|-------|----------|-----|---------------|
| Nampt         | 2,41E-16 | 0,727924815 | 0,716 | 0,231 | 3,82E-12 | MAC | Nampt         |
| Ckb           | 2,65E-16 | 0,919194369 | 0,778 | 0,226 | 4,20E-12 | MAC | Ckb           |
| Skap2         | 2,76E-16 | 0,622818388 | 0,765 | 0,277 | 4,38E-12 | MAC | Skap2         |
| Ill1m         | 3,05E-16 | 0,711378733 | 0,259 | 0     | 4,84E-12 | MAC | Ill1m         |
| Trpm2         | 3,05E-16 | 0,544577763 | 0,259 | 0     | 4,84E-12 | MAC | Trpm2         |
| Cd244         | 3,05E-16 | 0,427697384 | 0,259 | 0     | 4,84E-12 | MAC | Cd244         |
| Psd4          | 3,05E-16 | 0,409419758 | 0,259 | 0     | 4,84E-12 | MAC | Psd4          |
| Vill          | 3,05E-16 | 0,379542702 | 0,259 | 0     | 4,84E-12 | MAC | Vill          |
| Rnf150        | 3,05E-16 | 0,253934024 | 0,259 | 0     | 4,84E-12 | MAC | Rnf150        |
| Hcst          | 4,27E-16 | 0,302186009 | 0,481 | 0,083 | 6,77E-12 | MAC | Hcst          |
| Ccr2          | 4,87E-16 | 0,684310477 | 0,272 | 0,004 | 7,72E-12 | MAC | Ccr2          |
| Mknk1         | 5,36E-16 | 0,538016491 | 0,568 | 0,132 | 8,50E-12 | MAC | Mknk1         |
| Sdf211        | 5,96E-16 | 0,510732026 | 0,704 | 0,207 | 9,45E-12 | MAC | Sdf211        |
| Lrch4         | 6,16E-16 | 0,643674174 | 0,63  | 0,182 | 9,76E-12 | MAC | Lrch4         |
| Atp8a1        | 6,27E-16 | 0,343750138 | 0,556 | 0,112 | 9,94E-12 | MAC | Atp8a1        |
| Rpl10-ps3     | 6,71E-16 | 0,503409129 | 1     | 0,921 | 1,06E-11 | MAC | Rpl10-ps3     |
| Trpv2         | 7,28E-16 | 0,61375328  | 0,407 | 0,058 | 1,15E-11 | MAC | Trpv2         |
| Epst11        | 7,57E-16 | 0,469595964 | 0,407 | 0,05  | 1,20E-11 | MAC | Epst11        |
| Cln8          | 7,70E-16 | 0,563221072 | 0,531 | 0,103 | 1,22E-11 | MAC | Cln8          |
| Plxnb2        | 8,64E-16 | 0,8664309   | 0,753 | 0,293 | 1,37E-11 | MAC | Plxnb2        |
| N4bp211       | 1,11E-15 | 0,400397317 | 0,284 | 0,008 | 1,76E-11 | MAC | N4bp211       |
| Gm29216       | 1,17E-15 | 0,542367253 | 1     | 1     | 1,85E-11 | MAC | Gm29216       |
| Sgpl1         | 1,19E-15 | 0,657117666 | 0,667 | 0,215 | 1,89E-11 | MAC | Sgpl1         |
| Creb5         | 1,21E-15 | 0,382026432 | 0,383 | 0,041 | 1,92E-11 | MAC | Creb5         |
| Inpp5d        | 1,23E-15 | 0,741392624 | 0,901 | 0,517 | 1,96E-11 | MAC | Inpp5d        |
| Rab20         | 1,38E-15 | 0,685717148 | 0,42  | 0,058 | 2,18E-11 | MAC | Rab20         |
| Pgd           | 1,52E-15 | 0,52444206  | 0,802 | 0,306 | 2,41E-11 | MAC | Pgd           |
| Ldhb          | 1,61E-15 | 0,565261504 | 0,358 | 0,033 | 2,56E-11 | MAC | Ldhb          |
| Sp110         | 2,14E-15 | 0,575952333 | 0,654 | 0,182 | 3,39E-11 | MAC | Sp110         |
| Sh3bp2        | 2,29E-15 | 0,313881132 | 0,481 | 0,083 | 3,63E-11 | MAC | Sh3bp2        |
| Gm5150        | 2,75E-15 | 0,33877016  | 0,259 | 0,004 | 4,37E-11 | MAC | Gm5150        |
| Gdf3          | 3,94E-15 | 0,841966805 | 0,296 | 0,017 | 6,24E-11 | MAC | Gdf3          |
| Hk3           | 4,12E-15 | 0,359976259 | 0,259 | 0,004 | 6,53E-11 | MAC | Hk3           |
| Spon1         | 5,08E-15 | 0,369231045 | 0,272 | 0,008 | 8,05E-11 | MAC | Spon1         |
| Ilgap2        | 5,20E-15 | 0,300328243 | 0,272 | 0,008 | 8,24E-11 | MAC | Ilgap2        |
| Fgd4          | 5,36E-15 | 0,253209369 | 0,321 | 0,025 | 8,50E-11 | MAC | Fgd4          |
| Syk           | 5,56E-15 | 0,393628744 | 0,506 | 0,103 | 8,81E-11 | MAC | Syk           |
| Slc29a3       | 6,02E-15 | 0,563428806 | 0,444 | 0,074 | 9,55E-11 | MAC | Slc29a3       |
| Dhrs3         | 6,22E-15 | 0,742196147 | 0,741 | 0,298 | 9,86E-11 | MAC | Dhrs3         |
| Usp2          | 7,53E-15 | 0,369816958 | 0,296 | 0,017 | 1,19E-10 | MAC | Usp2          |
| Grk2          | 8,91E-15 | 0,644933194 | 0,765 | 0,318 | 1,41E-10 | MAC | Grk2          |
| Fam46a        | 9,34E-15 | 0,452056672 | 0,346 | 0,033 | 1,48E-10 | MAC | Fam46a        |
| Mt2           | 1,00E-14 | 0,32885324  | 0,432 | 0,066 | 1,58E-10 | MAC | Mt2           |
| Cd37          | 1,22E-14 | 0,256594967 | 0,284 | 0,012 | 1,94E-10 | MAC | Cd37          |
| Rps9          | 1,26E-14 | 0,463912496 | 1     | 0,959 | 2,00E-10 | MAC | Rps9          |
| Sh3bgr13      | 1,33E-14 | 0,511549595 | 0,988 | 0,955 | 2,10E-10 | MAC | Sh3bgr13      |
| Rplp2         | 1,59E-14 | 0,43557302  | 1     | 0,971 | 2,51E-10 | MAC | Rplp2         |
| Plk3          | 1,72E-14 | 0,732739522 | 0,481 | 0,103 | 2,73E-10 | MAC | Plk3          |
| Hebp1         | 1,89E-14 | 0,510041106 | 0,679 | 0,236 | 3,19E-10 | MAC | Hebp1         |
| Arpc2         | 2,18E-14 | 0,538401095 | 1     | 0,934 | 3,45E-10 | MAC | Arpc2         |
| Cfb           | 2,25E-14 | 0,91965093  | 0,63  | 0,186 | 3,56E-10 | MAC | Cfb           |
| Lamtor4       | 2,60E-14 | 0,436108828 | 0,741 | 0,31  | 4,12E-10 | MAC | Lamtor4       |
| Adamts14      | 2,73E-14 | 0,494964011 | 0,284 | 0,017 | 4,33E-10 | MAC | Adamts14      |
| Nmt1          | 3,00E-14 | 0,511115036 | 0,938 | 0,595 | 4,75E-10 | MAC | Nmt1          |
| Grina         | 3,37E-14 | 0,765950615 | 0,79  | 0,372 | 5,34E-10 | MAC | Grina         |
| Rbpj          | 3,43E-14 | 0,578363677 | 0,704 | 0,264 | 5,43E-10 | MAC | Rbpj          |
| Irf8          | 4,52E-14 | 0,626553181 | 0,815 | 0,355 | 7,16E-10 | MAC | Irf8          |
| Limd2         | 4,62E-14 | 0,614563961 | 0,765 | 0,326 | 7,32E-10 | MAC | Limd2         |
| Dusp1         | 5,08E-14 | 1,103805735 | 0,877 | 0,744 | 8,06E-10 | MAC | Dusp1         |
| Ill18bp       | 5,36E-14 | 0,590276155 | 0,481 | 0,099 | 8,50E-10 | MAC | Ill18bp       |
| Ier3          | 5,78E-14 | 1,028140617 | 0,778 | 0,397 | 9,16E-10 | MAC | Ier3          |
| Stx7          | 7,18E-14 | 0,695742817 | 0,827 | 0,421 | 1,14E-09 | MAC | Stx7          |
| Cotl1         | 7,39E-14 | 0,565070912 | 0,951 | 0,57  | 1,17E-09 | MAC | Cotl1         |
| Rpl35a        | 7,44E-14 | 0,460085251 | 1     | 0,955 | 1,18E-09 | MAC | Rpl35a        |
| Adrb2         | 8,23E-14 | 0,690821824 | 0,321 | 0,029 | 1,31E-09 | MAC | Adrb2         |
| Fosb          | 8,49E-14 | 0,50847215  | 0,543 | 0,132 | 1,35E-09 | MAC | Fosb          |
| Rnf149        | 8,77E-14 | 0,625950326 | 0,469 | 0,103 | 1,39E-09 | MAC | Rnf149        |
| Rasa4         | 1,02E-13 | 0,491052565 | 0,358 | 0,045 | 1,61E-09 | MAC | Rasa4         |
| Aldh2         | 1,13E-13 | 0,528215229 | 0,432 | 0,079 | 1,79E-09 | MAC | Aldh2         |
| Ogfr11        | 1,30E-13 | 0,402116622 | 0,531 | 0,132 | 2,05E-09 | MAC | Ogfr11        |
| Stk4          | 1,72E-13 | 0,539958555 | 0,481 | 0,112 | 2,73E-09 | MAC | Stk4          |
| Rel           | 1,81E-13 | 0,602543455 | 0,494 | 0,12  | 2,86E-09 | MAC | Rel           |
| G530011O06Rik | 1,82E-13 | 0,402739018 | 0,321 | 0,033 | 2,89E-09 | MAC | G530011O06Rik |
| Snx24         | 1,85E-13 | 0,356335862 | 0,407 | 0,066 | 2,94E-09 | MAC | Snx24         |
| Oxct1         | 2,11E-13 | 0,52743885  | 0,519 | 0,132 | 3,35E-09 | MAC | Oxct1         |
| Renbp         | 2,74E-13 | 0,593152122 | 0,568 | 0,165 | 4,34E-09 | MAC | Renbp         |
| Stab1         | 3,44E-13 | 0,808652468 | 0,938 | 0,897 | 5,46E-09 | MAC | Stab1         |
| Rnaset2b      | 3,62E-13 | 0,578768571 | 0,988 | 0,744 | 5,74E-09 | MAC | Rnaset2b      |
| Gna15         | 3,73E-13 | 0,443882291 | 0,272 | 0,017 | 5,91E-09 | MAC | Gna15         |
| S100a1        | 3,85E-13 | 0,385697876 | 0,568 | 0,165 | 6,10E-09 | MAC | S100a1        |
| Mgst1         | 4,13E-13 | 0,544946181 | 0,42  | 0,079 | 6,55E-09 | MAC | Mgst1         |
| Nfe2l2        | 4,78E-13 | 0,775013045 | 0,889 | 0,529 | 7,58E-09 | MAC | Nfe2l2        |
| Extl3         | 6,66E-13 | 0,53124816  | 0,691 | 0,256 | 1,06E-08 | MAC | Extl3         |
| Lhfp12        | 6,77E-13 | 0,627004965 | 0,358 | 0,054 | 1,07E-08 | MAC | Lhfp12        |
| Dennd4b       | 8,28E-13 | 0,473687598 | 0,272 | 0,021 | 1,31E-08 | MAC | Dennd4b       |
| Hfe           | 8,72E-13 | 0,613687222 | 0,63  | 0,227 | 1,38E-08 | MAC | Hfe           |
| Mknr1         | 9,01E-13 | 0,437200793 | 0,63  | 0,207 | 1,43E-08 | MAC | Mknr1         |
| Cd302         | 1,12E-12 | 0,557097882 | 0,704 | 0,331 | 1,78E-08 | MAC | Cd302         |
| Zfp36l2       | 1,24E-12 | 0,510718524 | 0,827 | 0,455 | 1,97E-08 | MAC | Zfp36l2       |
| Coro7         | 1,32E-12 | 0,606731924 | 0,716 | 0,302 | 2,09E-08 | MAC | Coro7         |
| Plagl2        | 1,35E-12 | 0,47316562  | 0,432 | 0,091 | 2,15E-08 | MAC | Plagl2        |
| Rps25         | 1,36E-12 | 0,436130949 | 1     | 0,963 | 2,16E-08 | MAC | Rps25         |
| Ezr           | 1,43E-12 | 0,444466913 | 0,346 | 0,05  | 2,27E-08 | MAC | Ezr           |
| Pfn1          | 1,44E-12 | 0,391110037 | 1     | 0,996 | 2,29E-08 | MAC | Pfn1          |
| Pld3          | 1,46E-12 | 0,651098261 | 0,765 | 0,331 | 2,31E-08 | MAC | Pld3          |
| Ptpn1         | 1,57E-12 | 0,648909454 | 0,827 | 0,45  | 2,49E-08 | MAC | Ptpn1         |
| 1600014C10Rik | 1,94E-12 | 0,435332021 | 0,494 | 0,124 | 3,08E-08 | MAC | 1600014C10Rik |
| Frrs1         | 2,23E-12 | 0,436794436 | 0,358 | 0,054 | 3,53E-08 | MAC | Frrs1         |
| mt-Nd6        | 2,43E-12 | 0,495943928 | 1     | 0,938 | 3,85E-08 | MAC | mt-Nd6        |
| Tmem50b       | 2,45E-12 | 0,615273094 | 0,556 | 0,169 | 3,88E-08 | MAC | Tmem50b       |
| Mfsd12        | 2,99E-12 | 0,317135005 | 0,395 | 0,074 | 4,74E-08 | MAC | Mfsd12        |
| Dapp1         | 3,27E-12 | 0,461333746 | 0,321 | 0,041 | 5,19E-08 | MAC | Dapp1         |
| Dnmt3a        | 3,77E-12 | 0,39929807  | 0,543 | 0,157 | 5,97E-08 | MAC | Dnmt3a        |
| Rpl37r1       | 3,82E-12 | 0,328749956 | 1     | 0,967 | 6,05E-08 | MAC | Rpl37r1       |
| Atp6v1f       | 3,93E-12 | 0,52629993  | 0,951 | 0,702 | 6,24E-08 | MAC | Atp6v1f       |
| Etv5          | 4,01E-12 | 0,562947656 | 0,469 | 0,12  | 6,36E-08 | MAC | Etv5          |
| Pl4k2a        | 4,14E-12 | 0,440058705 | 0,383 | 0,07  | 6,56E-08 | MAC | Pl4k2a        |
| Atp6v0b       | 4,44E-12 | 0,627465194 | 0,827 | 0,467 | 7,05E-08 | MAC | Atp6v0b       |
| Epb4112       | 4,84E-12 | 0,69486121  | 0,765 | 0,384 | 7,68E-08 | MAC | Epb4112       |
| Fam213b       | 5,37E-12 | 0,335481219 | 0,296 | 0,033 | 8,52E-08 | MAC | Fam213b       |
| Vamp8         | 5,43E-12 | 0,60299128  | 0,926 | 0,711 | 8,61E-08 | MAC | Vamp8         |
| Gk            | 5,86E-12 | 0,319990012 | 0,284 | 0,029 | 9,28E-08 | MAC | Gk            |
| Snx8          | 5,97E-12 | 0,343920183 | 0,346 | 0,054 | 9,47E-08 | MAC | Snx8          |
| Klc4          | 6,54E-12 | 0,485411731 | 0,469 | 0,116 | 1,04E-07 | MAC | Klc4          |
| Fam96a        | 8,14E-12 | 0,582269561 | 0,815 | 0,434 | 1,29E-07 | MAC | Fam96a        |
| Lrp12         | 8,61E-12 | 0,287319276 | 0,259 | 0,021 | 1,36E-07 | MAC | Lrp12         |
| B3galnt1      | 1,06E-11 | 0,353528189 | 0,284 | 0,029 | 1,68E-07 | MAC | B3galnt1      |
| Mroh1         | 1,16E-11 | 0,370345061 | 0,358 | 0,062 | 1,83E-07 | MAC | Mroh1         |
| Fam234b       | 1,23E-11 | 0,347375668 | 0,321 | 0,045 | 1,96E-07 | MAC | Fam234b       |
| Samhd1        | 1,32E-11 | 0,577276734 | 0,679 | 0,264 | 2,09E-07 | MAC | Samhd1        |

|          |          |             |       |       |          |   |          |
|----------|----------|-------------|-------|-------|----------|---|----------|
| Ill10a   | 7,63E-40 | 0,902622275 | 0,617 | 0     | 1,21E-35 | 1 | Ill10a   |
| Lrrc25   | 7,63E-40 | 0,673458635 | 0,617 | 0     | 1,21E-35 | 1 | Lrrc25   |
| Emb      | 7,95E-40 | 1,216217566 | 0,642 | 0,008 | 1,26E-35 | 1 | Emb      |
| Cd74     | 1,34E-39 | 3,250433361 | 0,951 | 0,24  | 2,12E-35 | 1 | Cd74     |
| Trf      | 2,10E-39 | 2,137320354 | 0,963 | 0,326 | 3,32E-35 | 1 | Trf      |
| Ppfia4   | 5,01E-39 | 0,935285154 | 0,617 | 0,004 | 7,94E-35 | 1 | Ppfia4   |
| Bhlhe41  | 5,75E-39 | 0,793743502 | 0,667 | 0,017 | 9,12E-35 | 1 | Bhlhe41  |
| Arhgap30 | 5,84E-39 | 0,740906224 | 0,605 | 0     | 9,26E-35 | 1 | Arhgap30 |
| Lat2     | 7,18E-39 | 1,045474674 | 0,728 | 0,045 | 1,14E-34 | 1 | Lat2     |
| Cfp      | 8,85E-39 | 0,997574157 | 0,617 | 0,004 | 1,40E-34 | 1 | Cfp      |
| Prkcd    | 1,40E-38 | 1,198810565 | 0,765 | 0,066 | 2,21E-34 | 1 | Prkcd    |
| Lgmn     | 1,49E-38 | 1,686533885 | 1     | 0,897 | 2,35E-34 | 1 | Lgmn     |
| Rab31i1  | 2,08E-38 | 1,270197707 | 0,802 | 0,083 | 3,30E-34 | 1 | Rab31i1  |
| Cebpb    | 2,44E-38 | 1,020953092 | 0,802 | 0,083 | 3,88E-34 | 1 | Cebpb    |
| Man2b1   | 2,71E-38 | 1,68834718  | 0,988 | 0,401 | 4,29E-34 | 1 | Man2b1   |
| Dock10   | 3,89E-38 | 0,670253041 | 0,605 | 0,004 | 6,16E-34 | 1 | Dock10   |
| Hk2      | 3,89E-38 | 0,537198907 | 0,605 | 0,004 | 6,16E-34 | 1 | Hk2      |
| Ifi2712a | 4,05E-38 | 0,863232196 | 0,617 | 0,008 | 6,42E-34 | 1 | Ifi2712a |
| Ofilm3   | 4,07E-38 | 0,944676953 | 0,642 | 0,017 | 6,46E-34 | 1 | Ofilm3   |

|               |          |             |       |       |             |     |               |
|---------------|----------|-------------|-------|-------|-------------|-----|---------------|
| Psm8          | 1,79E-11 | 0,62020329  | 0,951 | 0,74  | 2,84E-07    | MAC | Psm8          |
| Ubash3b       | 1,83E-11 | 0,284948232 | 0,321 | 0,045 | 2,90E-07    | MAC | Ubash3b       |
| Socs3         | 1,89E-11 | 0,785208164 | 0,765 | 0,388 | 3,00E-07    | MAC | Socs3         |
| H3f3a         | 2,23E-11 | 0,515651002 | 0,975 | 0,843 | 3,53E-07    | MAC | H3f3a         |
| Psen2         | 2,25E-11 | 0,478803646 | 0,556 | 0,19  | 3,57E-07    | MAC | Psen2         |
| Aldh3b1       | 2,53E-11 | 0,388904171 | 0,296 | 0,037 | 4,01E-07    | MAC | Aldh3b1       |
| Fau           | 2,68E-11 | 0,314117353 | 1     | 0,988 | 4,25E-07    | MAC | Fau           |
| Coro1b        | 3,74E-11 | 0,701413397 | 0,889 | 0,599 | 5,92E-07    | MAC | Coro1b        |
| Hmox1         | 3,80E-11 | 0,595803795 | 0,593 | 0,223 | 6,03E-07    | MAC | Hmox1         |
| Cyp4v3        | 4,96E-11 | 0,348145221 | 0,284 | 0,033 | 7,86E-07    | MAC | Cyp4v3        |
| Lcp2          | 6,21E-11 | 0,505509481 | 0,827 | 0,364 | 9,84E-07    | MAC | Lcp2          |
| Olfm1         | 6,45E-11 | 0,28378505  | 0,333 | 0,054 | 1,02E-06    | MAC | Olfm1         |
| Tiparp        | 6,76E-11 | 0,56007753  | 0,395 | 0,091 | 1,07E-06    | MAC | Tiparp        |
| Ifi204        | 7,26E-11 | 0,710974407 | 0,531 | 0,19  | 1,15E-06    | MAC | Ifi204        |
| Gla           | 7,43E-11 | 0,259021277 | 0,321 | 0,05  | 1,18E-06    | MAC | Gla           |
| Bsc12         | 7,47E-11 | 0,440721991 | 0,543 | 0,186 | 1,18E-06    | MAC | Bsc12         |
| Rtcb          | 8,23E-11 | 0,505700893 | 0,827 | 0,409 | 1,30E-06    | MAC | Rtcb          |
| Casp1         | 9,47E-11 | 0,447189032 | 0,395 | 0,091 | 1,50E-06    | MAC | Casp1         |
| Rps24         | 9,66E-11 | 0,366724221 | 1     | 0,988 | 1,53E-06    | MAC | Rps24         |
| Znrf2         | 9,77E-11 | 0,276292022 | 0,506 | 0,157 | 1,55E-06    | MAC | Znrf2         |
| Naip5         | 1,05E-10 | 0,283946835 | 0,272 | 0,033 | 1,66E-06    | MAC | Naip5         |
| B4gal1        | 1,05E-10 | 0,52061707  | 0,889 | 0,657 | 1,66E-06    | MAC | B4gal1        |
| Rpl37         | 1,05E-10 | 0,309653305 | 1     | 0,975 | 1,66E-06    | MAC | Rpl37         |
| Man2b2        | 1,18E-10 | 0,506227063 | 0,506 | 0,157 | 1,88E-06    | MAC | Man2b2        |
| Tifa          | 1,21E-10 | 0,502810017 | 0,642 | 0,244 | 1,91E-06    | MAC | Tifa          |
| Rin2          | 1,45E-10 | 0,398051064 | 0,568 | 0,202 | 2,30E-06    | MAC | Rin2          |
| Tyk2          | 1,70E-10 | 0,271148252 | 0,284 | 0,037 | 2,69E-06    | MAC | Tyk2          |
| Slc8b1        | 1,75E-10 | 0,341325667 | 0,333 | 0,062 | 2,77E-06    | MAC | Slc8b1        |
| Fam217b       | 1,80E-10 | 0,342401797 | 0,333 | 0,062 | 2,86E-06    | MAC | Fam217b       |
| Zbtb7b        | 1,88E-10 | 0,270810632 | 0,358 | 0,074 | 2,97E-06    | MAC | Zbtb7b        |
| Rps28         | 1,94E-10 | 0,320508052 | 1     | 0,992 | 3,07E-06    | MAC | Rps28         |
| Arpc1b        | 1,96E-10 | 0,462137086 | 1     | 0,905 | 3,10E-06    | MAC | Arpc1b        |
| Sfxn5         | 2,05E-10 | 0,284802255 | 0,358 | 0,074 | 3,25E-06    | MAC | Sfxn5         |
| Ptpn7         | 2,29E-10 | 0,339500348 | 0,346 | 0,066 | 3,62E-06    | MAC | Ptpn7         |
| Gpx1          | 2,33E-10 | 0,630117103 | 1     | 0,921 | 3,69E-06    | MAC | Gpx1          |
| Rab24         | 2,41E-10 | 0,510135775 | 0,617 | 0,269 | 3,83E-06    | MAC | Rab24         |
| Rogdi         | 2,58E-10 | 0,497205869 | 0,58  | 0,223 | 4,10E-06    | MAC | Rogdi         |
| Fnip1         | 2,94E-10 | 0,387543954 | 0,444 | 0,136 | 4,66E-06    | MAC | Fnip1         |
| Pold4         | 3,16E-10 | 0,331141164 | 0,568 | 0,215 | 5,01E-06    | MAC | Pold4         |
| Ypel3         | 3,32E-10 | 0,523306983 | 0,556 | 0,211 | 5,26E-06    | MAC | Ypel3         |
| Rpl10a        | 3,35E-10 | 0,359997518 | 1     | 0,921 | 5,31E-06    | MAC | Rpl10a        |
| Taldo1        | 3,49E-10 | 0,504992913 | 0,864 | 0,603 | 5,53E-06    | MAC | Taldo1        |
| Rpl26         | 3,70E-10 | 0,332330144 | 1     | 0,963 | 5,87E-06    | MAC | Rpl26         |
| Cln7          | 4,20E-10 | 0,574743996 | 0,531 | 0,194 | 6,66E-06    | MAC | Cln7          |
| Dnase1l1      | 4,32E-10 | 0,386661687 | 0,42  | 0,107 | 6,84E-06    | MAC | Dnase1l1      |
| Fkbp2         | 4,40E-10 | 0,409685297 | 0,716 | 0,393 | 6,98E-06    | MAC | Fkbp2         |
| Al413582      | 4,44E-10 | 0,435651638 | 0,58  | 0,26  | 7,03E-06    | MAC | Al413582      |
| Oas1g         | 4,72E-10 | 0,308331101 | 0,284 | 0,041 | 7,48E-06    | MAC | Oas1g         |
| Sic35f6       | 4,75E-10 | 0,266898958 | 0,407 | 0,095 | 7,53E-06    | MAC | Sic35f6       |
| Cited2        | 6,22E-10 | 0,261250454 | 0,333 | 0,066 | 9,85E-06    | MAC | Cited2        |
| Khk           | 6,63E-10 | 0,268554416 | 0,259 | 0,033 | 1,05E-05    | MAC | Khk           |
| Ppp1r18       | 7,91E-10 | 0,466495029 | 0,815 | 0,554 | 1,25E-05    | MAC | Ppp1r18       |
| Rassf2        | 8,37E-10 | 0,265859129 | 0,667 | 0,273 | 1,33E-05    | MAC | Rassf2        |
| Plekha2       | 9,11E-10 | 0,32913824  | 0,37  | 0,083 | 1,44E-05    | MAC | Plekha2       |
| Gabarap       | 9,52E-10 | 0,465031578 | 0,975 | 0,806 | 1,51E-05    | MAC | Gabarap       |
| Pisd-ps1      | 9,61E-10 | 0,415847684 | 0,568 | 0,252 | 1,52E-05    | MAC | Pisd-ps1      |
| Nfkbi2        | 1,11E-09 | 0,803398477 | 0,63  | 0,298 | 1,67E-05    | MAC | Nfkbi2        |
| Trim8         | 1,14E-09 | 0,316832618 | 0,58  | 0,236 | 1,81E-05    | MAC | Trim8         |
| Pacs2         | 1,15E-09 | 0,326344429 | 0,444 | 0,136 | 1,82E-05    | MAC | Pacs2         |
| Gga1          | 1,17E-09 | 0,287208463 | 0,531 | 0,19  | 1,86E-05    | MAC | Gga1          |
| Kdm7a         | 1,18E-09 | 0,27440017  | 0,481 | 0,153 | 1,87E-05    | MAC | Kdm7a         |
| Atp6v1b2      | 1,28E-09 | 0,636540955 | 0,642 | 0,31  | 2,04E-05    | MAC | Atp6v1b2      |
| Acoc3         | 1,32E-09 | 0,447666567 | 0,432 | 0,124 | 2,10E-05    | MAC | Acoc3         |
| Grb2          | 1,41E-09 | 0,41818104  | 0,679 | 0,339 | 2,24E-05    | MAC | Grb2          |
| Rab43         | 1,43E-09 | 0,444088343 | 0,531 | 0,207 | 2,26E-05    | MAC | Rab43         |
| Lpin2         | 1,53E-09 | 0,378320467 | 0,333 | 0,07  | 2,43E-05    | MAC | Lpin2         |
| Pligrk        | 1,56E-09 | 0,368980329 | 0,556 | 0,211 | 2,47E-05    | MAC | Pligrk        |
| Plekhm2       | 1,59E-09 | 0,410650711 | 0,296 | 0,054 | 2,51E-05    | MAC | Plekhm2       |
| Plin2         | 1,59E-09 | 0,542380816 | 0,691 | 0,31  | 2,53E-05    | MAC | Plin2         |
| Mem104        | 1,75E-09 | 0,421002829 | 0,42  | 0,12  | 2,77E-05    | MAC | Mem104        |
| Snx2          | 1,76E-09 | 0,596221547 | 0,827 | 0,483 | 2,79E-05    | MAC | Snx2          |
| Rilp2         | 1,78E-09 | 0,530644209 | 0,444 | 0,145 | 2,82E-05    | MAC | Rilp2         |
| Naip2         | 1,89E-09 | 0,308571636 | 0,407 | 0,107 | 3,00E-05    | MAC | Naip2         |
| Map3k8        | 2,12E-09 | 0,32260867  | 0,469 | 0,153 | 3,37E-05    | MAC | Map3k8        |
| Gm28437       | 2,31E-09 | 0,300053937 | 1     | 0,992 | 3,66E-05    | MAC | Gm28437       |
| Bmp2k         | 2,51E-09 | 0,376162685 | 0,988 | 0,86  | 3,99E-05    | MAC | Bmp2k         |
| Taok3         | 2,70E-09 | 0,356951209 | 0,457 | 0,149 | 4,28E-05    | MAC | Taok3         |
| Igfsf8        | 2,87E-09 | 0,462153522 | 0,358 | 0,095 | 4,55E-05    | MAC | Igfsf8        |
| 5031439G07Rik | 2,93E-09 | 0,332936568 | 0,506 | 0,178 | 4,64E-05    | MAC | 5031439G07Rik |
| Pqlc3         | 2,95E-09 | 0,351605941 | 0,296 | 0,058 | 4,68E-05    | MAC | Pqlc3         |
| Snx1          | 3,05E-09 | 0,556844509 | 0,704 | 0,368 | 4,83E-05    | MAC | Snx1          |
| Morc3         | 3,05E-09 | 0,385446898 | 0,481 | 0,157 | 4,84E-05    | MAC | Morc3         |
| Nfkbid        | 3,23E-09 | 0,54807823  | 0,333 | 0,074 | 5,12E-05    | MAC | Nfkbid        |
| Mem176b       | 3,96E-09 | 0,603594458 | 0,914 | 0,715 | 6,28E-05    | MAC | Mem176b       |
| Letmd1        | 4,13E-09 | 0,301215122 | 0,296 | 0,054 | 6,55E-05    | MAC | Letmd1        |
| Mem219        | 4,71E-09 | 0,352341913 | 0,506 | 0,178 | 7,46E-05    | MAC | Mem219        |
| Mfsd1         | 4,75E-09 | 0,562724908 | 0,815 | 0,508 | 7,54E-05    | MAC | Mfsd1         |
| Mem268        | 4,91E-09 | 0,360747318 | 0,272 | 0,045 | 7,78E-05    | MAC | Mem268        |
| Btg2          | 5,44E-09 | 0,763811883 | 0,716 | 0,438 | 8,62E-05    | MAC | Btg2          |
| Rps8          | 6,31E-09 | 0,414751109 | 1     | 0,975 | 0,000100056 | MAC | Rps8          |
| Man2a2        | 7,43E-09 | 0,305383657 | 0,321 | 0,07  | 0,000117767 | MAC | Man2a2        |
| Vps18         | 7,89E-09 | 0,482439892 | 0,358 | 0,099 | 0,000125044 | MAC | Vps18         |
| Rpl32         | 7,94E-09 | 0,289426801 | 1     | 0,988 | 0,00012583  | MAC | Rpl32         |
| Ap1g2         | 8,39E-09 | 0,535053461 | 0,259 | 0,045 | 0,000132948 | MAC | Ap1g2         |
| Arpc4         | 9,24E-09 | 0,379032921 | 1     | 0,884 | 0,000146448 | MAC | Arpc4         |
| Crif3         | 1,03E-08 | 0,410666623 | 0,407 | 0,116 | 0,000163151 | MAC | Crif3         |
| Arf6          | 1,07E-08 | 0,471831406 | 0,753 | 0,442 | 0,000169072 | MAC | Arf6          |
| Nupr1         | 1,10E-08 | 0,261345505 | 0,272 | 0,05  | 0,000171404 | MAC | Nupr1         |
| Aup1          | 1,23E-08 | 0,541470424 | 0,79  | 0,525 | 0,000194308 | MAC | Aup1          |
| Tsc22d4       | 1,27E-08 | 0,362072565 | 0,716 | 0,397 | 0,000201491 | MAC | Tsc22d4       |
| Mapkapk2      | 1,58E-08 | 0,31206058  | 0,642 | 0,281 | 0,000250506 | MAC | Mapkapk2      |
| Phf11a        | 1,59E-08 | 0,261339435 | 0,259 | 0,045 | 0,000251722 | MAC | Phf11a        |
| Pip4k2a       | 1,65E-08 | 0,358965477 | 0,432 | 0,14  | 0,000261708 | MAC | Pip4k2a       |
| Aftph         | 2,43E-08 | 0,280698347 | 0,383 | 0,107 | 0,000384763 | MAC | Aftph         |
| Rsrp1         | 2,47E-08 | 0,595035526 | 0,926 | 0,719 | 0,000391913 | MAC | Rsrp1         |
| Ppk1          | 2,68E-08 | 0,266462141 | 0,333 | 0,079 | 0,000425143 | MAC | Ppk1          |
| Ppp1r15a      | 3,46E-08 | 0,574772393 | 0,654 | 0,318 | 0,000548282 | MAC | Ppp1r15a      |
| Galc          | 3,47E-08 | 0,255656691 | 0,346 | 0,095 | 0,000549302 | MAC | Galc          |
| Fuca2         | 3,69E-08 | 0,434636214 | 0,506 | 0,194 | 0,000584657 | MAC | Fuca2         |
| Mthfs         | 4,48E-08 | 0,259588896 | 0,469 | 0,169 | 0,000710056 | MAC | Mthfs         |
| Serp1         | 4,57E-08 | 0,512257959 | 0,864 | 0,574 | 0,000724582 | MAC | Serp1         |
| Rragc         | 4,73E-08 | 0,287752796 | 0,519 | 0,202 | 0,000750369 | MAC | Rragc         |
| Il17ra        | 4,94E-08 | 0,339720252 | 0,37  | 0,103 | 0,000782408 | MAC | Il17ra        |
| Atp6ap2       | 5,13E-08 | 0,503285279 | 0,679 | 0,355 | 0,000813986 | MAC | Atp6ap2       |
| Cd274         | 5,17E-08 | 0,373104432 | 0,284 | 0,062 | 0,000819388 | MAC | Cd274         |
| Pdlim4        | 5,55E-08 | 0,338972994 | 0,309 | 0,074 | 0,000879132 | MAC | Pdlim4        |
| Cpne2         | 5,69E-08 | 0,331404293 | 0,593 | 0,277 | 0,000901295 | MAC | Cpne2         |
| Sfi1          | 5,70E-08 | 0,288851182 | 0,494 | 0,198 | 0,000903212 | MAC | Sfi1          |
| Dna2          | 5,92E-08 | 0,254922514 | 0,272 | 0,054 | 0,000938223 | MAC | Dna2          |
| Acs11         | 6,01E-08 | 0,37854247  | 0,321 | 0,083 | 0,00095261  | MAC | Acs11         |

|          |          |             |       |       |          |   |          |
|----------|----------|-------------|-------|-------|----------|---|----------|
| Stk17b   | 7,55E-28 | 0,953648699 | 0,63  | 0,07  | 1,20E-23 | 1 | Stk17b   |
| Gmfg     | 7,74E-28 | 0,786944147 | 0,889 | 0,264 | 1,23E-23 | 1 | Gmfg     |
| B4galnt1 | 1,45E-27 | 0,745542904 | 0,481 | 0,102 | 2,30E-23 | 1 | B4galnt1 |
| Il6ra    | 1,51E-27 | 0,578527358 | 0,494 | 0,107 | 2,40E-23 | 1 | Il6ra    |
| Glipr1   | 1,56E-27 | 0,594104761 | 0,543 | 0,037 | 2,47E-23 | 1 | Glipr1   |
| Creg1    | 1,86E-27 | 0,938382843 | 0,778 | 0,161 | 2,94E-23 | 1 | Creg1    |
| Fmn11    | 2,48E-27 | 0,397439907 | 0,568 | 0,041 | 3,92E-23 | 1 | Fmn11    |
| Gm13166  | 3,24E-27 | 0,267573573 | 0,765 | 0,178 | 5,13E-23 | 1 | Gm13166  |
| Pik3ap1  | 3,93E-27 | 0,46500539  | 0,432 | 0     | 6,24E-23 | 1 | Pik3ap1  |
| Pouz2f2  | 3,93E-27 | 0,374063164 | 0,432 | 0     | 6,24E-23 | 1 | Pouz2f2  |
| Sic6a6   | 4,03E-27 | 0,792335408 | 0,877 | 0,231 | 6,39E-23 | 1 | Sic6a6   |
| M544c4   | 4,73E-27 | 0,992016276 | 0,444 | 0,004 | 7,51E-23 | 1 | M544c4   |
| AW112010 | 5,62E-27 | 1,50202659  | 0,827 | 0,236 | 8,91E-23 | 1 | AW112010 |
| H2-Ab1   | 5,67E-27 | 2,549173623 | 0,852 | 0,306 | 8,98E-23 | 1 | H2-Ab1   |
| Camk1d   | 6,91E-27 | 0,489802103 | 0,444 | 0,004 | 1,09E-22 | 1 | Camk1d   |
| Sifn2    | 7,35E-27 | 0,99484791  | 0,802 | 0,174 | 1,17E-22 | 1 | Sifn2    |
| Fnbp1    | 1,30E-26 | 0,903192124 | 0,778 | 0,174 | 2,05E-22 | 1 | Fnbp1    |
| Selenop  | 1,67E-26 | 1,277941566 | 0,988 | 0,818 |          |   |          |

|               |          |             |       |       |             |     |               |
|---------------|----------|-------------|-------|-------|-------------|-----|---------------|
| Tnfrsf1b      | 6,71E-08 | 0,304839792 | 0,617 | 0,281 | 0,001064223 | MAC | Tnfrsf1b      |
| Akr1b3        | 6,91E-08 | 0,33764873  | 0,716 | 0,364 | 0,001094718 | MAC | Akr1b3        |
| Ncoa3         | 7,04E-08 | 0,404264804 | 0,741 | 0,421 | 0,00115937  | MAC | Ncoa3         |
| Iffng1        | 7,53E-08 | 0,574604344 | 0,889 | 0,657 | 0,001194152 | MAC | Iffng1        |
| Gm42418       | 7,91E-08 | 0,324815373 | 0,753 | 0,496 | 0,001253297 | MAC | Gm42418       |
| Psmb9         | 8,54E-08 | 0,411952036 | 0,778 | 0,492 | 0,001353094 | MAC | Psmb9         |
| Parp1         | 8,68E-08 | 0,462397937 | 0,556 | 0,248 | 0,001375698 | MAC | Parp1         |
| Klf6          | 8,75E-08 | 0,559287297 | 0,827 | 0,554 | 0,00138672  | MAC | Klf6          |
| Tmem189       | 8,82E-08 | 0,460042083 | 0,531 | 0,244 | 0,001398114 | MAC | Tmem189       |
| Ndufa13       | 9,80E-08 | 0,39710895  | 0,864 | 0,707 | 0,001553524 | MAC | Ndufa13       |
| Cytl1         | 9,95E-08 | 0,385011682 | 0,568 | 0,256 | 0,001577463 | MAC | Cytl1         |
| Cdk9          | 1,03E-07 | 0,379559798 | 0,494 | 0,19  | 0,001625808 | MAC | Cdk9          |
| Rack1         | 1,04E-07 | 0,404986594 | 1     | 0,926 | 0,001650619 | MAC | Rack1         |
| Mapk14        | 1,27E-07 | 0,422128891 | 0,519 | 0,219 | 0,002005811 | MAC | Mapk14        |
| Gm7536        | 1,27E-07 | 0,341241622 | 0,988 | 0,938 | 0,002016701 | MAC | Gm7536        |
| Fln           | 1,40E-07 | 0,510609678 | 0,358 | 0,107 | 0,002213389 | MAC | Fln           |
| Rap2a         | 1,40E-07 | 0,390838553 | 0,457 | 0,169 | 0,00222496  | MAC | Rap2a         |
| Vps26a        | 1,43E-07 | 0,368504367 | 0,58  | 0,277 | 0,002262571 | MAC | Vps26a        |
| Slc25a45      | 1,52E-07 | 0,387565813 | 0,284 | 0,066 | 0,002408527 | MAC | Slc25a45      |
| Fes           | 1,74E-07 | 0,400772623 | 0,691 | 0,335 | 0,002761886 | MAC | Fes           |
| Dgkz          | 1,78E-07 | 0,511542067 | 0,741 | 0,467 | 0,002822216 | MAC | Dgkz          |
| Hspa1a        | 1,80E-07 | 1,174612449 | 0,519 | 0,269 | 0,002846349 | MAC | Hspa1a        |
| Tmem192       | 1,84E-07 | 0,479401824 | 0,407 | 0,153 | 0,002909046 | MAC | Tmem192       |
| Wdr81         | 1,87E-07 | 0,269206671 | 0,259 | 0,054 | 0,002986104 | MAC | Wdr81         |
| Dennd1a       | 2,00E-07 | 0,251730345 | 0,432 | 0,161 | 0,0031665   | MAC | Dennd1a       |
| Plekb2        | 2,06E-07 | 0,297982996 | 0,469 | 0,178 | 0,00327252  | MAC | Plekb2        |
| Z210016F16Rik | 2,19E-07 | 0,283348809 | 0,432 | 0,153 | 0,003478031 | MAC | Z210016F16Rik |
| Nceh1         | 2,29E-07 | 0,342073045 | 0,333 | 0,095 | 0,003625298 | MAC | Nceh1         |
| Gaa           | 2,29E-07 | 0,32016142  | 0,444 | 0,161 | 0,003626059 | MAC | Gaa           |
| Adam9         | 2,35E-07 | 0,360520503 | 0,79  | 0,467 | 0,003719169 | MAC | Adam9         |
| Rpl37a        | 2,46E-07 | 0,253571596 | 1     | 0,996 | 0,003897212 | MAC | Rpl37a        |
| Myo9b         | 2,53E-07 | 0,399475533 | 0,58  | 0,285 | 0,004006585 | MAC | Myo9b         |
| Mdfic         | 2,71E-07 | 0,363253621 | 0,506 | 0,219 | 0,004294311 | MAC | Mdfic         |
| Slc35c2       | 2,72E-07 | 0,33979996  | 0,432 | 0,165 | 0,004313519 | MAC | Slc35c2       |
| Rps13         | 2,80E-07 | 0,34570896  | 0,963 | 0,913 | 0,004438004 | MAC | Rps13         |
| Gm10275       | 2,81E-07 | 0,321386147 | 0,988 | 0,888 | 0,004455872 | MAC | Gm10275       |
| Tnfrsf21      | 2,84E-07 | 0,315534155 | 0,284 | 0,066 | 0,004505844 | MAC | Tnfrsf21      |
| Rps26         | 2,95E-07 | 0,256091399 | 1     | 0,992 | 0,004679862 | MAC | Rps26         |
| Rgs19         | 3,32E-07 | 0,343106929 | 0,568 | 0,269 | 0,00525813  | MAC | Rgs19         |
| Camk1         | 3,47E-07 | 0,562994961 | 0,716 | 0,417 | 0,005507566 | MAC | Camk1         |
| Akr1a1        | 3,52E-07 | 0,40842193  | 0,951 | 0,913 | 0,005578477 | MAC | Akr1a1        |
| Nptn          | 3,60E-07 | 0,474010964 | 0,716 | 0,475 | 0,005704295 | MAC | Nptn          |
| Dpp7          | 3,78E-07 | 0,264869139 | 0,284 | 0,07  | 0,005995632 | MAC | Dpp7          |
| Tpp1          | 4,17E-07 | 0,450689817 | 0,79  | 0,517 | 0,006611116 | MAC | Tpp1          |
| Dleu2         | 4,20E-07 | 0,322452128 | 0,605 | 0,306 | 0,006653505 | MAC | Dleu2         |
| Pigs          | 4,45E-07 | 0,456908012 | 0,519 | 0,227 | 0,007060433 | MAC | Pigs          |
| Cdt1          | 4,85E-07 | 0,251512871 | 0,346 | 0,103 | 0,007682716 | MAC | Cdt1          |
| Taf6l         | 4,86E-07 | 0,363202758 | 0,593 | 0,293 | 0,007709968 | MAC | Taf6l         |
| Cox14         | 5,11E-07 | 0,342245265 | 0,691 | 0,45  | 0,008108268 | MAC | Cox14         |
| Blvra         | 5,15E-07 | 0,309984188 | 0,704 | 0,376 | 0,008163604 | MAC | Blvra         |
| Gsto1         | 5,27E-07 | 0,388805125 | 0,728 | 0,446 | 0,008359742 | MAC | Gsto1         |
| Ssh2          | 5,30E-07 | 0,566563372 | 0,753 | 0,492 | 0,008408263 | MAC | Ssh2          |
| Stat6         | 5,37E-07 | 0,46673398  | 0,543 | 0,244 | 0,008511975 | MAC | Stat6         |
| Crip1         | 5,43E-07 | 0,577245067 | 0,765 | 0,554 | 0,008613079 | MAC | Crip1         |
| Btg1          | 5,49E-07 | 0,45796331  | 0,938 | 0,789 | 0,008706478 | MAC | Btg1          |
| Scand1        | 5,67E-07 | 0,281490816 | 0,741 | 0,521 | 0,008985107 | MAC | Scand1        |
| Vrk2          | 6,35E-07 | 0,279880631 | 0,259 | 0,062 | 0,001059752 | MAC | Vrk2          |
| Npc1          | 7,38E-07 | 0,275982499 | 0,395 | 0,14  | 0,01169185  | MAC | Npc1          |
| Atpv6v1a      | 8,23E-07 | 0,420850531 | 0,691 | 0,388 | 0,013040315 | MAC | Atpv6v1a      |
| Rpl21         | 9,14E-07 | 0,302270835 | 1     | 0,963 | 0,014486009 | MAC | Rpl21         |
| Gm26917       | 9,87E-07 | 0,334005648 | 0,988 | 0,855 | 0,015653415 | MAC | Gm26917       |
| Htatip2       | 1,00E-06 | 0,316806292 | 0,407 | 0,149 | 0,015872115 | MAC | Htatip2       |
| Pmepa1        | 1,03E-06 | 0,375002635 | 0,79  | 0,521 | 0,016399906 | MAC | Pmepa1        |
| Cnp           | 1,04E-06 | 0,291586412 | 0,407 | 0,145 | 0,016449048 | MAC | Cnp           |
| mt-Atp6       | 1,10E-06 | 0,306721723 | 1     | 0,983 | 0,017496445 | MAC | mt-Atp6       |
| G6pdx         | 1,14E-06 | 0,423892542 | 0,395 | 0,149 | 0,018137153 | MAC | G6pdx         |
| Atp5e         | 1,20E-06 | 0,314681132 | 0,975 | 0,864 | 0,018985818 | MAC | Atp5e         |
| AC121965.1    | 1,26E-06 | 0,29458315  | 0,901 | 0,764 | 0,020048374 | MAC | AC121965.1    |
| Cox8a         | 1,38E-06 | 0,332429412 | 0,951 | 0,888 | 0,021691192 | MAC | Cox8a         |
| Cap1          | 1,39E-06 | 0,335142778 | 0,938 | 0,76  | 0,021984693 | MAC | Cap1          |
| Tex10         | 1,46E-06 | 0,309308564 | 0,432 | 0,178 | 0,023171982 | MAC | Tex10         |
| Edem1         | 1,59E-06 | 0,306618845 | 0,654 | 0,355 | 0,025200255 | MAC | Edem1         |
| Actb          | 1,60E-06 | 0,275931915 | 1     | 1     | 0,025410614 | MAC | Actb          |
| Per1          | 1,67E-06 | 0,274415015 | 0,617 | 0,331 | 0,026488303 | MAC | Per1          |
| Slc36a1       | 1,74E-06 | 0,320110234 | 0,259 | 0,066 | 0,027607457 | MAC | Slc36a1       |
| Gnpda1        | 1,75E-06 | 0,525451447 | 0,383 | 0,149 | 0,027700075 | MAC | Gnpda1        |
| Z810474019Rik | 1,83E-06 | 0,340457258 | 0,679 | 0,399 | 0,028980775 | MAC | Z810474019Rik |
| Txnip         | 1,88E-06 | 0,250458743 | 0,741 | 0,409 | 0,029872936 | MAC | Txnip         |
| Gba           | 1,90E-06 | 0,421069872 | 0,593 | 0,302 | 0,030151438 | MAC | Gba           |
| Dtnbp1        | 1,99E-06 | 0,264801413 | 0,358 | 0,124 | 0,031552819 | MAC | Dtnbp1        |
| Naglu         | 2,11E-06 | 0,336616854 | 0,395 | 0,153 | 0,03342043  | MAC | Naglu         |
| Cox6b1        | 2,28E-06 | 0,31456173  | 0,988 | 0,926 | 0,036129408 | MAC | Cox6b1        |
| Prex1         | 2,29E-06 | 0,477377259 | 0,679 | 0,409 | 0,036277186 | MAC | Prex1         |
| Fam50a        | 2,29E-06 | 0,271526568 | 0,37  | 0,136 | 0,036346359 | MAC | Fam50a        |
| Hn1           | 2,33E-06 | 0,448412304 | 0,827 | 0,55  | 0,036906254 | MAC | Hn1           |
| Tgif1         | 2,42E-06 | 0,377933745 | 0,605 | 0,302 | 0,038291948 | MAC | Tgif1         |
| Gapdh         | 2,46E-06 | 0,278842381 | 1     | 0,988 | 0,039008427 | MAC | Gapdh         |
| M6pr          | 2,50E-06 | 0,432072169 | 0,84  | 0,558 | 0,039681663 | MAC | M6pr          |
| Anxa4         | 2,56E-06 | 0,331962501 | 0,593 | 0,31  | 0,040586703 | MAC | Anxa4         |
| Mrps36        | 2,58E-06 | 0,268668285 | 0,506 | 0,273 | 0,040968991 | MAC | Mrps36        |
| Rnf19b        | 2,59E-06 | 0,340871007 | 0,395 | 0,153 | 0,041126594 | MAC | Rnf19b        |
| Atp6ap1       | 2,62E-06 | 0,355720406 | 0,827 | 0,512 | 0,041529857 | MAC | Atp6ap1       |
| Tmem176a      | 2,67E-06 | 0,525873627 | 0,778 | 0,607 | 0,042316403 | MAC | Tmem176a      |
| Rcbtb2        | 2,70E-06 | 0,374847106 | 0,506 | 0,236 | 0,042797029 | MAC | Rcbtb2        |
| Bcl2l1        | 2,88E-06 | 0,50225105  | 0,58  | 0,322 | 0,045626493 | MAC | Bcl2l1        |
| Trafd1        | 3,02E-06 | 0,514206768 | 0,605 | 0,331 | 0,047899631 | MAC | Trafd1        |
| Nhlrc3        | 3,26E-06 | 0,349961382 | 0,432 | 0,182 | 0,051735818 | MAC | Nhlrc3        |
| Wipf1         | 3,68E-06 | 0,36239454  | 0,556 | 0,322 | 0,058838708 | MAC | Wipf1         |
| Cnpy3         | 4,09E-06 | 0,382239611 | 0,543 | 0,273 | 0,064770194 | MAC | Cnpy3         |
| Elf4          | 4,16E-06 | 0,25896207  | 0,346 | 0,12  | 0,06601765  | MAC | Elf4          |
| Actr2         | 4,63E-06 | 0,25243645  | 1     | 0,938 | 0,073358429 | MAC | Actr2         |
| Rps27a        | 4,72E-06 | 0,266554083 | 1     | 0,975 | 0,074895431 | MAC | Rps27a        |
| Csf2rb        | 4,83E-06 | 0,414080554 | 0,593 | 0,322 | 0,076625401 | MAC | Csf2rb        |
| Ddt           | 4,91E-06 | 0,255558656 | 0,407 | 0,169 | 0,077902543 | MAC | Ddt           |
| Rnh1          | 5,07E-06 | 0,37633876  | 0,815 | 0,496 | 0,080439727 | MAC | Rnh1          |
| Zfp622        | 5,08E-06 | 0,276062419 | 0,407 | 0,161 | 0,080573376 | MAC | Zfp622        |
| Tor1a         | 5,15E-06 | 0,377415083 | 0,531 | 0,285 | 0,081602432 | MAC | Tor1a         |
| Smpd3a        | 5,91E-06 | 0,27364814  | 0,457 | 0,186 | 0,093753494 | MAC | Smpd3a        |
| Pacsin2       | 6,49E-06 | 0,301107499 | 0,642 | 0,335 | 0,102865868 | MAC | Pacsin2       |
| Cybsr4        | 6,78E-06 | 0,31605335  | 0,457 | 0,202 | 0,107544474 | MAC | Cybsr4        |
| Ubl3          | 6,98E-06 | 0,42328339  | 0,778 | 0,525 | 0,110574542 | MAC | Ubl3          |
| Tmem55b       | 7,18E-06 | 0,369626709 | 0,457 | 0,223 | 0,113858887 | MAC | Tmem55b       |
| Pip5k1c       | 8,09E-06 | 0,449937828 | 0,593 | 0,36  | 0,128269372 | MAC | Pip5k1c       |
| Lifr          | 8,29E-06 | 0,374037249 | 0,321 | 0,116 | 0,131471297 | MAC | Lifr          |
| Mfsd11        | 8,59E-06 | 0,310880442 | 0,333 | 0,12  | 0,136236867 | MAC | Mfsd11        |
| Irak4         | 8,73E-06 | 0,261272298 | 0,358 | 0,14  | 0,138343019 | MAC | Irak4         |
| Ccdc115       | 8,80E-06 | 0,328658939 | 0,481 | 0,231 | 0,139516881 | MAC | Ccdc115       |
| Glxr          | 8,93E-06 | 0,394557061 | 0,617 | 0,335 | 0,141488708 | MAC | Glxr          |
| Ddx28         | 9,28E-06 | 0,337459919 | 0,259 | 0,079 | 0,147046663 | MAC | Ddx28         |
| Ndufa2        | 9,67E-06 | 0,348987899 | 0,951 | 0,868 | 0,153322264 | MAC | Ndufa2        |

|         |          |             |       |       |          |   |         |
|---------|----------|-------------|-------|-------|----------|---|---------|
| Ppt1    | 1,50E-19 | 0,966749552 | 0,914 | 0,421 | 2,37E-15 | 1 | Ppt1    |
| Pik3cg  | 1,52E-19 | 0,48954774  | 0,481 | 0,254 | 2,41E-15 | 1 | Pik3cg  |
| Soat1   | 1,76E-19 | 0,468381438 | 0,778 | 0,515 | 2,79E-15 | 1 | Soat1   |
| Neur1   | 1,85E-19 | 0,672542852 | 0,593 | 0,107 | 2,93E-15 | 1 | Neur1   |
| Cnnd2   | 2,14E-19 | 0,591870319 | 0,432 | 0,037 | 3,40E-15 | 1 | Cnnd2   |
| Slc37a2 | 2,75E-19 | 0,455059437 | 0,383 | 0,021 | 4,36E-15 | 1 | Slc37a2 |
| Rasal3  | 2,90E-19 | 0,529944769 | 0,309 | 0     | 4,59E-15 | 1 | Rasal3  |
| Tlr8    | 2,90E-19 | 0,49041397  | 0,309 | 0     | 4,59E-15 | 1 | Tlr8    |
| Btk     | 2,90E-19 | 0,398201553 | 0,309 | 0     | 4,59E-15 | 1 | Btk     |
| Gm26740 | 2,90E-19 | 0,346443608 | 0,309 | 0     | 4,59E-15 | 1 | Gm26740 |
| Dcxr    | 2,92E-19 | 0,427762424 | 0,457 | 0,045 | 4,63E-15 | 1 | Dcxr    |
| Smim3   | 3,36E-19 | 0,622848311 | 0,457 | 0,045 | 5,33E-15 | 1 | Smim3   |
| Irs2    | 4,52E-19 | 0,304990634 | 0,321 | 0,004 | 7,17E-15 | 1 | Irs2    |
| Lyl1    | 4,89E-19 | 0,696506323 | 0,506 | 0,079 | 7,75E-15 | 1 | Lyl1    |
| Lacc1   | 5,98E-19 | 0,517177254 | 0,395 | 0,029 | 9,       |   |         |

|               |             |             |       |       |             |     |               |
|---------------|-------------|-------------|-------|-------|-------------|-----|---------------|
| Ncapp2        | 9,76E-06    | 0,415761684 | 0,346 | 0,136 | 0,15469208  | MAC | Ncapp2        |
| Kxd1          | 9,89E-06    | 0,287555683 | 0,494 | 0,236 | 0,156810509 | MAC | Kxd1          |
| Ms4a6d        | 9,95E-06    | 0,449845956 | 0,914 | 0,777 | 0,157661587 | MAC | Ms4a6d        |
| Psmb10        | 1,01E-05    | 0,351103358 | 0,716 | 0,463 | 0,160047223 | MAC | Psmb10        |
| Ccn1          | 1,04E-05    | 0,399996713 | 0,654 | 0,409 | 0,164085963 | MAC | Ccn1          |
| Cuta          | 1,14E-05    | 0,257625009 | 0,679 | 0,446 | 0,18070553  | MAC | Cuta          |
| Siva1         | 1,17E-05    | 0,369090619 | 0,395 | 0,169 | 0,185836272 | MAC | Siva1         |
| Arrdc1        | 1,24E-05    | 0,35977545  | 0,568 | 0,306 | 0,196907732 | MAC | Arrdc1        |
| Nfil3         | 1,32E-05    | 0,374162748 | 0,272 | 0,087 | 0,209915239 | MAC | Nfil3         |
| Adam17        | 1,39E-05    | 0,375295267 | 0,58  | 0,343 | 0,220950103 | MAC | Adam17        |
| Acer3         | 1,43E-05    | 0,432093874 | 0,481 | 0,24  | 0,226900967 | MAC | Acer3         |
| Smap2         | 1,58E-05    | 0,283444208 | 0,543 | 0,281 | 0,250145372 | MAC | Smap2         |
| BC005537      | 1,59E-05    | 0,463756994 | 0,691 | 0,442 | 0,251665269 | MAC | BC005537      |
| Rps12l1       | 1,59E-05    | 0,313469105 | 0,963 | 0,855 | 0,252374209 | MAC | Rps12l1       |
| Mif           | 1,65E-05    | 0,350488226 | 0,963 | 0,814 | 0,261009391 | MAC | Mif           |
| Bmyc          | 1,74E-05    | 0,312660213 | 0,432 | 0,207 | 0,276256042 | MAC | Bmyc          |
| Acp2          | 1,80E-05    | 0,38597389  | 0,432 | 0,194 | 0,285111216 | MAC | Acp2          |
| Pabpc1        | 1,89E-05    | 0,250776888 | 0,988 | 0,942 | 0,300015297 | MAC | Pabpc1        |
| Rhbdf2        | 2,17E-05    | 0,36100564  | 0,296 | 0,107 | 0,344556075 | MAC | Rhbdf2        |
| Heat5a        | 2,27E-05    | 0,404769656 | 0,37  | 0,161 | 0,359961722 | MAC | Heat5a        |
| Rnf13         | 2,45E-05    | 0,315453115 | 0,654 | 0,368 | 0,388255311 | MAC | Rnf13         |
| Tmem14c       | 2,46E-05    | 0,311756394 | 0,765 | 0,537 | 0,390646008 | MAC | Tmem14c       |
| Wdr26         | 2,56E-05    | 0,353666909 | 0,691 | 0,438 | 0,405755681 | MAC | Wdr26         |
| Mon2          | 2,74E-05    | 0,256787941 | 0,333 | 0,128 | 0,435091688 | MAC | Mon2          |
| Ifi211        | 3,16E-05    | 0,555267337 | 0,358 | 0,157 | 0,500438229 | MAC | Ifi211        |
| Spg21         | 3,16E-05    | 0,253956438 | 0,63  | 0,347 | 0,501644669 | MAC | Spg21         |
| Got1          | 3,17E-05    | 0,315694764 | 0,333 | 0,128 | 0,502705264 | MAC | Got1          |
| Fkbp5         | 3,30E-05    | 0,326733948 | 0,704 | 0,488 | 0,522835258 | MAC | Fkbp5         |
| Rpl17         | 3,31E-05    | 0,284752912 | 0,988 | 0,905 | 0,525460259 | MAC | Rpl17         |
| Tab2          | 3,32E-05    | 0,297073291 | 0,494 | 0,26  | 0,526972407 | MAC | Tab2          |
| Rbfa          | 3,38E-05    | 0,293478347 | 0,42  | 0,19  | 0,536569295 | MAC | Rbfa          |
| Acaa1a        | 4,03E-05    | 0,288458877 | 0,543 | 0,289 | 0,638575488 | MAC | Acaa1a        |
| Rab8b         | 4,27E-05    | 0,353639868 | 0,617 | 0,38  | 0,677268308 | MAC | Rab8b         |
| Zmiz2         | 4,58E-05    | 0,373698644 | 0,481 | 0,264 | 0,726072889 | MAC | Zmiz2         |
| Il10rb        | 4,78E-05    | 0,392888027 | 0,667 | 0,426 | 0,757823196 | MAC | Il10rb        |
| Stk24         | 4,80E-05    | 0,323531773 | 0,37  | 0,169 | 0,761298812 | MAC | Stk24         |
| Mcl1          | 4,82E-05    | 0,321860004 | 0,84  | 0,653 | 0,763520793 | MAC | Mcl1          |
| Haus8         | 4,93E-05    | 0,280554427 | 0,272 | 0,099 | 0,780957369 | MAC | Haus8         |
| Gna13         | 4,97E-05    | 0,347415731 | 0,691 | 0,467 | 0,787658785 | MAC | Gna13         |
| Rpl7a         | 5,03E-05    | 0,271818892 | 1     | 0,955 | 0,796827427 | MAC | Rpl7a         |
| Srsf9         | 5,06E-05    | 0,278987998 | 0,605 | 0,397 | 0,801722727 | MAC | Srsf9         |
| Tbcd14        | 5,53E-05    | 0,292106893 | 0,407 | 0,19  | 0,876494101 | MAC | Tbcd14        |
| Calr          | 5,71E-05    | 0,276697    | 0,963 | 0,872 | 0,905681229 | MAC | Calr          |
| Psme1         | 5,76E-05    | 0,35124452  | 0,852 | 0,707 | 0,912454285 | MAC | Psme1         |
| Lamp2         | 5,91E-05    | 0,362412043 | 0,901 | 0,707 | 0,936613516 | MAC | Lamp2         |
| Neu1          | 6,10E-05    | 0,407221473 | 0,457 | 0,244 | 0,96739424  | MAC | Neu1          |
| Atp2b1        | 6,12E-05    | 0,253957571 | 0,84  | 0,533 | 0,97041529  | MAC | Atp2b1        |
| Cdc42se1      | 6,27E-05    | 0,374070549 | 0,741 | 0,554 | 0,993821394 | MAC | Cdc42se1      |
| Cox5a         | 6,81E-05    | 0,329080342 | 0,914 | 0,752 | 1           | MAC | Cox5a         |
| Naga          | 6,85E-05    | 0,327309289 | 0,556 | 0,314 | 1           | MAC | Naga          |
| Lamtor1       | 6,90E-05    | 0,309293295 | 0,728 | 0,504 | 1           | MAC | Lamtor1       |
| Rpsa          | 7,55E-05    | 0,259320969 | 1     | 0,934 | 1           | MAC | Rpsa          |
| Fam174a       | 7,74E-05    | 0,335653986 | 0,531 | 0,306 | 1           | MAC | Fam174a       |
| Rasa3         | 7,81E-05    | 0,281353895 | 0,383 | 0,174 | 1           | MAC | Rasa3         |
| Tln1          | 7,98E-05    | 0,297268989 | 0,926 | 0,831 | 1           | MAC | Tln1          |
| Gab2          | 9,01E-05    | 0,349502881 | 0,494 | 0,277 | 1           | MAC | Gab2          |
| Gna12         | 9,38E-05    | 0,418271329 | 0,691 | 0,471 | 1           | MAC | Gna12         |
| Tkt           | 0,00010402  | 0,254276801 | 0,765 | 0,537 | 1           | MAC | Tkt           |
| Pnrc1         | 0,00010131  | 0,337376004 | 0,58  | 0,372 | 1           | MAC | Pnrc1         |
| Pgam1         | 0,000121458 | 0,481171014 | 0,877 | 0,674 | 1           | MAC | Pgam1         |
| Agps          | 0,000134888 | 0,252685423 | 0,469 | 0,24  | 1           | MAC | Agps          |
| Slc48a1       | 0,000135331 | 0,263373231 | 0,42  | 0,207 | 1           | MAC | Slc48a1       |
| Scamp2        | 0,000140012 | 0,272735841 | 0,691 | 0,455 | 1           | MAC | Scamp2        |
| Fam234a       | 0,0001411   | 0,280142013 | 0,358 | 0,161 | 1           | MAC | Fam234a       |
| Ski           | 0,000141441 | 0,331579784 | 0,654 | 0,45  | 1           | MAC | Ski           |
| Xylt2         | 0,000143447 | 0,257927367 | 0,272 | 0,107 | 1           | MAC | Xylt2         |
| Psme2         | 0,000143635 | 0,275848433 | 0,889 | 0,764 | 1           | MAC | Psme2         |
| Ap2a2         | 0,000147513 | 0,304147864 | 0,728 | 0,554 | 1           | MAC | Ap2a2         |
| Oaz1          | 0,000154596 | 0,264464644 | 1     | 0,959 | 1           | MAC | Oaz1          |
| Herc4         | 0,000154734 | 0,359136314 | 0,358 | 0,174 | 1           | MAC | Herc4         |
| Vdac2         | 0,000160588 | 0,303634252 | 0,877 | 0,649 | 1           | MAC | Vdac2         |
| Frm4b         | 0,00016283  | 0,475232633 | 0,531 | 0,331 | 1           | MAC | Frm4b         |
| Ahsa1         | 0,000173995 | 0,355986811 | 0,543 | 0,331 | 1           | MAC | Ahsa1         |
| Hfp1          | 0,000174231 | 0,275094629 | 0,481 | 0,277 | 1           | MAC | Hfp1          |
| Fkbp15        | 0,000187463 | 0,283872936 | 0,531 | 0,31  | 1           | MAC | Fkbp15        |
| Pmvk          | 0,000200092 | 0,287175187 | 0,432 | 0,219 | 1           | MAC | Pmvk          |
| Narf1         | 0,000215593 | 0,272199991 | 0,259 | 0,099 | 1           | MAC | Narf1         |
| Rpl36al       | 0,000217303 | 0,291709092 | 0,938 | 0,798 | 1           | MAC | Rpl36al       |
| Capza2        | 0,000217745 | 0,255354865 | 0,951 | 0,818 | 1           | MAC | Capza2        |
| Tob2          | 0,000231997 | 0,271365236 | 0,37  | 0,194 | 1           | MAC | Tob2          |
| Mdh1          | 0,000238528 | 0,282455577 | 0,654 | 0,434 | 1           | MAC | Mdh1          |
| Ubc           | 0,000245708 | 0,302117554 | 1     | 0,971 | 1           | MAC | Ubc           |
| Ccdc86        | 0,000248756 | 0,299585161 | 0,333 | 0,149 | 1           | MAC | Ccdc86        |
| mt-Nd5        | 0,000254438 | 0,258544722 | 0,988 | 0,979 | 1           | MAC | mt-Nd5        |
| Sptssa        | 0,000280441 | 0,314468222 | 0,691 | 0,521 | 1           | MAC | Sptssa        |
| Sec11c        | 0,000281978 | 0,343426263 | 0,679 | 0,496 | 1           | MAC | Sec11c        |
| Colgal1       | 0,000285128 | 0,444913719 | 0,605 | 0,442 | 1           | MAC | Colgal1       |
| Atp6v0e       | 0,000294512 | 0,277202448 | 0,864 | 0,665 | 1           | MAC | Atp6v0e       |
| Jun           | 0,000296263 | 0,439974447 | 0,654 | 0,459 | 1           | MAC | Jun           |
| Syng2         | 0,000328371 | 0,358140639 | 0,815 | 0,599 | 1           | MAC | Syng2         |
| Incepn        | 0,000388183 | 0,312358927 | 0,284 | 0,128 | 1           | MAC | Incepn        |
| Tpt1          | 0,000393596 | 0,256808045 | 1     | 0,983 | 1           | MAC | Tpt1          |
| Gstp1         | 0,000410133 | 0,283807883 | 0,63  | 0,475 | 1           | MAC | Gstp1         |
| lms1abp       | 0,000421008 | 0,339652005 | 0,827 | 0,616 | 1           | MAC | lms1abp       |
| Lrpa1         | 0,000434266 | 0,294307354 | 0,605 | 0,384 | 1           | MAC | Lrpa1         |
| Map3k1        | 0,000443908 | 0,327620612 | 0,617 | 0,455 | 1           | MAC | Map3k1        |
| Man1c1        | 0,000459086 | 0,28352606  | 0,432 | 0,252 | 1           | MAC | Man1c1        |
| Cept1         | 0,000579451 | 0,257571054 | 0,42  | 0,231 | 1           | MAC | Cept1         |
| Plib2         | 0,000580448 | 0,292592948 | 0,519 | 0,314 | 1           | MAC | Plib2         |
| Ctc           | 0,000586272 | 0,326264032 | 0,938 | 0,851 | 1           | MAC | Ctc           |
| mt-Nd2        | 0,000606054 | 0,27418639  | 0,975 | 0,979 | 1           | MAC | mt-Nd2        |
| Tnfrfp3       | 0,000608246 | 0,51500519  | 0,259 | 0,116 | 1           | MAC | Tnfrfp3       |
| Rpl10         | 0,000622519 | 0,272833737 | 0,988 | 0,93  | 1           | MAC | Rpl10         |
| 2310035C23Rik | 0,000688    | 0,275192349 | 0,469 | 0,289 | 1           | MAC | 2310035C23Rik |
| Tm6s1f        | 0,000732851 | 0,319738078 | 0,432 | 0,236 | 1           | MAC | Tm6s1f        |
| Mrs26         | 0,000805056 | 0,253855037 | 0,481 | 0,293 | 1           | MAC | Mrs26         |
| Tsc22d3       | 0,001002564 | 0,269443601 | 0,741 | 0,55  | 1           | MAC | Tsc22d3       |
| Rfc2          | 0,001011926 | 0,295254248 | 0,556 | 0,368 | 1           | MAC | Rfc2          |
| Dram2         | 0,001028189 | 0,279026799 | 0,716 | 0,558 | 1           | MAC | Dram2         |
| Tp1           | 0,001106805 | 0,291732728 | 0,926 | 0,711 | 1           | MAC | Tp1           |
| Echs1         | 0,001114899 | 0,355575642 | 0,481 | 0,322 | 1           | MAC | Echs1         |
| Arhgap25      | 0,001207998 | 0,317985339 | 0,568 | 0,368 | 1           | MAC | Arhgap25      |
| Zfyve19       | 0,001300237 | 0,327754084 | 0,272 | 0,132 | 1           | MAC | Zfyve19       |
| Ensa          | 0,00130699  | 0,3004799   | 0,605 | 0,409 | 1           | MAC | Ensa          |
| Cdca3         | 0,001342141 | 0,41526518  | 0,259 | 0,12  | 1           | MAC | Cdca3         |
| Mif4gd        | 0,001384247 | 0,258736045 | 0,395 | 0,219 | 1           | MAC | Mif4gd        |
| Gpr137b-ps    | 0,001428522 | 0,265826649 | 0,432 | 0,26  | 1           | MAC | Gpr137b-ps    |
| Dnm2          | 0,001570228 | 0,256464864 | 0,741 | 0,579 | 1           | MAC | Dnm2          |
| Marcks        | 0,001595358 | 0,270161179 | 1     | 0,959 | 1           | MAC | Marcks        |
| Atp6v1c1      | 0,00165266  | 0,302802144 | 0,506 | 0,331 | 1           | MAC | Atp6v1c1      |

|          |          |             |       |       |          |   |          |
|----------|----------|-------------|-------|-------|----------|---|----------|
| Fam46a   | 9,34E-15 | 0,452056672 | 0,346 | 0,033 | 1,48E-10 | 1 | Fam46a   |
| Mt2      | 1,00E-14 | 0,32885324  | 0,432 | 0,066 | 1,58E-10 | 1 | Mt2      |
| Cd37     | 1,22E-14 | 0,256594967 | 0,284 | 0,102 | 1,94E-10 | 1 | Cd37     |
| Rps9     | 1,26E-14 | 0,463912496 | 1     | 0,959 | 2,00E-10 | 1 | Rps9     |
| Sh3bgr13 | 1,33E-14 | 0,511549595 | 0,988 | 0,955 | 2,10E-10 | 1 | Sh3bgr13 |
| Rplp2    | 1,59E-14 | 0,43557302  | 1     | 0,971 | 2,51E-10 | 1 | Rplp2    |
| Plk3     | 1,72E-14 | 0,732739522 | 0,481 | 0,103 | 2,73E-10 | 1 | Plk3     |
| Hebp1    | 1,89E-14 | 0,510041106 | 0,679 | 0,236 | 2,99E-10 | 1 | Hebp1    |
| Arpc2    | 2,18E-14 | 0,538401095 | 1     | 0,934 | 3,45E-10 | 1 | Arpc2    |
| Cfb      | 2,25E-14 | 0,91965093  | 0,63  | 0,186 | 3,56E-10 | 1 | Cfb      |
| Lamtor4  | 2,60E-14 | 0,436108288 | 0,741 | 0,31  | 4,12E-10 | 1 | Lamtor4  |
| Adamts14 | 2,73E-14 | 0,494964011 | 0,284 | 0,107 | 4,33E-10 | 1 | Adamts14 |
| Nmt1     | 3,00E-14 | 0,511115036 | 0,938 | 0,595 | 4,75E-10 | 1 | Nmt1     |
| Grna     | 3,37E-14 | 0,765950615 | 0,79  | 0,372 | 5,34E-10 | 1 | Grna     |
| Rbjp     | 3,43E-14 | 0,578363677 | 0,704 | 0,264 | 5,43E-10 | 1 | Rbjp     |
| Irf8     | 4,52E-14 | 0,626553181 | 0,815 | 0,355 | 7,16E-10 | 1 | Irf8     |
| Limd2    | 4,62E-14 | 0,614563961 | 0,765 | 0,326 | 7,32E-10 | 1 | Limd2    |
| Dusp1    | 5,08E-14 | 1,103805735 | 0,877 | 0,474 | 8,06E-10 | 1 | Dusp1    |
| Il18bp   | 5,36E-14 | 0,590276155 | 0,481 | 0,099 | 8,50E-10 | 1 | Il18bp   |
| Ier3     | 5,78E-14 | 1,028140617 | 0,778 | 0,397 | 9,16E-10 | 1 | Ier3     |
| Stx7     | 7,18E-14 | 0,695742817 | 0,827 | 0,421 | 1,14E-09 | 1 | Stx7     |
| Cot1     | 7,39E-14 | 0,          |       |       |          |   |          |



|           |             |             |       |       |             |     |           |
|-----------|-------------|-------------|-------|-------|-------------|-----|-----------|
| Cerk      | 0,001671041 | 0,255840249 | 0,543 | 0,347 | 1           | MAC | Cerk      |
| Nubp1     | 0,001682947 | 0,352596296 | 0,444 | 0,289 | 1           | MAC | Nubp1     |
| Tuba1c    | 0,001700921 | 0,299674033 | 0,79  | 0,603 | 1           | MAC | Tuba1c    |
| Rrbp1     | 0,001727621 | 0,288315791 | 0,938 | 0,835 | 1           | MAC | Rrbp1     |
| Brk1      | 0,001707722 | 0,287077428 | 0,815 | 0,711 | 1           | MAC | Brk1      |
| Ifnar2    | 0,001816522 | 0,305014514 | 0,667 | 0,517 | 1           | MAC | Ifnar2    |
| Sirt2     | 0,001851002 | 0,29959535  | 0,531 | 0,355 | 1           | MAC | Sirt2     |
| Cisd2     | 0,001872841 | 0,258851665 | 0,506 | 0,326 | 1           | MAC | Cisd2     |
| Washc2    | 0,001874363 | 0,325287528 | 0,407 | 0,244 | 1           | MAC | Washc2    |
| Ndufb10   | 0,001968151 | 0,274319719 | 0,765 | 0,719 | 1           | MAC | Ndufb10   |
| Camta2    | 0,002125487 | 0,325067527 | 0,407 | 0,256 | 1           | MAC | Camta2    |
| Htra2     | 0,002204692 | 0,318091171 | 0,309 | 0,165 | 1           | MAC | Htra2     |
| Slc25a5   | 0,002585475 | 0,291702116 | 0,938 | 0,888 | 1           | MAC | Slc25a5   |
| Comm9     | 0,002827814 | 0,276233384 | 0,333 | 0,186 | 1           | MAC | Comm9     |
| Nduf57    | 0,003125321 | 0,258165094 | 0,691 | 0,521 | 1           | MAC | Nduf57    |
| Rab11fip5 | 0,003313717 | 0,259085413 | 0,457 | 0,307 | 1           | MAC | Rab11fip5 |
| Bnip3     | 0,003384699 | 0,287352749 | 0,346 | 0,174 | 1           | MAC | Bnip3     |
| Cyp4f16   | 0,003393531 | 0,274379499 | 0,259 | 0,132 | 1           | MAC | Cyp4f16   |
| Herpud1   | 0,00362017  | 0,32477929  | 0,568 | 0,393 | 1           | MAC | Herpud1   |
| Phip      | 0,00378353  | 0,274333164 | 0,37  | 0,231 | 1           | MAC | Phip      |
| Ier5      | 0,004077352 | 0,302594807 | 0,444 | 0,298 | 1           | MAC | Ier5      |
| Zfp810    | 0,004144817 | 0,273331743 | 0,259 | 0,128 | 1           | MAC | Zfp810    |
| Rpl221    | 0,004217647 | 0,283652359 | 0,864 | 0,766 | 1           | MAC | Rpl221    |
| Preb      | 0,004552737 | 0,323296902 | 0,444 | 0,31  | 1           | MAC | Preb      |
| Oas1a     | 0,004839028 | 0,278052257 | 0,309 | 0,174 | 1           | MAC | Oas1a     |
| Rabgta    | 0,004937431 | 0,371226076 | 0,284 | 0,157 | 1           | MAC | Rabgta    |
| Nr4a1     | 0,004988915 | 0,608428637 | 0,494 | 0,351 | 1           | MAC | Nr4a1     |
| Lamtor3   | 0,0053705   | 0,32271594  | 0,519 | 0,413 | 1           | MAC | Lamtor3   |
| Leng8     | 0,00618549  | 0,277088141 | 0,58  | 0,417 | 1           | MAC | Leng8     |
| Ifnar1    | 0,006287453 | 0,313146503 | 0,63  | 0,467 | 1           | MAC | Ifnar1    |
| Dnajc13   | 0,006490648 | 0,263354753 | 0,346 | 0,215 | 1           | MAC | Dnajc13   |
| Itpril1   | 0,007411859 | 0,25218796  | 0,407 | 0,256 | 1           | MAC | Itpril1   |
| Rbck1     | 0,008204591 | 0,273263975 | 0,481 | 0,343 | 1           | MAC | Rbck1     |
| Hat1      | 0,008668322 | 0,321692578 | 0,358 | 0,223 | 1           | MAC | Hat1      |
| Atpv6v0d1 | 0,009870302 | 0,266712217 | 0,654 | 0,574 | 1           | MAC | Atpv6v0d1 |
| Tmem252   | 3,15E-17    | 0,823016189 | 0,976 | 0,506 | 4,99E-13    | TC  | Tmem252   |
| Tnfrs9    | 2,25E-16    | 0,891224275 | 0,585 | 0,145 | 3,56E-12    | TC  | Tnfrs9    |
| Esam      | 9,01E-16    | 0,762601895 | 0,988 | 0,647 | 1,43E-11    | TC  | Esam      |
| Cpe       | 2,13E-15    | 0,87507239  | 0,939 | 0,477 | 3,38E-11    | TC  | Cpe       |
| Igf1b7    | 2,82E-15    | 0,747603266 | 0,988 | 0,693 | 4,47E-11    | TC  | Igf1b7    |
| Tbx1      | 3,61E-15    | 0,482108457 | 0,402 | 0,054 | 5,72E-11    | TC  | Tbx1      |
| Pdlim1    | 8,07E-15    | 0,721956251 | 0,976 | 0,614 | 1,28E-10    | TC  | Pdlim1    |
| S100a11   | 2,54E-14    | 0,596465584 | 0,988 | 0,809 | 4,02E-10    | TC  | S100a11   |
| Eef1a1    | 2,93E-14    | 0,359834991 | 1     | 1     | 4,65E-10    | TC  | Eef1a1    |
| Cldn5     | 3,68E-14    | 0,960102031 | 0,963 | 0,627 | 5,84E-10    | TC  | Cldn5     |
| Vwa1      | 6,38E-14    | 0,783973987 | 0,951 | 0,627 | 1,01E-09    | TC  | Vwa1      |
| Igf1b3    | 1,41E-13    | 0,824192353 | 1     | 1     | 7,05E-09    | TC  | Igf1b3    |
| Adcy4     | 4,13E-13    | 0,691609538 | 0,707 | 0,27  | 6,55E-09    | TC  | Adcy4     |
| Tm4sf1    | 6,01E-13    | 0,714597809 | 0,988 | 0,639 | 9,53E-09    | TC  | Tm4sf1    |
| Ramp2     | 6,13E-13    | 0,583302166 | 0,988 | 0,606 | 9,72E-09    | TC  | Ramp2     |
| Fkbp1a    | 6,85E-13    | 0,550680874 | 1     | 1     | 1,09E-08    | TC  | Fkbp1a    |
| Itm2a     | 7,84E-13    | 0,96928811  | 0,488 | 0,124 | 1,24E-08    | TC  | Itm2a     |
| Sox17     | 1,38E-12    | 0,647802502 | 0,598 | 0,199 | 2,19E-08    | TC  | Sox17     |
| Egfl7     | 1,43E-12    | 0,617074937 | 0,988 | 0,676 | 2,27E-08    | TC  | Egfl7     |
| Car2      | 2,03E-12    | 0,577860939 | 0,5   | 0,133 | 3,22E-08    | TC  | Car2      |
| Sox18     | 2,31E-12    | 0,735765542 | 0,902 | 0,573 | 3,67E-08    | TC  | Sox18     |
| Dusp2     | 5,28E-12    | 0,618663687 | 0,744 | 0,328 | 8,37E-08    | TC  | Dusp2     |
| Ctnn      | 8,56E-12    | 0,61601156  | 0,793 | 0,373 | 1,36E-07    | TC  | Ctnn      |
| Prnp      | 1,32E-11    | 0,648312265 | 0,927 | 0,552 | 2,10E-07    | TC  | Prnp      |
| Clec14a   | 4,27E-11    | 0,727875027 | 0,854 | 0,452 | 6,78E-07    | TC  | Clec14a   |
| Tmem88    | 5,23E-11    | 0,52050525  | 0,951 | 0,61  | 7,92E-07    | TC  | Tmem88    |
| Tagln2    | 5,27E-11    | 0,579656078 | 0,939 | 0,838 | 8,36E-07    | TC  | Tagln2    |
| Gata2     | 7,44E-11    | 0,520428961 | 0,537 | 0,174 | 1,18E-06    | TC  | Gata2     |
| Cd34      | 9,91E-11    | 0,546632245 | 0,988 | 0,664 | 1,57E-06    | TC  | Cd34      |
| Thsd1     | 1,39E-10    | 0,569434592 | 0,756 | 0,365 | 2,20E-06    | TC  | Thsd1     |
| Cox1a     | 3,95E-10    | 0,408081382 | 0,951 | 0,618 | 6,25E-06    | TC  | Cox1a     |
| Impdh1    | 4,29E-10    | 0,506388904 | 0,744 | 0,373 | 6,80E-06    | TC  | Impdh1    |
| Lysmd2    | 4,38E-10    | 0,405117354 | 0,683 | 0,27  | 6,94E-06    | TC  | Lysmd2    |
| Grc10     | 5,28E-10    | 0,37500351  | 0,976 | 0,685 | 8,37E-06    | TC  | Grc10     |
| Maoa      | 6,21E-10    | 0,481987592 | 0,5   | 0,162 | 9,84E-06    | TC  | Maoa      |
| Armcx2    | 6,66E-10    | 0,417877115 | 0,549 | 0,195 | 1,06E-05    | TC  | Armcx2    |
| Copb2     | 7,08E-10    | 0,620490804 | 0,72  | 0,407 | 1,12E-05    | TC  | Copb2     |
| Adgr14    | 7,36E-10    | 0,572549531 | 0,976 | 0,618 | 1,17E-05    | TC  | Adgr14    |
| Npdc1     | 1,18E-09    | 0,457827796 | 0,817 | 0,398 | 1,86E-05    | TC  | Npdc1     |
| Abcg2     | 1,31E-09    | 0,556793794 | 0,854 | 0,506 | 2,08E-05    | TC  | Abcg2     |
| Rhoc      | 1,47E-09    | 0,532017079 | 0,963 | 0,651 | 2,32E-05    | TC  | Rhoc      |
| Csrp2     | 1,54E-09    | 0,329873245 | 0,622 | 0,274 | 2,44E-05    | TC  | Csrp2     |
| Mpz11     | 1,56E-09    | 0,439114944 | 0,878 | 0,49  | 2,48E-05    | TC  | Mpz11     |
| Scgb3a1   | 1,57E-09    | 0,10688038  | 0,524 | 0,183 | 2,49E-05    | TC  | Scgb3a1   |
| Grap      | 1,72E-09    | 0,508688325 | 0,756 | 0,382 | 2,73E-05    | TC  | Grap      |
| Rplp0     | 1,83E-09    | 0,360316676 | 1     | 0,979 | 2,91E-05    | TC  | Rplp0     |
| Mxra8     | 1,98E-09    | 0,466805308 | 0,707 | 0,32  | 3,14E-05    | TC  | Mxra8     |
| Stx6      | 2,07E-09    | 0,659899003 | 0,732 | 0,432 | 3,29E-05    | TC  | Stx6      |
| Cncd3     | 2,13E-09    | 0,524065264 | 0,841 | 0,531 | 3,37E-05    | TC  | Cncd3     |
| Slc2a1    | 2,15E-09    | 0,873112021 | 0,89  | 0,593 | 3,40E-05    | TC  | Slc2a1    |
| Cox1b     | 2,41E-09    | 0,293357495 | 0,951 | 0,585 | 3,82E-05    | TC  | Cox1b     |
| Rhoj      | 2,69E-09    | 0,446409557 | 0,817 | 0,465 | 4,26E-05    | TC  | Rhoj      |
| Tnfaip1   | 2,89E-09    | 0,440492444 | 0,927 | 0,598 | 4,58E-05    | TC  | Tnfaip1   |
| Vim       | 3,14E-09    | 0,444108182 | 1     | 0,971 | 4,97E-05    | TC  | Vim       |
| Cebpd     | 3,17E-09    | 0,634194324 | 0,695 | 0,394 | 5,02E-05    | TC  | Cebpd     |
| Pcdhgc3   | 3,84E-09    | 0,349896135 | 0,378 | 0,095 | 6,09E-05    | TC  | Pcdhgc3   |
| Ifitm3    | 3,85E-09    | 0,412280928 | 1     | 0,934 | 6,10E-05    | TC  | Ifitm3    |
| Actn4     | 3,94E-09    | 0,435539892 | 0,988 | 0,784 | 6,25E-05    | TC  | Actn4     |
| Hspb8     | 4,86E-09    | 0,648008937 | 0,72  | 0,378 | 7,70E-05    | TC  | Hspb8     |
| Itgb1     | 5,22E-09    | 0,554490641 | 1     | 0,921 | 8,27E-05    | TC  | Itgb1     |
| Robo4     | 5,58E-09    | 0,416599959 | 0,89  | 0,49  | 8,84E-05    | TC  | Robo4     |
| Rpl13     | 6,22E-09    | 0,296782766 | 1     | 0,988 | 9,86E-05    | TC  | Rpl13     |
| Prkcdp    | 7,00E-09    | 0,475400162 | 0,988 | 0,635 | 0,00011103  | TC  | Prkcdp    |
| St3gal6   | 7,04E-09    | 0,452014279 | 0,671 | 0,315 | 0,00011647  | TC  | St3gal6   |
| Fkbp10    | 7,54E-09    | 0,552074387 | 0,744 | 0,402 | 0,000119564 | TC  | Fkbp10    |
| Ctia2a    | 9,64E-09    | 0,481874353 | 0,988 | 0,668 | 0,000152746 | TC  | Ctia2a    |
| Ly6a      | 1,11E-08    | 0,518687329 | 0,963 | 0,718 | 0,000176545 | TC  | Ly6a      |
| Icam2     | 1,17E-08    | 0,424463218 | 0,902 | 0,56  | 0,000186182 | TC  | Icam2     |
| Arhgef7   | 1,22E-08    | 0,419585112 | 0,768 | 0,444 | 0,000192617 | TC  | Arhgef7   |
| Tpm1      | 1,29E-08    | 0,479282892 | 0,878 | 0,598 | 0,000204005 | TC  | Tpm1      |
| Ly6e      | 1,37E-08    | 0,425740322 | 0,988 | 0,992 | 0,000217867 | TC  | Ly6e      |
| H2-Q6     | 1,55E-08    | 0,52548706  | 0,695 | 0,365 | 0,000245518 | TC  | H2-Q6     |
| Grrp1     | 1,64E-08    | 0,397779347 | 0,707 | 0,321 | 0,000260564 | TC  | Grrp1     |
| Ldha      | 1,86E-08    | 0,438139412 | 0,951 | 0,921 | 0,000295483 | TC  | Ldha      |
| Lsr       | 1,98E-08    | 0,502316235 | 0,5   | 0,183 | 0,000314452 | TC  | Lsr       |
| Arhgef15  | 2,54E-08    | 0,308224159 | 0,841 | 0,498 | 0,000402936 | TC  | Arhgef15  |
| Cd200     | 2,55E-08    | 0,464570118 | 0,976 | 0,676 | 0,000404286 | TC  | Cd200     |
| Tbrg1     | 2,74E-08    | 0,464351755 | 0,768 | 0,432 | 0,000433976 | TC  | Tbrg1     |
| Cnn3      | 2,80E-08    | 0,376790191 | 1     | 0,647 | 0,000443824 | TC  | Cnn3      |
| S100a16   | 2,96E-08    | 0,423755033 | 0,927 | 0,593 | 0,000468723 | TC  | S100a16   |
| Acer2     | 3,18E-08    | 0,51885655  | 0,622 | 0,274 | 0,000504194 | TC  | Acer2     |
| Rbpm5     | 4,78E-08    | 0,3703281   | 0,927 | 0,573 | 0,000757378 | TC  | Rbpm5     |
| Acrv11    | 4,98E-08    | 0,527987203 | 0,841 | 0,527 | 0,000789819 | TC  | Acrv11    |
| Ly6c1     | 5,31E-08    | 0,491027113 | 0,927 | 0,548 | 0,000841357 | TC  | Ly6c1     |
| Nectin2   | 6,19E-08    | 0,516664032 | 0,683 | 0,357 | 0,000980758 | TC  | Nectin2   |

|          |          |             |       |       |          |   |          |
|----------|----------|-------------|-------|-------|----------|---|----------|
| Taldo1   | 3,49E-10 | 0,504992913 | 0,864 | 0,603 | 5,53E-06 | 1 | Taldo1   |
| Rpl26    | 3,70E-10 | 0,332330144 | 1     | 0,963 | 5,87E-06 | 1 | Rpl26    |
| C1cn7    | 4,20E-10 | 0,574743996 | 0,531 | 0,194 | 6,66E-06 | 1 | C1cn7    |
| Dnase111 | 4,32E-10 | 0,386661687 | 0,42  | 0,107 | 6,84E-06 | 1 | Dnase111 |
| Fkbp2    | 4,40E-10 | 0,409685297 | 0,716 | 0,393 | 6,98E-06 | 1 | Fkbp2    |
| AI413582 | 4,44E-10 | 0,435651638 | 0,58  | 0,26  | 7,03E-06 | 1 | AI413582 |
| Oas1g    | 4,72E-10 | 0,308331101 | 0,284 | 0,041 | 7,48E-06 | 1 | Oas1g    |
| Slc35f6  | 4,75E-10 | 0,266989958 | 0,407 | 0,095 | 7,53E-06 | 1 | Slc35f6  |
| Cited2   | 6,22E-10 | 0,261250454 | 0,333 | 0,066 | 9,85E-06 | 1 | Cited2   |
| Khk      | 6,63E-10 | 0,268554416 | 0,259 | 0,033 | 1,05E-05 | 1 | Khk      |
| Ppp1r18  | 7,91E-10 | 0,466495029 | 0,815 | 0,534 | 1,25E-05 | 1 | Ppp1r18  |
| Rassf2   | 8,37E-10 | 0,265859129 | 0,667 | 0,273 | 1,33E-05 | 1 | Rassf2   |
| Plekha2  | 9,11E-10 | 0,32913824  | 0,37  | 0,083 | 1,44E-05 | 1 | Plekha2  |
| Gabarap  | 9,52E-10 | 0,465031578 | 0,975 | 0,806 | 1,51E-05 | 1 | Gabarap  |
| Pisd-ps1 | 9,61E-10 | 0,415847684 | 0,568 | 0,252 | 1,52E-05 | 1 | Pisd-ps1 |
| Nfkbiz   | 1,11E-09 | 0,803398477 | 0,63  | 0,298 | 1,76E-05 | 1 | Nfkbiz   |
| Trim8    | 1,14E-09 | 0,316832618 | 0,58  | 0,236 | 1,81E-05 | 1 | Trim8    |
| Pacs2    | 1,15E-09 | 0,326344429 | 0,444 | 0,136 | 1,82E-05 | 1 | Pacs2    |
| Gga1     | 1,17E-09 | 0,287208463 | 0,531 | 0,19  | 1,86E-05 | 1 | Gga1     |
| Kdm7a    | 1,18E-09 | 0,27440017  | 0,481 | 0,153 | 1,87E-05 | 1 | Kdm      |

|               |          |             |       |       |             |   |    |               |
|---------------|----------|-------------|-------|-------|-------------|---|----|---------------|
| Wfdc1         | 6,31E-08 | 0,432724312 | 0,256 | 0,05  | 0,000999998 | T | Ec | Wfdc1         |
| Escr          | 6,48E-08 | 0,374573642 | 0,976 | 0,647 | 0,001026418 | T | Ec | Escr          |
| Ushbp1        | 6,58E-08 | 0,399820977 | 0,78  | 0,473 | 0,001042486 | T | Ec | Ushbp1        |
| Tspan3        | 7,71E-08 | 0,467716208 | 0,671 | 0,349 | 0,001222556 | T | Ec | Tspan3        |
| 9430020K01Rik | 8,34E-08 | 0,303883539 | 0,915 | 0,481 | 0,001322416 | T | Ec | 9430020K01Rik |
| Nedd4         | 8,37E-08 | 0,377398486 | 0,951 | 0,639 | 0,001326877 | T | Ec | Nedd4         |
| Tsc22d1       | 8,45E-08 | 0,613130367 | 0,841 | 0,51  | 0,001339329 | T | Ec | Tsc22d1       |
| Ptfr          | 8,89E-08 | 0,406101603 | 0,963 | 0,614 | 0,001408555 | T | Ec | Ptfr          |
| Tmem43        | 9,59E-08 | 0,569684015 | 0,549 | 0,253 | 0,001520776 | T | Ec | Tmem43        |
| Ptpr          | 9,93E-08 | 0,315851266 | 0,732 | 0,373 | 0,001573465 | T | Ec | Ptpr          |
| H2-Q7         | 1,02E-07 | 0,529178343 | 0,854 | 0,589 | 0,001618428 | T | Ec | H2-Q7         |
| Atp5b         | 1,13E-07 | 0,441417165 | 0,951 | 0,909 | 0,001794007 | T | Ec | Atp5b         |
| Dstn          | 1,19E-07 | 0,472931624 | 0,915 | 0,763 | 0,001882732 | T | Ec | Dstn          |
| Upp1          | 1,22E-07 | 0,436551436 | 0,902 | 0,535 | 0,001928108 | T | Ec | Upp1          |
| Map4k5        | 1,23E-07 | 0,384573362 | 0,744 | 0,398 | 0,001944014 | T | Ec | Map4k5        |
| Arf4          | 1,25E-07 | 0,469907911 | 0,927 | 0,751 | 0,001985047 | T | Ec | Arf4          |
| Smtn          | 1,39E-07 | 0,361939302 | 0,854 | 0,494 | 0,002197384 | T | Ec | Smtn          |
| Meox1         | 1,44E-07 | 0,471030642 | 0,695 | 0,386 | 0,002288262 | T | Ec | Meox1         |
| Eif4g2        | 1,47E-07 | 0,407585471 | 0,976 | 0,88  | 0,002335678 | T | Ec | Eif4g2        |
| Bcam          | 1,49E-07 | 0,33290461  | 0,402 | 0,137 | 0,00236304  | T | Ec | Bcam          |
| Gm10123       | 1,51E-07 | 0,283411564 | 0,988 | 0,988 | 0,00239179  | T | Ec | Gm10123       |
| Tax1bp3       | 1,58E-07 | 0,385392714 | 0,915 | 0,685 | 0,002498471 | T | Ec | Tax1bp3       |
| Adgrg1        | 1,77E-07 | 0,4055812   | 0,707 | 0,382 | 0,002799458 | T | Ec | Adgrg1        |
| Eif5a         | 1,80E-07 | 0,423060832 | 0,988 | 0,929 | 0,002850584 | T | Ec | Eif5a         |
| Lef1          | 1,84E-07 | 0,322660703 | 0,341 | 0,104 | 0,002920113 | T | Ec | Lef1          |
| Rmnd5b        | 2,00E-07 | 0,33780344  | 0,561 | 0,245 | 0,003174285 | T | Ec | Rmnd5b        |
| Slc7a5        | 2,08E-07 | 0,330476085 | 0,5   | 0,191 | 0,0032964   | T | Ec | Slc7a5        |
| Mcam          | 2,14E-07 | 0,441792822 | 1     | 0,639 | 0,003392892 | T | Ec | Mcam          |
| Slc39a8       | 2,28E-07 | 0,475907959 | 0,488 | 0,207 | 0,003615648 | T | Ec | Slc39a8       |
| Vwf           | 2,36E-07 | 0,410254989 | 0,939 | 0,606 | 0,003739535 | T | Ec | Vwf           |
| Silco2b1      | 2,44E-07 | 0,600380719 | 0,646 | 0,386 | 0,003872263 | T | Ec | Silco2b1      |
| Gimap5        | 2,50E-07 | 0,294991962 | 0,756 | 0,398 | 0,003965052 | T | Ec | Gimap5        |
| Arf1          | 2,52E-07 | 0,365444011 | 0,988 | 0,921 | 0,00399371  | T | Ec | Arf1          |
| Bok           | 2,60E-07 | 0,449362824 | 0,634 | 0,315 | 0,004123365 | T | Ec | Bok           |
| Ankrd37       | 2,61E-07 | 0,538580249 | 0,561 | 0,278 | 0,00413013  | T | Ec | Ankrd37       |
| Rela          | 2,89E-07 | 0,426504701 | 0,72  | 0,448 | 0,004588992 | T | Ec | Rela          |
| Mall          | 2,99E-07 | 0,262824575 | 0,561 | 0,286 | 0,004737591 | T | Ec | Mall          |
| Id3           | 3,00E-07 | 0,456418034 | 0,841 | 0,465 | 0,004754232 | T | Ec | Id3           |
| Phb           | 3,21E-07 | 0,291132383 | 0,78  | 0,502 | 0,005093723 | T | Ec | Phb           |
| Ercc1         | 3,30E-07 | 0,301939076 | 0,634 | 0,311 | 0,005226835 | T | Ec | Ercc1         |
| Snrk          | 3,33E-07 | 0,499739374 | 0,902 | 0,614 | 0,005284882 | T | Ec | Snrk          |
| Rasip1        | 3,36E-07 | 0,338623152 | 0,854 | 0,51  | 0,005319068 | T | Ec | Rasip1        |
| Pdlim7        | 3,43E-07 | 0,39077543  | 0,915 | 0,664 | 0,005443408 | T | Ec | Pdlim7        |
| Sparc         | 3,48E-07 | 0,396511425 | 1     | 0,722 | 0,005510587 | T | Ec | Sparc         |
| Trp53i11      | 4,07E-07 | 0,62858834  | 0,841 | 0,61  | 0,006446555 | T | Ec | Trp53i11      |
| Ocln          | 4,08E-07 | 0,417400576 | 0,341 | 0,108 | 0,006474005 | T | Ec | Ocln          |
| Vcl           | 4,18E-07 | 0,37650416  | 0,683 | 0,361 | 0,006626308 | T | Ec | Vcl           |
| Elk3          | 4,57E-07 | 0,306941257 | 1     | 0,759 | 0,007240884 | T | Ec | Elk3          |
| Lta4h         | 4,69E-07 | 0,330471934 | 0,732 | 0,419 | 0,00743444  | T | Ec | Lta4h         |
| Cdc42ep4      | 4,70E-07 | 0,372057946 | 0,524 | 0,237 | 0,007445985 | T | Ec | Cdc42ep4      |
| Fam167b       | 4,80E-07 | 0,372640579 | 0,805 | 0,469 | 0,007612037 | T | Ec | Fam167b       |
| Bcl6b         | 5,28E-07 | 0,461664642 | 0,573 | 0,274 | 0,008375254 | T | Ec | Bcl6b         |
| Lyla1         | 5,81E-07 | 0,356400336 | 0,768 | 0,477 | 0,009202994 | T | Ec | Lyla1         |
| Ufd1          | 5,88E-07 | 0,320563102 | 0,622 | 0,32  | 0,009314338 | T | Ec | Ufd1          |
| Gcsh          | 5,95E-07 | 0,4074231   | 0,561 | 0,299 | 0,009434681 | T | Ec | Gcsh          |
| Nam129a       | 6,12E-07 | 0,30899188  | 0,427 | 0,158 | 0,009701833 | T | Ec | Nam129a       |
| Nostrin       | 6,30E-07 | 0,294241202 | 0,817 | 0,473 | 0,00985131  | T | Ec | Nostrin       |
| Gimap4        | 6,80E-07 | 0,391484104 | 0,854 | 0,531 | 0,010778424 | T | Ec | Gimap4        |
| Kank3         | 6,92E-07 | 0,51805767  | 0,671 | 0,415 | 0,010967245 | T | Ec | Kank3         |
| Rab11a        | 7,13E-07 | 0,413571596 | 0,976 | 0,809 | 0,011304786 | T | Ec | Rab11a        |
| Lpcat4        | 8,01E-07 | 0,265379089 | 0,39  | 0,141 | 0,012705171 | T | Ec | Lpcat4        |
| Eif2s2        | 8,36E-07 | 0,301281907 | 0,951 | 0,813 | 0,013255159 | T | Ec | Eif2s2        |
| Calu          | 9,35E-07 | 0,436883317 | 0,927 | 0,697 | 0,014821579 | T | Ec | Calu          |
| Mgp           | 9,41E-07 | 0,443514164 | 0,427 | 0,154 | 0,014913658 | T | Ec | Mgp           |
| Arddc3        | 9,73E-07 | 0,562602754 | 0,573 | 0,286 | 0,015417812 | T | Ec | Arddc3        |
| Tspan13       | 9,80E-07 | 0,501905729 | 0,695 | 0,39  | 0,015538214 | T | Ec | Tspan13       |
| Tuba1a        | 1,02E-06 | 0,463288595 | 0,927 | 0,651 | 0,016168662 | T | Ec | Tuba1a        |
| Polr2b        | 1,03E-06 | 0,282689312 | 0,78  | 0,502 | 0,016258881 | T | Ec | Polr2b        |
| Lgals9        | 1,04E-06 | 0,40672392  | 0,976 | 0,896 | 0,016482774 | T | Ec | Lgals9        |
| Lpin3         | 1,06E-06 | 0,367443228 | 0,366 | 0,129 | 0,016761079 | T | Ec | Lpin3         |
| Lhfp          | 1,07E-06 | 0,33839898  | 0,268 | 0,071 | 0,016977114 | T | Ec | Lhfp          |
| Cf12          | 1,12E-06 | 0,398700393 | 0,561 | 0,282 | 0,017691043 | T | Ec | Cf12          |
| Capg          | 1,13E-06 | 0,402011624 | 0,951 | 0,718 | 0,017950629 | T | Ec | Capg          |
| Cnbp          | 1,13E-06 | 0,367091774 | 0,976 | 0,88  | 0,017971806 | T | Ec | Cnbp          |
| Sept4         | 1,15E-06 | 0,454493291 | 0,659 | 0,365 | 0,018202075 | T | Ec | Sept4         |
| Ick           | 1,26E-06 | 0,333726464 | 0,463 | 0,199 | 0,019926274 | T | Ec | Ick           |
| Scarf1        | 1,26E-06 | 0,36600928  | 0,646 | 0,324 | 0,019999257 | T | Ec | Scarf1        |
| Chchd2        | 1,28E-06 | 0,263073323 | 0,951 | 0,909 | 0,020302137 | T | Ec | Chchd2        |
| Csrp1         | 1,45E-06 | 0,416660052 | 0,744 | 0,506 | 0,022992559 | T | Ec | Csrp1         |
| Rrp1          | 1,57E-06 | 0,408661767 | 0,744 | 0,485 | 0,024857986 | T | Ec | Rrp1          |
| Lyla2         | 1,59E-06 | 0,266428752 | 0,707 | 0,419 | 0,025189228 | T | Ec | Lyla2         |
| Nid2          | 1,62E-06 | 0,476300785 | 0,89  | 0,535 | 0,025743542 | T | Ec | Nid2          |
| Actg1         | 1,64E-06 | 0,38529985  | 1     | 0,992 | 0,025974992 | T | Ec | Actg1         |
| Arhgap29      | 1,72E-06 | 0,376996216 | 0,817 | 0,469 | 0,027234926 | T | Ec | Arhgap29      |
| Eogt          | 1,81E-06 | 0,449450132 | 0,659 | 0,353 | 0,028617829 | T | Ec | Eogt          |
| Tubb6         | 1,88E-06 | 0,427891917 | 0,927 | 0,676 | 0,029815818 | T | Ec | Tubb6         |
| Fermt2        | 1,94E-06 | 0,315703894 | 0,829 | 0,527 | 0,030811613 | T | Ec | Fermt2        |
| Prosl1        | 1,99E-06 | 0,334148384 | 0,72  | 0,411 | 0,031473423 | T | Ec | Prosl1        |
| Trib2         | 2,08E-06 | 0,359739278 | 0,451 | 0,191 | 0,032996176 | T | Ec | Trib2         |
| Prss23        | 2,11E-06 | 0,445629851 | 0,878 | 0,531 | 0,033396001 | T | Ec | Prss23        |
| Rpl6          | 2,39E-06 | 0,250494547 | 1     | 0,992 | 0,037963497 | T | Ec | Rpl6          |
| Rnf14         | 2,42E-06 | 0,353093283 | 0,561 | 0,286 | 0,038352753 | T | Ec | Rnf14         |
| Crtap         | 2,44E-06 | 0,309281676 | 0,707 | 0,402 | 0,038634598 | T | Ec | Crtap         |
| Cdh2          | 2,46E-06 | 0,259995317 | 0,378 | 0,137 | 0,038928064 | T | Ec | Cdh2          |
| Fam43a        | 2,52E-06 | 0,382195557 | 0,659 | 0,361 | 0,039878095 | T | Ec | Fam43a        |
| Eef1g         | 2,68E-06 | 0,373874095 | 0,963 | 0,809 | 0,042554735 | T | Ec | Eef1g         |
| Anxa7         | 2,82E-06 | 0,402971845 | 0,78  | 0,535 | 0,044773648 | T | Ec | Anxa7         |
| Afaf11        | 2,86E-06 | 0,390573585 | 0,732 | 0,436 | 0,045042542 | T | Ec | Afaf11        |
| Tmem44        | 3,08E-06 | 0,380382786 | 0,341 | 0,12  | 0,048754327 | T | Ec | Tmem44        |
| Sh2d3c        | 3,17E-06 | 0,357489871 | 0,805 | 0,548 | 0,050241955 | T | Ec | Sh2d3c        |
| Eif4a-ps4     | 3,60E-06 | 0,324428056 | 0,732 | 0,535 | 0,057004889 | T | Ec | Eif4a-ps4     |
| Clic4         | 3,80E-06 | 0,392606752 | 0,951 | 0,817 | 0,060306894 | T | Ec | Clic4         |
| Trp53         | 3,92E-06 | 0,34729513  | 0,732 | 0,481 | 0,062213779 | T | Ec | Trp53         |
| Tnfrsp1       | 4,16E-06 | 0,296409325 | 0,561 | 0,274 | 0,065999638 | T | Ec | Tnfrsp1       |
| Gabpp1        | 4,21E-06 | 0,27264265  | 0,5   | 0,288 | 0,066720788 | T | Ec | Gabpp1        |
| Myo1b         | 4,34E-06 | 0,365802447 | 0,78  | 0,494 | 0,068796564 | T | Ec | Myo1b         |
| Rps6-ps4      | 4,35E-06 | 0,255016402 | 0,988 | 0,959 | 0,069008103 | T | Ec | Rps6-ps4      |
| Ftgd1         | 4,44E-06 | 0,262487762 | 0,646 | 0,357 | 0,070314408 | T | Ec | Ftgd1         |
| Hmgd3         | 4,72E-06 | 0,250565336 | 0,573 | 0,274 | 0,074826717 | T | Ec | Hmgd3         |
| Osbpl9        | 4,90E-06 | 0,385795094 | 0,756 | 0,548 | 0,077647563 | T | Ec | Osbpl9        |
| Rpl15-ps3     | 5,23E-06 | 0,270308594 | 0,927 | 0,909 | 0,082863051 | T | Ec | Rpl15-ps3     |
| Ica1          | 5,23E-06 | 0,302138386 | 0,61  | 0,36  | 0,082897974 | T | Ec | Ica1          |
| Rps2          | 5,42E-06 | 0,289742078 | 0,988 | 0,988 | 0,085927405 | T | Ec | Rps2          |
| Id1           | 5,43E-06 | 0,492030735 | 0,72  | 0,448 | 0,086100989 | T | Ec | Id1           |
| Cav1          | 5,62E-06 | 0,54487878  | 0,72  | 0,477 | 0,089069239 | T | Ec | Cav1          |
| AU021092      | 5,63E-06 | 0,257000161 | 0,476 | 0,199 | 0,089170177 | T | Ec | AU021092      |
| Tek           | 5,78E-06 | 0,252081806 | 0,768 | 0,432 | 0,091612331 | T | Ec | Tek           |
| Trim47        | 6,03E-06 | 0,346110491 | 0,476 | 0,212 | 0,09560695  | T | Ec | Trim47        |
| Fbxw9         | 6,06E-06 | 0,258548741 | 0,317 | 0,108 | 0,096109653 | T | Ec | Fbxw9         |
| Bambi         | 6,07E-06 | 0,355276422 | 0,537 | 0,257 | 0,096188928 | T | Ec | Bambi         |

|       |          |             |       |       |             |   |    |       |
|-------|----------|-------------|-------|-------|-------------|---|----|-------|
| Nptn  | 3,60E-07 | 0,474010964 | 0,716 | 0,475 | 0,005704295 | T | Ec | Nptn  |
| Dpp7  | 3,78E-07 | 0,264869139 | 0,284 | 0,07  | 0,005995632 | T | Ec | Dpp7  |
| Tpp1  | 4,17E-07 | 0,450689817 | 0,79  | 0,517 | 0,006611116 | T | Ec | Tpp1  |
| Dleu2 | 4,20E-07 | 0,322452128 | 0,605 | 0,306 | 0,006653505 | T | Ec | Dleu2 |
| Pigs  | 4,45E-07 | 0,456990012 | 0,519 | 0,227 | 0,007060433 | T | Ec | Pigs  |
| Cdt1  | 4,85E-07 | 0,251512871 | 0,346 | 0,103 | 0,007682716 | T | Ec | Cdt1  |
| Taf6l | 4,86E-07 | 0,363202758 | 0,593 | 0,293 | 0,007709968 | T | Ec | Taf6l |
| Cox14 | 5,11E-07 | 0,342245265 | 0,691 | 0,45  | 0,008108268 |   |    |       |

|               |          |             |       |       |             |   |    |               |
|---------------|----------|-------------|-------|-------|-------------|---|----|---------------|
| Sema6d        | 6,28E-06 | 0,250383969 | 0,89  | 0,535 | 0,099492562 | T | EC | Sema6d        |
| Cyp2j6        | 6,30E-06 | 0,291832023 | 0,305 | 0,1   | 0,099811296 | T | EC | Cyp2j6        |
| Tm9sf2        | 6,50E-06 | 0,346984137 | 0,915 | 0,71  | 0,1030946   | T | EC | Tm9sf2        |
| Bhlhe40       | 6,60E-06 | 0,52660806  | 0,78  | 0,564 | 0,104577512 | T | EC | Bhlhe40       |
| Alas1         | 6,99E-06 | 0,4465916   | 0,622 | 0,344 | 0,110805631 | T | EC | Alas1         |
| Plik2         | 7,42E-06 | 0,390617344 | 0,927 | 0,676 | 0,117610059 | T | EC | Plik2         |
| Slc25a3       | 7,54E-06 | 0,348393432 | 0,939 | 0,867 | 0,119475447 | T | EC | Slc25a3       |
| Ppic          | 7,65E-06 | 0,353644682 | 0,939 | 0,647 | 0,121338104 | T | EC | Ppic          |
| Lrrc8c        | 7,79E-06 | 0,380456012 | 0,793 | 0,556 | 0,123547509 | T | EC | Lrrc8c        |
| Rars          | 7,85E-06 | 0,308588328 | 0,549 | 0,278 | 0,124426846 | T | EC | Rars          |
| Tie1          | 7,88E-06 | 0,301167906 | 0,866 | 0,56  | 0,124915876 | T | EC | Tie1          |
| Ackr2         | 8,54E-06 | 0,41685338  | 0,512 | 0,257 | 0,13539986  | T | EC | Ackr2         |
| Igf1bp4       | 9,01E-06 | 0,416875378 | 0,927 | 0,734 | 0,142789163 | T | EC | Igf1bp4       |
| Ddah2         | 9,24E-06 | 0,299551222 | 0,683 | 0,378 | 0,14645499  | T | EC | Ddah2         |
| Flt1          | 9,25E-06 | 0,398640498 | 0,963 | 0,647 | 0,146588291 | T | EC | Flt1          |
| Arl1          | 9,29E-06 | 0,308389944 | 0,756 | 0,502 | 0,147318107 | T | EC | Arl1          |
| Cd320         | 9,32E-06 | 0,299545717 | 0,341 | 0,129 | 0,147747552 | T | EC | Cd320         |
| Ubl7          | 9,37E-06 | 0,296953334 | 0,61  | 0,361 | 0,148473301 | T | EC | Ubl7          |
| Prkd2         | 9,49E-06 | 0,282254578 | 0,671 | 0,361 | 0,150403522 | T | EC | Prkd2         |
| Spata6        | 9,69E-06 | 0,262951903 | 0,598 | 0,307 | 0,153623506 | T | EC | Spata6        |
| Atp5c1        | 9,81E-06 | 0,376896725 | 0,915 | 0,697 | 0,154586894 | T | EC | Atp5c1        |
| Psmc3         | 1,02E-05 | 0,348102301 | 0,854 | 0,739 | 0,161390505 | T | EC | Psmc3         |
| Flnb          | 1,04E-05 | 0,262901826 | 0,78  | 0,465 | 0,164142374 | T | EC | Flnb          |
| Mrp17         | 1,08E-05 | 0,305747555 | 0,902 | 0,656 | 0,170937975 | T | EC | Mrp17         |
| Adamts1       | 1,14E-05 | 0,510500445 | 0,78  | 0,498 | 0,180625804 | T | EC | Adamts1       |
| Cops5         | 1,18E-05 | 0,425545605 | 0,622 | 0,39  | 0,187418596 | T | EC | Cops5         |
| Fzd6          | 1,23E-05 | 0,250378561 | 0,488 | 0,237 | 0,195120714 | T | EC | Fzd6          |
| Tmsb10        | 1,24E-05 | 0,305035649 | 1     | 0,967 | 0,19645351  | T | EC | Tmsb10        |
| Slc9a3r2      | 1,25E-05 | 0,325462082 | 0,841 | 0,552 | 0,19769553  | T | EC | Slc9a3r2      |
| Tsen34        | 1,26E-05 | 0,349601774 | 0,683 | 0,436 | 0,200244423 | T | EC | Tsen34        |
| B3gnt3        | 1,29E-05 | 0,306303045 | 0,793 | 0,485 | 0,204800323 | T | EC | B3gnt3        |
| Slc25a4       | 1,32E-05 | 0,32803961  | 0,939 | 0,822 | 0,209539462 | T | EC | Slc25a4       |
| Myl12a        | 1,34E-05 | 0,251440614 | 1     | 0,954 | 0,213053751 | T | EC | Myl12a        |
| Lxn           | 1,36E-05 | 0,299701885 | 0,854 | 0,564 | 0,215230097 | T | EC | Lxn           |
| Palmd         | 1,44E-05 | 0,404722203 | 0,634 | 0,382 | 0,227967763 | T | EC | Palmd         |
| Serinc3       | 1,48E-05 | 0,265769565 | 0,988 | 0,983 | 0,234017429 | T | EC | Serinc3       |
| Slc30a4       | 1,48E-05 | 0,377173272 | 0,354 | 0,149 | 0,242028836 | T | EC | Slc30a4       |
| Tspan15       | 1,49E-05 | 0,266326726 | 0,573 | 0,299 | 0,235735297 | T | EC | Tspan15       |
| Gipc1         | 1,54E-05 | 0,309300611 | 0,72  | 0,448 | 0,243355619 | T | EC | Gipc1         |
| Ndufs2        | 1,60E-05 | 0,319495291 | 0,768 | 0,523 | 0,253550572 | T | EC | Ndufs2        |
| Rps5          | 1,64E-05 | 0,280738757 | 1     | 0,946 | 0,259894041 | T | EC | Rps5          |
| S100a6        | 1,66E-05 | 0,314000382 | 0,988 | 0,768 | 0,263864275 | T | EC | S100a6        |
| Cd82          | 1,75E-05 | 0,45639662  | 0,598 | 0,357 | 0,277039428 | T | EC | Cd82          |
| Rab6a         | 1,75E-05 | 0,273247476 | 0,768 | 0,519 | 0,277164796 | T | EC | Rab6a         |
| Tpm3          | 1,75E-05 | 0,268065349 | 0,976 | 0,946 | 0,27808094  | T | EC | Tpm3          |
| Itm2c         | 1,90E-05 | 0,381559995 | 0,939 | 0,851 | 0,301187803 | T | EC | Itm2c         |
| Hnrnpk        | 1,93E-05 | 0,354661262 | 1     | 0,959 | 0,305189796 | T | EC | Hnrnpk        |
| Pglyrp1       | 2,03E-05 | 0,279769801 | 0,561 | 0,299 | 0,322213695 | T | EC | Pglyrp1       |
| Anxa2         | 2,08E-05 | 0,346345768 | 1     | 0,826 | 0,329758393 | T | EC | Anxa2         |
| Cyb5r3        | 2,18E-05 | 0,302959945 | 0,915 | 0,664 | 0,345019658 | T | EC | Cyb5r3        |
| She           | 2,18E-05 | 0,295663731 | 0,585 | 0,315 | 0,34562321  | T | EC | She           |
| Rer1          | 2,18E-05 | 0,294891687 | 0,854 | 0,656 | 0,345684761 | T | EC | Rer1          |
| Cdipt         | 2,18E-05 | 0,36597326  | 0,829 | 0,577 | 0,345752526 | T | EC | Cdipt         |
| Eif3m         | 2,23E-05 | 0,300118193 | 0,829 | 0,585 | 0,353910452 | T | EC | Eif3m         |
| Nrbp1         | 2,29E-05 | 0,387510919 | 0,756 | 0,544 | 0,363369354 | T | EC | Nrbp1         |
| Ece1          | 2,29E-05 | 0,28633203  | 1     | 0,689 | 0,363596515 | T | EC | Ece1          |
| Hes1          | 2,30E-05 | 0,3186896   | 0,768 | 0,515 | 0,364165972 | T | EC | Hes1          |
| Puf60         | 2,33E-05 | 0,323807521 | 0,768 | 0,531 | 0,369397924 | T | EC | Puf60         |
| Mtmr11        | 2,41E-05 | 0,322817228 | 0,415 | 0,191 | 0,382105717 | T | EC | Mtmr11        |
| Cct5          | 2,52E-05 | 0,3568722   | 0,866 | 0,693 | 0,398903049 | T | EC | Cct5          |
| Pex14         | 2,62E-05 | 0,253813202 | 0,415 | 0,195 | 0,415879061 | T | EC | Pex14         |
| Ppp1r2        | 2,67E-05 | 0,399797259 | 0,829 | 0,602 | 0,423751933 | T | EC | Ppp1r2        |
| Gimap6        | 2,70E-05 | 0,260830815 | 0,951 | 0,631 | 0,427292113 | T | EC | Gimap6        |
| Aplnr         | 2,70E-05 | 0,361572297 | 0,78  | 0,49  | 0,428675839 | T | EC | Aplnr         |
| Gnb4          | 2,70E-05 | 0,30445457  | 0,659 | 0,378 | 0,428677019 | T | EC | Gnb4          |
| Serpin6b      | 2,73E-05 | 0,329604835 | 0,28  | 0,1   | 0,433507493 | T | EC | Serpin6b      |
| Ssr2          | 2,86E-05 | 0,288179427 | 0,793 | 0,589 | 0,45015202  | T | EC | Ssr2          |
| Adm           | 2,90E-05 | 0,396018488 | 0,524 | 0,261 | 0,459457511 | T | EC | Adm           |
| Kitl          | 2,92E-05 | 0,294326439 | 0,524 | 0,261 | 0,46278349  | T | EC | Kitl          |
| Tfg           | 2,96E-05 | 0,263484991 | 0,646 | 0,369 | 0,468908876 | T | EC | Tfg           |
| Ptp4a3        | 3,12E-05 | 0,251318797 | 0,78  | 0,556 | 0,494760917 | T | EC | Ptp4a3        |
| Preli1        | 3,25E-05 | 0,280176091 | 0,963 | 0,867 | 0,514527627 | T | EC | Preli1        |
| Cav2          | 3,25E-05 | 0,337565739 | 0,768 | 0,498 | 0,515255689 | T | EC | Cav2          |
| Morf4l2       | 3,34E-05 | 0,3699902   | 0,902 | 0,78  | 0,529230546 | T | EC | Morf4l2       |
| Nmi           | 3,35E-05 | 0,282326238 | 0,524 | 0,295 | 0,530472241 | T | EC | Nmi           |
| Tpm4          | 3,38E-05 | 0,329377638 | 0,988 | 0,905 | 0,535920435 | T | EC | Tpm4          |
| Surf4         | 3,41E-05 | 0,394739082 | 0,854 | 0,693 | 0,540481511 | T | EC | Surf4         |
| Mtx2          | 3,64E-05 | 0,277375784 | 0,537 | 0,29  | 0,57686998  | T | EC | Mtx2          |
| Sorbs3        | 3,80E-05 | 0,284122937 | 0,902 | 0,614 | 0,602918398 | T | EC | Sorbs3        |
| Adam15        | 3,81E-05 | 0,3700465   | 0,915 | 0,78  | 0,603614624 | T | EC | Adam15        |
| Sox7          | 3,81E-05 | 0,339353008 | 0,768 | 0,51  | 0,603969486 | T | EC | Sox7          |
| Lpcat3        | 3,85E-05 | 0,305663784 | 0,427 | 0,207 | 0,61006984  | T | EC | Lpcat3        |
| F2r           | 3,85E-05 | 0,501262933 | 0,537 | 0,303 | 0,610625159 | T | EC | F2r           |
| Efn1          | 4,00E-05 | 0,256977581 | 0,878 | 0,568 | 0,634709116 | T | EC | Efn1          |
| Eng           | 4,02E-05 | 0,289926412 | 0,976 | 0,747 | 0,636748246 | T | EC | Eng           |
| Tmem204       | 4,07E-05 | 0,273164435 | 0,78  | 0,473 | 0,645706202 | T | EC | Tmem204       |
| 1110004F10Rik | 4,10E-05 | 0,331191603 | 0,817 | 0,568 | 0,649198949 | T | EC | 1110004F10Rik |
| Abcb1a        | 4,13E-05 | 0,409092243 | 0,549 | 0,336 | 0,654207213 | T | EC | Abcb1a        |
| Bzw1          | 4,15E-05 | 0,3183779   | 0,89  | 0,755 | 0,658398215 | T | EC | Bzw1          |
| Epas1         | 4,23E-05 | 0,33377684  | 0,878 | 0,568 | 0,670234671 | T | EC | Epas1         |
| Suclg2        | 4,48E-05 | 0,333911754 | 0,451 | 0,232 | 0,710037658 | T | EC | Suclg2        |
| Oaz2          | 4,68E-05 | 0,401967018 | 0,817 | 0,568 | 0,741640702 | T | EC | Oaz2          |
| Ndufv1        | 4,71E-05 | 0,268075251 | 0,622 | 0,378 | 0,746539857 | T | EC | Ndufv1        |
| Ubt1          | 4,84E-05 | 0,354440828 | 0,573 | 0,353 | 0,766882032 | T | EC | Ubt1          |
| Xbp1          | 5,03E-05 | 0,296771666 | 0,927 | 0,78  | 0,796991003 | T | EC | Xbp1          |
| Alad          | 5,05E-05 | 0,294515774 | 0,659 | 0,423 | 0,800905429 | T | EC | Alad          |
| Tmem214       | 5,08E-05 | 0,39158971  | 0,39  | 0,187 | 0,804573443 | T | EC | Tmem214       |
| Mgat1         | 5,11E-05 | 0,334953512 | 0,659 | 0,427 | 0,810709642 | T | EC | Mgat1         |
| 6430562015Rik | 5,30E-05 | 0,339620545 | 0,293 | 0,108 | 0,84008813  | T | EC | 6430562015Rik |
| Dll4          | 5,34E-05 | 0,285420407 | 0,683 | 0,402 | 0,847181089 | T | EC | Dll4          |
| Trim16        | 5,37E-05 | 0,322074482 | 0,415 | 0,191 | 0,851846866 | T | EC | Trim16        |
| Dynl1         | 5,38E-05 | 0,294400978 | 0,939 | 0,822 | 0,853373128 | T | EC | Dynl1         |
| Ddx5          | 5,85E-05 | 0,293823835 | 1     | 0,979 | 0,927663134 | T | EC | Ddx5          |
| Hmgcl         | 5,92E-05 | 0,282738172 | 0,622 | 0,361 | 0,939071675 | T | EC | Hmgcl         |
| Traf7         | 6,09E-05 | 0,276006318 | 0,585 | 0,34  | 0,965595747 | T | EC | Traf7         |
| Pcp4l1        | 6,18E-05 | 0,581360826 | 0,268 | 0,104 | 0,979480306 | T | EC | Pcp4l1        |
| Rab18         | 6,54E-05 | 0,286485197 | 0,768 | 0,498 | 1           | T | EC | Rab18         |
| Slc25a3       | 6,58E-05 | 0,302487391 | 0,341 | 0,145 | 1           | T | EC | Slc25a3       |
| Ext2          | 6,62E-05 | 0,281135896 | 0,634 | 0,398 | 1           | T | EC | Ext2          |
| Msn           | 6,64E-05 | 0,281736628 | 1     | 0,954 | 1           | T | EC | Msn           |
| Pepp1         | 7,09E-05 | 0,320878477 | 0,744 | 0,548 | 1           | T | EC | Pepp1         |
| Rpl8          | 7,11E-05 | 0,259056769 | 0,976 | 0,938 | 1           | T | EC | Rpl8          |
| Frmr8         | 7,24E-05 | 0,328009845 | 0,451 | 0,232 | 1           | T | EC | Frmr8         |
| Fkbp9         | 7,41E-05 | 0,342265849 | 0,573 | 0,336 | 1           | T | EC | Fkbp9         |
| Sh3bp5        | 7,51E-05 | 0,489482809 | 0,585 | 0,39  | 1           | T | EC | Sh3bp5        |
| Capn2         | 7,98E-05 | 0,304617173 | 0,671 | 0,423 | 1           | T | EC | Capn2         |
| Ehd3          | 8,31E-05 | 0,330045418 | 0,561 | 0,311 | 1           | T | EC | Ehd3          |
| Dnajc10       | 8,48E-05 | 0,343679385 | 0,61  | 0,378 | 1           | T | EC | Dnajc10       |
| Ctnnb1        | 8,85E-05 | 0,268110839 | 0,963 | 0,784 | 1           | T | EC | Ctnnb1        |
| Pgm1          | 9,13E-05 | 0,268208715 | 0,646 | 0,378 | 1           | T | EC | Pgm1          |

|          |          |             |       |       |             |   |       |          |
|----------|----------|-------------|-------|-------|-------------|---|-------|----------|
| Tbc1d14  | 5,53E-05 | 0,292106893 | 0,407 | 0,19  | 0,876494101 | 1 | T     | Tbc1d14  |
| Calr     | 5,71E-05 | 0,276697    | 0,963 | 0,872 | 0,905681229 | 1 | T     | Calr     |
| Psm1     | 5,76E-05 | 0,35124452  | 0,852 | 0,707 | 0,912454285 | 1 | T     | Psm1     |
| Lamp2    | 5,91E-05 | 0,362412043 | 0,901 | 0,707 | 0,936613516 | 1 | T     | Lamp2    |
| Neu1     | 6,10E-05 | 0,407221473 | 0,457 | 0,244 | 0,96739424  | 1 | T     | Neu1     |
| Atp2b1   | 6,12E-05 | 0,253957571 | 0,84  | 0,533 | 0,97041529  | 1 | T     | Atp2b1   |
| Cdc42se1 | 6,27E-05 | 0,374070549 | 0,741 | 0,554 | 0,993821394 | 1 | T     | Cdc42se1 |
| Cox5a    | 6,81E-05 | 0,329080342 | 0,914 | 0,752 | 1           | T | Cox5a |          |
| Naga     | 6,85E-05 | 0,327309289 | 0,556 | 0,314 | 1           | T | Naga  |          |
| Lamtor1  | 6,90E-05 | 0,309293295 | 0,728 | 0,504 |             |   |       |          |

|               |             |             |       |       |   |    |               |
|---------------|-------------|-------------|-------|-------|---|----|---------------|
| Wdr75         | 9,14E-05    | 0,364094618 | 0,317 | 0,137 | 1 | TC | Wdr75         |
| Ctnnbip1      | 9,65E-05    | 0,28745625  | 0,707 | 0,494 | 1 | TC | Ctnnbip1      |
| Gdgd5         | 9,90E-05    | 0,384517449 | 0,329 | 0,149 | 1 | TC | Gdgd5         |
| Tmem184b      | 0,000106455 | 0,27783176  | 0,732 | 0,494 | 1 | TC | Tmem184b      |
| Crip2         | 0,000108011 | 0,266330263 | 0,976 | 0,643 | 1 | TC | Crip2         |
| Txnrd1        | 0,000109612 | 0,28595238  | 0,561 | 0,322 | 1 | TC | Txnrd1        |
| Trim27        | 0,000118074 | 0,294048058 | 0,5   | 0,278 | 1 | TC | Trim27        |
| Psm5a         | 0,000118142 | 0,286883142 | 0,878 | 0,689 | 1 | TC | Psm5a         |
| Stxbp1        | 0,000120522 | 0,335510268 | 0,585 | 0,349 | 1 | TC | Stxbp1        |
| Litaf         | 0,000120976 | 0,293293686 | 0,988 | 0,867 | 1 | TC | Litaf         |
| Ublqnl1       | 0,000124769 | 0,333968118 | 0,585 | 0,373 | 1 | TC | Ublqnl1       |
| Cd109         | 0,000127439 | 0,283954725 | 0,622 | 0,373 | 1 | TC | Cd109         |
| Stt3b         | 0,000128806 | 0,261561712 | 0,72  | 0,473 | 1 | TC | Stt3b         |
| Polr2e        | 0,000128939 | 0,285420311 | 0,646 | 0,436 | 1 | TC | Polr2e        |
| Elav1         | 0,000130511 | 0,299205128 | 0,598 | 0,394 | 1 | TC | Elav1         |
| 1810011010Rik | 0,000133277 | 0,265946557 | 0,476 | 0,245 | 1 | TC | 1810011010Rik |
| Pja1          | 0,000136348 | 0,329175304 | 0,317 | 0,137 | 1 | TC | Pja1          |
| Pllp3         | 0,000136515 | 0,332923696 | 0,732 | 0,485 | 1 | TC | Pllp3         |
| Nck1          | 0,000138415 | 0,282859286 | 0,561 | 0,311 | 1 | TC | Nck1          |
| Fzd4          | 0,000146206 | 0,362991121 | 0,671 | 0,444 | 1 | TC | Fzd4          |
| Rfnb          | 0,000147564 | 0,336125119 | 0,476 | 0,261 | 1 | TC | Rfnb          |
| Ppa1          | 0,000153707 | 0,275690519 | 0,366 | 0,17  | 1 | TC | Ppa1          |
| Lrg1          | 0,000153889 | 0,257885189 | 0,927 | 0,647 | 1 | TC | Lrg1          |
| Rwdd4a        | 0,000154522 | 0,274540932 | 0,341 | 0,162 | 1 | TC | Rwdd4a        |
| Sparcl1       | 0,000154762 | 0,313107526 | 0,963 | 0,643 | 1 | TC | Sparcl1       |
| Cdc42ep3      | 0,000158675 | 0,301959481 | 0,646 | 0,39  | 1 | TC | Cdc42ep3      |
| Aprt          | 0,000159936 | 0,251426567 | 0,817 | 0,635 | 1 | TC | Aprt          |
| Rbm18         | 0,000161618 | 0,302331426 | 0,378 | 0,178 | 1 | TC | Rbm18         |
| Dbn1          | 0,000172428 | 0,252854594 | 0,72  | 0,444 | 1 | TC | Dbn1          |
| Agpat4        | 0,000173199 | 0,261453063 | 0,378 | 0,187 | 1 | TC | Agpat4        |
| Ubxn6         | 0,000179976 | 0,251300328 | 0,451 | 0,232 | 1 | TC | Ubxn6         |
| Snai1         | 0,000181607 | 0,280061017 | 0,415 | 0,222 | 1 | TC | Snai1         |
| Metap2        | 0,000187729 | 0,352695527 | 0,829 | 0,656 | 1 | TC | Metap2        |
| Tmco1         | 0,000188264 | 0,301987541 | 0,756 | 0,552 | 1 | TC | Tmco1         |
| Itfg1         | 0,000190034 | 0,376308649 | 0,561 | 0,34  | 1 | TC | Itfg1         |
| Nsmce1        | 0,00019551  | 0,254058078 | 0,622 | 0,387 | 1 | TC | Nsmce1        |
| Hspa5         | 0,000211376 | 0,41896865  | 0,951 | 0,866 | 1 | TC | Hspa5         |
| Pfkap         | 0,00021559  | 0,362174141 | 0,61  | 0,407 | 1 | TC | Pfkap         |
| Nxpe4         | 0,000219882 | 0,276959055 | 0,463 | 0,245 | 1 | TC | Nxpe4         |
| Mapre1        | 0,000226821 | 0,274457116 | 0,829 | 0,71  | 1 | TC | Mapre1        |
| Abcc4         | 0,000227011 | 0,308988813 | 0,61  | 0,369 | 1 | TC | Abcc4         |
| Ran           | 0,000230078 | 0,291680195 | 0,915 | 0,78  | 1 | TC | Ran           |
| Srsf6         | 0,000238514 | 0,278581779 | 0,744 | 0,519 | 1 | TC | Srsf6         |
| Gpi1          | 0,000242156 | 0,271360275 | 0,951 | 0,801 | 1 | TC | Gpi1          |
| Itga3         | 0,000244882 | 0,26163826  | 0,537 | 0,328 | 1 | TC | Itga3         |
| Upf3a         | 0,000248734 | 0,251975961 | 0,427 | 0,216 | 1 | TC | Upf3a         |
| Gnas          | 0,000250287 | 0,262889823 | 0,951 | 0,88  | 1 | TC | Gnas          |
| Yipf1         | 0,000261579 | 0,30254566  | 0,451 | 0,257 | 1 | TC | Yipf1         |
| Rfk           | 0,000262451 | 0,332706681 | 0,622 | 0,461 | 1 | TC | Rfk           |
| Ifi44         | 0,000265546 | 0,278489864 | 0,317 | 0,133 | 1 | TC | Ifi44         |
| H13           | 0,00026574  | 0,257080832 | 0,854 | 0,651 | 1 | TC | H13           |
| Sec62         | 0,00027191  | 0,266170569 | 0,915 | 0,768 | 1 | TC | Sec62         |
| Cdc16         | 0,000271916 | 0,29327058  | 0,488 | 0,278 | 1 | TC | Cdc16         |
| Anapc4        | 0,000275335 | 0,321270525 | 0,488 | 0,299 | 1 | TC | Anapc4        |
| Crem          | 0,000277191 | 0,330736499 | 0,524 | 0,315 | 1 | TC | Crem          |
| Asns          | 0,000318266 | 0,316292573 | 0,28  | 0,116 | 1 | TC | Asns          |
| Plp2          | 0,000320133 | 0,36607576  | 0,793 | 0,568 | 1 | TC | Plp2          |
| Pttg1ip       | 0,00034162  | 0,259971161 | 0,817 | 0,589 | 1 | TC | Pttg1ip       |
| Skp1a         | 0,000347643 | 0,257470084 | 0,915 | 0,797 | 1 | TC | Skp1a         |
| Pkm           | 0,000355565 | 0,280888298 | 1     | 0,975 | 1 | TC | Pkm           |
| Myzap         | 0,000374347 | 0,281879046 | 0,549 | 0,34  | 1 | TC | Myzap         |
| Sec61a1       | 0,000383226 | 0,279587783 | 0,902 | 0,726 | 1 | TC | Sec61a1       |
| Prpsap1       | 0,000383298 | 0,326186094 | 0,549 | 0,34  | 1 | TC | Prpsap1       |
| Ccny          | 0,000384656 | 0,344966544 | 0,488 | 0,303 | 1 | TC | Ccny          |
| Tubb4b        | 0,000390117 | 0,392969098 | 0,695 | 0,523 | 1 | TC | Tubb4b        |
| Snrp3         | 0,000393313 | 0,299802129 | 0,915 | 0,776 | 1 | TC | Snrp3         |
| Csnk1d        | 0,000402223 | 0,387275212 | 0,622 | 0,44  | 1 | TC | Csnk1d        |
| Rcn1          | 0,000412995 | 0,26468262  | 0,402 | 0,22  | 1 | TC | Rcn1          |
| Scarb1        | 0,000435139 | 0,280044498 | 0,659 | 0,456 | 1 | TC | Scarb1        |
| Amotl2        | 0,000477685 | 0,281904587 | 0,268 | 0,112 | 1 | TC | Amotl2        |
| Gja1          | 0,000482923 | 0,327842672 | 0,829 | 0,602 | 1 | TC | Gja1          |
| Pkrar1a       | 0,000504374 | 0,283995033 | 0,963 | 0,876 | 1 | TC | Pkrar1a       |
| Goraspt2      | 0,000509206 | 0,307097865 | 0,78  | 0,61  | 1 | TC | Goraspt2      |
| Tanc1         | 0,000520361 | 0,255253764 | 0,427 | 0,232 | 1 | TC | Tanc1         |
| Mbtps1        | 0,000536695 | 0,322892439 | 0,415 | 0,232 | 1 | TC | Mbtps1        |
| Arhgap27      | 0,000537935 | 0,272723519 | 0,549 | 0,332 | 1 | TC | Arhgap27      |
| Rnf19a        | 0,000544444 | 0,272169822 | 0,415 | 0,228 | 1 | TC | Rnf19a        |
| Cx3c1         | 0,000551739 | 0,291572525 | 0,329 | 0,166 | 1 | TC | Cx3c1         |
| Smad1         | 0,000566753 | 0,37827003  | 0,72  | 0,552 | 1 | TC | Smad1         |
| Fbxo8         | 0,00060431  | 0,324480226 | 0,329 | 0,17  | 1 | TC | Fbxo8         |
| Tmed4         | 0,00060565  | 0,253820347 | 0,598 | 0,365 | 1 | TC | Tmed4         |
| Marcks1       | 0,0006243   | 0,25436132  | 0,902 | 0,722 | 1 | TC | Marcks1       |
| Sft2d2        | 0,00062513  | 0,325920731 | 0,5   | 0,244 | 1 | TC | Sft2d2        |
| Cers5         | 0,000640119 | 0,327542311 | 0,537 | 0,361 | 1 | TC | Cers5         |
| Gpr4          | 0,00064122  | 0,315017128 | 0,768 | 0,552 | 1 | TC | Gpr4          |
| Lmna          | 0,000646946 | 0,262804051 | 0,878 | 0,672 | 1 | TC | Lmna          |
| Abhd4         | 0,000687063 | 0,290878932 | 0,549 | 0,361 | 1 | TC | Abhd4         |
| Sdha          | 0,000709541 | 0,26106231  | 0,659 | 0,49  | 1 | TC | Sdha          |
| Rbbp7         | 0,000738909 | 0,252146651 | 0,756 | 0,531 | 1 | TC | Rbbp7         |
| Cnn2          | 0,00075129  | 0,268671119 | 0,768 | 0,589 | 1 | TC | Cnn2          |
| Dusp6         | 0,00077969  | 0,279404078 | 0,951 | 0,822 | 1 | TC | Dusp6         |
| Lmo2          | 0,000800987 | 0,302769133 | 0,512 | 0,336 | 1 | TC | Lmo2          |
| Mpr1p         | 0,000819301 | 0,271484987 | 0,78  | 0,568 | 1 | TC | Mpr1p         |
| Timp3         | 0,000861046 | 0,34738411  | 0,878 | 0,573 | 1 | TC | Timp3         |
| Tubb2a        | 0,000876079 | 0,306949942 | 0,61  | 0,427 | 1 | TC | Tubb2a        |
| Tns2          | 0,000916991 | 0,258150195 | 0,537 | 0,328 | 1 | TC | Tns2          |
| Kit           | 0,000923471 | 0,2683537   | 0,561 | 0,336 | 1 | TC | Kit           |
| Serbp1        | 0,000925125 | 0,254165999 | 0,902 | 0,817 | 1 | TC | Serbp1        |
| Cltb          | 0,000936438 | 0,256532091 | 0,732 | 0,494 | 1 | TC | Cltb          |
| Galnt18       | 0,001044895 | 0,438748906 | 0,366 | 0,207 | 1 | TC | Galnt18       |
| Tcaf1         | 0,001074184 | 0,269095187 | 0,305 | 0,145 | 1 | TC | Tcaf1         |
| Gpcpd1        | 0,001083271 | 0,33520236  | 0,512 | 0,315 | 1 | TC | Gpcpd1        |
| Ncl           | 0,001088085 | 0,368584325 | 0,902 | 0,822 | 1 | TC | Ncl           |
| Sh3bp4        | 0,00111836  | 0,382226531 | 0,39  | 0,224 | 1 | TC | Sh3bp4        |
| Stk25         | 0,001190218 | 0,321567653 | 0,72  | 0,568 | 1 | TC | Stk25         |
| Eif1ax        | 0,001200785 | 0,290249951 | 0,61  | 0,427 | 1 | TC | Eif1ax        |
| Pfkl          | 0,001225118 | 0,401022308 | 0,634 | 0,456 | 1 | TC | Pfkl          |
| Fkbp8         | 0,001247382 | 0,288484486 | 0,732 | 0,544 | 1 | TC | Fkbp8         |
| Cct7          | 0,001247137 | 0,327248803 | 0,78  | 0,614 | 1 | TC | Cct7          |
| Apold1        | 0,001302701 | 0,292502658 | 0,732 | 0,486 | 1 | TC | Apold1        |
| Nifk          | 0,001303013 | 0,278329846 | 0,451 | 0,288 | 1 | TC | Nifk          |
| Ct8           | 0,001335425 | 0,281821189 | 0,793 | 0,71  | 1 | TC | Ct8           |
| Irgm1         | 0,001378798 | 0,262057005 | 0,524 | 0,324 | 1 | TC | Irgm1         |
| Prnd          | 0,001391351 | 0,400770037 | 0,366 | 0,195 | 1 | TC | Prnd          |
| Lrrc41        | 0,00146201  | 0,262249409 | 0,329 | 0,174 | 1 | TC | Lrrc41        |
| Armc1         | 0,001725458 | 0,295229791 | 0,28  | 0,141 | 1 | TC | Armc1         |
| Txn1          | 0,001738172 | 0,285229951 | 0,573 | 0,427 | 1 | TC | Txn1          |
| Pitp          | 0,001772555 | 0,376540638 | 0,5   | 0,315 | 1 | TC | Pitp          |
| Gde1          | 0,001798469 | 0,26293907  | 0,561 | 0,39  | 1 | TC | Gde1          |
| Cdk4          | 0,001935729 | 0,256885205 | 0,793 | 0,631 | 1 | TC | Cdk4          |
| Myadm         | 0,002015117 | 0,334060649 | 0,817 | 0,751 | 1 | TC | Myadm         |

|               |          |             |       |       |          |   |               |
|---------------|----------|-------------|-------|-------|----------|---|---------------|
| Trp53i11      | 2,17E-13 | 0,866035928 | 0,968 | 0,596 | 3,43E-09 | 2 | Trp53i11      |
| Mcam          | 2,28E-13 | 0,760743123 | 1     | 0,665 | 3,62E-09 | 2 | Mcam          |
| Fscn1         | 2,60E-13 | 0,612866322 | 1     | 0,642 | 4,12E-09 | 2 | Fscn1         |
| Pcdhgc3       | 2,43E-12 | 0,462330778 | 0,46  | 0,096 | 3,86E-08 | 2 | Pcdhgc3       |
| Actg1         | 2,63E-12 | 0,535528158 | 1     | 0,992 | 4,18E-08 | 2 | Actg1         |
| Cd82          | 2,90E-12 | 0,789469018 | 0,746 | 0,338 | 4,60E-08 | 2 | Cd82          |
| Fkbp1a        | 3,20E-12 | 0,611331738 | 1     | 0,912 | 5,07E-08 | 2 | Fkbp1a        |
| Csrp1         | 3,47E-12 | 0,638176967 | 0,873 | 0,492 | 5,49E-08 | 2 | Csrp1         |
| Slc2a1        | 6,73E-12 | 0,657894423 | 0,968 | 0,596 | 1,07E-07 | 2 | Slc2a1        |
| Sh2d5         | 1,00E-11 | 0,3571215   | 0,492 | 0,112 | 1,59E-07 | 2 | Sh2d5         |
| Pkr2d         | 1,08E-11 | 0,541451727 | 0,778 | 0,358 | 1,71E-07 | 2 | Pkr2d         |
| Rhoj          | 1,08E-11 | 0,503120506 | 0,921 | 0,465 | 1,72E-07 | 2 | Rhoj          |
| Mexo1         | 1,48E-11 | 0,594067289 | 0,825 | 0,377 | 2,35E-07 | 2 | Mexo1         |
| Calu          | 1,72E-11 | 0,623906294 | 0,984 | 0,7   | 2,73E-07 | 2 | Calu          |
| Myadm         | 1,77E-11 | 0,762800997 | 0,937 | 0,727 | 2,80E-07 | 2 | Myadm         |
| Pdlim1        | 1,88E-11 | 0,656638195 | 0,984 | 0,638 | 2,98E-07 | 2 | Pdlim1        |
| Adm           | 2,00E-11 | 0,745137838 | 0,683 | 0,422 | 3,18E-07 | 2 | Adm           |
| Kit           | 2,11E-11 | 0,55788509  | 0,778 | 0,3   | 3,34E-07 | 2 | Kit           |
| Ndfip1        | 2,83E-11 | 0,613567865 | 0,968 | 0,704 | 4,48E-07 | 2 | Ndfip1        |
| Itgb1         | 3,50E-11 | 0,624454568 | 1     | 0,927 | 5,55E-07 | 2 | Itgb1         |
| Nid2          | 3,62E-11 | 0,752179391 | 0,952 | 0,546 | 5,74E-07 | 2 | Nid2          |
| Cldn5         | 3,79E-11 | 0,754219163 | 1     | 0,642 | 6,00E-07 | 2 | Cldn5         |
| 6430562015Rik | 4,27E-11 | 0,284861862 | 0,429 | 0,088 | 6,76E-07 | 2 | 6430562015Rik |
| Pde4b         | 1,64E-10 | 0,623284663 | 0,921 | 0,538 | 2,60E-06 | 2 | Pde4b         |
| Clic6         |          |             |       |       |          |   |               |

|          |             |             |       |       |          |   |      |          |
|----------|-------------|-------------|-------|-------|----------|---|------|----------|
| Ranbp3   | 0,002057836 | 0,266840045 | 0,415 | 0,253 | 1        | T | EC   | Ranbp3   |
| Hadhb    | 0,002066665 | 0,261336463 | 0,585 | 0,415 | 1        | T | EC   | Hadhb    |
| Ddx58    | 0,002177872 | 0,332001328 | 0,415 | 0,266 | 1        | T | EC   | Ddx58    |
| Smu1     | 0,002295399 | 0,30591275  | 0,549 | 0,378 | 1        | T | EC   | Smu1     |
| Mars     | 0,002371589 | 0,30893894  | 0,341 | 0,195 | 1        | T | EC   | Mars     |
| Apba3    | 0,002381846 | 0,260663855 | 0,317 | 0,17  | 1        | T | EC   | Apba3    |
| Bsg      | 0,002438888 | 0,294328032 | 0,963 | 0,917 | 1        | T | EC   | Bsg      |
| Anapc5   | 0,002486652 | 0,260290973 | 0,768 | 0,651 | 1        | T | EC   | Anapc5   |
| Palid1   | 0,002494374 | 0,330978552 | 0,646 | 0,506 | 1        | T | EC   | Palid1   |
| Zc3h15   | 0,002524294 | 0,371452442 | 0,537 | 0,386 | 1        | T | EC   | Zc3h15   |
| Glxr3    | 0,002812966 | 0,272334563 | 0,695 | 0,519 | 1        | T | EC   | Glxr3    |
| Eif1a    | 0,002841848 | 0,279361232 | 0,585 | 0,423 | 1        | T | EC   | Eif1a    |
| Chtop    | 0,003064956 | 0,257093086 | 0,561 | 0,398 | 1        | T | EC   | Chtop    |
| Rhot1    | 0,003066525 | 0,27545181  | 0,354 | 0,199 | 1        | T | EC   | Rhot1    |
| Il11ra1  | 0,003100966 | 0,25708298  | 0,366 | 0,203 | 1        | T | EC   | Il11ra1  |
| My12b    | 0,003122161 | 0,252869909 | 0,976 | 0,917 | 1        | T | EC   | My12b    |
| Angpt4   | 0,003336935 | 0,287971047 | 0,341 | 0,178 | 1        | T | EC   | Angpt4   |
| Ddx39    | 0,003383477 | 0,265711517 | 0,683 | 0,535 | 1        | T | EC   | Ddx39    |
| Eif3l    | 0,003538695 | 0,251386695 | 0,695 | 0,548 | 1        | T | EC   | Eif3l    |
| Ssb      | 0,00382179  | 0,294950634 | 0,793 | 0,685 | 1        | T | EC   | Ssb      |
| Maged2   | 0,003845653 | 0,296932141 | 0,39  | 0,249 | 1        | T | EC   | Maged2   |
| Dgcr2    | 0,00422467  | 0,304362548 | 0,524 | 0,361 | 1        | T | EC   | Dgcr2    |
| Smarcb1  | 0,004267479 | 0,289042761 | 0,488 | 0,361 | 1        | T | EC   | Smarcb1  |
| Rcn2     | 0,004622575 | 0,311327985 | 0,634 | 0,502 | 1        | T | EC   | Rcn2     |
| Ssr3     | 0,004625689 | 0,280728694 | 0,89  | 0,755 | 1        | T | EC   | Ssr3     |
| Vcp      | 0,004629361 | 0,282905943 | 0,805 | 0,755 | 1        | T | EC   | Vcp      |
| Zfp68    | 0,00472084  | 0,266665457 | 0,305 | 0,162 | 1        | T | EC   | Zfp68    |
| Wdr77    | 0,004817554 | 0,32306519  | 0,341 | 0,203 | 1        | T | EC   | Wdr77    |
| Mat2a    | 0,004897053 | 0,27039299  | 0,646 | 0,494 | 1        | T | EC   | Mat2a    |
| Psm2d    | 0,00490883  | 0,270898678 | 0,695 | 0,589 | 1        | T | EC   | Psm2d    |
| Ube3c    | 0,005234808 | 0,269117021 | 0,366 | 0,216 | 1        | T | EC   | Ube3c    |
| Api5     | 0,00588477  | 0,270498292 | 0,634 | 0,506 | 1        | T | EC   | Api5     |
| Prpc     | 0,006288544 | 0,332971686 | 0,756 | 0,685 | 1        | T | EC   | Prpc     |
| Usp4     | 0,006851996 | 0,295390248 | 0,512 | 0,369 | 1        | T | EC   | Usp4     |
| Fbxl5    | 0,007021882 | 0,354376836 | 0,463 | 0,344 | 1        | T | EC   | Fbxl5    |
| Ctso     | 0,007105881 | 0,253758368 | 0,329 | 0,191 | 1        | T | EC   | Ctso     |
| Ctgf     | 0,007373529 | 0,519423125 | 0,415 | 0,257 | 1        | T | EC   | Ctgf     |
| Slc46a3  | 0,00778888  | 0,289482029 | 0,305 | 0,178 | 1        | T | EC   | Slc46a3  |
| Ehd4     | 0,008048354 | 0,272906161 | 0,89  | 0,739 | 1        | T | EC   | Ehd4     |
| Mmp14    | 0,008123814 | 0,280902257 | 0,915 | 0,846 | 1        | T | EC   | Mmp14    |
| Odc1     | 0,008316062 | 0,300607112 | 0,585 | 0,448 | 1        | T | EC   | Odc1     |
| Rnf213   | 0,008896741 | 0,327192935 | 0,561 | 0,419 | 1        | T | EC   | Rnf213   |
| Azin1    | 0,009195984 | 0,468449122 | 0,439 | 0,282 | 1        | T | EC   | Azin1    |
| mt-Rnr1  | 2,29E-26    | 0,81308994  | 1     | 1     | 3,63E-22 | T | CLEC | mt-Rnr1  |
| S1pr1    | 3,95E-24    | 0,933278024 | 0,988 | 0,552 | 6,26E-20 | T | EC   | S1pr1    |
| Gng11    | 5,71E-24    | 0,963026124 | 0,975 | 0,528 | 9,06E-20 | T | CLEC | Gng11    |
| Adgrf5   | 8,71E-23    | 1,05222851  | 0,925 | 0,442 | 1,38E-18 | T | CLEC | Adgrf5   |
| Plvap    | 1,54E-22    | 1,093123712 | 0,944 | 0,436 | 2,45E-18 | T | CLEC | Plvap    |
| Malat1   | 5,93E-22    | 1,047396874 | 0,994 | 1     | 9,41E-18 | T | CLEC | Malat1   |
| Col4a2   | 1,25E-21    | 0,870300769 | 1     | 0,54  | 1,99E-17 | T | CLEC | Col4a2   |
| Cdh13    | 2,97E-21    | 1,03353919  | 0,906 | 0,393 | 4,70E-17 | T | CLEC | Cdh13    |
| Col4a1   | 1,32E-19    | 0,812560223 | 0,994 | 0,564 | 2,10E-15 | T | CLEC | Col4a1   |
| Gm37376  | 1,54E-19    | 0,999218131 | 0,988 | 0,988 | 2,44E-15 | T | CLEC | Gm37376  |
| Flt4     | 2,71E-19    | 0,859119683 | 0,844 | 0,454 | 4,29E-15 | T | CLEC | Flt4     |
| Hspg2    | 4,22E-19    | 0,781529612 | 0,956 | 0,46  | 6,69E-15 | T | CLEC | Hspg2    |
| Cdh5     | 1,15E-18    | 0,683474182 | 0,975 | 0,497 | 1,83E-14 | T | CLEC | Cdh5     |
| Sema3f   | 2,55E-18    | 0,655028031 | 0,862 | 0,38  | 4,04E-14 | T | CLEC | Sema3f   |
| Sptbn1   | 3,65E-18    | 0,810687416 | 0,981 | 0,632 | 5,78E-14 | T | CLEC | Sptbn1   |
| Ets1     | 5,77E-18    | 0,80075104  | 0,944 | 0,528 | 9,14E-14 | T | CLEC | Ets1     |
| Gp1hbp1  | 1,04E-17    | 1,153867816 | 0,756 | 0,307 | 1,65E-13 | T | CLEC | Gp1hbp1  |
| Lrrcc8   | 4,74E-17    | 0,845816575 | 0,912 | 0,663 | 7,51E-13 | T | CLEC | Lrrcc8   |
| Pecam1   | 7,84E-17    | 0,725161956 | 0,981 | 0,564 | 1,42E-12 | T | CLEC | Pecam1   |
| AY036118 | 2,83E-16    | 0,472079981 | 1     | 1     | 4,49E-12 | T | CLEC | AY036118 |
| Ahnak    | 8,17E-16    | 0,728874009 | 0,869 | 0,521 | 1,29E-11 | T | CLEC | Ahnak    |
| Heg1     | 8,58E-16    | 0,725091534 | 0,912 | 0,472 | 1,36E-11 | T | CLEC | Heg1     |
| Ece1     | 1,26E-15    | 0,597328385 | 1     | 0,54  | 2,00E-11 | T | CLEC | Ece1     |
| Sparc11  | 2,90E-15    | 0,710229414 | 0,944 | 0,509 | 4,60E-11 | T | CLEC | Sparc11  |
| Lama4    | 3,56E-15    | 0,710526894 | 0,856 | 0,411 | 5,64E-11 | T | CLEC | Lama4    |
| Cd93     | 3,80E-15    | 0,6694057   | 0,994 | 0,865 | 6,03E-11 | T | CLEC | Cd93     |
| Lrg1     | 3,92E-15    | 0,776991566 | 0,956 | 0,485 | 6,21E-11 | T | CLEC | Lrg1     |
| Insr     | 6,46E-15    | 0,73003272  | 0,806 | 0,423 | 1,02E-10 | T | CLEC | Insr     |
| Kdr      | 6,67E-15    | 0,696572223 | 0,894 | 0,436 | 1,06E-10 | T | CLEC | Kdr      |
| Emcn     | 9,74E-15    | 0,749146708 | 0,938 | 0,509 | 1,54E-10 | T | CLEC | Emcn     |
| Tcf4     | 1,07E-14    | 0,648588086 | 0,988 | 0,779 | 1,70E-10 | T | CLEC | Tcf4     |
| Crip21   | 2,00E-14    | 0,648529373 | 0,925 | 0,534 | 3,18E-10 | T | CLEC | Crip21   |
| Tpm41    | 7,17E-14    | 0,574379727 | 0,988 | 0,865 | 1,14E-09 | T | CLEC | Tpm41    |
| Col18a1  | 9,33E-14    | 0,749285745 | 0,794 | 0,399 | 1,48E-09 | T | CLEC | Col18a1  |
| Sept2    | 1,07E-13    | 0,686184369 | 0,969 | 0,951 | 1,69E-09 | T | CLEC | Sept2    |
| Lamc1    | 1,11E-13    | 0,686985287 | 0,888 | 0,485 | 1,76E-09 | T | CLEC | Lamc1    |
| Flt11    | 1,11E-13    | 0,594394715 | 0,956 | 0,503 | 1,76E-09 | T | CLEC | Flt11    |
| Cyrr1    | 1,12E-13    | 0,724119727 | 0,825 | 0,442 | 1,78E-09 | T | CLEC | Cyrr1    |
| Rbp1     | 1,29E-13    | 0,621627668 | 0,85  | 0,405 | 2,04E-09 | T | CLEC | Rbp1     |
| Eng1     | 1,38E-13    | 0,62451948  | 0,981 | 0,632 | 2,18E-09 | T | CLEC | Eng1     |
| Tmsb101  | 1,44E-13    | 0,509184651 | 1     | 0,951 | 2,28E-09 | T | CLEC | Tmsb101  |
| Timpp1   | 1,52E-13    | 0,559223638 | 0,856 | 0,448 | 2,40E-09 | T | CLEC | Timpp1   |
| Podxl    | 1,60E-13    | 0,504959531 | 0,819 | 0,374 | 2,54E-09 | T | CLEC | Podxl    |
| Lamb1    | 1,92E-13    | 0,701250924 | 0,869 | 0,46  | 3,04E-09 | T | CLEC | Lamb1    |
| Sparc1   | 3,00E-13    | 0,666475156 | 1     | 0,589 | 4,76E-09 | T | CLEC | Sparc1   |
| Aqp1     | 3,93E-13    | 0,818001907 | 0,344 | 0,031 | 6,23E-09 | T | CLEC | Aqp1     |
| Serpinh1 | 4,80E-13    | 0,461652542 | 0,938 | 0,503 | 7,61E-09 | T | CLEC | Serpinh1 |
| Gimap61  | 5,70E-13    | 0,642261641 | 0,919 | 0,509 | 9,03E-09 | T | CLEC | Gimap61  |
| Nid1     | 7,80E-13    | 0,621257242 | 0,888 | 0,491 | 1,24E-08 | T | CLEC | Nid1     |
| Fabp4    | 8,58E-13    | 0,88242415  | 0,344 | 0,037 | 1,36E-08 | T | CLEC | Fabp4    |
| Pam      | 1,31E-12    | 0,379525636 | 0,95  | 0,681 | 2,07E-08 | T | CLEC | Pam      |
| Abcc9    | 1,77E-12    | 0,864876323 | 0,606 | 0,227 | 2,80E-08 | T | CLEC | Abcc9    |
| Ppic1    | 1,94E-12    | 0,561824013 | 0,938 | 0,509 | 3,07E-08 | T | CLEC | Ppic1    |
| Ednrb    | 1,96E-12    | 0,883897344 | 0,644 | 0,264 | 3,11E-08 | T | CLEC | Ednrb    |
| Gja11    | 2,17E-12    | 0,580685533 | 0,869 | 0,454 | 3,43E-08 | T | CLEC | Gja11    |
| Cald1    | 2,25E-12    | 0,550439359 | 0,844 | 0,472 | 3,56E-08 | T | CLEC | Cald1    |
| Olflml2a | 2,55E-12    | 0,715108592 | 0,519 | 0,172 | 4,05E-08 | T | CLEC | Olflml2a |
| Ywhaz    | 2,64E-12    | 0,487502115 | 1     | 0,988 | 4,18E-08 | T | CLEC | Ywhaz    |
| Fscn1    | 2,96E-12    | 0,606873093 | 0,912 | 0,515 | 4,70E-08 | T | CLEC | Fscn1    |
| Jup      | 3,82E-12    | 0,66745007  | 0,9   | 0,571 | 6,06E-08 | T | CLEC | Jup      |
| Pllpp1   | 3,99E-12    | 0,744118187 | 0,812 | 0,466 | 6,33E-08 | T | CLEC | Pllpp1   |
| Grb10    | 4,09E-12    | 0,660519572 | 0,625 | 0,27  | 6,48E-08 | T | CLEC | Grb10    |
| Ptgr1    | 4,24E-12    | 1,063582916 | 0,7   | 0,393 | 6,72E-08 | T | CLEC | Ptgr1    |
| Fstl1    | 5,38E-12    | 0,621109317 | 0,725 | 0,344 | 8,53E-08 | T | CLEC | Fstl1    |
| Ramp3    | 6,18E-12    | 0,791127318 | 0,494 | 0,141 | 9,80E-08 | T | CLEC | Ramp3    |
| Zeb1     | 6,23E-12    | 0,658743109 | 0,662 | 0,344 | 9,88E-08 | T | CLEC | Zeb1     |
| Ldb2     | 8,08E-12    | 0,528778092 | 0,819 | 0,436 | 1,28E-07 | T | CLEC | Ldb2     |
| Cd2001   | 1,01E-11    | 0,503412191 | 1     | 0,509 | 1,61E-07 | T | CLEC | Cd2001   |
| Mcam1    | 1,04E-11    | 0,492840524 | 0,944 | 0,521 | 1,65E-07 | T | CLEC | Mcam1    |
| Ptprb    | 1,08E-11    | 0,614548448 | 0,856 | 0,466 | 1,71E-07 | T | CLEC | Ptprb    |
| Slico2a1 | 1,34E-11    | 0,529877842 | 0,744 | 0,356 | 2,12E-07 | T | CLEC | Slico2a1 |
| Ppfbp1   | 2,03E-11    | 0,557509781 | 0,825 | 0,509 | 3,21E-07 | T | CLEC | Ppfbp1   |
| Mmrm2    | 2,41E-11    | 0,64425187  | 0,794 | 0,417 | 3,83E-07 | T | CLEC | Mmrm2    |
| Anxa21   | 2,72E-11    | 0,508225134 | 0,975 | 0,767 | 4,31E-07 | T | CLEC | Anxa21   |
| Eccr1    | 3,26E-11    | 0,546572318 | 0,956 | 0,509 | 5,17E-07 | T | CLEC | Eccr1    |
| Nfib     | 3,29E-11    | 0,588688742 | 0,794 | 0,454 | 5,21E-07 | T | CLEC | Nfib     |
| Nos3     | 3,48E-11    | 0,465241915 | 0,8   | 0,393 | 5,51E-07 | T | CLEC | Nos3     |
| Plec     | 3,83E-11    | 0,542649557 | 0,919 | 0,644 | 6,08E-07 | T | CLEC | Plec     |

|          |          |             |       |       |             |   |          |
|----------|----------|-------------|-------|-------|-------------|---|----------|
| Npdc1    | 8,18E-07 | 0,327937011 | 0,81  | 0,431 | 0,012968633 | 2 | Npdc1    |
| Fam129a  | 8,18E-07 | 0,317329168 | 0,46  | 0,169 | 0,012973754 | 2 | Fam129a  |
| H2-Q7    | 9,10E-07 | 0,528451652 | 0,873 | 0,604 | 0,0144491   | 2 | H2-Q7    |
| Fam43a   | 9,45E-07 | 0,472280008 | 0,683 | 0,377 | 0,014975638 | 2 | Fam43a   |
| Rela     | 1,02E-06 | 0,377519284 | 0,746 | 0,462 | 0,016223463 | 2 | Rela     |
| Pli31    | 1,15E-06 | 0,385414762 | 0,841 | 0,527 | 0,018269637 | 2 | Pli31    |
| Pdlim7   | 1,16E-06 | 0,337906354 | 0,968 | 0,669 | 0,018421085 | 2 | Pdlim7   |
| Tspan18  | 1,17E-06 | 0,305436177 | 0,857 | 0,485 | 0,018478324 | 2 | Tspan18  |
| Cdc42ep4 | 1,18E-06 | 0,36475443  | 0,556 | 0,25  | 0,018754019 | 2 | Cdc42ep4 |
| Cdc42ep1 | 1,21E-06 | 0,371350763 | 0,73  | 0,392 | 0,019139329 | 2 | Cdc42ep1 |
| Ackr3    | 1,24E-06 | 0,399265824 | 0,714 | 0,35  | 0,01958391  | 2 | Ackr3    |
| Chst1    | 1,35E-06 | 0,365323548 | 0,524 | 0,231 | 0,021448848 | 2 | Chst1    |
| Angpt2   | 1,37E-06 | 0,626271416 | 0,508 | 0,212 | 0,021769401 | 2 | Angpt2   |
| Aldoa    | 1,57E-06 | 0,3         |       |       |             |   |          |

|           |          |             |       |       |             |        |           |
|-----------|----------|-------------|-------|-------|-------------|--------|-----------|
| Pkxnd1    | 4,39E-11 | 0.473421831 | 0,956 | 0,706 | 6,96E-07    | T_CLEC | Pkxnd1    |
| Efna11    | 5,81E-11 | 0.567177011 | 0,844 | 0,454 | 9,21E-07    | T_CLEC | Efna1     |
| Epas11    | 8,38E-11 | 0.488914665 | 0,844 | 0,454 | 1,33E-06    | T_CLEC | Epas1     |
| F11r      | 8,62E-11 | 0.494761613 | 0,944 | 0,822 | 1,37E-06    | T_CLEC | F11r      |
| Tspan9    | 8,88E-11 | 0.52308318  | 0,744 | 0,387 | 1,41E-06    | T_CLEC | Tspan9    |
| Ctnna1    | 9,21E-11 | 0.573735056 | 0,919 | 0,687 | 1,46E-06    | T_CLEC | Ctnna1    |
| Cnn31     | 9,57E-11 | 0.59158725  | 0,944 | 0,534 | 1,52E-06    | T_CLEC | Cnn3      |
| Ctia2a1   | 1,17E-10 | 0.520003758 | 0,969 | 0,534 | 1,86E-06    | T_CLEC | Ctia2a1   |
| Calcr1    | 1,25E-10 | 0.412099698 | 0,731 | 0,356 | 1,98E-06    | T_CLEC | Calcr1    |
| Kcnj8     | 1,66E-10 | 1,028139413 | 0,35  | 0,067 | 2,63E-06    | T_CLEC | Kcnj8     |
| Piezo2    | 1,86E-10 | 0.60540364  | 0,688 | 0,362 | 2,94E-06    | T_CLEC | Piezo2    |
| Myct1     | 2,05E-10 | 0.592769189 | 0,65  | 0,319 | 3,25E-06    | T_CLEC | Myct1     |
| Shank3    | 2,09E-10 | 0.25947851  | 0,569 | 0,264 | 3,31E-06    | T_CLEC | Shank3    |
| Kcnc3     | 2,15E-10 | 0.829505865 | 0,638 | 0,325 | 3,41E-06    | T_CLEC | Kcnc3     |
| S100a61   | 2,77E-10 | 0.415508649 | 0,938 | 0,712 | 4,39E-06    | T_CLEC | S100a61   |
| Prkcdp1   | 2,81E-10 | 0.455123312 | 0,95  | 0,503 | 4,45E-06    | T_CLEC | Prkcdp1   |
| Tshz2     | 3,03E-10 | 0.519575791 | 0,612 | 0,282 | 4,81E-06    | T_CLEC | Tshz2     |
| Tie11     | 3,05E-10 | 0.455866077 | 0,844 | 0,436 | 4,83E-06    | T_CLEC | Tie11     |
| Emp1      | 3,61E-10 | 0.556113899 | 0,888 | 0,62  | 5,71E-06    | T_CLEC | Emp1      |
| Gnb1      | 3,72E-10 | 0.533255432 | 1     | 0,994 | 5,90E-06    | T_CLEC | Gnb1      |
| Ptfr      | 5,62E-10 | 0.475468692 | 0,9   | 0,509 | 8,91E-06    | T_CLEC | Ptfr      |
| Sptan1    | 5,83E-10 | 0.64124894  | 0,825 | 0,656 | 9,24E-06    | T_CLEC | Sptan1    |
| Cdc42bpa  | 5,83E-10 | 0.55402809  | 0,512 | 0,202 | 9,25E-06    | T_CLEC | Cdc42bpa  |
| Dock9     | 9,42E-10 | 0.421594028 | 0,781 | 0,411 | 1,49E-05    | T_CLEC | Dock9     |
| Akap2     | 9,84E-10 | 0.363527232 | 0,562 | 0,233 | 1,56E-05    | T_CLEC | Akap2     |
| Cd9       | 1,08E-09 | 0.529739087 | 0,925 | 0,804 | 1,72E-05    | T_CLEC | Cd9       |
| Rapgef5   | 1,11E-09 | 0.563746171 | 0,744 | 0,423 | 1,76E-05    | T_CLEC | Rapgef5   |
| Tes       | 1,16E-09 | 0.410223125 | 0,875 | 0,571 | 1,83E-05    | T_CLEC | Tes       |
| Slc9a3r21 | 1,36E-09 | 0.538724534 | 0,819 | 0,436 | 2,16E-05    | T_CLEC | Slc9a3r21 |
| Ehd2      | 1,44E-09 | 0.42267526  | 0,706 | 0,368 | 2,28E-05    | T_CLEC | Ehd2      |
| Inhbb     | 1,66E-09 | 0.767264461 | 0,606 | 0,313 | 2,64E-05    | T_CLEC | Inhbb     |
| Nav1      | 1,73E-09 | 0.521633644 | 0,612 | 0,307 | 2,74E-05    | T_CLEC | Nav1      |
| Ptprg     | 1,80E-09 | 0.510299193 | 0,569 | 0,245 | 2,86E-05    | T_CLEC | Ptprg     |
| Msn       | 1,82E-09 | 0.385111029 | 0,975 | 0,957 | 2,89E-05    | T_CLEC | Msn       |
| Wwtr1     | 1,88E-09 | 0.586644888 | 0,669 | 0,374 | 2,99E-05    | T_CLEC | Wwtr1     |
| Adamts4   | 1,94E-09 | 0.448218883 | 0,612 | 0,27  | 3,08E-05    | T_CLEC | Adamts4   |
| Vwf1      | 2,55E-09 | 0.50608674  | 0,881 | 0,503 | 4,04E-05    | T_CLEC | Vwf1      |
| Trp53111  | 2,95E-09 | 0.372028125 | 0,894 | 0,448 | 4,67E-05    | T_CLEC | Trp53111  |
| Nfia      | 3,07E-09 | 0.39731878  | 0,862 | 0,601 | 4,86E-05    | T_CLEC | Nfia      |
| Lars2     | 3,42E-09 | 0.332625188 | 1     | 1     | 5,42E-05    | T_CLEC | Lars2     |
| Creb3l2   | 3,42E-09 | 0.560611454 | 0,731 | 0,411 | 5,43E-05    | T_CLEC | Creb3l2   |
| Amot11    | 3,55E-09 | 0.529617208 | 0,681 | 0,374 | 5,63E-05    | T_CLEC | Amot11    |
| Mast4     | 3,57E-09 | 0.471999109 | 0,706 | 0,38  | 5,67E-05    | T_CLEC | Mast4     |
| Rgcc      | 3,70E-09 | 0.656720591 | 0,625 | 0,313 | 5,87E-05    | T_CLEC | Rgcc      |
| Cd341     | 4,02E-09 | 0.467712368 | 0,975 | 0,521 | 6,37E-05    | T_CLEC | Cd341     |
| Adam10    | 4,33E-09 | 0.53684086  | 0,95  | 0,896 | 6,86E-05    | T_CLEC | Adam10    |
| S100a161  | 4,63E-09 | 0.419885059 | 0,888 | 0,472 | 7,34E-05    | T_CLEC | S100a161  |
| Entpd1    | 5,06E-09 | 0.778588113 | 0,894 | 0,804 | 8,01E-05    | T_CLEC | Entpd1    |
| Hifa1     | 5,38E-09 | 0.606392857 | 0,869 | 0,748 | 8,53E-05    | T_CLEC | Hifa1     |
| Adgrl4    | 5,56E-09 | 0.370640001 | 0,931 | 0,491 | 8,82E-05    | T_CLEC | Adgrl4    |
| Lpp       | 6,35E-09 | 0.488106425 | 0,781 | 0,546 | 0,000100717 | T_CLEC | Lpp       |
| Sept11    | 6,67E-09 | 0.506017925 | 0,706 | 0,423 | 0,000105675 | T_CLEC | Sept11    |
| Limch1    | 6,92E-09 | 0.434889136 | 0,45  | 0,153 | 0,000109704 | T_CLEC | Limch1    |
| Nedd41    | 7,75E-09 | 0.436678927 | 0,9   | 0,54  | 0,000122917 | T_CLEC | Nedd41    |
| Sox71     | 8,72E-09 | 0.372202396 | 0,769 | 0,387 | 0,000138223 | T_CLEC | Sox71     |
| Prss231   | 1,03E-08 | 0.479028051 | 0,794 | 0,448 | 0,000164046 | T_CLEC | Prss231   |
| mt-Rnr2   | 1,26E-08 | 0.324471857 | 1     | 1     | 0,000200229 | T_CLEC | mt-Rnr2   |
| Nid21     | 1,30E-08 | 0.411046429 | 0,794 | 0,46  | 0,0002058   | T_CLEC | Nid21     |
| Prex2     | 1,38E-08 | 0.447512014 | 0,888 | 0,767 | 0,000218643 | T_CLEC | Prex2     |
| Dusp3     | 1,76E-08 | 0.431520966 | 0,944 | 0,736 | 0,000278843 | T_CLEC | Dusp3     |
| Myo10     | 1,78E-08 | 0.474682462 | 0,625 | 0,313 | 0,000282687 | T_CLEC | Myo10     |
| Plod1     | 2,19E-08 | 0.524606928 | 0,912 | 0,84  | 0,000347438 | T_CLEC | Plod1     |
| Tspan18   | 2,66E-08 | 0.395971183 | 0,725 | 0,393 | 0,000421922 | T_CLEC | Tspan18   |
| Pxdn      | 2,87E-08 | 0.630546431 | 0,662 | 0,405 | 0,000454231 | T_CLEC | Pxdn      |
| Lybc11    | 3,09E-08 | 0.439665396 | 0,825 | 0,466 | 0,000490411 | T_CLEC | Lybc11    |
| Pde2a     | 3,53E-08 | 0.666786236 | 0,55  | 0,264 | 0,000560328 | T_CLEC | Pde2a     |
| Egfl71    | 3,82E-08 | 0.381312833 | 0,994 | 0,521 | 0,000605749 | T_CLEC | Egfl71    |
| Tacr1     | 4,35E-08 | 0.485585682 | 0,362 | 0,11  | 0,000690148 | T_CLEC | Tacr1     |
| Ptprm     | 4,37E-08 | 0.64089967  | 0,631 | 0,374 | 0,000693188 | T_CLEC | Ptprm     |
| Aplp2     | 4,41E-08 | 0.480608179 | 0,931 | 0,724 | 0,000699754 | T_CLEC | Aplp2     |
| Dchs1     | 4,56E-08 | 0.49473353  | 0,538 | 0,27  | 0,000722452 | T_CLEC | Dchs1     |
| Sema6d1   | 4,87E-08 | 0.479445226 | 0,781 | 0,472 | 0,000771421 | T_CLEC | Sema6d1   |
| Nckap1    | 5,17E-08 | 0.455293514 | 0,6   | 0,301 | 0,000820011 | T_CLEC | Nckap1    |
| Apold1    | 5,21E-08 | 0.461193513 | 0,712 | 0,405 | 0,000826382 | T_CLEC | Apold1    |
| Tram2     | 5,38E-08 | 0.489531164 | 0,756 | 0,503 | 0,000852528 | T_CLEC | Tram2     |
| Tmem2041  | 5,48E-08 | 0.483931678 | 0,712 | 0,393 | 0,000868976 | T_CLEC | Tmem2041  |
| Lmcd1     | 7,07E-08 | 0.416878844 | 0,369 | 0,11  | 0,001120249 | T_CLEC | Lmcd1     |
| Tnfrsf22  | 7,11E-08 | 0.311811701 | 0,569 | 0,313 | 0,00112757  | T_CLEC | Tnfrsf22  |
| Ipo11     | 7,74E-08 | 0.519142216 | 0,706 | 0,417 | 0,001226855 | T_CLEC | Ipo11     |
| Pllp31    | 8,24E-08 | 0.440212384 | 0,712 | 0,387 | 0,001306401 | T_CLEC | Pllp31    |
| Adamts11  | 9,00E-08 | 0.318124149 | 0,744 | 0,399 | 0,001426296 | T_CLEC | Adamts11  |
| Nrp2      | 9,09E-08 | 0.411429453 | 0,644 | 0,368 | 0,001441453 | T_CLEC | Nrp2      |
| Aplnr1    | 9,24E-08 | 0.52895075  | 0,725 | 0,405 | 0,001464347 | T_CLEC | Aplnr1    |
| Fermt2    | 1,00E-07 | 0.393614194 | 0,775 | 0,436 | 0,001589506 | T_CLEC | Fermt2    |
| Exoc3l2   | 1,05E-07 | 0.435076218 | 0,419 | 0,16  | 0,001664559 | T_CLEC | Exoc3l2   |
| Endod1    | 1,17E-07 | 0.636327292 | 0,675 | 0,448 | 0,001858669 | T_CLEC | Endod1    |
| Nes       | 1,42E-07 | 0.406529788 | 0,494 | 0,227 | 0,002253319 | T_CLEC | Nes       |
| Wscd1     | 1,46E-07 | 0.390682328 | 0,5   | 0,209 | 0,002307544 | T_CLEC | Wscd1     |
| Plxna2    | 1,65E-07 | 0.38691773  | 0,538 | 0,252 | 0,002608806 | T_CLEC | Plxna2    |
| Rhoc1     | 1,66E-07 | 0.323659819 | 0,9   | 0,564 | 0,00263729  | T_CLEC | Rhoc1     |
| Upp11     | 1,70E-07 | 0.377127429 | 0,8   | 0,46  | 0,002690943 | T_CLEC | Upp11     |
| Tuba1a1   | 1,84E-07 | 0.439805885 | 0,838 | 0,607 | 0,002914621 | T_CLEC | Tuba1a1   |
| Pls3      | 1,90E-07 | 0.555165381 | 0,731 | 0,448 | 0,003014822 | T_CLEC | Pls3      |
| Atp1b3    | 2,14E-07 | 0.414615259 | 0,95  | 0,883 | 0,00338723  | T_CLEC | Atp1b3    |
| Pcdh17    | 2,15E-07 | 0.323101218 | 0,544 | 0,27  | 0,003402902 | T_CLEC | Pcdh17    |
| Igfbp31   | 2,22E-07 | 0.254115632 | 0,988 | 0,577 | 0,003519978 | T_CLEC | Igfbp31   |
| Cd300lg   | 2,23E-07 | 0.705789112 | 0,4   | 0,153 | 0,003532496 | T_CLEC | Cd300lg   |
| Tmem2     | 2,38E-07 | 0.350574728 | 0,675 | 0,393 | 0,003768197 | T_CLEC | Tmem2     |
| Ext1      | 2,68E-07 | 0.487593642 | 0,606 | 0,362 | 0,004253865 | T_CLEC | Ext1      |
| Tjp1      | 2,75E-07 | 0.462888529 | 0,625 | 0,356 | 0,00435334  | T_CLEC | Tjp1      |
| Dbn11     | 3,15E-07 | 0.395763082 | 0,662 | 0,368 | 0,00498851  | T_CLEC | Dbn11     |
| Robo1     | 3,25E-07 | 0.322589725 | 0,331 | 0,104 | 0,005149752 | T_CLEC | Robo1     |
| Rasip11   | 3,29E-07 | 0.355251192 | 0,762 | 0,436 | 0,005220946 | T_CLEC | Rasip11   |
| Lama5     | 3,56E-07 | 0.605059017 | 0,55  | 0,282 | 0,005636044 | T_CLEC | Lama5     |
| Tmem881   | 3,57E-07 | 0.281579671 | 0,9   | 0,497 | 0,005664112 | T_CLEC | Tmem881   |
| Ackr3     | 3,87E-07 | 0.493080336 | 0,556 | 0,288 | 0,006129477 | T_CLEC | Ackr3     |
| Apbb2     | 3,91E-07 | 0.447588406 | 0,744 | 0,454 | 0,006202247 | T_CLEC | Apbb2     |
| Crebbp    | 3,92E-07 | 0.38415043  | 0,738 | 0,509 | 0,006215271 | T_CLEC | Crebbp    |
| Gm4202    | 3,96E-07 | 0.337360389 | 0,888 | 0,822 | 0,006282333 | T_CLEC | Gm4202    |
| Nudt4     | 4,29E-07 | 0.576522187 | 0,519 | 0,307 | 0,00680542  | T_CLEC | Nudt4     |
| Sorbs31   | 4,44E-07 | 0.36852575  | 0,819 | 0,558 | 0,007043186 | T_CLEC | Sorbs31   |
| Sept10    | 4,61E-07 | 0.2848015   | 0,794 | 0,595 | 0,007307698 | T_CLEC | Sept10    |
| Elk3      | 4,73E-07 | 0.398070525 | 0,912 | 0,73  | 0,007496624 | T_CLEC | Elk3      |
| Rel11     | 5,15E-07 | 0.374930016 | 0,644 | 0,362 | 0,008166109 | T_CLEC | Rel11     |
| Bmpr2     | 5,17E-07 | 0.455420354 | 0,731 | 0,46  | 0,008194341 | T_CLEC | Bmpr2     |
| Ptpn14    | 5,63E-07 | 0.353107047 | 0,394 | 0,147 | 0,008931849 | T_CLEC | Ptpn14    |
| Dysf      | 6,04E-07 | 0.279951075 | 0,544 | 0,245 | 0,009570432 | T_CLEC | Dysf      |
| Arhgef12  | 6,30E-07 | 0.343851622 | 0,575 | 0,313 | 0,00988153  | T_CLEC | Arhgef12  |
| Tm4s11    | 6,85E-07 | 0.273426204 | 0,938 | 0,521 | 0,010857072 | T_CLEC | Tm4s11    |
| Emid1     | 7,29E-07 | 0.350637623 | 0,456 | 0,19  | 0,01156158  | T_CLEC | Emid1     |
| Zcchc14   | 8,34E-07 | 0.370947528 | 0,488 | 0,221 | 0,01321559  | T_CLEC | Zcchc14   |

|          |          |             |       |       |             |   |          |
|----------|----------|-------------|-------|-------|-------------|---|----------|
| Lldrad4  | 2,67E-05 | 0.325079327 | 0,27  | 0,085 | 0,423861651 | 2 | Lldrad4  |
| Arhgap29 | 2,74E-05 | 0.303959697 | 0,825 | 0,492 | 0,434061364 | 2 | Arhgap29 |
| Myo10    | 2,74E-05 | 0.295507415 | 0,698 | 0,412 | 0,434261934 | 2 | Myo10    |
| Ublgn1   | 2,82E-05 | 0.359294559 | 0,651 | 0,373 | 0,447369862 | 2 | Ublgn1   |
| Plc11    | 2,84E-05 | 0.272970098 | 0,746 | 0,427 | 0,450461884 | 2 | Plc11    |
| Pttg11p  | 2,85E-05 | 0.329400411 | 0,841 | 0,6   | 0,451346328 | 2 | Pttg11p  |
| Bace2    | 2,91E-05 | 0.285489038 | 0,492 | 0,223 | 0,461845009 | 2 | Bace2    |
| Rnf14    | 2,92E-05 | 0.307000502 | 0,587 | 0,3   | 0,463461248 | 2 | Rnf14    |
| Ppp5c    | 3,07E-05 | 0.284879757 | 0,54  | 0,285 | 0,487032549 | 2 | Ppp5c    |
| Eif4g2   | 3,10E-05 | 0.280701533 | 1     | 0,881 | 0,490671772 | 2 | Eif4g2   |
| Zfand5   | 3,18E-05 | 0.331005636 | 0,873 | 0,635 | 0,503774664 | 2 | Zfand5   |
| Eva1a    | 3,37E-05 | 0.312475751 | 0,365 | 0,135 | 0,533575688 | 2 | Eva1a    |
| Gja11    | 3,46E-05 | 0.254429688 | 0,921 | 0,596 | 0,547950488 | 2 | Gja11    |
| Mapk11   | 3,64E-05 | 0.313       |       |       |             |   |          |

|                |          |             |       |       |             |   |      |               |
|----------------|----------|-------------|-------|-------|-------------|---|------|---------------|
| Arhgap291      | 8,43E-07 | 0,322314858 | 0,706 | 0,411 | 0,013364444 | T | CLEC | Arhgap29      |
| Raph1          | 8,46E-07 | 0,353535721 | 0,588 | 0,331 | 0,01341054  | T | CLEC | Raph1         |
| Mfge8          | 9,16E-07 | 0,484461709 | 0,7   | 0,491 | 0,014518521 | T | CLEC | Mfge8         |
| Fzd41          | 9,63E-07 | 0,290232661 | 0,656 | 0,344 | 0,015259416 | T | CLEC | Fzd4          |
| Tspan7         | 9,73E-07 | 0,537500582 | 0,456 | 0,215 | 0,015428625 | T | CLEC | Tspan7        |
| Flnb1          | 9,94E-07 | 0,392830408 | 0,694 | 0,399 | 0,015754972 | T | CLEC | Flnb          |
| 9430020K01Rik1 | 1,04E-06 | 0,468932086 | 0,725 | 0,46  | 0,016535451 | T | CLEC | 9430020K01Rik |
| Plk21          | 1,09E-06 | 0,39675858  | 0,881 | 0,601 | 0,017320809 | T | CLEC | Plk2          |
| Calm1          | 1,11E-06 | 0,297401531 | 0,994 | 0,994 | 0,017544249 | T | CLEC | Calm1         |
| Adamts7        | 1,21E-06 | 0,397200534 | 0,312 | 0,098 | 0,01917214  | T | CLEC | Adamts7       |
| Icam21         | 1,31E-06 | 0,387508757 | 0,812 | 0,485 | 0,020794087 | T | CLEC | Icam2         |
| Notch1         | 1,35E-06 | 0,554049696 | 0,744 | 0,613 | 0,021360814 | T | CLEC | Notch1        |
| Ctnnb11        | 1,35E-06 | 0,449752016 | 0,888 | 0,773 | 0,02145486  | T | CLEC | Ctnnb1        |
| Igfbp7         | 1,41E-06 | 0,319106097 | 1     | 0,54  | 0,022319507 | T | CLEC | Igfbp7        |
| Gm10800        | 1,47E-06 | 0,292839568 | 0,825 | 0,742 | 0,023244586 | T | CLEC | Gm10800       |
| Chst15         | 1,55E-06 | 0,363228046 | 0,394 | 0,153 | 0,02457498  | T | CLEC | Chst15        |
| Erg            | 1,56E-06 | 0,269671205 | 0,481 | 0,239 | 0,024788101 | T | CLEC | Erg           |
| Asap1          | 1,64E-06 | 0,416355304 | 0,594 | 0,325 | 0,026019815 | T | CLEC | Asap1         |
| Map4k4         | 1,64E-06 | 0,384637389 | 0,694 | 0,454 | 0,026045483 | T | CLEC | Map4k4        |
| Ramp21         | 1,78E-06 | 0,279894024 | 0,906 | 0,503 | 0,028140588 | T | CLEC | Ramp2         |
| Gimap41        | 1,78E-06 | 0,39508009  | 0,769 | 0,46  | 0,028237952 | T | CLEC | Gimap4        |
| Cd276          | 1,80E-06 | 0,432632487 | 0,475 | 0,239 | 0,028474311 | T | CLEC | Cd276         |
| Cgnl1          | 1,80E-06 | 0,373096176 | 0,438 | 0,19  | 0,028549819 | T | CLEC | Cgnl1         |
| 2900026A02Rik  | 1,87E-06 | 0,414067982 | 0,6   | 0,356 | 0,029669416 | T | CLEC | 2900026A02Rik |
| Cdr21          | 1,97E-06 | 0,452572483 | 0,569 | 0,325 | 0,031305566 | T | CLEC | Cdr21         |
| Sept7          | 2,04E-06 | 0,367320999 | 0,881 | 0,718 | 0,032275244 | T | CLEC | Sept7         |
| Nrf2           | 2,13E-06 | 0,332175729 | 0,5   | 0,258 | 0,033834534 | T | CLEC | Nrf2          |
| Apln           | 2,17E-06 | 0,55548212  | 0,506 | 0,258 | 0,034446058 | T | CLEC | Apln          |
| Oaf            | 2,53E-06 | 0,431973659 | 0,556 | 0,313 | 0,040154223 | T | CLEC | Oaf           |
| Shroom2        | 2,60E-06 | 0,289953807 | 0,612 | 0,344 | 0,041268517 | T | CLEC | Shroom2       |
| Thbd           | 2,73E-06 | 0,407947998 | 0,488 | 0,233 | 0,043211033 | T | CLEC | Thbd          |
| Ralb           | 2,80E-06 | 0,432192449 | 0,894 | 0,785 | 0,044424464 | T | CLEC | Ralb          |
| Caskin2        | 3,03E-06 | 0,36127263  | 0,556 | 0,325 | 0,048005108 | T | CLEC | Caskin2       |
| Yes1           | 3,18E-06 | 0,252326328 | 0,538 | 0,27  | 0,050389003 | T | CLEC | Yes1          |
| Rai14          | 3,31E-06 | 0,445859702 | 0,644 | 0,411 | 0,052405136 | T | CLEC | Rai14         |
| Ltpa4          | 3,67E-06 | 0,448630604 | 0,481 | 0,239 | 0,058140697 | T | CLEC | Ltpa4         |
| Dpysl2         | 3,80E-06 | 0,58771162  | 0,85  | 0,791 | 0,060168713 | T | CLEC | Dpysl2        |
| Dpysl3         | 3,81E-06 | 0,296128482 | 0,456 | 0,221 | 0,060329772 | T | CLEC | Dpysl3        |
| Snrk1          | 4,18E-06 | 0,269390272 | 0,831 | 0,546 | 0,066235162 | T | CLEC | Snrk          |
| Ephb4          | 4,42E-06 | 0,305961374 | 0,594 | 0,307 | 0,070094723 | T | CLEC | Ephb4         |
| Gnai2          | 4,59E-06 | 0,29156889  | 0,95  | 0,988 | 0,072754636 | T | CLEC | Gnai2         |
| Maged1         | 4,66E-06 | 0,563422566 | 0,631 | 0,399 | 0,073874162 | T | CLEC | Maged1        |
| Ccser2         | 4,71E-06 | 0,386287456 | 0,55  | 0,307 | 0,074622841 | T | CLEC | Ccser2        |
| Kif5b          | 4,94E-06 | 0,484361897 | 0,812 | 0,712 | 0,078437341 | T | CLEC | Kif5b         |
| Pitpnm2        | 5,22E-06 | 0,297188444 | 0,425 | 0,202 | 0,082809562 | T | CLEC | Pitpnm2       |
| Adamts9        | 5,27E-06 | 0,378531904 | 0,606 | 0,337 | 0,083471699 | T | CLEC | Adamts9       |
| Cav11          | 5,38E-06 | 0,28562025  | 0,7   | 0,38  | 0,085252511 | T | CLEC | Cav1          |
| Mprp1          | 5,48E-06 | 0,364892068 | 0,744 | 0,503 | 0,086945939 | T | CLEC | Mprp1         |
| Hif0           | 5,52E-06 | 0,541239849 | 0,831 | 0,712 | 0,087534416 | T | CLEC | Hif0          |
| Adgrg3         | 5,95E-06 | 0,48918233  | 0,319 | 0,117 | 0,094368219 | T | CLEC | Adgrg3        |
| Gsk3b          | 6,00E-06 | 0,39794201  | 0,85  | 0,773 | 0,095098536 | T | CLEC | Gsk3b         |
| Snn            | 6,37E-06 | 0,282652417 | 0,512 | 0,294 | 0,100934515 | T | CLEC | Snn           |
| Cdc42ep1       | 6,37E-06 | 0,474478453 | 0,575 | 0,344 | 0,100936066 | T | CLEC | Cdc42ep1      |
| Schip1         | 6,38E-06 | 0,393211964 | 0,681 | 0,448 | 0,101096861 | T | CLEC | Schip1        |
| Cav21          | 6,45E-06 | 0,382057044 | 0,694 | 0,442 | 0,102273907 | T | CLEC | Cav2          |
| Fyn            | 6,51E-06 | 0,295902753 | 0,6   | 0,325 | 0,103179885 | T | CLEC | Fyn           |
| Tek1           | 6,52E-06 | 0,447967541 | 0,644 | 0,393 | 0,103373296 | T | CLEC | Tek           |
| Pde4d          | 6,63E-06 | 0,27645824  | 0,388 | 0,16  | 0,105087899 | T | CLEC | Pde4d         |
| B3gnt31        | 6,80E-06 | 0,375189007 | 0,694 | 0,436 | 0,10783154  | T | CLEC | B3gnt3        |
| Npnt           | 6,93E-06 | 0,397939618 | 0,256 | 0,074 | 0,109861533 | T | CLEC | Npnt          |
| Unc5b          | 7,18E-06 | 0,274147362 | 0,35  | 0,135 | 0,11380748  | T | CLEC | Unc5b         |
| Lrrc58         | 7,26E-06 | 0,402139    | 0,925 | 0,926 | 0,115120819 | T | CLEC | Lrrc58        |
| Vim1           | 7,42E-06 | 0,286958509 | 1     | 0,957 | 0,117559721 | T | CLEC | Vim           |
| Map1b          | 7,62E-06 | 0,629684416 | 0,562 | 0,35  | 0,120771978 | T | CLEC | Map1b         |
| Robo41         | 7,65E-06 | 0,377454752 | 0,738 | 0,448 | 0,121306366 | T | CLEC | Robo4         |
| Mki2           | 8,94E-06 | 0,517858393 | 0,7   | 0,491 | 0,141686502 | T | CLEC | Mki2          |
| Arhgef5        | 9,18E-06 | 0,277292166 | 0,338 | 0,135 | 0,145499543 | T | CLEC | Arhgef5       |
| Atp9a          | 9,34E-06 | 0,318112685 | 0,4   | 0,166 | 0,148130551 | T | CLEC | Atp9a         |
| Pcdh1          | 9,98E-06 | 0,27460531  | 0,569 | 0,319 | 0,15820676  | T | CLEC | Pcdh1         |
| Cyb5a          | 1,04E-05 | 0,388940292 | 0,831 | 0,699 | 0,164262652 | T | CLEC | Cyb5a         |
| Calu1          | 1,05E-05 | 0,376528737 | 0,838 | 0,675 | 0,166564507 | T | CLEC | Calu          |
| Klk8           | 1,06E-05 | 0,330994938 | 0,312 | 0,117 | 0,168811384 | T | CLEC | Klk8          |
| Arhgap31       | 1,23E-05 | 0,484390556 | 0,7   | 0,515 | 0,195143003 | T | CLEC | Arhgap31      |
| Spns2          | 1,32E-05 | 0,357718842 | 0,388 | 0,178 | 0,209301082 | T | CLEC | Spns2         |
| Plat           | 1,43E-05 | 0,540920463 | 0,519 | 0,301 | 0,225980978 | T | CLEC | Plat          |
| Synpo          | 1,47E-05 | 0,443768521 | 0,625 | 0,393 | 0,232856329 | T | CLEC | Synpo         |
| Adarb1         | 1,50E-05 | 0,273835448 | 0,406 | 0,19  | 0,237031023 | T | CLEC | Adarb1        |
| Dock6          | 1,52E-05 | 0,453504286 | 0,525 | 0,307 | 0,241712547 | T | CLEC | Dock6         |
| Fkbp1a1        | 1,54E-05 | 0,304168938 | 0,981 | 0,877 | 0,244602687 | T | CLEC | Fkbp1a        |
| Slic12a2       | 1,66E-05 | 0,38788938  | 0,388 | 0,184 | 0,263666786 | T | CLEC | Slic12a2      |
| Ushbp11        | 1,68E-05 | 0,300426686 | 0,712 | 0,393 | 0,265802811 | T | CLEC | Ushbp1        |
| Emi1           | 1,73E-05 | 0,422985318 | 0,562 | 0,337 | 0,274054438 | T | CLEC | Emi1          |
| Afap111        | 1,74E-05 | 0,34078627  | 0,65  | 0,374 | 0,27555647  | T | CLEC | Afap11        |
| Gm20721        | 1,82E-05 | 0,54745896  | 0,669 | 0,528 | 0,288943511 | T | CLEC | Gm20721       |
| Notch4         | 1,90E-05 | 0,398394947 | 0,581 | 0,35  | 0,300810505 | T | CLEC | Notch4        |
| Ddah1          | 1,91E-05 | 0,359916768 | 0,425 | 0,209 | 0,303042903 | T | CLEC | Ddah1         |
| Palm           | 1,92E-05 | 0,33056359  | 0,494 | 0,258 | 0,304683637 | T | CLEC | Palm          |
| Arap3          | 1,94E-05 | 0,270792825 | 0,625 | 0,38  | 0,307119083 | T | CLEC | Arap3         |
| Smnt1          | 2,04E-05 | 0,356602198 | 0,712 | 0,46  | 0,322748663 | T | CLEC | Smnt          |
| Dll41          | 2,16E-05 | 0,397273437 | 0,594 | 0,356 | 0,343086463 | T | CLEC | Dll4          |
| Atrx           | 2,17E-05 | 0,475844661 | 0,706 | 0,552 | 0,343937093 | T | CLEC | Atrx          |
| Card10         | 2,32E-05 | 0,37321236  | 0,35  | 0,141 | 0,367405655 | T | CLEC | Card10        |
| Akap12         | 2,38E-05 | 0,411040744 | 0,469 | 0,258 | 0,376591011 | T | CLEC | Akap12        |
| Pkrar1a1       | 2,41E-05 | 0,30579563  | 0,938 | 0,859 | 0,382774675 | T | CLEC | Pkrar1a       |
| Mn1            | 2,43E-05 | 0,283743154 | 0,275 | 0,092 | 0,385750079 | T | CLEC | Mn1           |
| Myo1b1         | 2,45E-05 | 0,336252049 | 0,7   | 0,436 | 0,388229717 | T | CLEC | Myo1b         |
| Angpt2         | 2,46E-05 | 0,684426824 | 0,375 | 0,166 | 0,39023607  | T | CLEC | Angpt2        |
| Degs1          | 2,51E-05 | 0,457088662 | 0,85  | 0,73  | 0,397945737 | T | CLEC | Degs1         |
| Stc1           | 2,52E-05 | 0,548975058 | 0,481 | 0,27  | 0,398712712 | T | CLEC | Stc1          |
| Map4           | 2,64E-05 | 0,395101722 | 0,688 | 0,564 | 0,418588519 | T | CLEC | Map4          |
| Tsc22d11       | 2,64E-05 | 0,279643106 | 0,725 | 0,466 | 0,419245587 | T | CLEC | Tsc22d1       |
| Uaca           | 2,77E-05 | 0,38068016  | 0,575 | 0,337 | 0,438561093 | T | CLEC | Uaca          |
| Fam167b1       | 2,78E-05 | 0,303037354 | 0,681 | 0,429 | 0,441286441 | T | CLEC | Fam167b       |
| Mpz11          | 3,07E-05 | 0,367327427 | 0,731 | 0,448 | 0,486453928 | T | CLEC | Mpz1          |
| Fam65a         | 3,32E-05 | 0,422203985 | 0,594 | 0,423 | 0,526028531 | T | CLEC | Fam65a        |
| Fgd5           | 3,37E-05 | 0,290994808 | 0,431 | 0,227 | 0,534976884 | T | CLEC | Fgd5          |
| Nus1           | 3,42E-05 | 0,331581029 | 0,65  | 0,436 | 0,542271371 | T | CLEC | Nus1          |
| Id31           | 3,70E-05 | 0,343105616 | 0,675 | 0,448 | 0,58656728  | T | CLEC | Id3           |
| Myadm1         | 3,73E-05 | 0,31658463  | 0,862 | 0,675 | 0,591468373 | T | CLEC | Myadm         |
| Svl1           | 3,80E-05 | 0,319210406 | 0,575 | 0,399 | 0,602495338 | T | CLEC | Svl           |
| Igfbp5         | 3,80E-05 | 0,630153377 | 0,438 | 0,233 | 0,602574787 | T | CLEC | Igfbp5        |
| Dock1          | 3,96E-05 | 0,395184558 | 0,6   | 0,436 | 0,628247021 | T | CLEC | Dock1         |
| Ptn            | 4,14E-05 | 0,711101555 | 0,294 | 0,11  | 0,656200831 | T | CLEC | Ptn           |
| Pcdh12         | 4,15E-05 | 0,358425113 | 0,362 | 0,172 | 0,657072681 | T | CLEC | Pcdh12        |
| Rasgrp3        | 4,35E-05 | 0,353877829 | 0,519 | 0,294 | 0,689551174 | T | CLEC | Rasgrp3       |
| Erc1           | 4,44E-05 | 0,375883732 | 0,369 | 0,172 | 0,704024949 | T | CLEC | Erc1          |
| Ctnnd1         | 4,57E-05 | 0,341421011 | 0,644 | 0,423 | 0,724001593 | T | CLEC | Ctnnd1        |
| Vamp5          | 4,82E-05 | 0,316526275 | 0,612 | 0,417 | 0,764657649 | T | CLEC | Vamp5         |
| Cd1091         | 5,08E-05 | 0,301602953 | 0,556 | 0,319 | 0,805402779 | T | CLEC | Cd109         |
| Pdzd8          | 5,48E-05 | 0,34348895  | 0,481 | 0,294 | 0,867972173 | T | CLEC | Pdzd8         |
| Ptp4a2         | 5,53E-05 | 0,440453467 | 0,9   | 0,896 | 0,877212856 | T | CLEC | Ptp4a2        |

|          |             |             |       |       |   |   |         |
|----------|-------------|-------------|-------|-------|---|---|---------|
| Ica1     | 0,000501236 | 0,312823794 | 0,571 | 0,365 | 1 | 2 | Ica1    |
| Rlim     | 0,000512622 | 0,253499994 | 0,667 | 0,431 | 1 | 2 | Rlim    |
| Dpp3     | 0,000540095 | 0,343477923 | 0,429 | 0,238 | 1 | 2 | Dpp3    |
| Ergic3   | 0,000548746 | 0,318855904 | 0,73  | 0,554 | 1 | 2 | Ergic3  |
| Arcn1    | 0,000558171 | 0,352191232 | 0,746 | 0,6   | 1 | 2 | Arcn1   |
| Rps6ka2  | 0,000567751 | 0,253263655 | 0,444 | 0,238 | 1 | 2 | Rps6ka2 |
| Nrros    | 0,000576855 | 0,423874023 | 0,778 | 0,577 | 1 | 2 | Nrros   |
| Ppp1r13b | 0,000585686 | 0,265474825 | 0,619 | 0     |   |   |         |

|               |             |             |       |       |             |   |      |         |               |
|---------------|-------------|-------------|-------|-------|-------------|---|------|---------|---------------|
| Bvht          | 5,62E-05    | 0,294822414 | 0,562 | 0,344 | 0,891612379 | T | CLEC | Bvht    |               |
| Pcdhg4c       | 5,95E-05    | 0,363977925 | 0,562 | 0,362 | 0,943006612 | T | CLEC | Pcdhg4c |               |
| Pakap         | 6,13E-05    | 0,38214312  | 0,319 | 0,135 | 0,971257862 | T | CLEC | Pakap   |               |
| Adgrl2        | 6,32E-05    | 0,390200115 | 0,519 | 0,307 |             | 1 | T    | CLEC    | Adgrl2        |
| Slc29a1       | 6,64E-05    | 0,505126739 | 0,688 | 0,577 |             | 1 | T    | CLEC    | Slc29a1       |
| Ndfip1        | 7,28E-05    | 0,36986945  | 0,8   | 0,712 |             | 1 | T    | CLEC    | Ndfip1        |
| Zbtb20        | 7,60E-05    | 0,409627354 | 0,656 | 0,491 |             | 1 | T    | CLEC    | Zbtb20        |
| Afdn          | 8,20E-05    | 0,340616712 | 0,625 | 0,429 |             | 1 | T    | CLEC    | Afdn          |
| Sh3t1c        | 8,55E-05    | 0,380923808 | 0,356 | 0,166 |             | 1 | T    | CLEC    | Sh3t1c        |
| Bmp1          | 8,67E-05    | 0,260051547 | 0,419 | 0,215 |             | 1 | T    | CLEC    | Bmp1          |
| Arhgap26      | 8,74E-05    | 0,339685257 | 0,519 | 0,325 |             | 1 | T    | CLEC    | Arhgap26      |
| Ly6a1         | 8,83E-05    | 0,293208337 | 0,906 | 0,656 |             | 1 | T    | CLEC    | Ly6a1         |
| Irgb3         | 9,35E-05    | 0,320069191 | 0,469 | 0,276 |             | 1 | T    | CLEC    | Irgb3         |
| Tspan12       | 9,60E-05    | 0,483135922 | 0,531 | 0,337 |             | 1 | T    | CLEC    | Tspan12       |
| Parva         | 9,89E-05    | 0,301882302 | 0,45  | 0,245 |             | 1 | T    | CLEC    | Parva         |
| Reep3         | 9,94E-05    | 0,320475597 | 0,675 | 0,509 |             | 1 | T    | CLEC    | Reep3         |
| Crmp1         | 0,000102717 | 0,310282239 | 0,288 | 0,11  |             | 1 | T    | CLEC    | Crmp1         |
| Pik3c2b       | 0,00011801  | 0,319685118 | 0,588 | 0,405 |             | 1 | T    | CLEC    | Pik3c2b       |
| Chst1         | 0,00014525  | 0,303281245 | 0,388 | 0,19  |             | 1 | T    | CLEC    | Chst1         |
| Actn4         | 0,00014741  | 0,301318744 | 0,9   | 0,773 |             | 1 | T    | CLEC    | Actn4         |
| Kcng1         | 0,00018255  | 0,430897395 | 0,531 | 0,335 |             | 1 | T    | CLEC    | Kcng1         |
| Tnfrap11      | 0,000124338 | 0,31830248  | 0,8   | 0,564 |             | 1 | T    | CLEC    | Tnfrap11      |
| S100a13       | 0,000131118 | 0,268095184 | 0,812 | 0,706 |             | 1 | T    | CLEC    | S100a13       |
| Cda           | 0,000132932 | 0,27808401  | 0,35  | 0,178 |             | 1 | T    | CLEC    | Cda           |
| Lmna1         | 0,000137631 | 0,340117405 | 0,788 | 0,663 |             | 1 | T    | CLEC    | Lmna1         |
| Myo6          | 0,000138192 | 0,336224915 | 0,269 | 0,11  |             | 1 | T    | CLEC    | Myo6          |
| Kit1          | 0,000145496 | 0,415920687 | 0,494 | 0,294 |             | 1 | T    | CLEC    | Kit1          |
| Ar14a         | 0,000146001 | 0,410487366 | 0,544 | 0,356 |             | 1 | T    | CLEC    | Ar14a         |
| Macf1         | 0,000152552 | 0,344420381 | 0,8   | 0,706 |             | 1 | T    | CLEC    | Macf1         |
| Clic4         | 0,000152929 | 0,276785766 | 0,906 | 0,798 |             | 1 | T    | CLEC    | Clic4         |
| Dok4          | 0,000155742 | 0,364853341 | 0,356 | 0,172 |             | 1 | T    | CLEC    | Dok4          |
| Sox13         | 0,000178885 | 0,280631472 | 0,338 | 0,166 |             | 1 | T    | CLEC    | Sox13         |
| Gnas1         | 0,000179892 | 0,312170038 | 0,938 | 0,859 |             | 1 | T    | CLEC    | Gnas1         |
| Gnb41         | 0,000180478 | 0,312900797 | 0,562 | 0,337 |             | 1 | T    | CLEC    | Gnb41         |
| Nhs1          | 0,000186466 | 0,326264137 | 0,45  | 0,227 |             | 1 | T    | CLEC    | Nhs1          |
| Cep170        | 0,000207056 | 0,287051096 | 0,438 | 0,276 |             | 1 | T    | CLEC    | Cep170        |
| Pde4b         | 0,000207417 | 0,414544573 | 0,7   | 0,528 |             | 1 | T    | CLEC    | Pde4b         |
| Slc44a1       | 0,000207879 | 0,298591531 | 0,569 | 0,362 |             | 1 | T    | CLEC    | Slc44a1       |
| Antxr1        | 0,000210919 | 0,250844934 | 0,369 | 0,196 |             | 1 | T    | CLEC    | Antxr1        |
| Utrn          | 0,00021538  | 0,31240315  | 0,538 | 0,356 |             | 1 | T    | CLEC    | Utrn          |
| Xiap          | 0,000216332 | 0,354682988 | 0,706 | 0,558 |             | 1 | T    | CLEC    | Xiap          |
| Hes11         | 0,00021634  | 0,302590425 | 0,694 | 0,466 |             | 1 | T    | CLEC    | Hes11         |
| Anxa1         | 0,000223214 | 0,370474088 | 0,775 | 0,632 |             | 1 | T    | CLEC    | Anxa1         |
| Gm28875       | 0,000224252 | 0,278585464 | 0,325 | 0,153 |             | 1 | T    | CLEC    | Gm28875       |
| Fgfr1         | 0,000236604 | 0,322882105 | 0,35  | 0,178 |             | 1 | T    | CLEC    | Fgfr1         |
| Knop1         | 0,00024405  | 0,289053655 | 0,562 | 0,362 |             | 1 | T    | CLEC    | Knop1         |
| N4bp3         | 0,000252129 | 0,434468526 | 0,506 | 0,325 |             | 1 | T    | CLEC    | N4bp3         |
| Tmed9         | 0,000256131 | 0,356753475 | 0,675 | 0,546 |             | 1 | T    | CLEC    | Tmed9         |
| mt-Cyb        | 0,000263912 | 0,288288319 | 1     | 1     |             | 1 | T    | CLEC    | mt-Cyb        |
| Lxn1          | 0,00026563  | 0,303804144 | 0,725 | 0,552 |             | 1 | T    | CLEC    | Lxn1          |
| Chst2         | 0,000265848 | 0,264674026 | 0,331 | 0,16  |             | 1 | T    | CLEC    | Chst2         |
| Igf1bp4       | 0,000269983 | 0,284714353 | 0,844 | 0,724 |             | 1 | T    | CLEC    | Igf1bp4       |
| Itsn2         | 0,000280444 | 0,345078851 | 0,694 | 0,515 |             | 1 | T    | CLEC    | Itsn2         |
| Efnb2         | 0,000286665 | 0,344939004 | 0,344 | 0,178 |             | 1 | T    | CLEC    | Efnb2         |
| Gprc5b        | 0,00029027  | 0,277617374 | 0,275 | 0,123 |             | 1 | T    | CLEC    | Gprc5b        |
| Wwc2          | 0,000290484 | 0,266180351 | 0,381 | 0,202 |             | 1 | T    | CLEC    | Wwc2          |
| Serpin6a      | 0,000290698 | 0,379676675 | 0,669 | 0,515 |             | 1 | T    | CLEC    | Serpin6a      |
| Tspan6        | 0,000297723 | 0,39338599  | 0,431 | 0,252 |             | 1 | T    | CLEC    | Tspan6        |
| Kmt2a         | 0,000318277 | 0,319749982 | 0,4   | 0,227 |             | 1 | T    | CLEC    | Kmt2a         |
| Fam212a       | 0,000324941 | 0,272117349 | 0,412 | 0,233 |             | 1 | T    | CLEC    | Fam212a       |
| Myo18a        | 0,000326891 | 0,304157189 | 0,462 | 0,288 |             | 1 | T    | CLEC    | Myo18a        |
| Slc43a3       | 0,000340239 | 0,388144511 | 0,5   | 0,319 |             | 1 | T    | CLEC    | Slc43a3       |
| Nxn           | 0,000340697 | 0,331971491 | 0,338 | 0,178 |             | 1 | T    | CLEC    | Nxn           |
| Luzp1         | 0,000347366 | 0,417206723 | 0,712 | 0,595 |             | 1 | T    | CLEC    | Luzp1         |
| Myh9          | 0,000350885 | 0,344124233 | 0,975 | 0,975 |             | 1 | T    | CLEC    | Myh9          |
| Pitpnc1       | 0,000354424 | 0,331671698 | 0,681 | 0,54  |             | 1 | T    | CLEC    | Pitpnc1       |
| Ywhah         | 0,000359595 | 0,370578185 | 0,9   | 0,859 |             | 1 | T    | CLEC    | Ywhah         |
| Atrn          | 0,000364932 | 0,336049233 | 0,375 | 0,209 |             | 1 | T    | CLEC    | Atrn          |
| Wasf2         | 0,000368648 | 0,379431035 | 0,806 | 0,834 |             | 1 | T    | CLEC    | Wasf2         |
| Tmem263       | 0,000369705 | 0,287203999 | 0,519 | 0,325 |             | 1 | T    | CLEC    | Tmem263       |
| Sema6a        | 0,000375916 | 0,252664637 | 0,5   | 0,313 |             | 1 | T    | CLEC    | Sema6a        |
| BC028528      | 0,000392859 | 0,367619491 | 0,856 | 0,785 |             | 1 | T    | CLEC    | BC028528      |
| Tgfb11        | 0,000394662 | 0,309433652 | 0,462 | 0,27  |             | 1 | T    | CLEC    | Tgfb11        |
| Ptpn12        | 0,000415412 | 0,288709055 | 0,531 | 0,325 |             | 1 | T    | CLEC    | Ptpn12        |
| Pkp4          | 0,00049107  | 0,335522694 | 0,412 | 0,245 |             | 1 | T    | CLEC    | Pkp4          |
| Hyal2         | 0,000501786 | 0,321001844 | 0,525 | 0,325 |             | 1 | T    | CLEC    | Hyal2         |
| Ptk2          | 0,000502855 | 0,320442871 | 0,506 | 0,294 |             | 1 | T    | CLEC    | Ptk2          |
| Kdm5b         | 0,000507986 | 0,36887685  | 0,294 | 0,147 |             | 1 | T    | CLEC    | Kdm5b         |
| Cers4         | 0,000518262 | 0,27065144  | 0,319 | 0,147 |             | 1 | T    | CLEC    | Cers4         |
| Pclb1         | 0,000532715 | 0,309519361 | 0,3   | 0,147 |             | 1 | T    | CLEC    | Pclb1         |
| Eif3a         | 0,000544827 | 0,341909235 | 0,694 | 0,601 |             | 1 | T    | CLEC    | Eif3a         |
| Gm10925       | 0,000551859 | 0,33313548  | 0,962 | 0,957 |             | 1 | T    | CLEC    | Gm10925       |
| Magi1         | 0,000557588 | 0,334726877 | 0,331 | 0,178 |             | 1 | T    | CLEC    | Magi1         |
| Myo1d         | 0,000560493 | 0,302865678 | 0,281 | 0,129 |             | 1 | T    | CLEC    | Myo1d         |
| Pncp          | 0,000566622 | 0,484362351 | 0,738 | 0,613 |             | 1 | T    | CLEC    | Pncp          |
| Pclg1         | 0,000603761 | 0,276300851 | 0,581 | 0,399 |             | 1 | T    | CLEC    | Pclg1         |
| Slc44a2       | 0,000625927 | 0,253253199 | 0,506 | 0,301 |             | 1 | T    | CLEC    | Slc44a2       |
| Lrrc32        | 0,000637726 | 0,260191584 | 0,312 | 0,147 |             | 1 | T    | CLEC    | Lrrc32        |
| Ndrp1         | 0,000640727 | 0,406177704 | 0,538 | 0,356 |             | 1 | T    | CLEC    | Ndrp1         |
| Gna11         | 0,000651048 | 0,284936103 | 0,644 | 0,46  |             | 1 | T    | CLEC    | Gna11         |
| Cd151         | 0,000659299 | 0,343540265 | 0,556 | 0,399 |             | 1 | T    | CLEC    | Cd151         |
| Clec1a        | 0,000660807 | 0,331238128 | 0,5   | 0,307 |             | 1 | T    | CLEC    | Clec1a        |
| CT010467.1    | 0,000663896 | 0,330126578 | 1     | 1     |             | 1 | T    | CLEC    | CT010467.1    |
| Jam2          | 0,000664565 | 0,413803251 | 0,469 | 0,276 |             | 1 | T    | CLEC    | Jam2          |
| Pea15a        | 0,000722173 | 0,260030501 | 0,875 | 0,828 |             | 1 | T    | CLEC    | Pea15a        |
| Sdpr          | 0,000725861 | 0,342258114 | 0,369 | 0,196 |             | 1 | T    | CLEC    | Sdpr          |
| Selenom       | 0,000743172 | 0,288480793 | 0,619 | 0,442 |             | 1 | T    | CLEC    | Selenom       |
| 2810025M15Rik | 0,00082117  | 0,279793196 | 0,538 | 0,38  |             | 1 | T    | CLEC    | 2810025M15Rik |
| Rock2         | 0,000821921 | 0,305713567 | 0,562 | 0,387 |             | 1 | T    | CLEC    | Rock2         |
| Sh2d3c1       | 0,000855761 | 0,258887412 | 0,731 | 0,497 |             | 1 | T    | CLEC    | Sh2d3c1       |
| Kdelr2        | 0,000874899 | 0,368023934 | 0,925 | 0,89  |             | 1 | T    | CLEC    | Kdelr2        |
| Nostrin1      | 0,000882154 | 0,324043712 | 0,65  | 0,472 |             | 1 | T    | CLEC    | Nostrin1      |
| Pja2          | 0,000947355 | 0,292688817 | 0,5   | 0,313 |             | 1 | T    | CLEC    | Pja2          |
| 9530082P21Rik | 0,000954694 | 0,317869124 | 0,606 | 0,436 |             | 1 | T    | CLEC    | 9530082P21Rik |
| Gimap1        | 0,000968009 | 0,315140841 | 0,519 | 0,362 |             | 1 | T    | CLEC    | Gimap1        |
| Cdc42ep3      | 0,000977205 | 0,303534927 | 0,544 | 0,368 |             | 1 | T    | CLEC    | Cdc42ep3      |
| Ccdc88a       | 0,000995849 | 0,309125864 | 0,394 | 0,221 |             | 1 | T    | CLEC    | Ccdc88a       |
| Cracr2b       | 0,001051215 | 0,262238606 | 0,6   | 0,423 |             | 1 | T    | CLEC    | Cracr2b       |
| Nudt3         | 0,001094877 | 0,392298334 | 0,55  | 0,454 |             | 1 | T    | CLEC    | Nudt3         |
| Cmp1          | 0,001142589 | 0,444285402 | 0,631 | 0,512 |             | 1 | T    | CLEC    | Cmp1          |
| Abcg1         | 0,00116459  | 0,442718814 | 0,744 | 0,62  |             | 1 | T    | CLEC    | Abcg1         |
| Abli1m1       | 0,001251842 | 0,262806264 | 0,475 | 0,301 |             | 1 | T    | CLEC    | Abli1m1       |
| Prkd3         | 0,001281146 | 0,267707643 | 0,381 | 0,233 |             | 1 | T    | CLEC    | Prkd3         |
| Irga6         | 0,001355501 | 0,305633704 | 0,788 | 0,699 |             | 1 | T    | CLEC    | Irga6         |
| Ralgapa1      | 0,001363984 | 0,339566881 | 0,331 | 0,19  |             | 1 | T    | CLEC    | Ralgapa1      |
| Klc1          | 0,001385996 | 0,311567039 | 0,531 | 0,356 |             | 1 | T    | CLEC    | Klc1          |
| Dcbl1d        | 0,001390359 | 0,389347912 | 0,394 | 0,239 |             | 1 | T    | CLEC    | Dcbl1d        |
| Cds2          | 0,001451512 | 0,294881811 | 0,556 | 0,387 |             | 1 | T    | CLEC    | Cds2          |
| Plekhg1       | 0,001527563 | 0,282052799 | 0,481 | 0,301 |             | 1 | T    | CLEC    | Plekhg1       |
| Slc39a10      | 0,001670643 | 0,276357912 | 0,394 | 0,227 |             | 1 | T    | CLEC    | Slc39a10      |
| Ttc3          | 0,001682459 | 0,26267439  | 0,456 | 0,294 |             | 1 | T    | CLEC    | Ttc3          |
| Alig14        | 0,001694156 | 0,254388604 | 0,375 | 0,221 |             | 1 | T    | CLEC    | Alig14        |

|         |          |             |       |       |          |   |         |
|---------|----------|-------------|-------|-------|----------|---|---------|
| Esm1    | 3,36E-12 | 1,376155896 | 0,448 | 0,094 | 5,32E-08 | 3 | Esm1    |
| Cola11  | 5,60E-12 | 0,692083609 | 1     | 0,728 | 8,88E-08 | 3 | Cola11  |
| Creb3l2 | 2,20E-11 | 0,843799329 | 0,862 | 0,506 | 3,49E-07 | 3 | Creb3l2 |
| S1pr11  | 2,89E-11 | 0,706335588 | 1     | 0,717 | 4,57E-07 | 3 | S1pr11  |
| Kcnj2   | 3,71E-11 | 0,357473388 | 0,483 | 0,109 | 5,88E-07 | 3 | Kcnj2   |
| Ap1p2   | 6,22E-11 | 0,781074018 | 0,983 | 0,792 | 9,86E-07 | 3 | Ap1p2   |
| Map4k4  | 6,70E-11 | 0,529558759 | 0,897 | 0,502 | 1,06E-06 | 3 | Map4k4  |
| Pde4b   | 9,68E-11 | 0,915846342 | 0,845 | 0,562 | 1,54E-06 | 3 | Pde4b   |
| Ackr3   | 9,83E-11 | 0,768548551 | 0,759 | 0,347 | 1,56E-06 | 3 | Ackr3   |
| Rel11   | 1,45E-10 |             |       |       |          |   |         |



|               |             |             |       |       |   |        |               |
|---------------|-------------|-------------|-------|-------|---|--------|---------------|
| Pkn3          | 0,001749733 | 0,275428701 | 0,462 | 0,276 | 1 | T_CLEC | Pkn3          |
| Pde8a         | 0,00175401  | 0,268780404 | 0,381 | 0,221 | 1 | T_CLEC | Pde8a         |
| Snacp3        | 0,001760945 | 0,25791918  | 0,269 | 0,135 | 1 | T_CLEC | Snacp3        |
| Itga5         | 0,001794426 | 0,357844365 | 0,681 | 0,577 | 1 | T_CLEC | Itga5         |
| Ctdsp2        | 0,001812582 | 0,262783983 | 0,581 | 0,436 | 1 | T_CLEC | Ctdsp2        |
| Hk1           | 0,001891011 | 0,289653142 | 0,5   | 0,344 | 1 | T_CLEC | Hk1           |
| Tinag1        | 0,001920636 | 0,353216326 | 0,294 | 0,153 | 1 | T_CLEC | Tinag1        |
| Lats2         | 0,002018519 | 0,305548173 | 0,481 | 0,337 | 1 | T_CLEC | Lats2         |
| Nrep          | 0,002044581 | 0,408732183 | 0,55  | 0,472 | 1 | T_CLEC | Nrep          |
| Srm2          | 0,002260807 | 0,366194375 | 0,762 | 0,687 | 1 | T_CLEC | Srm2          |
| Zdhhc20       | 0,002471077 | 0,343752124 | 0,731 | 0,65  | 1 | T_CLEC | Zdhhc20       |
| Tmem254c      | 0,002497832 | 0,331700681 | 0,544 | 0,405 | 1 | T_CLEC | Tmem254c      |
| Stim2         | 0,002514976 | 0,256667114 | 0,394 | 0,245 | 1 | T_CLEC | Stim2         |
| Ehd31         | 0,002639697 | 0,29335219  | 0,456 | 0,294 | 1 | T_CLEC | Ehd31         |
| Fkbp7         | 0,002645022 | 0,259691075 | 0,375 | 0,233 | 1 | T_CLEC | Fkbp7         |
| Git1          | 0,002700754 | 0,310582965 | 0,525 | 0,393 | 1 | T_CLEC | Git1          |
| Nras          | 0,00277803  | 0,377061434 | 0,762 | 0,73  | 1 | T_CLEC | Nras          |
| Tm9sf3        | 0,003041149 | 0,36264105  | 0,688 | 0,656 | 1 | T_CLEC | Tm9sf3        |
| Qk            | 0,003104941 | 0,35752943  | 0,831 | 0,822 | 1 | T_CLEC | Qk            |
| Pmp22         | 0,003119302 | 0,262236614 | 0,319 | 0,184 | 1 | T_CLEC | Pmp22         |
| Ktn1          | 0,003155091 | 0,384753554 | 0,594 | 0,479 | 1 | T_CLEC | Ktn1          |
| Csgalnact1    | 0,003242025 | 0,258687835 | 0,275 | 0,141 | 1 | T_CLEC | Csgalnact1    |
| Kbtdb11       | 0,003336894 | 0,398340367 | 0,319 | 0,202 | 1 | T_CLEC | Kbtdb11       |
| Ywhaq         | 0,003396847 | 0,302274585 | 0,856 | 0,822 | 1 | T_CLEC | Ywhaq         |
| Cd81          | 0,003717476 | 0,266026593 | 0,956 | 1     | 1 | T_CLEC | Cd81          |
| Hnmpa0        | 0,003806744 | 0,27475952  | 0,612 | 0,528 | 1 | T_CLEC | Hnmpa0        |
| Baz2b         | 0,003838272 | 0,294742479 | 0,488 | 0,344 | 1 | T_CLEC | Baz2b         |
| Rsu1          | 0,003907325 | 0,340664423 | 0,769 | 0,712 | 1 | T_CLEC | Rsu1          |
| Tspan15       | 0,004113667 | 0,273670603 | 0,45  | 0,288 | 1 | T_CLEC | Tspan15       |
| Calm2         | 0,004116502 | 0,325087898 | 0,944 | 0,975 | 1 | T_CLEC | Calm2         |
| Lrrc8b        | 0,004325636 | 0,282599113 | 0,388 | 0,258 | 1 | T_CLEC | Lrrc8b        |
| Clip1         | 0,004609183 | 0,262473195 | 0,4   | 0,258 | 1 | T_CLEC | Clip1         |
| Tex2          | 0,004630845 | 0,266233961 | 0,275 | 0,147 | 1 | T_CLEC | Tex2          |
| Arglu1        | 0,004786393 | 0,431641344 | 0,888 | 0,883 | 1 | T_CLEC | Arglu1        |
| Etnk1         | 0,004899447 | 0,252834252 | 0,406 | 0,264 | 1 | T_CLEC | Etnk1         |
| Man1a         | 0,004973127 | 0,340541532 | 0,575 | 0,454 | 1 | T_CLEC | Man1a         |
| Pgm21         | 0,004997479 | 0,274242155 | 0,338 | 0,215 | 1 | T_CLEC | Pgm21         |
| C1qtnf1       | 0,005279843 | 0,362553092 | 0,4   | 0,27  | 1 | T_CLEC | C1qtnf1       |
| Exoc3         | 0,005310583 | 0,350765273 | 0,406 | 0,276 | 1 | T_CLEC | Exoc3         |
| Spsb1         | 0,005373574 | 0,406374226 | 0,5   | 0,38  | 1 | T_CLEC | Spsb1         |
| Rgs3          | 0,005383153 | 0,278570909 | 0,45  | 0,313 | 1 | T_CLEC | Rgs3          |
| Smurf1        | 0,005489984 | 0,304696081 | 0,262 | 0,147 | 1 | T_CLEC | Smurf1        |
| Cpne8         | 0,005907166 | 0,263450321 | 0,538 | 0,429 | 1 | T_CLEC | Cpne8         |
| Spata13       | 0,006252126 | 0,393009621 | 0,519 | 0,442 | 1 | T_CLEC | Spata13       |
| Tmod3         | 0,006360464 | 0,324660589 | 0,806 | 0,761 | 1 | T_CLEC | Tmod3         |
| Map1lc3b      | 0,006674199 | 0,359498121 | 0,925 | 0,896 | 1 | T_CLEC | Map1lc3b      |
| Gbas          | 0,006767079 | 0,303243236 | 0,656 | 0,564 | 1 | T_CLEC | Gbas          |
| Arf2          | 0,006940577 | 0,367738716 | 0,569 | 0,466 | 1 | T_CLEC | Arf2          |
| Anxa6         | 0,006970939 | 0,4633684   | 0,569 | 0,485 | 1 | T_CLEC | Anxa6         |
| 4931406P16Rik | 0,006972815 | 0,256221479 | 0,588 | 0,436 | 1 | T_CLEC | 4931406P16Rik |
| C330006A16Rik | 0,007122215 | 0,365214361 | 0,681 | 0,613 | 1 | T_CLEC | C330006A16Rik |
| Cyb5r3        | 0,007323879 | 0,306025389 | 0,75  | 0,706 | 1 | T_CLEC | Cyb5r3        |
| Procr         | 0,007782965 | 0,250135015 | 0,362 | 0,233 | 1 | T_CLEC | Procr         |
| Sptlc1        | 0,007783153 | 0,257727944 | 0,35  | 0,221 | 1 | T_CLEC | Sptlc1        |
| Csnk1a1       | 0,008848546 | 0,270394507 | 0,781 | 0,724 | 1 | T_CLEC | Csnk1a1       |
| Stap2         | 0,008985051 | 0,280054259 | 0,462 | 0,344 | 1 | T_CLEC | Stap2         |
| Zhx3          | 0,009298644 | 0,263782778 | 0,356 | 0,239 | 1 | T_CLEC | Zhx3          |
| Akr1b8        | 0,009748903 | 0,331724812 | 0,444 | 0,319 | 1 | T_CLEC | Akr1b8        |
| Golm1         | 0,009858126 | 0,371577359 | 0,538 | 0,423 | 1 | T_CLEC | Golm1         |

|            |             |             |       |       |             |   |            |
|------------|-------------|-------------|-------|-------|-------------|---|------------|
| Ldb2       | 2,51E-05    | 0,432260169 | 0,845 | 0,577 | 0,397233775 | 3 | Ldb2       |
| Ehd21      | 2,92E-05    | 0,393546713 | 0,776 | 0,483 | 0,463260525 | 3 | Ehd21      |
| Cyr61      | 3,06E-05    | 1,106653475 | 0,431 | 0,189 | 0,484827988 | 3 | Cyr61      |
| Kdr1       | 3,21E-05    | 0,513869233 | 0,862 | 0,619 | 0,509284034 | 3 | Kdr1       |
| Ndrp1      | 3,37E-05    | 0,896623439 | 0,621 | 0,408 | 0,534213286 | 3 | Ndrp1      |
| Lpp        | 3,42E-05    | 0,446363199 | 0,81  | 0,63  | 0,54199634  | 3 | Lpp        |
| Tspan15    | 3,82E-05    | 0,449564908 | 0,586 | 0,321 | 0,605243235 | 3 | Tspan15    |
| Hif1a      | 4,00E-05    | 0,572910499 | 0,931 | 0,781 | 0,634745764 | 3 | Hif1a      |
| Akap2      | 4,26E-05    | 0,39523042  | 0,621 | 0,347 | 0,675633443 | 3 | Akap2      |
| Grb10      | 4,27E-05    | 0,548075186 | 0,638 | 0,404 | 0,676848723 | 3 | Grb10      |
| Plec1      | 4,32E-05    | 0,469254189 | 0,931 | 0,747 | 0,684916766 | 3 | Plec1      |
| Igfbp32    | 4,35E-05    | 0,392919314 | 1     | 0,732 | 0,689539659 | 3 | Igfbp32    |
| Chst15     | 4,37E-05    | 0,42248181  | 0,483 | 0,226 | 0,692850343 | 3 | Chst15     |
| Col18a11   | 4,40E-05    | 0,575193072 | 0,81  | 0,547 | 0,697529911 | 3 | Col18a11   |
| Map4k5     | 4,42E-05    | 0,43126603  | 0,707 | 0,438 | 0,70088377  | 3 | Map4k5     |
| C77080     | 4,71E-05    | 0,346218342 | 0,448 | 0,211 | 0,74629243  | 3 | C77080     |
| Kdelr3     | 4,75E-05    | 0,475691384 | 0,414 | 0,174 | 0,753149499 | 3 | Kdelr3     |
| PIK21      | 5,10E-05    | 0,46790768  | 0,931 | 0,698 | 0,808948698 | 3 | PIK21      |
| Fam43a1    | 5,38E-05    | 0,375549168 | 0,655 | 0,389 | 0,85291522  | 3 | Fam43a1    |
| Chst2      | 5,39E-05    | 0,413297352 | 0,431 | 0,204 | 0,854948742 | 3 | Chst2      |
| Akap12     | 5,61E-05    | 0,33632947  | 0,586 | 0,313 | 0,888603297 | 3 | Akap12     |
| Igfb3      | 5,81E-05    | 0,503568213 | 0,586 | 0,325 | 0,921506972 | 3 | Igfb3      |
| Micall2    | 6,14E-05    | 0,309037834 | 0,517 | 0,268 | 0,97299287  | 3 | Micall2    |
| Prss23     | 6,38E-05    | 0,527591969 | 0,845 | 0,57  | 1           | 3 | Prss23     |
| Timp3      | 6,44E-05    | 0,313600744 | 0,879 | 0,6   | 1           | 3 | Timp3      |
| S100a16    | 6,59E-05    | 0,381437219 | 0,931 | 0,623 | 1           | 3 | S100a16    |
| Sh2d5      | 6,61E-05    | 0,446086491 | 0,362 | 0,147 | 1           | 3 | Sh2d5      |
| Arhgap29   | 7,02E-05    | 0,428095998 | 0,776 | 0,509 | 1           | 3 | Arhgap29   |
| Cda        | 7,30E-05    | 0,445817914 | 0,431 | 0,226 | 1           | 3 | Cda        |
| Mast4      | 7,69E-05    | 0,424376561 | 0,759 | 0,494 | 1           | 3 | Mast4      |
| Adams4     | 8,12E-05    | 0,294134862 | 0,672 | 0,389 | 1           | 3 | Adams4     |
| Notch4     | 8,41E-05    | 0,491441442 | 0,655 | 0,423 | 1           | 3 | Notch4     |
| Tmem2      | 9,05E-05    | 0,297996431 | 0,759 | 0,483 | 1           | 3 | Tmem2      |
| Dbn1       | 9,44E-05    | 0,445566515 | 0,707 | 0,472 | 1           | 3 | Dbn1       |
| Bnip3      | 9,47E-05    | 0,797228542 | 0,379 | 0,181 | 1           | 3 | Bnip3      |
| Plxna2     | 9,72E-05    | 0,348934404 | 0,621 | 0,343 | 1           | 3 | Plxna2     |
| Tm9sf3     | 0,000100406 | 0,536085472 | 0,776 | 0,649 | 1           | 3 | Tm9sf3     |
| Ctnna1     | 0,000104287 | 0,357271233 | 0,948 | 0,77  | 1           | 3 | Ctnna1     |
| Gpr41      | 0,000105723 | 0,250781709 | 0,845 | 0,555 | 1           | 3 | Gpr41      |
| Jup        | 0,00010842  | 0,414918748 | 0,914 | 0,694 | 1           | 3 | Jup        |
| Rhoc       | 0,000112437 | 0,295921044 | 0,948 | 0,683 | 1           | 3 | Rhoc       |
| Nrep       | 0,000121754 | 0,375001321 | 0,672 | 0,475 | 1           | 3 | Nrep       |
| Chsy1      | 0,000123329 | 0,299096569 | 0,552 | 0,302 | 1           | 3 | Chsy1      |
| Pgk1       | 0,000127007 | 0,551791572 | 0,845 | 0,687 | 1           | 3 | Pgk1       |
| Ppp1r13b   | 0,00012809  | 0,30533374  | 0,638 | 0,381 | 1           | 3 | Ppp1r13b   |
| Itga1      | 0,000128243 | 0,30881509  | 0,5   | 0,253 | 1           | 3 | Itga1      |
| Reep1      | 0,000129011 | 0,306825567 | 0,379 | 0,158 | 1           | 3 | Reep1      |
| Rgs3       | 0,000133909 | 0,426540657 | 0,586 | 0,336 | 1           | 3 | Rgs3       |
| Myo1d      | 0,000139647 | 0,452280739 | 0,379 | 0,166 | 1           | 3 | Myo1d      |
| Amot1      | 0,000140639 | 0,435119742 | 0,707 | 0,487 | 1           | 3 | Amot1      |
| Flnb       | 0,000149751 | 0,385152641 | 0,776 | 0,494 | 1           | 3 | Flnb       |
| Nectin2    | 0,000154654 | 0,430202506 | 0,621 | 0,4   | 1           | 3 | Nectin2    |
| Icam2      | 0,000158273 | 0,401703475 | 0,862 | 0,6   | 1           | 3 | Icam2      |
| Tuba1a     | 0,000169744 | 0,403501793 | 0,914 | 0,679 | 1           | 3 | Tuba1a     |
| Gas7       | 0,000171968 | 0,421004561 | 0,414 | 0,196 | 1           | 3 | Gas7       |
| Coro1c     | 0,000173984 | 0,408631047 | 0,862 | 0,721 | 1           | 3 | Coro1c     |
| Igfb1      | 0,000174651 | 0,31365646  | 0,983 | 0,932 | 1           | 3 | Igfb1      |
| AC107851.2 | 0,000183049 | 0,295286361 | 0,259 | 0,087 | 1           | 3 | AC107851.2 |
| Tmem47     | 0,000185825 | 0,29575561  | 0,483 | 0,23  | 1           | 3 | Tmem47     |
| Pcdhgc4    | 0,00019611  | 0,416164948 | 0,655 | 0,419 | 1           | 3 | Pcdhgc4    |
| Plau       | 0,00021215  | 0,256471971 | 0,5   | 0,268 | 1           | 3 | Plau       |
| Bsg        | 0,000231421 | 0,304444128 | 0,983 | 0,917 | 1           | 3 | Bsg        |
| Tshz2      | 0,000236386 | 0,316968992 | 0,655 | 0,4   | 1           | 3 | Tshz2      |
| Schip1     | 0,000239855 | 0,304511868 | 0,776 | 0,517 | 1           | 3 | Schip1     |
| Myo1b      | 0,000277628 | 0,274669282 | 0,793 | 0,517 | 1           | 3 | Myo1b      |
| Tmem204    | 0,000286395 | 0,419805915 | 0,776 | 0,502 | 1           | 3 | Tmem204    |
| Nov4       | 0,000296618 | 0,29943725  | 0,345 | 0,147 | 1           | 3 | Nov4       |
| Sept2      | 0,00029712  | 0,377572936 | 1     | 0,951 | 1           | 3 | Sept2      |
| Sept11     | 0,00029906  | 0,388273735 | 0,741 | 0,525 | 1           | 3 | Sept11     |
| Mpl2       | 0,000314681 | 0,450637915 | 0,776 | 0,547 | 1           | 3 | Mpl2       |
| Sacs       | 0,000316536 | 0,38574343  | 0,293 | 0,117 | 1           | 3 | Sacs       |
| Fermt2     | 0,000317809 | 0,279084842 | 0,845 | 0,551 | 1           | 3 | Fermt2     |
| Cald1      | 0,000320291 | 0,360772912 | 0,828 | 0,619 | 1           | 3 | Cald1      |
| S100a6     | 0,000330296 | 0,306424646 | 0,948 | 0,796 | 1           | 3 | S100a6     |
| Gm4202     | 0,000337858 | 0,281781909 | 0,966 | 0,83  | 1           | 3 | Gm4202     |
| Fam212a    | 0,000340777 | 0,294926903 | 0,517 | 0,279 | 1           | 3 | Fam212a    |
| Card10     | 0,000342272 | 0,307244952 | 0,431 | 0,204 | 1           | 3 | Card10     |
| Calu       | 0,000343173 | 0,417823106 | 0,862 | 0,732 | 1           | 3 | Calu       |
| Map1b      | 0,000349102 | 0,522196968 | 0,638 | 0,415 | 1           | 3 | Map1b      |
| Snrk       | 0,000350288 | 0,385360136 | 0,862 | 0,649 | 1           | 3 | Snrk       |
| Emp1       | 0,000377214 | 0,347787377 | 0,879 | 0,725 | 1           | 3 | Emp1       |
| Farp1      | 0,000383477 | 0,280904517 | 0,293 | 0,117 | 1           | 3 | Farp1      |
| Pja2       | 0,000384205 | 0,389043706 | 0,603 | 0,362 | 1           | 3 | Pja2       |
| Klk8       | 0,000400105 | 0,343688866 |       |       |             |   |            |

|               |             |             |       |       |          |   |               |
|---------------|-------------|-------------|-------|-------|----------|---|---------------|
| Pdgfb         | 0,000944547 | 0,312291818 | 0,69  | 0,479 | 1        | 3 | Pdgfb         |
| Tnfrsf23      | 0,000971934 | 0,265025841 | 0,483 | 0,272 | 1        | 3 | Tnfrsf23      |
| Bmp1          | 0,000974187 | 0,351060694 | 0,5   | 0,275 | 1        | 3 | Bmp1          |
| Ddah1         | 0,000993968 | 0,435381861 | 0,466 | 0,283 | 1        | 3 | Ddah1         |
| Stim2         | 0,001031484 | 0,366436406 | 0,483 | 0,283 | 1        | 3 | Stim2         |
| Egfl72        | 0,001055202 | 0,303468524 | 1     | 0,702 | 1        | 3 | Egfl72        |
| Cab39         | 0,001074917 | 0,364153199 | 0,655 | 0,479 | 1        | 3 | Cab39         |
| Rapgef1       | 0,001083779 | 0,396293802 | 0,707 | 0,54  | 1        | 3 | Rapgef1       |
| Pcdh12        | 0,001098048 | 0,382261641 | 0,431 | 0,23  | 1        | 3 | Pcdh12        |
| Cgnl1         | 0,001101658 | 0,284972747 | 0,483 | 0,275 | 1        | 3 | Cgnl1         |
| Apbb2         | 0,001107668 | 0,350592752 | 0,793 | 0,555 | 1        | 3 | Apbb2         |
| Ctsl          | 0,001133371 | 0,379948332 | 0,931 | 0,879 | 1        | 3 | Ctsl          |
| Nos31         | 0,001141743 | 0,268868625 | 0,81  | 0,547 | 1        | 3 | Nos3          |
| Eif4ebp11     | 0,001225365 | 0,396275632 | 0,793 | 0,668 | 1        | 3 | Eif4ebp1      |
| Smtn1         | 0,001228176 | 0,339102774 | 0,793 | 0,54  | 1        | 3 | Smtn          |
| Tex2          | 0,001242305 | 0,348890717 | 0,362 | 0,177 | 1        | 3 | Tex2          |
| Aldoa1        | 0,001262816 | 0,306311441 | 0,948 | 0,958 | 1        | 3 | Aldoa         |
| Eccr2         | 0,001278057 | 0,368761622 | 0,966 | 0,679 | 1        | 3 | Eccr          |
| Pmepa11       | 0,001326507 | 0,301137701 | 0,724 | 0,558 | 1        | 3 | Pmepa1        |
| Dpysl2        | 0,001450044 | 0,438183477 | 0,897 | 0,804 | 1        | 3 | Dpysl2        |
| Nes1          | 0,001490347 | 0,288065634 | 0,534 | 0,321 | 1        | 3 | Nes           |
| Fkbp101       | 0,001503805 | 0,325568774 | 0,69  | 0,445 | 1        | 3 | Fkbp10        |
| Notch11       | 0,001534654 | 0,282516187 | 0,759 | 0,66  | 1        | 3 | Notch1        |
| Bnip3l        | 0,001573063 | 0,39230095  | 0,759 | 0,615 | 1        | 3 | Bnip3l        |
| Pear1         | 0,001583851 | 0,371427981 | 0,466 | 0,264 | 1        | 3 | Pear1         |
| Tax1bp31      | 0,00162776  | 0,407033562 | 0,828 | 0,725 | 1        | 3 | Tax1bp3       |
| Mpdz          | 0,001689672 | 0,289325579 | 0,276 | 0,125 | 1        | 3 | Mpdz          |
| Zdhhc20       | 0,001735884 | 0,399607297 | 0,793 | 0,668 | 1        | 3 | Zdhhc20       |
| Nfib          | 0,001813381 | 0,344254162 | 0,828 | 0,577 | 1        | 3 | Nfib          |
| Tspan14       | 0,001838071 | 0,428666983 | 0,69  | 0,566 | 1        | 3 | Tspan14       |
| Pde4d         | 0,001852124 | 0,267564727 | 0,431 | 0,238 | 1        | 3 | Pde4d         |
| Ets2          | 0,001860973 | 0,628923639 | 0,793 | 0,668 | 1        | 3 | Ets2          |
| Lmna          | 0,001930236 | 0,391904439 | 0,828 | 0,702 | 1        | 3 | Lmna          |
| Myadm1        | 0,001945166 | 0,274220634 | 0,897 | 0,74  | 1        | 3 | Myadm         |
| Picb4         | 0,002011766 | 0,293087297 | 0,414 | 0,234 | 1        | 3 | Picb4         |
| Tes1          | 0,002038068 | 0,269651113 | 0,862 | 0,691 | 1        | 3 | Tes           |
| F2r131        | 0,00217384  | 0,294260582 | 0,293 | 0,132 | 1        | 3 | F2r13         |
| Bcl2l111      | 0,002209318 | 0,318354077 | 0,414 | 0,234 | 1        | 3 | Bcl2l11       |
| Sympo1        | 0,002255859 | 0,301748759 | 0,707 | 0,464 | 1        | 3 | Sympo         |
| Trib2         | 0,002263953 | 0,379135638 | 0,414 | 0,223 | 1        | 3 | Trib2         |
| Elk31         | 0,002313529 | 0,308299249 | 0,914 | 0,8   | 1        | 3 | Elk3          |
| Kif5b         | 0,002348049 | 0,369527302 | 0,862 | 0,74  | 1        | 3 | Kif5b         |
| Lxn1          | 0,002362752 | 0,278122501 | 0,776 | 0,608 | 1        | 3 | Lxn           |
| Tet3          | 0,00236872  | 0,350991983 | 0,466 | 0,298 | 1        | 3 | Tet3          |
| Lrrc8c1       | 0,002424881 | 0,27194102  | 0,828 | 0,57  | 1        | 3 | Lrrc8c        |
| Map4          | 0,002490074 | 0,30531265  | 0,707 | 0,608 | 1        | 3 | Map4          |
| Sh3tc1        | 0,002578883 | 0,291163494 | 0,414 | 0,226 | 1        | 3 | Sh3tc1        |
| Rnd3          | 0,002592621 | 0,335827562 | 0,31  | 0,151 | 1        | 3 | Rnd3          |
| Bag3          | 0,002748816 | 0,290495021 | 0,517 | 0,355 | 1        | 3 | Bag3          |
| Chst71        | 0,002754489 | 0,540510176 | 0,31  | 0,155 | 1        | 3 | Chst7         |
| Cd1091        | 0,002940072 | 0,336980259 | 0,603 | 0,4   | 1        | 3 | Cd109         |
| Rapgef5       | 0,002971746 | 0,390590744 | 0,741 | 0,547 | 1        | 3 | Rapgef5       |
| Smad4         | 0,003070981 | 0,352269932 | 0,414 | 0,242 | 1        | 3 | Smad4         |
| Eno11         | 0,0031242   | 0,354367117 | 0,966 | 0,928 | 1        | 3 | Eno1          |
| Sh3bp5        | 0,003188319 | 0,299779994 | 0,621 | 0,4   | 1        | 3 | Sh3bp5        |
| Plat1         | 0,00319656  | 0,508113893 | 0,569 | 0,374 | 1        | 3 | Plat          |
| Fzd41         | 0,003246114 | 0,36272458  | 0,655 | 0,464 | 1        | 3 | Fzd4          |
| Ptp4a31       | 0,003380654 | 0,404581999 | 0,707 | 0,592 | 1        | 3 | Ptp4a3        |
| Srp54a        | 0,003459275 | 0,297699677 | 0,724 | 0,608 | 1        | 3 | Srp54a        |
| Igfbp41       | 0,003482129 | 0,427392857 | 0,828 | 0,774 | 1        | 3 | Igfbp4        |
| Hilpda        | 0,003564763 | 0,479749658 | 0,466 | 0,309 | 1        | 3 | Hilpda        |
| Fam102b       | 0,003828728 | 0,318660427 | 0,362 | 0,189 | 1        | 3 | Fam102b       |
| Sept9         | 0,003876296 | 0,50169177  | 0,724 | 0,687 | 1        | 3 | Sept9         |
| Sept7         | 0,004060394 | 0,276601652 | 0,914 | 0,774 | 1        | 3 | Sept7         |
| Tnfrap811     | 0,004072692 | 0,303362059 | 0,517 | 0,309 | 1        | 3 | Tnfrap81      |
| Eif2s3x       | 0,004131063 | 0,393082136 | 0,569 | 0,438 | 1        | 3 | Eif2s3x       |
| Abhd17b       | 0,004167875 | 0,315320661 | 0,414 | 0,238 | 1        | 3 | Abhd17b       |
| Tmed3         | 0,004190276 | 0,354403726 | 0,569 | 0,411 | 1        | 3 | Tmed3         |
| Spry4         | 0,004228872 | 0,366766871 | 0,431 | 0,257 | 1        | 3 | Spry4         |
| Cds2          | 0,004230396 | 0,25458473  | 0,621 | 0,438 | 1        | 3 | Cds2          |
| Arhgap311     | 0,004367297 | 0,278810944 | 0,759 | 0,574 | 1        | 3 | Arhgap31      |
| Dock61        | 0,004402664 | 0,314318685 | 0,586 | 0,377 | 1        | 3 | Dock6         |
| Nckap1        | 0,004606661 | 0,330338966 | 0,621 | 0,411 | 1        | 3 | Nckap1        |
| 2810403A07Rik | 0,004719022 | 0,256123028 | 0,741 | 0,543 | 1        | 3 | 2810403A07Rik |
| Fam63b        | 0,004769266 | 0,252595345 | 0,466 | 0,294 | 1        | 3 | Fam63b        |
| Nol4l         | 0,004857328 | 0,489743887 | 0,466 | 0,325 | 1        | 3 | Nol4l         |
| Gnb11         | 0,004899326 | 0,264829844 | 1     | 0,996 | 1        | 3 | Gnb1          |
| Zfc3h1        | 0,004907091 | 0,287839724 | 0,397 | 0,238 | 1        | 3 | Zfc3h1        |
| Higd1a        | 0,004941721 | 0,367323532 | 0,759 | 0,649 | 1        | 3 | Higd1a        |
| Tns1          | 0,004980424 | 0,292436637 | 0,638 | 0,445 | 1        | 3 | Tns1          |
| Slc23a2       | 0,005060104 | 0,319457436 | 0,517 | 0,343 | 1        | 3 | Slc23a2       |
| Sh2d3c1       | 0,00516631  | 0,338882456 | 0,793 | 0,574 | 1        | 3 | Sh2d3c        |
| Atp2b4        | 0,005185612 | 0,270015404 | 0,362 | 0,223 | 1        | 3 | Atp2b4        |
| Magi1         | 0,005295225 | 0,337581505 | 0,379 | 0,226 | 1        | 3 | Magi1         |
| S100a10       | 0,005337662 | 0,349838029 | 0,845 | 0,74  | 1        | 3 | S100a10       |
| Endod1        | 0,005411465 | 0,315389151 | 0,707 | 0,528 | 1        | 3 | Endod1        |
| Grhpr         | 0,005450773 | 0,34089466  | 0,276 | 0,136 | 1        | 3 | Grhpr         |
| Ankrd46       | 0,005759027 | 0,336810756 | 0,362 | 0,204 | 1        | 3 | Ankrd46       |
| Myzap         | 0,005805447 | 0,327854074 | 0,534 | 0,362 | 1        | 3 | Myzap         |
| Syp1          | 0,006162549 | 0,312606564 | 0,845 | 0,634 | 1        | 3 | Syp1          |
| Sec31a        | 0,00617988  | 0,256740923 | 0,672 | 0,494 | 1        | 3 | Sec31a        |
| Mgll          | 0,006417103 | 0,276450013 | 0,345 | 0,185 | 1        | 3 | Mgll          |
| Lnx2          | 0,006487352 | 0,278718525 | 0,345 | 0,196 | 1        | 3 | Lnx2          |
| Dock1         | 0,006761869 | 0,36372258  | 0,621 | 0,494 | 1        | 3 | Dock1         |
| St8sia4       | 0,006938461 | 0,407663635 | 0,483 | 0,34  | 1        | 3 | St8sia4       |
| Pink1         | 0,00700386  | 0,290357012 | 0,534 | 0,404 | 1        | 3 | Pink1         |
| Apaf1         | 0,007198136 | 0,271328609 | 0,397 | 0,234 | 1        | 3 | Apaf1         |
| Taok1         | 0,007535507 | 0,381840199 | 0,655 | 0,475 | 1        | 3 | Taok1         |
| Dnajc18       | 0,00765824  | 0,272186117 | 0,362 | 0,204 | 1        | 3 | Dnajc18       |
| Ywhah         | 0,007690824 | 0,373322975 | 0,897 | 0,875 | 1        | 3 | Ywhah         |
| Spry1         | 0,007745054 | 0,323670878 | 0,362 | 0,208 | 1        | 3 | Spry1         |
| Asap1         | 0,007810466 | 0,359740282 | 0,569 | 0,434 | 1        | 3 | Asap1         |
| Stx2          | 0,007858203 | 0,434358597 | 0,552 | 0,426 | 1        | 3 | Stx2          |
| Limch11       | 0,008196317 | 0,308569088 | 0,431 | 0,272 | 1        | 3 | Limch1        |
| Slc35g2       | 0,008244252 | 0,305152035 | 0,31  | 0,158 | 1        | 3 | Slc35g2       |
| Gng12         | 0,008536954 | 0,321492636 | 0,741 | 0,596 | 1        | 3 | Gng12         |
| Hkl1          | 0,008603847 | 0,288725874 | 0,552 | 0,392 | 1        | 3 | Hkl1          |
| Clic41        | 0,008854345 | 0,280210938 | 0,897 | 0,842 | 1        | 3 | Clic4         |
| Ddah21        | 0,009343444 | 0,270194143 | 0,569 | 0,443 | 1        | 3 | Ddah2         |
| CTO10467.1    | 0,009814881 | 0,282403316 | 1     | 1     | 1        | 3 | CTO10467.1    |
| Tgoin1        | 0,009841817 | 0,363091357 | 0,621 | 0,491 | 1        | 3 | Tgoin1        |
| Adrg3         | 0,009901968 | 0,456801486 | 0,345 | 0,189 | 1        | 3 | Adrg3         |
| Pbk           | 3,21E-37    | 1,269710446 | 0,808 | 0,037 | 5,09E-33 | 4 | Pbk           |
| Ube2c         | 1,12E-33    | 1,525661484 | 0,846 | 0,057 | 1,77E-29 | 4 | Ube2c         |
| Kif4          | 4,75E-33    | 0,832240641 | 0,654 | 0,02  | 7,53E-29 | 4 | Kif4          |
| Bub1          | 1,02E-31    | 1,01445025  | 0,692 | 0,03  | 1,61E-27 | 4 | Bub1          |
| Prc1          | 1,89E-31    | 1,38620898  | 0,769 | 0,047 | 2,99E-27 | 4 | Prc1          |
| Hmnr          | 1,31E-29    | 0,932048556 | 0,615 | 0,024 | 2,07E-25 | 4 | Hmnr          |
| Fam64a        | 6,72E-29    | 1,002942037 | 0,654 | 0,034 | 1,07E-24 | 4 | Fam64a        |
| Top2a         | 8,27E-29    | 1,667162445 | 0,846 | 0,077 | 1,31E-24 | 4 | Top2a         |
| Cep55         | 1,07E-28    | 1,001202466 | 0,654 | 0,034 | 1,69E-24 | 4 | Cep55         |
| Kif22         | 2,80E-28    | 1,452274372 | 0,808 | 0,074 | 4,43E-24 | 4 | Kif22         |

|                |          |             |       |       |          |   |                |
|----------------|----------|-------------|-------|-------|----------|---|----------------|
| Birc5          | 3,40E-28 | 1,478725718 | 0,962 | 0,125 | 5,38E-24 | 4 | Birc5          |
| Ccna2          | 4,26E-28 | 1,423895551 | 0,846 | 0,084 | 6,76E-24 | 4 | Ccna2          |
| Bub1b          | 4,79E-28 | 1,01170232  | 0,692 | 0,04  | 7,59E-24 | 4 | Bub1b          |
| Cdca8          | 9,49E-28 | 1,061920837 | 0,808 | 0,071 | 1,50E-23 | 4 | Cdca8          |
| Sgol1          | 1,22E-25 | 0,406791901 | 0,538 | 0,02  | 1,94E-21 | 4 | Sgol1          |
| Foxm1          | 1,64E-25 | 0,36970371  | 0,731 | 0,054 | 2,59E-21 | 4 | Foxm1          |
| Ska1           | 1,84E-25 | 0,710366291 | 0,577 | 0,027 | 2,91E-21 | 4 | Ska1           |
| Nusap1         | 2,54E-24 | 1,250959781 | 0,692 | 0,061 | 4,03E-20 | 4 | Nusap1         |
| Pclaf          | 5,46E-24 | 1,283233822 | 0,846 | 0,104 | 8,66E-20 | 4 | Pclaf          |
| Gtse1          | 5,56E-24 | 0,332274009 | 0,615 | 0,037 | 8,81E-20 | 4 | Gtse1          |
| Ncapd2         | 6,06E-24 | 0,903172408 | 0,846 | 0,104 | 9,61E-20 | 4 | Ncapd2         |
| Smc2           | 9,01E-24 | 1,392430413 | 0,962 | 0,155 | 1,43E-19 | 4 | Smc2           |
| Esco2          | 2,23E-23 | 0,435580149 | 0,5   | 0,02  | 3,53E-19 | 4 | Esco2          |
| Mki67          | 3,84E-23 | 1,551404858 | 0,846 | 0,111 | 6,09E-19 | 4 | Mki67          |
| Cdk1           | 6,79E-23 | 1,643562807 | 0,923 | 0,158 | 1,08E-18 | 4 | Cdk1           |
| Mastl          | 2,88E-22 | 0,634122042 | 0,577 | 0,04  | 4,56E-18 | 4 | Mastl          |
| Ccnb1          | 7,19E-22 | 1,268324015 | 0,654 | 0,057 | 1,14E-17 | 4 | Ccnb1          |
| Rad51          | 8,62E-22 | 0,809118367 | 0,615 | 0,047 | 1,37E-17 | 4 | Rad51          |
| Hist1h1b       | 8,65E-22 | 0,5182486   | 0,538 | 0,034 | 1,37E-17 | 4 | Hist1h1b       |
| Kcap2l         | 1,26E-21 | 0,883147164 | 0,654 | 0,057 | 1,99E-17 | 4 | Kcap2l         |
| Cdc20          | 1,36E-21 | 1,445883981 | 0,692 | 0,071 | 2,15E-17 | 4 | Cdc20          |
| Cenpq          | 2,75E-21 | 0,940303482 | 0,692 | 0,071 | 4,36E-17 | 4 | Cenpq          |
| Racgap1        | 4,82E-21 | 1,151625755 | 0,769 | 0,101 | 7,64E-17 | 4 | Racgap1        |
| Cenpe          | 5,24E-21 | 0,930164371 | 0,615 | 0,051 | 8,31E-17 | 4 | Cenpe          |
| Rrm2           | 6,94E-21 | 1,487023673 | 0,731 | 0,088 | 1,10E-16 | 4 | Rrm2           |
| Gm15452        | 9,24E-21 | 0,304126414 | 0,846 | 0,152 | 1,46E-16 | 4 | Gm15452        |
| Anln           | 9,56E-21 | 0,811562746 | 0,692 | 0,074 | 1,51E-16 | 4 | Anln           |
| Cdca5          | 1,04E-20 | 0,662803118 | 0,5   | 0,027 | 1,65E-16 | 4 | Cdca5          |
| Tacc3          | 1,11E-20 | 1,028113113 | 0,769 | 0,104 | 1,76E-16 | 4 | Tacc3          |
| Nuf2           | 1,47E-20 | 0,728976062 | 0,538 | 0,037 | 2,34E-16 | 4 | Nuf2           |
| Mis18bp1       | 2,15E-20 | 1,057098114 | 0,5   | 0,03  | 3,41E-16 | 4 | Mis18bp1       |
| Kcap2          | 2,49E-20 | 1,138358823 | 0,692 | 0,081 | 3,95E-16 | 4 | Kcap2          |
| Melk           | 3,33E-20 | 0,832611343 | 0,462 | 0,024 | 5,28E-16 | 4 | Melk           |
| Kif20b         | 3,52E-20 | 0,684130263 | 0,577 | 0,044 | 5,58E-16 | 4 | Kif20b         |
| Cenpw          | 3,65E-20 | 0,399875956 | 0,885 | 0,141 | 5,79E-16 | 4 | Cenpw          |
| Depdc1a        | 3,98E-20 | 0,658023772 | 0,423 | 0,017 | 6,31E-16 | 4 | Depdc1a        |
| Sapcd2         | 6,83E-20 | 0,421673576 | 0,423 | 0,017 | 1,08E-15 | 4 | Sapcd2         |
| Cks2           | 1,46E-19 | 1,007286954 | 0,885 | 0,205 | 2,31E-15 | 4 | Cks2           |
| Aspm           | 2,39E-19 | 0,483630971 | 0,5   | 0,03  | 3,79E-15 | 4 | Aspm           |
| Cdca2          | 2,94E-19 | 0,588538092 | 0,538 | 0,04  | 4,66E-15 | 4 | Cdca2          |
| Cenpf          | 2,99E-19 | 1,250365416 | 0,615 | 0,067 | 4,73E-15 | 4 | Cenpf          |
| Diaph3         | 6,50E-19 | 0,35645805  | 0,615 | 0,061 | 1,03E-14 | 4 | Diaph3         |
| H2afx          | 9,18E-19 | 1,310240662 | 0,962 | 0,249 | 1,46E-14 | 4 | H2afx          |
| Shcbp1         | 9,57E-19 | 0,923034978 | 0,577 | 0,057 | 1,52E-14 | 4 | Shcbp1         |
| Gm44346        | 1,05E-18 | 0,547028278 | 0,885 | 0,189 | 1,66E-14 | 4 | Gm44346        |
| Neil3          | 1,13E-18 | 0,717101947 | 0,5   | 0,037 | 1,79E-14 | 4 | Neil3          |
| Hist2h3c2      | 1,18E-18 | 0,265532945 | 0,5   | 0,037 | 1,87E-14 | 4 | Hist2h3c2      |
| Kif15          | 1,27E-18 | 0,636665048 | 0,538 | 0,044 | 2,02E-14 | 4 | Kif15          |
| Tk1            | 1,50E-18 | 1,141687722 | 0,846 | 0,155 | 2,37E-14 | 4 | Tk1            |
| Kif20a         | 1,64E-18 | 0,90245883  | 0,692 | 0,091 | 2,60E-14 | 4 | Kif20a         |
| Cdca3l         | 1,97E-18 | 0,66965847  | 0,769 | 0,101 | 3,12E-14 | 4 | Cdca3l         |
| Spc25          | 2,05E-18 | 0,978054555 | 0,692 | 0,098 | 3,25E-14 | 4 | Spc25          |
| Hist1h2ae      | 3,34E-18 | 0,622840972 | 0,538 | 0,047 | 5,30E-14 | 4 | Hist1h2ae      |
| Plk1           | 3,59E-18 | 0,944143814 | 0,5   | 0,037 | 5,69E-14 | 4 | Plk1           |
| Hist1h2ap      | 8,53E-18 | 2,399714515 | 0,769 | 0,141 | 1,35E-13 | 4 | Hist1h2ap      |
| Prr11          | 8,60E-18 | 0,330938653 | 0,423 | 0,024 | 1,36E-13 | 4 | Prr11          |
| Kif11          | 9,86E-18 | 0,758370748 | 0,654 | 0,084 | 1,56E-13 | 4 | Kif11          |
| Kif23          | 1,23E-17 | 0,96629397  | 0,577 | 0,061 | 1,95E-13 | 4 | Kif23          |
| Gen1           | 1,26E-17 | 0,570386356 | 0,423 | 0,024 | 2,00E-13 | 4 | Gen1           |
| Ube2t          | 1,85E-17 | 0,603181895 | 0,423 | 0,024 | 2,93E-13 | 4 | Ube2t          |
| Plk4           | 3,93E-17 | 0,828775251 | 0,692 | 0,101 | 6,22E-13 | 4 | Plk4           |
| Stmn1          | 4,41E-17 | 1,469048631 | 1     | 0,38  | 6,99E-13 | 4 | Stmn1          |
| Mxd3           | 5,43E-17 | 0,66924051  | 0,731 | 0,141 | 8,60E-13 | 4 | Mxd3           |
| Ect2           | 7,08E-17 | 0,606030735 | 0,423 | 0,027 | 1,12E-12 | 4 | Ect2           |
| Asf1b          | 7,95E-17 | 0,694388822 | 0,654 | 0,084 | 1,26E-12 | 4 | Asf1b          |
| Cdc25c         | 1,33E-16 | 0,303139035 | 0,346 | 0,013 | 2,11E-12 | 4 | Cdc25c         |
| Knl1           | 1,63E-16 | 0,490644218 | 0,5   | 0,044 | 2,58E-12 | 4 | Knl1           |
| Fam83d         | 1,65E-16 | 0,649122812 | 0,346 | 0,013 | 2,61E-12 | 4 | Fam83d         |
| Spag5          | 1,67E-16 | 0,304234281 | 0,423 | 0,027 | 2,65E-12 | 4 | Spag5          |
| Iggap3         | 2,01E-16 | 0,715603075 | 0,615 | 0,077 | 3,18E-12 | 4 | Iggap3         |
| Ccnb2          | 2,42E-16 | 1,167869659 | 0,769 | 0,138 | 3,84E-12 | 4 | Ccnb2          |
| Tmpo           | 2,91E-16 | 1,294744956 | 0,923 | 0,246 | 4,61E-12 | 4 | Tmpo           |
| Knstrn         | 3,81E-16 | 0,727992106 | 0,615 | 0,077 | 6,05E-12 | 4 | Knstrn         |
| Hist2h3b       | 4,44E-16 | 0,505354075 | 0,538 | 0,061 | 7,03E-12 | 4 | Hist2h3b       |
| Tyms           | 9,19E-16 | 1,228054569 | 0,923 | 0,279 | 1,46E-11 | 4 | Tyms           |
| Tpx2           | 1,02E-15 | 0,95568362  | 0,692 | 0,114 | 1,61E-11 | 4 | Tpx2           |
| Nek2           | 1,11E-15 | 0,723696851 | 0,423 | 0,03  | 1,77E-11 | 4 | Nek2           |
| Ncaph          | 2,11E-15 | 0,920147008 | 0,692 | 0,111 | 3,35E-11 | 4 | Ncaph          |
| Aurkb          | 2,88E-15 | 0,722936134 | 0,5   | 0,051 | 4,57E-11 | 4 | Aurkb          |
| Cenpa          | 3,60E-15 | 1,13029627  | 0,731 | 0,148 | 5,71E-11 | 4 | Cenpa          |
| Ndc80          | 4,18E-15 | 0,604995604 | 0,577 | 0,074 | 6,62E-11 | 4 | Ndc80          |
| AC153546.1     | 6,26E-15 | 1,108688914 | 1     | 0,411 | 9,93E-11 | 4 | AC153546.1     |
| Tuba1b         | 7,32E-15 | 1,483416472 | 1     | 0,825 | 1,16E-10 | 4 | Tuba1b         |
| Aurka          | 1,11E-14 | 0,911676968 | 0,462 | 0,044 | 1,77E-10 | 4 | Aurka          |
| Uhrf1          | 1,58E-14 | 0,631182053 | 0,731 | 0,135 | 2,51E-10 | 4 | Uhrf1          |
| Trim59         | 1,90E-14 | 0,610409404 | 0,538 | 0,071 | 3,01E-10 | 4 | Trim59         |
| Ncapp21        | 1,95E-14 | 0,485939196 | 0,769 | 0,138 | 3,09E-10 | 4 | Ncapp21        |
| C330027C09Rik  | 2,01E-14 | 0,483674735 | 0,423 | 0,037 | 3,19E-10 | 4 | C330027C09Rik  |
| Ska3           | 2,64E-14 | 0,723338712 | 0,423 | 0,037 | 4,19E-10 | 4 | Ska3           |
| Smc4           | 2,85E-14 | 0,92828622  | 0,962 | 0,303 | 4,51E-10 | 4 | Smc4           |
| Sgol2a         | 3,35E-14 | 0,674300786 | 0,538 | 0,071 | 5,31E-10 | 4 | Sgol2a         |
| Z700099C18Rik  | 4,37E-14 | 0,386862666 | 0,423 | 0,037 | 6,92E-10 | 4 | Z700099C18Rik  |
| Cenpl          | 5,50E-14 | 0,546665018 | 0,423 | 0,037 | 8,72E-10 | 4 | Cenpl          |
| Phgdh          | 5,81E-14 | 1,044926619 | 0,462 | 0,051 | 9,21E-10 | 4 | Phgdh          |
| Hmgb2          | 6,07E-14 | 1,166247407 | 1     | 0,481 | 9,63E-10 | 4 | Hmgb2          |
| Stil           | 8,16E-14 | 0,419650351 | 0,385 | 0,03  | 1,29E-09 | 4 | Stil           |
| Tubb5          | 1,18E-13 | 1,243625236 | 1     | 0,963 | 1,87E-09 | 4 | Tubb5          |
| Kif2c          | 1,84E-13 | 0,641907486 | 0,346 | 0,024 | 2,92E-09 | 4 | Kif2c          |
| Hmgn2          | 1,93E-13 | 1,340366955 | 1     | 0,751 | 3,06E-09 | 4 | Hmgn2          |
| Pif1           | 2,04E-13 | 0,37839855  | 0,269 | 0,01  | 3,23E-09 | 4 | Pif1           |
| Cenpm          | 2,19E-13 | 0,453523313 | 0,538 | 0,071 | 3,47E-09 | 4 | Cenpm          |
| H2afz          | 6,09E-13 | 1,218802222 | 1     | 0,862 | 9,66E-09 | 4 | H2afz          |
| Pkmyt1         | 7,01E-13 | 0,410437798 | 0,577 | 0,088 | 1,11E-08 | 4 | Pkmyt1         |
| Spc24          | 7,39E-13 | 0,832891789 | 0,615 | 0,118 | 1,17E-08 | 4 | Spc24          |
| Traip          | 7,97E-13 | 0,280981174 | 0,308 | 0,017 | 1,26E-08 | 4 | Traip          |
| Hmgb3          | 1,54E-12 | 0,923106567 | 0,885 | 0,283 | 2,45E-08 | 4 | Hmgb3          |
| Cdc34          | 2,51E-12 | 0,575517539 | 0,692 | 0,155 | 3,98E-08 | 4 | Cdc34          |
| Mad2l1         | 3,43E-12 | 0,721640359 | 0,692 | 0,141 | 5,44E-08 | 4 | Mad2l1         |
| Z1700066M21Rik | 3,50E-12 | 0,287364314 | 0,346 | 0,027 | 5,56E-08 | 4 | Z1700066M21Rik |
| Cenpi          | 4,03E-12 | 0,414876992 | 0,385 | 0,037 | 6,39E-08 | 4 | Cenpi          |
| Cks1b          | 4,95E-12 | 0,930532596 | 0,846 | 0,286 | 7,84E-08 | 4 | Cks1b          |
| E2f7           | 5,49E-12 | 0,473927396 | 0,577 | 0,104 | 8,70E-08 | 4 | E2f7           |
| Wdr62          | 7,18E-12 | 0,489063553 | 0,385 | 0,037 | 1,14E-07 | 4 | Wdr62          |
| Cit            | 7,26E-12 | 0,307331805 | 0,654 | 0,135 | 1,15E-07 | 4 | Cit            |
| Kpna2          | 7,64E-12 | 1,577052896 | 0,808 | 0,276 | 1,21E-07 | 4 | Kpna2          |
| Rrm1           | 9,40E-12 | 0,973829217 | 0,808 | 0,219 | 1,49E-07 | 4 | Rrm1           |
| Usp1           | 1,35E-11 | 0,664820092 | 0,692 | 0,158 | 2,14E-07 | 4 | Usp1           |
| Trip13         | 1,92E-11 | 0,342248934 | 0,385 | 0,04  | 3,04E-07 | 4 | Trip13         |
| Gm15387        | 2,95E-11 | 0,779180568 | 1     | 0,872 | 4,68E-07 | 4 | Gm15387        |
| Zwilch         | 3,62E-11 | 0,258900111 | 0,346 | 0,03  | 5,73E-07 | 4 | Zwilch         |
| Troap          | 4,20E-11 | 0,285653281 | 0,385 | 0,04  | 6,66E-07 | 4 | Troap          |

|               |          |             |       |       |             |   |               |
|---------------|----------|-------------|-------|-------|-------------|---|---------------|
| Gm10282       | 4,24E-11 | 0,638447306 | 0,962 | 0,613 | 6,72E-07    | 4 | Gm10282       |
| Rangap1       | 4,56E-11 | 0,705105789 | 0,692 | 0,165 | 7,23E-07    | 4 | Rangap1       |
| Incenp1       | 4,83E-11 | 0,331255745 | 0,654 | 0,125 | 7,65E-07    | 4 | Incenp1       |
| Dek           | 6,82E-11 | 1,118746785 | 0,962 | 0,572 | 1,08E-06    | 4 | Dek           |
| Cdkn2c        | 8,46E-11 | 0,496338592 | 0,538 | 0,094 | 1,34E-06    | 4 | Cdkn2c        |
| Lin9          | 1,18E-10 | 0,438373827 | 0,385 | 0,047 | 1,87E-06    | 4 | Lin9          |
| Nucks1        | 1,38E-10 | 0,664779679 | 1     | 0,421 | 2,18E-06    | 4 | Nucks1        |
| Tubb4b        | 1,72E-10 | 1,140108372 | 0,962 | 0,532 | 2,73E-06    | 4 | Tubb4b        |
| Ttk           | 2,47E-10 | 0,398857616 | 0,308 | 0,027 | 3,92E-06    | 4 | Ttk           |
| Ccnf          | 2,53E-10 | 0,450320176 | 0,346 | 0,037 | 4,00E-06    | 4 | Ccnf          |
| Bora          | 2,76E-10 | 0,379170224 | 0,5   | 0,084 | 4,37E-06    | 4 | Bora          |
| Kcap5         | 2,92E-10 | 0,650632723 | 0,769 | 0,209 | 4,63E-06    | 4 | Kcap5         |
| Ncapg         | 3,45E-10 | 0,581105125 | 0,462 | 0,077 | 5,47E-06    | 4 | Ncapg         |
| Phf19         | 3,59E-10 | 0,294042319 | 0,269 | 0,02  | 5,69E-06    | 4 | Phf19         |
| Katnbl1       | 3,93E-10 | 0,61488563  | 0,654 | 0,158 | 6,22E-06    | 4 | Katnbl1       |
| Prim1         | 4,00E-10 | 0,496564708 | 0,5   | 0,088 | 6,35E-06    | 4 | Prim1         |
| Cbx5          | 5,16E-10 | 0,726183632 | 0,731 | 0,195 | 8,18E-06    | 4 | Cbx5          |
| Ulbp1         | 5,58E-10 | 0,436158317 | 0,538 | 0,101 | 8,85E-06    | 4 | Ulbp1         |
| Gm10184       | 6,81E-10 | 0,463597121 | 0,538 | 0,118 | 1,08E-05    | 4 | Gm10184       |
| Cdc25b        | 8,03E-10 | 0,383233594 | 0,346 | 0,04  | 1,27E-05    | 4 | Cdc25b        |
| Mcm2          | 9,71E-10 | 0,845001077 | 0,654 | 0,162 | 1,54E-05    | 4 | Mcm2          |
| Fbxo5         | 1,07E-09 | 0,635077427 | 0,308 | 0,03  | 1,70E-05    | 4 | Fbxo5         |
| Ptma          | 1,28E-09 | 0,639702691 | 1     | 0,99  | 2,03E-05    | 4 | Ptma          |
| Ska2          | 1,31E-09 | 0,277888466 | 0,538 | 0,098 | 2,07E-05    | 4 | Ska2          |
| Pole          | 1,31E-09 | 0,375641398 | 0,385 | 0,051 | 2,07E-05    | 4 | Pole          |
| Haus6         | 1,38E-09 | 0,441428499 | 0,462 | 0,077 | 2,19E-05    | 4 | Haus6         |
| Dbf4          | 1,48E-09 | 0,343602866 | 0,615 | 0,138 | 2,34E-05    | 4 | Dbf4          |
| Dnajc9        | 1,50E-09 | 0,702340808 | 0,615 | 0,152 | 2,39E-05    | 4 | Dnajc9        |
| Hmgbl1        | 2,03E-09 | 0,71949138  | 1     | 0,953 | 3,22E-05    | 4 | Hmgbl1        |
| Rfc5          | 2,63E-09 | 0,704570181 | 0,577 | 0,135 | 4,17E-05    | 4 | Rfc5          |
| Ncapd3        | 3,03E-09 | 0,616941391 | 0,615 | 0,162 | 4,81E-05    | 4 | Ncapd3        |
| Dlgap5        | 3,34E-09 | 0,329967132 | 0,423 | 0,067 | 5,30E-05    | 4 | Dlgap5        |
| Apf           | 3,34E-09 | 0,318709548 | 0,423 | 0,067 | 5,30E-05    | 4 | Apf           |
| Caln2         | 3,61E-09 | 0,794629084 | 1     | 0,956 | 5,72E-05    | 4 | Caln2         |
| Sae1          | 3,89E-09 | 0,913062525 | 0,846 | 0,387 | 6,17E-05    | 4 | Sae1          |
| G2e3          | 4,24E-09 | 0,568742155 | 0,538 | 0,121 | 6,71E-05    | 4 | G2e3          |
| Fam111a       | 4,97E-09 | 0,555000718 | 0,692 | 0,195 | 7,87E-05    | 4 | Fam111a       |
| Cmc2          | 5,13E-09 | 0,325082507 | 0,577 | 0,135 | 8,14E-05    | 4 | Cmc2          |
| Hist1h4d      | 7,99E-09 | 0,429153174 | 0,654 | 0,189 | 0,000126717 | 4 | Hist1h4d      |
| Fen1          | 8,00E-09 | 0,669178921 | 0,577 | 0,145 | 0,000126816 | 4 | Fen1          |
| Gm21596       | 8,57E-09 | 0,523905108 | 1     | 0,818 | 0,000135843 | 4 | Gm21596       |
| D030056L22Rik | 9,52E-09 | 0,285061332 | 0,423 | 0,071 | 0,000150869 | 4 | D030056L22Rik |
| Gm10182       | 9,59E-09 | 0,269051803 | 0,846 | 0,505 | 0,000152053 | 4 | Gm10182       |
| Anp32b        | 9,93E-09 | 0,723577323 | 1     | 0,562 | 0,000157429 | 4 | Anp32b        |
| Tubg1         | 1,18E-08 | 0,821767419 | 0,615 | 0,182 | 0,000187579 | 4 | Tubg1         |
| Cenpn         | 1,33E-08 | 0,319375839 | 0,269 | 0,027 | 0,000211051 | 4 | Cenpn         |
| Cenph         | 1,42E-08 | 0,442774958 | 0,346 | 0,051 | 0,000224658 | 4 | Cenph         |
| Lmnb1         | 1,42E-08 | 0,399215627 | 0,423 | 0,074 | 0,000225106 | 4 | Lmnb1         |
| Ncl           | 1,59E-08 | 0,828180881 | 1     | 0,828 | 0,000251995 | 4 | Ncl           |
| Rfc4          | 1,68E-08 | 0,293665465 | 0,423 | 0,071 | 0,000266531 | 4 | Rfc4          |
| Erc6l         | 2,17E-08 | 0,251016055 | 0,269 | 0,027 | 0,000343933 | 4 | Erc6l         |
| Nup35         | 2,32E-08 | 0,416976506 | 0,462 | 0,094 | 0,00036805  | 4 | Nup35         |
| Ppa1          | 2,46E-08 | 0,535311028 | 0,654 | 0,182 | 0,00039011  | 4 | Ppa1          |
| Haus3         | 2,83E-08 | 0,37309893  | 0,462 | 0,091 | 0,000449116 | 4 | Haus3         |
| Rpa1          | 3,13E-08 | 0,734355602 | 0,731 | 0,232 | 0,000495757 | 4 | Rpa1          |
| Ran           | 3,72E-08 | 0,721700226 | 0,962 | 0,801 | 0,000589447 | 4 | Ran           |
| Tipin         | 3,73E-08 | 0,977828851 | 0,692 | 0,269 | 0,000591178 | 4 | Tipin         |
| Cep192        | 4,22E-08 | 0,368462114 | 0,577 | 0,141 | 0,000669087 | 4 | Cep192        |
| Tubb61        | 4,26E-08 | 0,916146969 | 0,962 | 0,721 | 0,000675327 | 4 | Tubb61        |
| Exo1          | 4,59E-08 | 0,39412967  | 0,269 | 0,03  | 0,00072748  | 4 | Exo1          |
| Anp32e        | 5,06E-08 | 0,712714411 | 0,731 | 0,32  | 0,000802813 | 4 | Anp32e        |
| Sifn9         | 5,54E-08 | 0,416107597 | 0,462 | 0,094 | 0,000878243 | 4 | Sifn9         |
| Tcf19         | 6,05E-08 | 0,748047094 | 0,5   | 0,114 | 0,000958678 | 4 | Tcf19         |
| Tfdp1         | 7,48E-08 | 0,700586407 | 0,769 | 0,296 | 0,001185197 | 4 | Tfdp1         |
| Cdc7          | 7,50E-08 | 0,460521844 | 0,346 | 0,054 | 0,001188398 | 4 | Cdc7          |
| Ccne1         | 7,70E-08 | 0,520768445 | 0,346 | 0,054 | 0,001219993 | 4 | Ccne1         |
| Mybl2         | 1,06E-07 | 0,358220062 | 0,308 | 0,044 | 0,001675062 | 4 | Mybl2         |
| Atad2         | 1,25E-07 | 0,48858619  | 0,538 | 0,128 | 0,001976058 | 4 | Atad2         |
| Uchl3         | 1,58E-07 | 0,57898849  | 0,731 | 0,279 | 0,002512012 | 4 | Uchl3         |
| Lig1          | 1,83E-07 | 0,702644314 | 0,615 | 0,205 | 0,00289698  | 4 | Lig1          |
| Arhgef39      | 1,86E-07 | 0,415187935 | 0,269 | 0,034 | 0,002951399 | 4 | Arhgef39      |
| Gm4617        | 2,53E-07 | 0,283484913 | 1     | 0,909 | 0,00403921  | 4 | Gm4617        |
| Brd8          | 3,18E-07 | 0,448883265 | 0,808 | 0,306 | 0,005041627 | 4 | Brd8          |
| Dnmt1         | 3,21E-07 | 0,535578319 | 0,615 | 0,205 | 0,005091902 | 4 | Dnmt1         |
| Ppia          | 3,53E-07 | 0,381666639 | 1     | 1     | 0,005588328 | 4 | Ppia          |
| Prim2         | 4,50E-07 | 0,596661314 | 0,423 | 0,098 | 0,007134256 | 4 | Prim2         |
| Pold1         | 4,54E-07 | 0,553074722 | 0,5   | 0,128 | 0,007198786 | 4 | Pold1         |
| Exosc8        | 4,71E-07 | 0,564256909 | 0,769 | 0,283 | 0,007459604 | 4 | Exosc8        |
| Nasp          | 4,77E-07 | 0,428814723 | 0,731 | 0,269 | 0,007562497 | 4 | Nasp          |
| Rad21         | 4,99E-07 | 0,523340154 | 0,846 | 0,384 | 0,007915625 | 4 | Rad21         |
| Adk           | 5,11E-07 | 0,287462961 | 0,462 | 0,111 | 0,008106769 | 4 | Adk           |
| Gm8203        | 5,42E-07 | 0,642127713 | 0,962 | 0,744 | 0,008586522 | 4 | Gm8203        |
| Cntn          | 8,23E-07 | 0,504729721 | 0,5   | 0,141 | 0,013049529 | 4 | Cntn          |
| Psat1         | 9,05E-07 | 0,565452006 | 0,385 | 0,081 | 0,014341541 | 4 | Psat1         |
| Cenpk         | 9,59E-07 | 0,314108334 | 0,308 | 0,051 | 0,01519965  | 4 | Cenpk         |
| Gm10123       | 1,11E-06 | 0,392234729 | 1     | 0,987 | 0,017533526 | 4 | Gm10123       |
| H1f0          | 1,16E-06 | 0,815045746 | 1     | 0,751 | 0,018453479 | 4 | H1f0          |
| Dut           | 1,43E-06 | 0,503888515 | 0,615 | 0,212 | 0,022605642 | 4 | Dut           |
| Odf2          | 1,53E-06 | 0,45954781  | 0,577 | 0,172 | 0,024198958 | 4 | Odf2          |
| Bhlhb9        | 1,58E-06 | 0,490160504 | 0,269 | 0,04  | 0,02498711  | 4 | Bhlhb9        |
| Brc2          | 1,62E-06 | 0,311029773 | 0,346 | 0,067 | 0,025614114 | 4 | Brc2          |
| Cenpc1        | 1,80E-06 | 0,322965201 | 0,423 | 0,098 | 0,028526902 | 4 | Cenpc1        |
| Gpsm2         | 1,80E-06 | 0,32091444  | 0,269 | 0,04  | 0,02857664  | 4 | Gpsm2         |
| Set           | 1,95E-06 | 0,816804128 | 1     | 0,828 | 0,030919391 | 4 | Set           |
| Cdkn2d        | 1,96E-06 | 0,58040359  | 0,462 | 0,128 | 0,031014249 | 4 | Cdkn2d        |
| Z810025M15Rik | 2,00E-06 | 0,526446039 | 0,846 | 0,424 | 0,031669295 | 4 | Z810025M15Rik |
| Ppih          | 2,39E-06 | 0,361961051 | 0,462 | 0,125 | 0,037818898 | 4 | Ppih          |
| Mettl14       | 3,07E-06 | 0,257688059 | 0,615 | 0,215 | 0,048644351 | 4 | Mettl14       |
| Myef2         | 3,17E-06 | 0,676979879 | 0,846 | 0,556 | 0,050323348 | 4 | Myef2         |
| Siva11        | 3,32E-06 | 0,350346364 | 0,577 | 0,195 | 0,052577635 | 4 | Siva11        |
| Tinag1        | 3,43E-06 | 0,41431365  | 0,615 | 0,189 | 0,054432595 | 4 | Tinag1        |
| Lmnb2         | 3,48E-06 | 0,472239852 | 0,385 | 0,088 | 0,055243977 | 4 | Lmnb2         |
| Dsn1          | 3,62E-06 | 0,342155673 | 0,269 | 0,044 | 0,057408545 | 4 | Dsn1          |
| Rpa3          | 3,65E-06 | 0,340361174 | 0,615 | 0,222 | 0,05793786  | 4 | Rpa3          |
| Rnd1          | 3,69E-06 | 0,308951376 | 0,385 | 0,088 | 0,058550056 | 4 | Rnd1          |
| Cep57         | 4,09E-06 | 0,486050595 | 0,577 | 0,199 | 0,064764541 | 4 | Cep57         |
| Sdpr1         | 4,19E-06 | 0,589268179 | 0,654 | 0,249 | 0,066457352 | 4 | Sdpr1         |
| Papd7         | 5,07E-06 | 0,339197896 | 0,385 | 0,094 | 0,080303336 | 4 | Papd7         |
| Hells         | 5,20E-06 | 0,317289822 | 0,5   | 0,145 | 0,082414181 | 4 | Hells         |
| Ube2s         | 5,73E-06 | 0,377991188 | 0,769 | 0,327 | 0,090786881 | 4 | Ube2s         |
| Rbbp7         | 5,99E-06 | 0,724985184 | 0,808 | 0,569 | 0,094961744 | 4 | Rbbp7         |
| Ppil1         | 6,07E-06 | 0,547546478 | 0,692 | 0,279 | 0,096270965 | 4 | Ppil1         |
| Tuba1c        | 6,10E-06 | 0,833093829 | 0,962 | 0,623 | 0,096707504 | 4 | Tuba1c        |
| Myh10         | 6,27E-06 | 0,521059837 | 0,769 | 0,354 | 0,09935838  | 4 | Myh10         |
| Ssrp1         | 6,37E-06 | 0,566264087 | 0,808 | 0,438 | 0,101032881 | 4 | Ssrp1         |
| Kpnb1         | 6,64E-06 | 0,505049791 | 0,923 | 0,535 | 0,105225033 | 4 | Kpnb1         |
| SIF1          | 6,91E-06 | 0,45842811  | 0,423 | 0,114 | 0,109599114 | 4 | SIF1          |
| E2f8          | 7,33E-06 | 0,583942341 | 0,269 | 0,047 | 0,116148312 | 4 | E2f8          |
| Hn1l          | 7,35E-06 | 0,91683137  | 0,769 | 0,468 | 0,116448316 | 4 | Hn1l          |
| Nop14         | 7,55E-06 | 0,406773681 | 0,462 | 0,138 | 0,11972018  | 4 | Nop14         |

|               |             |             |       |       |             |   |               |
|---------------|-------------|-------------|-------|-------|-------------|---|---------------|
| Pfdn1         | 7,89E-06    | 0,498098467 | 0,885 | 0,508 | 0,125055565 | 4 | Pfdn1         |
| Selenoh       | 8,38E-06    | 0,562693444 | 0,769 | 0,438 | 0,132865215 | 4 | Selenoh       |
| Donson        | 9,66E-06    | 0,535580749 | 0,423 | 0,128 | 0,153115175 | 4 | Donson        |
| Zfp367        | 1,01E-05    | 0,513407297 | 0,385 | 0,101 | 0,160164565 | 4 | Zfp367        |
| Gm10131       | 1,08E-05    | 0,409412711 | 0,962 | 0,768 | 0,171323289 | 4 | Gm10131       |
| Casp12        | 1,15E-05    | 0,314038287 | 0,5   | 0,145 | 0,18194618  | 4 | Casp12        |
| Hmgng1        | 1,18E-05    | 0,656858087 | 0,923 | 0,667 | 0,187459126 | 4 | Hmgng1        |
| Cdk5rap2      | 1,19E-05    | 0,382279663 | 0,423 | 0,125 | 0,188056088 | 4 | Cdk5rap2      |
| Tjp2          | 1,20E-05    | 0,546958966 | 0,577 | 0,212 | 0,190488284 | 4 | Tjp2          |
| Ppp1cb        | 1,23E-05    | 0,587600243 | 0,846 | 0,438 | 0,194645546 | 4 | Ppp1cb        |
| Arhgap11a     | 1,34E-05    | 0,26297295  | 0,346 | 0,081 | 0,21165257  | 4 | Arhgap11a     |
| Cep295        | 1,36E-05    | 0,254078243 | 0,5   | 0,148 | 0,21501547  | 4 | Cep295        |
| Hint1         | 1,40E-05    | 0,430294334 | 1     | 0,848 | 0,222536992 | 4 | Hint1         |
| Cnot9         | 1,43E-05    | 0,61995085  | 0,731 | 0,35  | 0,227301447 | 4 | Cnot9         |
| 4930579G24Rik | 1,48E-05    | 0,281283833 | 0,308 | 0,064 | 0,234003977 | 4 | 4930579G24Rik |
| Impdh2        | 1,48E-05    | 0,555583253 | 0,846 | 0,431 | 0,234860552 | 4 | Impdh2        |
| Ranbp1        | 1,54E-05    | 0,570451777 | 0,962 | 0,731 | 0,243524797 | 4 | Ranbp1        |
| Cep571        | 1,56E-05    | 0,370069344 | 0,269 | 0,051 | 0,247218398 | 4 | Cep571        |
| Rnaseh2b      | 1,57E-05    | 0,349690294 | 0,385 | 0,101 | 0,248173355 | 4 | Rnaseh2b      |
| Figl1         | 1,57E-05    | 0,377717708 | 0,308 | 0,064 | 0,248995714 | 4 | Figl1         |
| Gm28875       | 1,66E-05    | 0,396149089 | 0,577 | 0,209 | 0,263585626 | 4 | Gm28875       |
| Mcm4          | 1,67E-05    | 0,583308996 | 0,538 | 0,172 | 0,264808677 | 4 | Mcm4          |
| Slc43a3       | 1,75E-05    | 0,470707757 | 0,808 | 0,374 | 0,277433902 | 4 | Slc43a3       |
| Nup205        | 1,75E-05    | 0,27235962  | 0,5   | 0,145 | 0,27773758  | 4 | Nup205        |
| Acpi          | 1,80E-05    | 0,478821432 | 0,731 | 0,333 | 0,284926822 | 4 | Acpi          |
| Gtf2e2        | 1,93E-05    | 0,499844605 | 0,769 | 0,357 | 0,305913883 | 4 | Gtf2e2        |
| Psip1         | 1,98E-05    | 0,54426426  | 0,538 | 0,185 | 0,313913907 | 4 | Psip1         |
| Mcm5          | 2,05E-05    | 0,71324147  | 0,538 | 0,192 | 0,324302052 | 4 | Mcm5          |
| Rpa2          | 2,15E-05    | 0,403810614 | 0,5   | 0,155 | 0,341578177 | 4 | Rpa2          |
| Erh           | 2,20E-05    | 0,367701952 | 0,962 | 0,768 | 0,347971754 | 4 | Erh           |
| Zfp948        | 2,33E-05    | 0,347876822 | 0,538 | 0,168 | 0,369500827 | 4 | Zfp948        |
| Lanc12        | 2,34E-05    | 0,417513217 | 0,308 | 0,067 | 0,371249977 | 4 | Lanc12        |
| Fech          | 2,39E-05    | 0,515959592 | 0,538 | 0,195 | 0,378519208 | 4 | Fech          |
| Bgn           | 2,40E-05    | 0,481443016 | 0,5   | 0,162 | 0,380772815 | 4 | Bgn           |
| Ahctf1        | 2,44E-05    | 0,595541604 | 0,769 | 0,327 | 0,386141939 | 4 | Ahctf1        |
| Ccne2         | 2,44E-05    | 0,518734604 | 0,308 | 0,067 | 0,386344755 | 4 | Ccne2         |
| Dynt1f        | 2,58E-05    | 0,413552815 | 0,846 | 0,542 | 0,408553524 | 4 | Dynt1f        |
| Brip1os       | 2,69E-05    | 0,424299804 | 0,5   | 0,178 | 0,426100806 | 4 | Brip1os       |
| Nxt1          | 2,70E-05    | 0,294623324 | 0,577 | 0,209 | 0,427839983 | 4 | Nxt1          |
| H2afv         | 2,72E-05    | 0,504410643 | 0,846 | 0,451 | 0,431199871 | 4 | H2afv         |
| Polr3k        | 2,88E-05    | 0,467203388 | 0,615 | 0,273 | 0,457155657 | 4 | Polr3k        |
| 4930523C07Rik | 2,91E-05    | 0,301157817 | 0,538 | 0,182 | 0,460818918 | 4 | 4930523C07Rik |
| Prdx4         | 3,10E-05    | 0,501212599 | 0,846 | 0,508 | 0,491277699 | 4 | Prdx4         |
| Gm5           | 3,11E-05    | 0,257662846 | 0,462 | 0,138 | 0,493398401 | 4 | Gm5           |
| Dclk2         | 3,15E-05    | 0,263907276 | 0,308 | 0,071 | 0,498821837 | 4 | Dclk2         |
| Msh6          | 3,30E-05    | 0,257805638 | 0,385 | 0,104 | 0,522521489 | 4 | Msh6          |
| Trp53         | 3,42E-05    | 0,527405236 | 0,885 | 0,515 | 0,542722734 | 4 | Trp53         |
| Rfwd3         | 3,43E-05    | 0,286222941 | 0,423 | 0,118 | 0,544209803 | 4 | Rfwd3         |
| Mcm7          | 3,64E-05    | 0,823066025 | 0,538 | 0,215 | 0,576751429 | 4 | Mcm7          |
| Acot7         | 3,66E-05    | 0,370329991 | 0,654 | 0,283 | 0,579883364 | 4 | Acot7         |
| Banf1         | 3,85E-05    | 0,543904683 | 0,885 | 0,68  | 0,611003266 | 4 | Banf1         |
| Tdp1          | 4,00E-05    | 0,289904006 | 0,346 | 0,088 | 0,633624857 | 4 | Tdp1          |
| Nup85         | 4,13E-05    | 0,380563456 | 0,577 | 0,226 | 0,654338473 | 4 | Nup85         |
| Enpp4         | 4,34E-05    | 0,29452798  | 0,462 | 0,145 | 0,687824915 | 4 | Enpp4         |
| Cdh2          | 4,39E-05    | 0,407385366 | 0,5   | 0,172 | 0,69620362  | 4 | Cdh2          |
| Smc1a         | 4,52E-05    | 0,698912133 | 0,769 | 0,455 | 0,71713066  | 4 | Smc1a         |
| Dph5          | 4,73E-05    | 0,274621252 | 0,462 | 0,145 | 0,749820867 | 4 | Dph5          |
| Rbbp4         | 4,74E-05    | 0,587764481 | 0,808 | 0,512 | 0,751883889 | 4 | Rbbp4         |
| Gmnn          | 4,93E-05    | 0,598456243 | 0,5   | 0,168 | 0,780873705 | 4 | Gmnn          |
| Tardbp        | 4,96E-05    | 0,273993866 | 0,808 | 0,384 | 0,786490013 | 4 | Tardbp        |
| Cdca4         | 5,15E-05    | 0,446720146 | 0,577 | 0,236 | 0,815613174 | 4 | Cdca4         |
| Lyar          | 5,39E-05    | 0,449731627 | 0,577 | 0,242 | 0,854436985 | 4 | Lyar          |
| Srsf1         | 5,41E-05    | 0,485920574 | 0,731 | 0,387 | 0,85715908  | 4 | Srsf1         |
| Ddx39         | 5,44E-05    | 0,550272185 | 0,846 | 0,549 | 0,862435228 | 4 | Ddx39         |
| Fam92a        | 5,63E-05    | 0,407656017 | 0,615 | 0,249 | 0,892909956 | 4 | Fam92a        |
| Cdc23         | 6,02E-05    | 0,28019063  | 0,5   | 0,162 | 0,953827792 | 4 | Cdc23         |
| Prkar2a       | 6,35E-05    | 0,436198025 | 0,5   | 0,185 | 1           | 4 | Prkar2a       |
| Fubp1         | 6,78E-05    | 0,528877363 | 0,808 | 0,478 | 1           | 4 | Fubp1         |
| Pmf1          | 7,47E-05    | 0,446933901 | 0,615 | 0,279 | 1           | 4 | Pmf1          |
| Cbx3          | 7,47E-05    | 0,625209774 | 1     | 0,949 | 1           | 4 | Cbx3          |
| Mbd4          | 7,61E-05    | 0,462076543 | 0,346 | 0,094 | 1           | 4 | Mbd4          |
| Dck           | 8,35E-05    | 0,729953749 | 0,538 | 0,229 | 1           | 4 | Dck           |
| Ppp1r7        | 8,68E-05    | 0,425322885 | 0,654 | 0,286 | 1           | 4 | Ppp1r7        |
| Cdk41         | 8,73E-05    | 0,615033022 | 0,923 | 0,65  | 1           | 4 | Cdk41         |
| Tgtp1         | 8,86E-05    | 0,310962199 | 0,615 | 0,242 | 1           | 4 | Tgtp1         |
| Haus5         | 8,89E-05    | 0,417424847 | 0,308 | 0,077 | 1           | 4 | Haus5         |
| Sf3a3         | 9,17E-05    | 0,676753716 | 0,654 | 0,323 | 1           | 4 | Sf3a3         |
| Mrlp28        | 9,36E-05    | 0,438033552 | 0,769 | 0,401 | 1           | 4 | Mrlp28        |
| Wdr76         | 9,68E-05    | 0,318570824 | 0,423 | 0,141 | 1           | 4 | Wdr76         |
| Hnrnpa1       | 0,000104114 | 0,457422509 | 1     | 0,909 | 1           | 4 | Hnrnpa1       |
| Timm50        | 0,000107137 | 0,39321214  | 0,692 | 0,296 | 1           | 4 | Timm50        |
| Prpf38a       | 0,000116261 | 0,348603153 | 0,577 | 0,226 | 1           | 4 | Prpf38a       |
| Pcna          | 0,000117463 | 0,983670287 | 0,731 | 0,508 | 1           | 4 | Pcna          |
| Anapc5        | 0,000118892 | 0,541835028 | 0,923 | 0,66  | 1           | 4 | Anapc5        |
| Ctcl1         | 0,000126728 | 0,508182481 | 0,385 | 0,114 | 1           | 4 | Ctcl1         |
| Bcar1         | 0,000129959 | 0,334081427 | 0,769 | 0,401 | 1           | 4 | Bcar1         |
| Tpr           | 0,000139638 | 0,591573209 | 0,923 | 0,569 | 1           | 4 | Tpr           |
| Gm14305       | 0,000142963 | 0,294869652 | 0,462 | 0,168 | 1           | 4 | Gm14305       |
| Rhno1         | 0,000149168 | 0,336319586 | 0,462 | 0,165 | 1           | 4 | Rhno1         |
| Gm13461       | 0,000150773 | 0,289361946 | 0,885 | 0,667 | 1           | 4 | Gm13461       |
| Xrcc6         | 0,000153627 | 0,337948796 | 0,385 | 0,118 | 1           | 4 | Xrcc6         |
| Hnrnpf        | 0,000155572 | 0,546345809 | 1     | 0,872 | 1           | 4 | Hnrnpf        |
| Hmgng5        | 0,000156701 | 0,318002762 | 0,615 | 0,242 | 1           | 4 | Hmgng5        |
| Txndc12       | 0,000162136 | 0,392613169 | 0,885 | 0,498 | 1           | 4 | Txndc12       |
| Chek2         | 0,000168048 | 0,462210019 | 0,423 | 0,165 | 1           | 4 | Chek2         |
| Mtf2          | 0,00016841  | 0,294667847 | 0,577 | 0,226 | 1           | 4 | Mtf2          |
| Rdx           | 0,000170685 | 0,418417939 | 0,885 | 0,556 | 1           | 4 | Rdx           |
| Nt5dc2        | 0,000174307 | 0,338769861 | 0,5   | 0,195 | 1           | 4 | Nt5dc2        |
| Miip          | 0,000176942 | 0,287919625 | 0,462 | 0,162 | 1           | 4 | Miip          |
| E2f2          | 0,000177868 | 0,273550842 | 0,269 | 0,064 | 1           | 4 | E2f2          |
| Nop10         | 0,000178185 | 0,330525047 | 0,885 | 0,596 | 1           | 4 | Nop10         |
| Esv2          | 0,000179942 | 0,342910096 | 0,462 | 0,168 | 1           | 4 | Esv2          |
| Dtd1          | 0,00018031  | 0,300435798 | 0,385 | 0,118 | 1           | 4 | Dtd1          |
| Dpy30         | 0,000185969 | 0,393343232 | 0,692 | 0,364 | 1           | 4 | Dpy30         |
| Sumo2         | 0,000188772 | 0,44133607  | 0,962 | 0,842 | 1           | 4 | Sumo2         |
| Apex1         | 0,000189698 | 0,579217962 | 0,615 | 0,293 | 1           | 4 | Apex1         |
| Nde1          | 0,000190305 | 0,476867852 | 0,654 | 0,276 | 1           | 4 | Nde1          |
| Gats12        | 0,000194376 | 0,257101957 | 0,385 | 0,114 | 1           | 4 | Gats12        |
| Dctpp1        | 0,000198697 | 0,390079737 | 0,577 | 0,263 | 1           | 4 | Dctpp1        |
| Tmem97        | 0,000199441 | 0,276611554 | 0,423 | 0,135 | 1           | 4 | Tmem97        |
| Prps1         | 0,000199495 | 0,306836053 | 0,5   | 0,178 | 1           | 4 | Prps1         |
| Tdp2          | 0,000202744 | 0,332806819 | 0,5   | 0,189 | 1           | 4 | Tdp2          |
| Tagln2        | 0,000203499 | 0,449074454 | 0,962 | 0,855 | 1           | 4 | Tagln2        |
| Rad18         | 0,000205756 | 0,338347113 | 0,423 | 0,145 | 1           | 4 | Rad18         |
| Sox11         | 0,000206854 | 0,266347463 | 0,308 | 0,084 | 1           | 4 | Sox11         |
| Cep135        | 0,000207739 | 0,501403172 | 0,269 | 0,067 | 1           | 4 | Cep135        |
| Nudcd2        | 0,000211114 | 0,535596092 | 0,692 | 0,347 | 1           | 4 | Nudcd2        |
| Ssna1         | 0,00021314  | 0,381332243 | 0,885 | 0,522 | 1           | 4 | Ssna1         |
| Nckap1        | 0,000214831 | 0,419330724 | 0,808 | 0,418 | 1           | 4 | Nckap1        |
| Rbm3          | 0,000217076 | 0,356568858 | 0,962 | 0,939 | 1           | 4 | Rbm3          |

|               |             |             |       |       |   |   |               |
|---------------|-------------|-------------|-------|-------|---|---|---------------|
| Ncbp1         | 0,00022413  | 0,416315048 | 0,5   | 0,195 | 1 | 4 | Ncbp1         |
| ldh3a         | 0,000224678 | 0,497839398 | 0,577 | 0,276 | 1 | 4 | ldh3a         |
| Lrrc40        | 0,000242927 | 0,344953422 | 0,308 | 0,088 | 1 | 4 | Lrrc40        |
| Larp7         | 0,000247074 | 0,33470495  | 0,615 | 0,296 | 1 | 4 | Larp7         |
| Hn11          | 0,000249792 | 0,632570775 | 0,885 | 0,596 | 1 | 4 | Hn11          |
| Trim28        | 0,000257412 | 0,456979432 | 0,731 | 0,37  | 1 | 4 | Trim28        |
| Bola3         | 0,000261828 | 0,283762393 | 0,808 | 0,431 | 1 | 4 | Bola3         |
| Tmem106c      | 0,00027184  | 0,268957955 | 0,385 | 0,125 | 1 | 4 | Tmem106c      |
| Usp39         | 0,000279898 | 0,398464934 | 0,538 | 0,212 | 1 | 4 | Usp39         |
| Cdc27         | 0,000288168 | 0,308313308 | 0,538 | 0,222 | 1 | 4 | Cdc27         |
| Snw1          | 0,000308765 | 0,346572547 | 0,692 | 0,364 | 1 | 4 | Snw1          |
| Nop56         | 0,000316798 | 0,374620778 | 0,731 | 0,38  | 1 | 4 | Nop56         |
| Silp          | 0,000317923 | 0,641312922 | 0,769 | 0,418 | 1 | 4 | Silp          |
| Smc3          | 0,000324836 | 0,498648935 | 0,654 | 0,277 | 1 | 4 | Smc3          |
| Hist1h1c      | 0,000335367 | 0,325555966 | 0,538 | 0,212 | 1 | 4 | Hist1h1c      |
| Cnot6l        | 0,000339392 | 0,382876817 | 0,538 | 0,232 | 1 | 4 | Cnot6l        |
| Bace1         | 0,000340854 | 0,261591894 | 0,346 | 0,108 | 1 | 4 | Bace1         |
| Pole4         | 0,000347369 | 0,33195957  | 0,692 | 0,306 | 1 | 4 | Pole4         |
| Ptges3        | 0,000352079 | 0,543383273 | 0,846 | 0,825 | 1 | 4 | Ptges3        |
| Xpo1          | 0,000356219 | 0,484626335 | 0,615 | 0,276 | 1 | 4 | Xpo1          |
| Metap2        | 0,000364247 | 0,543135496 | 0,885 | 0,684 | 1 | 4 | Metap2        |
| Snrpb         | 0,000372579 | 0,474389466 | 0,923 | 0,801 | 1 | 4 | Snrpb         |
| Slc24a5       | 0,000376477 | 0,341554625 | 0,692 | 0,401 | 1 | 4 | Slc24a5       |
| Ccser2        | 0,000393399 | 0,443681071 | 0,731 | 0,401 | 1 | 4 | Ccser2        |
| Sept10        | 0,00039833  | 0,31038034  | 0,923 | 0,673 | 1 | 4 | Sept10        |
| Hist1h1e      | 0,000407433 | 0,332611685 | 0,346 | 0,118 | 1 | 4 | Hist1h1e      |
| Nutf2-ps1     | 0,000411214 | 0,40904806  | 0,846 | 0,589 | 1 | 4 | Nutf2-ps1     |
| Ncaph2        | 0,000414616 | 0,480982658 | 0,692 | 0,407 | 1 | 4 | Ncaph2        |
| Spns21        | 0,000414665 | 0,339942746 | 0,577 | 0,256 | 1 | 4 | Spns21        |
| Pola1         | 0,000416241 | 0,496754721 | 0,308 | 0,094 | 1 | 4 | Pola1         |
| Pfas          | 0,000427941 | 0,380629259 | 0,615 | 0,306 | 1 | 4 | Pfas          |
| Ddx42         | 0,000457848 | 0,346627899 | 0,654 | 0,337 | 1 | 4 | Ddx42         |
| Rfc1          | 0,000461611 | 0,395100585 | 0,462 | 0,195 | 1 | 4 | Rfc1          |
| Hjurp         | 0,000464213 | 0,359318525 | 0,692 | 0,387 | 1 | 4 | Hjurp         |
| Rfc3          | 0,000464527 | 0,367144803 | 0,423 | 0,155 | 1 | 4 | Rfc3          |
| Cct71         | 0,000468691 | 0,595654946 | 0,808 | 0,643 | 1 | 4 | Cct71         |
| Pebp1         | 0,000469899 | 0,387713185 | 0,885 | 0,572 | 1 | 4 | Pebp1         |
| Sorbs21       | 0,000477685 | 0,33515424  | 0,731 | 0,38  | 1 | 4 | Sorbs21       |
| Ddx39b        | 0,000491796 | 0,492938786 | 0,885 | 0,643 | 1 | 4 | Ddx39b        |
| Gart          | 0,000523688 | 0,41853281  | 0,5   | 0,212 | 1 | 4 | Gart          |
| Senp1         | 0,000528564 | 0,434907678 | 0,385 | 0,148 | 1 | 4 | Senp1         |
| Skiv2l2       | 0,000536157 | 0,425415069 | 0,615 | 0,323 | 1 | 4 | Skiv2l2       |
| Rbm8a         | 0,000557748 | 0,460357628 | 0,885 | 0,606 | 1 | 4 | Rbm8a         |
| Saal1         | 0,000573156 | 0,283504226 | 0,308 | 0,091 | 1 | 4 | Saal1         |
| Uck2          | 0,000578526 | 0,262687369 | 0,731 | 0,391 | 1 | 4 | Uck2          |
| Cul5          | 0,000578578 | 0,522879288 | 0,615 | 0,31  | 1 | 4 | Cul5          |
| Pouz1f1       | 0,000610584 | 0,322102867 | 0,346 | 0,111 | 1 | 4 | Pouz1f1       |
| Hnrnpm        | 0,000623899 | 0,331302863 | 0,962 | 0,569 | 1 | 4 | Hnrnpm        |
| Setx          | 0,000638483 | 0,388236528 | 0,615 | 0,32  | 1 | 4 | Setx          |
| Aldh18a1      | 0,000643311 | 0,551416312 | 0,346 | 0,114 | 1 | 4 | Aldh18a1      |
| Fh1           | 0,000664059 | 0,285745824 | 0,615 | 0,293 | 1 | 4 | Fh1           |
| Nudc          | 0,000665619 | 0,411958196 | 0,923 | 0,593 | 1 | 4 | Nudc          |
| Vars          | 0,000687327 | 0,437876554 | 0,615 | 0,33  | 1 | 4 | Vars          |
| Reep4         | 0,000689693 | 0,399982094 | 0,385 | 0,138 | 1 | 4 | Reep4         |
| Lsm6          | 0,000696128 | 0,262241704 | 0,846 | 0,465 | 1 | 4 | Lsm6          |
| Mdm2          | 0,000715952 | 0,325098634 | 0,615 | 0,34  | 1 | 4 | Mdm2          |
| Bag5          | 0,000729645 | 0,316043906 | 0,577 | 0,263 | 1 | 4 | Bag5          |
| 1810037l17Rik | 0,00075201  | 0,351855739 | 0,885 | 0,65  | 1 | 4 | 1810037l17Rik |
| Cpne81        | 0,00076461  | 0,354042751 | 0,808 | 0,455 | 1 | 4 | Cpne81        |
| Cdt11         | 0,000778736 | 0,599044634 | 0,385 | 0,145 | 1 | 4 | Cdt11         |
| Oat           | 0,000797705 | 0,503235437 | 0,5   | 0,222 | 1 | 4 | Oat           |
| Anapc4        | 0,000804846 | 0,437028176 | 0,615 | 0,323 | 1 | 4 | Anapc4        |
| Magoh         | 0,000815194 | 0,382714653 | 0,731 | 0,418 | 1 | 4 | Magoh         |
| Xpo4          | 0,000828364 | 0,405159809 | 0,346 | 0,121 | 1 | 4 | Xpo4          |
| Fundc2        | 0,000841178 | 0,270797338 | 0,769 | 0,424 | 1 | 4 | Fundc2        |
| Ilf2          | 0,00085154  | 0,658099914 | 0,654 | 0,407 | 1 | 4 | Ilf2          |
| Ptgrn         | 0,000857349 | 0,66437979  | 0,5   | 0,242 | 1 | 4 | Ptgrn         |
| Bcl6b1        | 0,000863145 | 0,301857172 | 0,692 | 0,32  | 1 | 4 | Bcl6b1        |
| Abce1         | 0,000873304 | 0,526261667 | 0,615 | 0,347 | 1 | 4 | Abce1         |
| Cse11         | 0,00087961  | 0,356467456 | 0,538 | 0,236 | 1 | 4 | Cse11         |
| Pmp221        | 0,000895072 | 0,261674867 | 0,538 | 0,226 | 1 | 4 | Pmp221        |
| Hnrnpab       | 0,000895355 | 0,383211953 | 0,962 | 0,737 | 1 | 4 | Hnrnpab       |
| Adss          | 0,000902004 | 0,381331164 | 0,692 | 0,35  | 1 | 4 | Adss          |
| Nedd42        | 0,000903078 | 0,332474485 | 1     | 0,694 | 1 | 4 | Nedd42        |
| Prpf4         | 0,000909132 | 0,397377924 | 0,423 | 0,165 | 1 | 4 | Prpf4         |
| Eif4e         | 0,000921791 | 0,536239494 | 0,731 | 0,485 | 1 | 4 | Eif4e         |
| Cdc123        | 0,000927381 | 0,274664708 | 0,731 | 0,377 | 1 | 4 | Cdc123        |
| Nsmce4a       | 0,000969876 | 0,371593141 | 0,5   | 0,226 | 1 | 4 | Nsmce4a       |
| Dtymk         | 0,000985871 | 0,288603889 | 0,731 | 0,394 | 1 | 4 | Dtymk         |
| Csnk1a1       | 0,000996366 | 0,359474098 | 1     | 0,731 | 1 | 4 | Csnk1a1       |
| Snrpa1        | 0,01003124  | 0,34220417  | 0,769 | 0,391 | 1 | 4 | Snrpa1        |
| Hcf1          | 0,010034694 | 0,327986452 | 0,654 | 0,34  | 1 | 4 | Hcf1          |
| Irf1          | 0,01040847  | 0,296978351 | 0,692 | 0,367 | 1 | 4 | Irf1          |
| Lrrc581       | 0,01069773  | 0,396857753 | 1     | 0,919 | 1 | 4 | Lrrc581       |
| Abcb7         | 0,01081405  | 0,304647804 | 0,269 | 0,077 | 1 | 4 | Abcb7         |
| Arhgef151     | 0,01100182  | 0,321226437 | 0,885 | 0,559 | 1 | 4 | Arhgef151     |
| Eif4a3        | 0,01101363  | 0,571396802 | 0,769 | 0,535 | 1 | 4 | Eif4a3        |
| Rbmx          | 0,01147673  | 0,27752192  | 0,385 | 0,145 | 1 | 4 | Rbmx          |
| Eed           | 0,01157582  | 0,360644324 | 0,462 | 0,205 | 1 | 4 | Eed           |
| Sqle          | 0,01175399  | 0,38789123  | 0,385 | 0,145 | 1 | 4 | Sqle          |
| Haus4         | 0,01187806  | 0,266914668 | 0,423 | 0,158 | 1 | 4 | Haus4         |
| Mre11a        | 0,01222093  | 0,386164001 | 0,308 | 0,098 | 1 | 4 | Mre11a        |
| Eef1d         | 0,01281902  | 0,378673966 | 0,885 | 0,613 | 1 | 4 | Eef1d         |
| Nrm           | 0,0128435   | 0,288128806 | 0,346 | 0,121 | 1 | 4 | Nrm           |
| ldh2          | 0,01319593  | 0,462580693 | 0,615 | 0,316 | 1 | 4 | ldh2          |
| Lmf2          | 0,01342014  | 0,383687249 | 0,731 | 0,391 | 1 | 4 | Lmf2          |
| Haus81        | 0,01347587  | 0,356659299 | 0,346 | 0,125 | 1 | 4 | Haus81        |
| Gm5641        | 0,01351571  | 0,343903079 | 0,731 | 0,455 | 1 | 4 | Gm5641        |
| Chaf1b        | 0,01381375  | 0,558915521 | 0,308 | 0,104 | 1 | 4 | Chaf1b        |
| Tm9sf1        | 0,01382721  | 0,492197662 | 0,692 | 0,374 | 1 | 4 | Tm9sf1        |
| Syncrip       | 0,01433413  | 0,455820735 | 0,731 | 0,471 | 1 | 4 | Syncrip       |
| Rcan3         | 0,01468182  | 0,397667588 | 0,5   | 0,242 | 1 | 4 | Rcan3         |
| Hsp90aa1      | 0,01484324  | 0,425807751 | 0,962 | 0,778 | 1 | 4 | Hsp90aa1      |
| Mcm6          | 0,01501957  | 0,53403897  | 0,615 | 0,343 | 1 | 4 | Mcm6          |
| Traf71        | 0,01515551  | 0,387780986 | 0,692 | 0,377 | 1 | 4 | Traf71        |
| Arpp19        | 0,01548831  | 0,286308722 | 1     | 0,828 | 1 | 4 | Arpp19        |
| Paics         | 0,01550086  | 0,38285376  | 0,808 | 0,471 | 1 | 4 | Paics         |
| Npm1          | 0,01605372  | 0,507958893 | 0,962 | 0,902 | 1 | 4 | Npm1          |
| Sigirr        | 0,01651044  | 0,388500438 | 0,577 | 0,283 | 1 | 4 | Sigirr        |
| Cbx6          | 0,01651255  | 0,393694629 | 0,346 | 0,121 | 1 | 4 | Cbx6          |
| Ndufs1        | 0,01663712  | 0,292822433 | 0,615 | 0,293 | 1 | 4 | Ndufs1        |
| Ndc1          | 0,01664646  | 0,291321355 | 0,308 | 0,104 | 1 | 4 | Ndc1          |
| Eri1          | 0,01748155  | 0,25342687  | 0,423 | 0,165 | 1 | 4 | Eri1          |
| 4932438A13Rik | 0,01769152  | 0,387592432 | 0,731 | 0,401 | 1 | 4 | 4932438A13Rik |
| Ptbp11        | 0,01776573  | 0,439735785 | 0,769 | 0,559 | 1 | 4 | Ptbp11        |
| Nfib1         | 0,01777176  | 0,408571372 | 0,885 | 0,599 | 1 | 4 | Nfib1         |
| A1506816      | 0,01780105  | 0,559389826 | 0,692 | 0,441 | 1 | 4 | A1506816      |
| Mcm3          | 0,01834633  | 0,400354958 | 0,538 | 0,273 | 1 | 4 | Mcm3          |
| Ak6           | 0,01955284  | 0,453708553 | 0,846 | 0,559 | 1 | 4 | Ak6           |
| Dennd5b       | 0,01967123  | 0,270686452 | 0,692 | 0,377 | 1 | 4 | Dennd5b       |
| Morf4l21      | 0,01981969  | 0,371298597 | 1     | 0,795 | 1 | 4 | Morf4l21      |

|            |             |             |       |       |   |       |            |
|------------|-------------|-------------|-------|-------|---|-------|------------|
| Pds5a      | 0.002040127 | 0.349488827 | 0.577 | 0.316 | 1 | 4     | Pds5a      |
| Nhp2       | 0.00207112  | 0.276037779 | 0.808 | 0.505 | 1 | 4     | Nhp2       |
| Comm10     | 0.002074028 | 0.323562754 | 0.692 | 0.407 | 1 | 4     | Comm10     |
| Phc1       | 0.002098622 | 0.386422285 | 0.346 | 0.125 | 1 | 4     | Phc1       |
| Ifrd1      | 0.00212525  | 0.254676111 | 0.577 | 0.293 | 1 | 4     | Ifrd1      |
| Ptprk1     | 0.00212596  | 0.353991562 | 0.731 | 0.441 | 1 | 4     | Ptprk1     |
| Nup93      | 0.002176561 | 0.331913446 | 0.5   | 0.226 | 1 | 4     | Nup93      |
| Suv39h1    | 0.00218385  | 0.281481603 | 0.346 | 0.128 | 1 | 4     | Suv39h1    |
| Hnrnpk     | 0.002249413 | 0.361775651 | 0.962 | 0.57  | 1 | 4     | Hnrnpk     |
| Bub3       | 0.002270754 | 0.448089863 | 0.808 | 0.556 | 1 | 4     | Bub3       |
| Eng1       | 0.00230779  | 0.31678819  | 0.769 | 0.478 | 1 | 4     | Eng1       |
| Snrpe      | 0.002348526 | 0.251665876 | 0.885 | 0.71  | 1 | 4     | Snrpe      |
| Rsl1d1     | 0.002362606 | 0.456837652 | 0.615 | 0.357 | 1 | 4     | Rsl1d1     |
| Hnrnpu     | 0.002414952 | 0.400419297 | 0.923 | 0.774 | 1 | 4     | Hnrnpu     |
| Btdb10     | 0.00245016  | 0.262688953 | 0.385 | 0.155 | 1 | 4     | Btdb10     |
| Ddx50      | 0.002490292 | 0.436017263 | 0.692 | 0.441 | 1 | 4     | Ddx50      |
| Tmem252    | 0.002522726 | 0.427904483 | 0.923 | 0.599 | 1 | 4     | Tmem252    |
| Hspd1      | 0.002524513 | 0.550103867 | 0.692 | 0.401 | 1 | 4     | Hspd1      |
| Sf3a1      | 0.002538131 | 0.260714237 | 0.538 | 0.283 | 1 | 4     | Sf3a1      |
| Fem1c      | 0.00255264  | 0.345014732 | 0.5   | 0.246 | 1 | 4     | Fem1c      |
| Hnrnpa2b1  | 0.002629211 | 0.307344815 | 1     | 0.97  | 1 | 4     | Hnrnpa2b1  |
| Mis12      | 0.002640357 | 0.273810482 | 0.346 | 0.131 | 1 | 4     | Mis12      |
| Tmem98     | 0.002740893 | 0.401047086 | 0.5   | 0.253 | 1 | 4     | Tmem98     |
| Ewsr1      | 0.00277803  | 0.436253573 | 0.923 | 0.7   | 1 | 4     | Ewsr1      |
| Foxp11     | 0.002884621 | 0.397266785 | 0.808 | 0.603 | 1 | 4     | Foxp11     |
| Actn42     | 0.002949146 | 0.328135609 | 0.962 | 0.825 | 1 | 4     | Actn42     |
| Mtmr2      | 0.002959692 | 0.270310615 | 0.923 | 0.68  | 1 | 4     | Mtmr2      |
| Yaf2       | 0.003033766 | 0.371827324 | 0.654 | 0.357 | 1 | 4     | Yaf2       |
| Eif4g21    | 0.003036478 | 0.305951544 | 1     | 0.896 | 1 | 4     | Eif4g21    |
| Clap4      | 0.003098924 | 0.275315001 | 0.654 | 0.367 | 1 | 4     | Clap4      |
| Ntsc3      | 0.003291074 | 0.309085254 | 0.423 | 0.189 | 1 | 4     | Ntsc3      |
| Psmb7      | 0.003377212 | 0.351383049 | 0.808 | 0.616 | 1 | 4     | Psmb7      |
| Hdac3      | 0.00338766  | 0.607822481 | 0.462 | 0.266 | 1 | 4     | Hdac3      |
| Pfdn6      | 0.003522117 | 0.323592012 | 0.654 | 0.394 | 1 | 4     | Pfdn6      |
| Pbdc1      | 0.003555042 | 0.270102768 | 0.654 | 0.37  | 1 | 4     | Pbdc1      |
| Cggbp1     | 0.003697607 | 0.262346918 | 0.769 | 0.488 | 1 | 4     | Cggbp1     |
| Nme1       | 0.003755208 | 0.419369076 | 0.885 | 0.66  | 1 | 4     | Nme1       |
| Atrx       | 0.003834    | 0.596193858 | 0.885 | 0.606 | 1 | 4     | Atrx       |
| Cops7a     | 0.003885847 | 0.314004403 | 0.731 | 0.424 | 1 | 4     | Cops7a     |
| Sf3b3      | 0.003910793 | 0.499686723 | 0.654 | 0.38  | 1 | 4     | Sf3b3      |
| Sac3d1     | 0.003920886 | 0.278733932 | 0.423 | 0.195 | 1 | 4     | Sac3d1     |
| Cdkn2aipnl | 0.004075115 | 0.312102192 | 0.731 | 0.478 | 1 | 4     | Cdkn2aipnl |
| Mad1l1     | 0.004082832 | 0.331017573 | 0.385 | 0.165 | 1 | 4     | Mad1l1     |
| Scoc       | 0.004100055 | 0.40817843  | 0.615 | 0.377 | 1 | 4     | Scoc       |
| Gm20390    | 0.00415017  | 0.348010676 | 0.846 | 0.576 | 1 | 4     | Gm20390    |
| Rnf19a1    | 0.004277098 | 0.363343588 | 0.5   | 0.256 | 1 | 4     | Rnf19a1    |
| Klf2       | 0.004298628 | 0.274964298 | 0.962 | 0.636 | 1 | 4     | Klf2       |
| Mat1       | 0.004325405 | 0.326366126 | 0.577 | 0.333 | 1 | 4     | Mat1       |
| Ube2l      | 0.004372631 | 0.290576301 | 0.923 | 0.781 | 1 | 4     | Ube2l      |
| Pngt1      | 0.004430852 | 0.278530868 | 0.423 | 0.199 | 1 | 4     | Pngt1      |
| Acadl      | 0.004652178 | 0.345571067 | 0.769 | 0.512 | 1 | 4     | Acadl      |
| Thrap3     | 0.004693192 | 0.37812433  | 0.808 | 0.549 | 1 | 4     | Thrap3     |
| Smad5      | 0.004741123 | 0.272226562 | 0.692 | 0.414 | 1 | 4     | Smad5      |
| Cyc1       | 0.004748444 | 0.412402023 | 0.846 | 0.586 | 1 | 4     | Cyc1       |
| Prpf18     | 0.004761196 | 0.360208663 | 0.423 | 0.202 | 1 | 4     | Prpf18     |
| Ppfbp11    | 0.004780677 | 0.452431256 | 0.885 | 0.646 | 1 | 4     | Ppfbp11    |
| Prdx6      | 0.004898488 | 0.419756939 | 0.769 | 0.535 | 1 | 4     | Prdx6      |
| Sept7      | 0.005173022 | 0.430881839 | 1     | 0.781 | 1 | 4     | Sept7      |
| Abcf2      | 0.005331874 | 0.325272912 | 0.5   | 0.259 | 1 | 4     | Abcf2      |
| Psm1       | 0.005365597 | 0.332615028 | 0.885 | 0.586 | 1 | 4     | Psm1       |
| Mum1       | 0.005445942 | 0.263060229 | 0.5   | 0.242 | 1 | 4     | Mum1       |
| Dnajc3     | 0.005497515 | 0.449844542 | 0.808 | 0.545 | 1 | 4     | Dnajc3     |
| Mrp171     | 0.005533366 | 0.294240962 | 0.923 | 0.7   | 1 | 4     | Mrp171     |
| Bzw1       | 0.005601851 | 0.29585303  | 0.962 | 0.774 | 1 | 4     | Bzw1       |
| G3bp1      | 0.005659104 | 0.396282059 | 0.846 | 0.64  | 1 | 4     | G3bp1      |
| Nu11       | 0.005693551 | 0.432694068 | 0.346 | 0.152 | 1 | 4     | Nu11       |
| Ddb1       | 0.005793488 | 0.306228124 | 0.846 | 0.569 | 1 | 4     | Ddb1       |
| Ptore      | 0.005895568 | 0.335414972 | 0.731 | 0.468 | 1 | 4     | Ptore      |
| Eif2s1     | 0.005931635 | 0.488885085 | 0.769 | 0.559 | 1 | 4     | Eif2s1     |
| Lrch3      | 0.005966452 | 0.380040031 | 0.5   | 0.253 | 1 | 4     | Lrch3      |
| Lpp1       | 0.006033822 | 0.400011311 | 0.885 | 0.643 | 1 | 4     | Lpp1       |
| Rps6ka3    | 0.00606259  | 0.318832224 | 0.615 | 0.35  | 1 | 4     | Rps6ka3    |
| Ruvbl2     | 0.006097777 | 0.391555534 | 0.538 | 0.316 | 1 | 4     | Ruvbl2     |
| Lias       | 0.006099305 | 0.296332785 | 0.462 | 0.226 | 1 | 4     | Lias       |
| C1qtnf1    | 0.006146375 | 0.3013892   | 0.577 | 0.313 | 1 | 4     | C1qtnf1    |
| Cnih1      | 0.00624765  | 0.29594002  | 0.731 | 0.451 | 1 | 4     | Cnih1      |
| Lsm4       | 0.00632255  | 0.326615896 | 0.731 | 0.576 | 1 | 4     | Lsm4       |
| Vangl1     | 0.006365817 | 0.357804081 | 0.577 | 0.31  | 1 | 4     | Vangl1     |
| Tmco1      | 0.006383131 | 0.355091008 | 0.885 | 0.579 | 1 | 4     | Tmco1      |
| Hnrnp1     | 0.00639145  | 0.255004229 | 0.731 | 0.397 | 1 | 4     | Hnrnp1     |
| Cnot7      | 0.006394931 | 0.270583374 | 0.577 | 0.293 | 1 | 4     | Cnot7      |
| Uchl5      | 0.006471404 | 0.494299285 | 0.5   | 0.306 | 1 | 4     | Uchl5      |
| Rsrc1      | 0.006530706 | 0.311052972 | 0.5   | 0.283 | 1 | 4     | Rsrc1      |
| Vdac2      | 0.006677273 | 0.403151214 | 0.808 | 0.62  | 1 | 4     | Vdac2      |
| Tpm42      | 0.006757866 | 0.315619232 | 0.919 | 1     | 4 | Tpm42 |            |
| Exoc4      | 0.006765523 | 0.40816786  | 0.5   | 0.232 | 1 | 4     | Exoc4      |
| Nr3c1      | 0.006781526 | 0.330522511 | 0.5   | 0.266 | 1 | 4     | Nr3c1      |
| Psmc3      | 0.006824978 | 0.30128153  | 0.923 | 0.754 | 1 | 4     | Psmc3      |
| Rock2      | 0.006931161 | 0.269567968 | 0.769 | 0.448 | 1 | 4     | Rock2      |
| Atp5o      | 0.007018681 | 0.301417137 | 0.885 | 0.785 | 1 | 4     | Atp5o      |
| Cul1       | 0.007020667 | 0.310678348 | 0.654 | 0.438 | 1 | 4     | Cul1       |
| Bex3       | 0.007063181 | 0.421220817 | 0.5   | 0.306 | 1 | 4     | Bex3       |
| Mdp1       | 0.007071239 | 0.330180917 | 0.462 | 0.239 | 1 | 4     | Mdp1       |
| Rrp9       | 0.007162519 | 0.302912567 | 0.385 | 0.172 | 1 | 4     | Rrp9       |
| Vbp1       | 0.007191328 | 0.298587321 | 0.654 | 0.394 | 1 | 4     | Vbp1       |
| Atad3a     | 0.007332203 | 0.401567459 | 0.385 | 0.175 | 1 | 4     | Atad3a     |
| Maoa1      | 0.007348431 | 0.251256031 | 0.462 | 0.229 | 1 | 4     | Maoa1      |
| Cfb        | 0.007367904 | 0.305743682 | 0.577 | 0.343 | 1 | 4     | Cfb        |
| Fam57a     | 0.007370972 | 0.283321063 | 0.538 | 0.283 | 1 | 4     | Fam57a     |
| Tmem263    | 0.007475196 | 0.34073191  | 0.654 | 0.401 | 1 | 4     | Tmem263    |
| Txn1       | 0.007483034 | 0.261356067 | 0.731 | 0.441 | 1 | 4     | Txn1       |
| Prdx1      | 0.007511631 | 0.276283305 | 1     | 0.933 | 1 | 4     | Prdx1      |
| Terf1      | 0.007543319 | 0.30525091  | 0.385 | 0.195 | 1 | 4     | Terf1      |
| Stip1      | 0.007639978 | 0.411542538 | 0.654 | 0.401 | 1 | 4     | Stip1      |
| Cdv3       | 0.00779264  | 0.252263766 | 0.731 | 0.475 | 1 | 4     | Cdv3       |
| Bak1       | 0.007938939 | 0.455440041 | 0.654 | 0.374 | 1 | 4     | Bak1       |
| Pnn        | 0.008052137 | 0.321902291 | 0.615 | 0.367 | 1 | 4     | Pnn        |
| Stard4     | 0.008261766 | 0.341964547 | 0.5   | 0.269 | 1 | 4     | Stard4     |
| Srsf7      | 0.008329221 | 0.499520473 | 0.808 | 0.62  | 1 | 4     | Srsf7      |
| Polr2a     | 0.008454682 | 0.370306873 | 0.731 | 0.475 | 1 | 4     | Polr2a     |
| Pcnp       | 0.008515155 | 0.313707087 | 0.962 | 0.65  | 1 | 4     | Pcnp       |
| Serb1      | 0.008559509 | 0.348017357 | 0.885 | 0.835 | 1 | 4     | Serb1      |
| Eif3b      | 0.008685734 | 0.257394744 | 0.769 | 0.485 | 1 | 4     | Eif3b      |
| Pdlim12    | 0.008764796 | 0.305473059 | 1     | 0.68  | 1 | 4     | Pdlim12    |
| Nop58      | 0.008935347 | 0.314659671 | 0.538 | 0.306 | 1 | 4     | Nop58      |
| Psm11      | 0.00899522  | 0.325887091 | 0.731 | 0.478 | 1 | 4     | Psm11      |
| Med21      | 0.00905472  | 0.289840737 | 0.654 | 0.374 | 1 | 4     | Med21      |
| Nelfcd     | 0.009115361 | 0.386697596 | 0.423 | 0.212 | 1 | 4     | Nelfcd     |
| Ctcc1      | 0.009144606 | 0.287964744 | 0.5   | 0.256 | 1 | 4     | Ctcc1      |
| Gabpb1     | 0.009159407 | 0.30169468  | 0.5   | 0.279 | 1 | 4     | Gabpb1     |
| Abcc4      | 0.009182116 | 0.267470491 | 0.654 | 0.411 | 1 | 4     | Abcc4      |
| Nnt        | 0.009377173 | 0.295580726 | 0.308 | 0.131 | 1 | 4     | Nnt        |
| Acat1      | 0.009533531 | 0.278417094 | 0.692 | 0.418 | 1 | 4     | Acat1      |
| Eif6       | 0.00954532  | 0.276613927 | 0.846 | 0.596 | 1 | 4     | Eif6       |
| Nsmc2      | 0.009564087 | 0.307072352 | 0.538 | 0.316 | 1 | 4     | Nsmc2      |
| Togbp1     | 0.00980864  | 0.314917924 | 0.462 | 0.242 | 1 | 4     | Togbp1     |
| Kars       | 0.009981205 | 0.35528808  | 0.808 | 0.593 | 1 | 4     | Kars       |
| Mrp151     | 0.009992646 | 0.250728522 | 0.769 | 0.569 | 1 | 4     | Mrp151     |
