# Supplementary material for: Emerging single cell endothelial heterogeneity supports sprouting tumour angiogenesis and growth
Source: bioRxiv or medRxiv preprint supplement (doi:10.1101/2021.06.09.447719), 2021-06-11
Supplement: Supplementary file [file media-5.pdf]

Supplemental Table 2

| p_val     | avg_logFC   | pct.1 | pct.2 | p_val_adj | cluster  | gene       | log2fc     | log2pct    |
|-----------|-------------|-------|-------|-----------|----------|------------|------------|------------|
| 1.59E-112 | 0.87802355  | 0.953 | 0.622 | 5.60E-108 | CL_KCNE3 | FLT1       | 1.26672022 | 0.61156021 |
| 7.93E-108 | 0.846246705 | 0.87  | 0.554 | 2.79E-103 | CL_KCNE3 | HTRA1      | 1.22087592 | 0.64643473 |
| 5.73E-99  | 1.00221056  | 0.931 | 0.611 | 2.01E-94  | CL_KCNE3 | INSR       | 1.4458842  | 0.60357818 |
| 5.03E-93  | 0.769270394 | 0.903 | 0.577 | 1.77E-88  | CL_KCNE3 | VWA1       | 1.10982258 | 0.64167314 |
| 1.58E-91  | 1.587201504 | 0.454 | 0.088 | 5.54E-87  | CL_KCNE3 | ESM1       | 2.28984774 | 2.30315153 |
| 8.39E-86  | 0.746708624 | 0.818 | 0.469 | 2.95E-81  | CL_KCNE3 | KDR        | 1.07727283 | 0.79600537 |
| 6.95E-78  | 0.887854634 | 0.69  | 0.351 | 2.45E-73  | CL_KCNE3 | LINC00152  | 1.28090348 | 0.96513574 |
| 2.42E-71  | 0.633814295 | 0.433 | 0.086 | 8.51E-67  | CL_KCNE3 | GABRD      | 0.91440074 | 2.26699242 |
| 5.71E-70  | 0.59393839  | 0.463 | 0.131 | 2.01E-65  | CL_KCNE3 | COL13A1    | 0.86682212 | 1.78290188 |
| 6.65E-67  | 0.683931719 | 0.846 | 0.557 | 2.46E-62  | CL_KCNE3 | TMEM204    | 0.98943959 | 0.599899   |
| 3.73E-66  | 0.622761943 | 0.719 | 0.358 | 1.31E-61  | CL_KCNE3 | HCEW2      | 0.98845557 | 0.99602015 |
| 2.63E-64  | 0.576362347 | 0.506 | 0.132 | 9.25E-60  | CL_KCNE3 | EDIL3      | 0.8315151  | 1.8991474  |
| 4.28E-64  | 0.59301742  | 0.78  | 0.462 | 1.50E-59  | CL_KCNE3 | MLEC       | 0.85554329 | 0.7492701  |
| 3.02E-63  | 0.493853512 | 0.43  | 0.097 | 1.06E-58  | CL_KCNE3 | ADAMTSL2   | 0.71248001 | 2.09244625 |
| 6.17E-61  | 0.435978375 | 0.336 | 0.055 | 2.17E-56  | CL_KCNE3 | ITGA8      | 0.62898384 | 2.50673733 |
| 1.85E-59  | 0.601928682 | 0.78  | 0.443 | 6.52E-55  | CL_KCNE3 | ITGA1      | 0.86839953 | 0.80919392 |
| 2.95E-59  | 0.667206633 | 0.541 | 0.182 | 1.04E-54  | CL_KCNE3 | EDNRB      | 0.9625757  | 1.54586268 |
| 2.63E-58  | 0.601855227 | 0.468 | 0.127 | 9.24E-54  | CL_KCNE3 | UNC5B      | 0.86829555 | 1.84130225 |
| 4.34E-56  | 0.845373429 | 0.463 | 0.161 | 1.52E-51  | CL_KCNE3 | CA2        | 1.21961605 | 1.49332529 |
| 5.63E-55  | 0.672657323 | 0.53  | 0.216 | 1.98E-50  | CL_KCNE3 | MIR4435-1H | 0.97188209 | 2.2827105  |
| 1.34E-54  | 0.52587935  | 0.674 | 0.344 | 4.72E-50  | CL_KCNE3 | PINK1      | 0.75840738 | 0.96018454 |
| 6.06E-54  | 0.571016751 | 0.596 | 0.247 | 2.13E-49  | CL_KCNE3 | PDGFD      | 0.82380303 | 1.25394126 |
| 7.19E-54  | 0.722655084 | 0.681 | 0.442 | 2.53E-49  | CL_KCNE3 | PPAP2B     | 1.04257091 | 0.61793374 |
| 2.64E-53  | 0.577797715 | 0.712 | 0.354 | 9.27E-49  | CL_KCNE3 | LAMA4      | 0.8335859  | 0.99798927 |
| 7.36E-53  | 1.056536355 | 0.735 | 0.374 | 2.59E-48  | CL_KCNE3 | IGFBP3     | 1.52425976 | 0.96532742 |
| 2.97E-45  | 0.537242979 | 0.456 | 0.173 | 1.05E-40  | CL_KCNE3 | CPM        | 0.77507778 | 1.37288951 |
| 3.49E-45  | 0.584129368 | 0.522 | 0.22  | 1.23E-40  | CL_KCNE3 | LBH        | 0.84272054 | 1.22787796 |
| 7.50E-45  | 0.481220259 | 0.742 | 0.431 | 2.64E-40  | CL_KCNE3 | PTPRG      | 0.69425408 | 0.77678011 |
| 8.96E-45  | 0.646315267 | 0.723 | 0.417 | 3.15E-40  | CL_KCNE3 | MNS1ABP    | 0.9324372  | 0.78669545 |
| 1.70E-43  | 0.51650935  | 0.591 | 0.303 | 3.96E-39  | CL_KCNE3 | PMEPA1     | 0.74516548 | 0.95238198 |
| 7.20E-43  | 0.575370801 | 0.239 | 0.042 | 2.53E-38  | CL_KCNE3 | KCNE3      | 0.8300846  | 2.37614849 |
| 6.67E-42  | 0.471656107 | 0.634 | 0.335 | 2.35E-37  | CL_KCNE3 | DYSF       | 0.68045593 | 0.91028118 |
| 3.30E-41  | 0.878495504 | 0.423 | 0.158 | 1.16E-36  | CL_KCNE3 | ANGPT2     | 1.26740111 | 1.39273883 |
| 1.92E-40  | 0.461466877 | 0.589 | 0.268 | 6.76E-36  | CL_KCNE3 | CDA        | 0.66575597 | 1.12156198 |
| 1.56E-39  | 0.469998415 | 0.676 | 0.402 | 5.49E-35  | CL_KCNE3 | GRB10      | 0.67806438 | 0.742626   |
| 2.97E-39  | 0.507460943 | 0.634 | 0.33  | 1.05E-34  | CL_KCNE3 | NRP2       | 0.73211139 | 0.93165484 |
| 3.86E-39  | 0.506416454 | 0.487 | 0.192 | 1.36E-34  | CL_KCNE3 | ANGPTL2    | 0.73060451 | 1.32046269 |
| 1.11E-38  | 0.497387291 | 0.693 | 0.395 | 3.89E-34  | CL_KCNE3 | MNGB1      | 0.71757818 | 0.80322704 |
| 5.26E-37  | 0.421638742 | 0.683 | 0.363 | 1.85E-32  | CL_KCNE3 | RASSRF3    | 0.6147882  | 0.9027028  |
| 5.61E-37  | 0.58821679  | 0.605 | 0.291 | 1.97E-32  | CL_KCNE3 | TNFRSF4    | 0.84861745 | 1.04321207 |
| 4.81E-172 | 1.412837547 | 0.699 | 0.159 | 1.69E-167 | CL_NID2  | PGF        | 2.03829372 | 2.10187961 |
| 8.96E-118 | 0.885838766 | 0.493 | 0.062 | 3.15E-113 | CL_NID2  | LOX        | 1.27799519 | 2.89391274 |
| 9.61E-112 | 1.31965574  | 0.344 | 0.019 | 3.38E-107 | CL_NID2  | LY6H       | 1.90386079 | 3.86212073 |
| 2.90E-111 | 1.234329222 | 0.599 | 0.26  | 1.02E-106 | CL_NID2  | APOD       | 1.78076065 | 1.18855619 |
| 1.21E-110 | 0.981425447 | 0.713 | 0.322 | 4.27E-106 | CL_NID2  | PXDN       | 1.41589763 | 1.13469321 |
| 2.15E-87  | 0.928723284 | 0.628 | 0.225 | 7.55E-83  | CL_NID2  | TP53I11    | 1.33986448 | 1.46057164 |
| 1.07E-76  | 0.769417077 | 0.748 | 0.443 | 3.77E-72  | CL_NID2  | FSCN1      | 1.1100342  | 0.74915113 |
| 1.85E-72  | 0.709842287 | 0.398 | 0.097 | 6.50E-68  | CL_NID2  | CHST1      | 1.01704848 | 1.98221069 |
| 2.09E-67  | 0.71358486  | 0.347 | 0.073 | 7.26E-63  | CL_NID2  | NID2       | 1.02944729 | 2.1740294  |
| 1.03E-60  | 0.764619016 | 0.708 | 0.358 | 3.63E-56  | CL_NID2  | LAMA4      | 1.10311206 | 0.97393253 |
| 1.46E-60  | 0.636086182 | 0.579 | 0.239 | 5.12E-56  | CL_NID2  | TNFAIPB1   | 0.91767838 | 1.25908722 |
| 1.70E-59  | 0.525821292 | 0.441 | 0.118 | 5.98E-55  | CL_NID2  | CHST15     | 0.75859977 | 1.85838539 |
| 9.54E-59  | 0.452132461 | 0.264 | 0.023 | 3.36E-54  | CL_NID2  | KIT        | 0.65228926 | 3.26410744 |
| 2.43E-58  | 0.714665312 | 0.585 | 0.253 | 8.54E-54  | CL_NID2  | CHTRC1     | 1.0310441  | 1.19334389 |
| 1.16E-57  | 0.646485289 | 0.55  | 0.192 | 4.07E-53  | CL_NID2  | ANGPTL2    | 0.93268112 | 1.49429214 |
| 4.32E-52  | 0.709587423 | 0.53  | 0.187 | 1.52E-47  | CL_NID2  | GP1HBP1    | 1.02371826 | 1.47843258 |
| 5.55E-52  | 0.585649907 | 0.567 | 0.266 | 1.95E-47  | CL_NID2  | LKN        | 0.84491422 | 1.0777223  |
| 6.15E-47  | 0.785899323 | 0.723 | 0.294 | 2.18E-42  | CL_NID2  | TNFRSF4    | 1.1375784  | 0.10215103 |
| 1.14E-46  | 0.743682341 | 0.736 | 0.475 | 1.00E-42  | CL_NID2  | MCAM       | 1.07290682 | 0.62643914 |
| 1.22E-46  | 0.45917978  | 0.347 | 0.091 | 4.31E-42  | CL_NID2  | FAM129A    | 0.66245639 | 1.87446912 |
| 4.96E-44  | 0.455732281 | 0.387 | 0.11  | 1.74E-39  | CL_NID2  | HOMER3     | 0.6574827  | 1.76921979 |
| 9.13E-42  | 0.548905258 | 0.679 | 0.418 | 3.21E-37  | CL_NID2  | LAMC1      | 0.79190289 | 0.69333866 |
| 3.89E-40  | 0.771655    | 0.622 | 0.3   | 1.37E-35  | CL_NID2  | ADM        | 1.11326284 | 1.0396562  |
| 6.93E-40  | 0.579205078 | 0.39  | 0.107 | 2.44E-35  | CL_NID2  | ACKR3      | 0.83561629 | 1.81835392 |
| 1.59E-38  | 0.550958099 | 0.178 | 0.018 | 5.60E-34  | CL_NID2  | PRND       | 0.79486452 | 2.99213788 |
| 2.56E-38  | 0.412932734 | 0.341 | 0.1   | 8.99E-34  | CL_NID2  | WFS1       | 0.59573601 | 1.72038271 |
| 5.47E-38  | 0.546526724 | 0.521 | 0.254 | 1.93E-33  | CL_NID2  | SMTN       | 0.78818285 | 1.0221107  |
| 1.11E-37  | 0.49163206  | 0.676 | 0.283 | 3.91E-33  | CL_NID2  | NDS1       | 0.70851634 | 0.1124093  |
| 8.21E-36  | 0.920726047 | 0.453 | 0.208 | 2.89E-31  | CL_NID2  | IGF2       | 1.2328269  | 1.10449417 |
| 5.32E-35  | 0.591488465 | 0.736 | 0.459 | 1.87E-30  | CL_NID2  | MMP2       | 0.85333747 | 0.67534874 |
| 6.84E-35  | 0.673068554 | 0.602 | 0.375 | 2.41E-30  | CL_NID2  | RG53       | 0.97103266 | 0.6756971  |
| 1.15E-34  | 0.464814333 | 0.493 | 0.224 | 4.04E-30  | CL_NID2  | TSPAN15    | 0.67058533 | 1.12079814 |
| 4.73E-34  | 0.552199209 | 0.742 | 0.475 | 1.66E-29  | CL_NID2  | MARCKS     | 0.79665506 | 0.63807384 |
| 1.61E-31  | 0.569190172 | 0.401 | 0.179 | 5.66E-27  | CL_NID2  | SLCAA7     | 0.82116784 | 1.14177396 |
| 1.97E-29  | 0.44229115  | 0.564 | 0.292 | 6.94E-25  | CL_NID2  | ARHGAP18   | 0.63809125 | 0.93796572 |
| 6.22E-29  | 0.476507401 | 0.599 | 0.349 | 2.19E-24  | CL_NID2  | FILIP1     | 0.68745486 | 0.77079919 |
| 1.65E-28  | 0.683983839 | 0.562 | 0.352 | 5.79E-24  | CL_NID2  | CXCR4      | 0.98679009 | 0.66742466 |
| 6.91E-27  | 0.421463643 | 0.567 | 0.314 | 2.43E-23  | CL_NID2  | HJP        | 0.61381428 | 0.84245872 |
| 2.93E-26  | 0.42137675  | 0.516 | 0.286 | 1.03E-21  | CL_NID2  | SMAD1      | 0.61190132 | 0.84026422 |
| 3.04E-25  | 0.445174347 | 0.544 | 0.307 | 1.07E-20  | CL_NID2  | FAM43A     | 0.64225082 | 0.81526012 |
| 1.14E-24  | 0.405871345 | 0.692 | 0.565 | 4.02E-20  | CL_CA4   | TMEM88     | 0.58554858 | 0.29019674 |
| 1.00E-117 | 0.607016872 | 0.771 | 0.623 | 3.53E-113 | CL_CA4   | RGCC       | 0.87574023 | 0.30529209 |
| 4.50E-100 | 0.825398491 | 0.2   | 0.044 | 1.58E-95  | CL_CA4   | CA4        | 1.19079831 | 2.06477026 |
| 1.88E-99  | 0.554741767 | 0.601 | 0.498 | 6.60E-95  | CL_CA4   | ID2        | 0.8003232  | 2.6875939  |
| 1.87E-97  | 0.570135696 | 0.462 | 0.285 | 6.56E-93  | CL_CA4   | CD36       | 0.82225194 | 0.68736965 |
| 2.18E-97  | 0.351539733 | 0.725 | 0.676 | 7.65E-93  | CL_CA4   | PRMT1      | 0.50716463 | 0.10024167 |
| 8.43E-90  | 0.754894257 | 0.587 | 0.536 | 2.97E-85  | CL_CA4   | MTLX       | 1.08906777 | 0.12398858 |
| 1.01E-80  | 0.404809893 | 0.616 | 0.363 | 6.50E-82  | CL_CA4   | SEPP1      | 0.58931349 | 1.1332683  |
| 9.74E-80  | 0.375144262 | 0.837 | 0.737 | 3.43E-81  | CL_CA4   | VAMPS      | 0.54121877 | 0.18240105 |
| 1.58E-84  | 0.399719918 | 0.568 | 0.446 | 5.55E-80  | CL_CA4   | GYPC       | 0.57667394 | 0.34540771 |
| 8.24E-79  | 0.387575752 | 0.669 | 0.583 | 2.90E-74  | CL_CA4   | SGK1       | 0.55915362 | 0.19693244 |
| 1.98E-76  | 0.430631559 | 0.384 | 0.301 | 6.97E-72  | CL_CA4   | Cl1orf96   | 0.62127001 | 0.3462385  |
| 3.48E-75  | 0.758771462 | 0.402 | 0.287 | 1.22E-70  | CL_CA4   | MT1M       | 1.09467582 | 0.47960043 |
| 1.48E-73  | 0.331238224 | 0.826 | 0.745 | 5.21E-69  | CL_CA4   | RAMP3      | 0.47787574 | 0.14795788 |
| 4.22E-70  | 0.327334107 | 0.364 | 0.26  | 1.49E-65  | CL_CA4   | OSBPL1A    | 0.47224329 | 0.47762846 |
| 4.05E-67  | 0.439675396 | 0.643 | 0.611 | 1.42E-62  | CL_CA4   | CD320      | 0.63431751 | 0.07306346 |
| 1.90E-66  | 0.649044931 | 0.519 | 0.475 | 6.66E-62  | CL_CA4   | MT1E       | 0.93637607 | 0.12653241 |
| 1.04E-65  | 0.393496097 | 0.723 | 0.632 | 3.63E-61  | CL_CA4   | ITM2A      | 0.5676948  | 0.15264508 |
| 3.24E-64  | 0.325588047 | 0.582 | 0.466 | 1.14E-59  | CL_CA4   | TNMF18     | 0.46986853 | 0.31763344 |
| 4.37E-64  | 0.816742241 | 0.386 | 0.22  | 1.54E-59  | CL_CA4   | FCN3       | 1.17830998 | 0.79724361 |
| 1.34E-61  | 0.387279178 | 0.182 | 0.067 | 4.70E-57  | CL_CA4   | PRX        | 0.55872575 | 1.37696946 |
| 6.70E-61  | 0.361302748 | 0.497 | 0.399 | 2.35E-56  | CL_CA4   | F2RL3      | 0.52124968 | 0.31333207 |
| 3.68E-52  | 0.601528252 | 0.498 | 0.416 | 1.29E-47  | CL_CA4   | STC1       | 0.86782183 | 0.25673817 |
| 1.55E-48  | 0.424880485 | 0.6   | 0.547 | 5.44E-44  | CL_CA4   | HES1       | 0.61292797 | 0.13226688 |
| 1.77E-10  | 0.380932225 | 0.187 | 0.153 | 6.22E-06  | CL_CA4   | PLPP1      | 0.54956903 | 0.28118175 |
| 0         | 1.836346096 | 0.893 | 0.342 | 0         | CL_CA4   | ACKR1      | 2.64928741 | 1.37177978 |
| 1.63E-292 | 0.987397542 | 0.524 | 0.114 | 5.75E-288 | CA_ACKR1 | C7         | 1.42449911 | 2.15230615 |
| 8.47E-265 | 0.753370751 | 0.567 | 0.129 | 2.98E-260 | CA_ACKR1 |            |            |            |

|           |             |       |       |            |          |           |            |            |
|-----------|-------------|-------|-------|------------|----------|-----------|------------|------------|
| 1.82E-112 | 0.574972438 | 0.391 | 0.185 | 6.41E-108  | C4 ACKR1 | TMEM176B  | 0.82950989 | 1.05950101 |
| 1.48E-95  | 0.71002946  | 0.392 | 0.172 | 5.20E-91   | C4 ACKR1 | PTGDS     | 1.02435598 | 1.16538965 |
| 3.00E-86  | 0.438067143 | 0.453 | 0.215 | 1.06E-81   | C4 ACKR1 | CNKR3     | 0.63199729 | 1.05784407 |
| 3.34E-84  | 0.826268016 | 0.426 | 0.206 | 1.18E-79   | C4 ACKR1 | AKAP12    | 1.19205277 | 1.03044487 |
| 3.93E-74  | 0.507814774 | 0.309 | 0.108 | 1.38E-69   | C4 ACKR1 | VCAM1     | 0.73262186 | 1.47444179 |
| 5.27E-55  | 0.644786248 | 0.24  | 0.083 | 1.85E-50   | C4 ACKR1 | SELE      | 0.93022992 | 1.47720632 |
| 8.02E-50  | 0.62419583  | 0.219 | 0.081 | 2.82E-45   | C4 ACKR1 | OLF       | 0.95421391 | 1.21589374 |
| 4.18E-30  | 0.484274517 | 0.104 | 0.04  | 1.47E-25   | C4 ACKR1 | CSF3      | 0.68866044 | 1.27632123 |
| 4.57E-19  | 0.413509518 | 0.135 | 0.062 | 1.61E-14   | C4 ACKR1 | EFEMP1    | 0.59656813 | 1.06319583 |
| 0         | 1.442011763 | 0.69  | 0.075 | 0          | CS FBLN5 | GIA5      | 2.08038322 | 3.11894107 |
| 0         | 1.439522595 | 0.708 | 0.06  | 0          | CS FBLN5 | FBLN5     | 2.07679211 | 3.45539045 |
| 0         | 1.100438656 | 0.704 | 0.103 | 0          | CS FBLN5 | SEMA3G    | 1.58759739 | 2.71475432 |
| 1.56E-226 | 0.87567591  | 0.683 | 0.292 | 5.50E-222  | CS FBLN5 | NUDT4     | 1.26333329 | 1.21194563 |
| 1.85E-226 | 1.144443104 | 0.722 | 0.222 | 6.50E-222  | CS FBLN5 | GIA4      | 1.65108239 | 1.67926307 |
| 8.09E-244 | 1.4818079   | 0.789 | 0.341 | 2.84E-219  | CS FBLN5 | IGFBP3    | 2.13761353 | 1.19836697 |
| 1.02E-212 | 0.794654213 | 0.729 | 0.289 | 3.60E-208  | CS FBLN5 | ARL15     | 1.14644369 | 1.31996391 |
| 6.48E-203 | 0.927972849 | 0.742 | 0.258 | 2.28E-198  | CS FBLN5 | HEY1      | 1.33878183 | 1.50604544 |
| 2.28E-199 | 0.61496184  | 0.423 | 0.039 | 8.01E-195  | CS FBLN5 | TSPAN2    | 0.8872024  | 3.28203537 |
| 5.79E-198 | 0.985925755 | 0.746 | 0.399 | 2.04E-193  | CS FBLN5 | KCTD12    | 1.4223902  | 0.89457651 |
| 2.43E-194 | 0.90295831  | 0.809 | 0.333 | 8.53E-190  | CS FBLN5 | STMN1     | 1.30269348 | 0.59742262 |
| 1.43E-189 | 0.908383393 | 0.435 | 0.065 | 5.03E-185  | CS FBLN5 | PCS5      | 1.31052022 | 2.65207671 |
| 1.63E-186 | 0.912845685 | 0.51  | 0.134 | 5.73E-182  | CS FBLN5 | LTBP4     | 1.31695794 | 1.88948755 |
| 2.62E-186 | 0.79155617  | 0.821 | 0.452 | 9.22E-182  | CS FBLN5 | EPN2      | 1.15005246 | 0.85394762 |
| 8.85E-169 | 0.564427968 | 0.49  | 0.083 | 3.11E-164  | CS FBLN5 | PLP       | 0.81429743 | 2.4918531  |
| 5.66E-159 | 0.663362671 | 0.729 | 0.444 | 1.99E-154  | CS FBLN5 | PDCD4     | 0.95703004 | 0.70964662 |
| 4.09E-156 | 0.686613142 | 0.738 | 0.445 | 1.44E-151  | CS FBLN5 | OCDAD2    | 0.99057337 | 0.72343721 |
| 6.73E-148 | 1.16314629  | 0.612 | 0.247 | 2.37E-143  | CS FBLN5 | ENPP2     | 1.67806538 | 1.29184676 |
| 2.82E-147 | 0.612571146 | 0.545 | 0.164 | 9.93E-143  | CS FBLN5 | SVN12     | 0.88375336 | 1.70240887 |
| 2.68E-135 | 0.760971068 | 0.317 | 0.052 | 9.41E-131  | CS FBLN5 | SULF1     | 1.09784919 | 2.49802663 |
| 9.35E-133 | 0.60160339  | 0.674 | 0.339 | 3.29E-128  | CS FBLN5 | MECOM     | 0.95241005 | 0.98100301 |
| 5.56E-130 | 0.863719325 | 0.506 | 0.144 | 1.96E-125  | CS FBLN5 | FBLN2     | 1.24608359 | 1.77801096 |
| 4.57E-123 | 0.915097833 | 0.762 | 0.444 | 1.61E-118  | CS FBLN5 | ADAMTS1   | 1.32020711 | 0.77251113 |
| 3.49E-114 | 0.90295831  | 0.673 | 0.299 | 6.23E-110  | CS FBLN5 | OCLL2     | 1.20103881 | 1.5121393  |
| 3.34E-113 | 0.827829421 | 0.322 | 0.061 | 1.17E-108  | CS FBLN5 | SERPINE2  | 1.1943054  | 2.30875271 |
| 6.47E-109 | 0.786683248 | 0.182 | 0.008 | 2.27E-104  | CS FBLN5 | DKK2      | 1.13494402 | 3.84645474 |
| 2.01E-106 | 0.572885309 | 0.477 | 0.153 | 7.06E-102  | CS FBLN5 | VEGFC     | 0.82649879 | 1.60910859 |
| 7.46E-106 | 0.638759212 | 0.505 | 0.176 | 2.62E-101  | CS FBLN5 | PPP1R14A  | 0.92153475 | 1.49450755 |
| 1.99E-103 | 0.609689837 | 0.434 | 0.151 | 7.00E-99   | CS FBLN5 | ELN       | 0.8795965  | 1.49267491 |
| 4.33E-99  | 0.704060039 | 0.582 | 0.324 | 1.52E-94   | CS FBLN5 | JAG1      | 1.01574393 | 0.83527292 |
| 2.62E-94  | 0.435810636 | 0.329 | 0.072 | 9.23E-90   | CS FBLN5 | BMX       | 0.62874184 | 2.1169175  |
| 1.85E-93  | 0.5825975   | 0.613 | 0.293 | 6.49E-89   | CS FBLN5 | DLL4      | 0.84051052 | 1.05229451 |
| 1.42E-91  | 0.584455302 | 0.446 | 0.171 | 4.98E-87   | CS FBLN5 | FILIP1L   | 0.84319077 | 1.357552   |
| 9.46E-90  | 0.585493126 | 0.272 | 0.047 | 3.33E-85   | CS FBLN5 | TMEM100   | 0.84668003 | 2.41330225 |
| 1.42E-87  | 0.499763729 | 0.649 | 0.375 | 5.01E-83   | CS FBLN5 | EMP3      | 0.72100665 | 0.78329124 |
| 1.67E-85  | 0.59529873  | 0.54  | 0.312 | 5.89E-81   | CS FBLN5 | SLC26A2   | 0.84867902 | 0.78177335 |
| 1.65E-84  | 0.476765859 | 0.451 | 0.167 | 5.81E-80   | CS FBLN5 | FBLN1H    | 0.68782774 | 1.40662526 |
| 1.63E-81  | 0.506290928 | 0.421 | 0.14  | 5.74E-77   | CS FBLN5 | SLC14A1   | 0.73042343 | 1.55480053 |
| 4.03E-81  | 0.4227705   | 0.421 | 0.141 | 1.42E-76   | CS FBLN5 | ARHGAP4   | 0.6099289  | 1.5448506  |
| 3.32E-79  | 0.632987329 | 0.505 | 0.181 | 1.17E-74   | CS FBLN5 | IGF2      | 0.91320768 | 1.45519463 |
| 5.33E-84  | 0.5219189   | 0.792 | 0.608 | 1.87E-79   | C6 APLNR | PRCP      | 0.75296981 | 0.37869265 |
| 1.12E-76  | 0.611587711 | 0.559 | 0.338 | 3.93E-72   | C6 APLNR | APLNR     | 0.88233456 | 0.71748659 |
| 4.21E-73  | 0.538102412 | 0.736 | 0.576 | 1.48E-68   | C6 APLNR | PCDH17    | 0.77631768 | 0.35093538 |
| 3.73E-66  | 0.43226026  | 0.805 | 0.725 | 1.31E-61   | C6 APLNR | ZFP36L1   | 0.62361973 | 1.5002544  |
| 1.68E-56  | 0.884080181 | 0.363 | 0.212 | 5.92E-52   | C6 APLNR | IGFBP5    | 1.27545809 | 0.76201072 |
| 1.26E-51  | 0.426558799 | 0.688 | 0.585 | 4.43E-47   | C6 APLNR | TGM2      | 0.61539426 | 0.2321404  |
| 1.95E-48  | 0.36687032  | 0.638 | 0.483 | 6.85E-44   | C6 APLNR | TMEM2     | 0.52928201 | 0.39793759 |
| 2.42E-41  | 0.33363843  | 0.604 | 0.468 | 8.52E-37   | C6 APLNR | RAI14     | 0.48094236 | 0.6624020  |
| 5.04E-40  | 0.35159598  | 0.657 | 0.552 | 1.77E-35   | C6 APLNR | TSH2      | 0.50719369 | 0.24915389 |
| 1.36E-39  | 0.476765859 | 0.451 | 0.167 | 5.81E-35   | C6 APLNR | ENTPD1    | 0.67477812 | 0.29616503 |
| 5.32E-24  | 0.419246011 | 0.696 | 0.611 | 1.87E-19   | C6 APLNR | MT-ND4L   | 0.60484414 | 0.18648409 |
| 4.07E-15  | 0.365774598 | 0.479 | 0.368 | 1.43E-10   | C6 APLNR | ICAM1     | 0.5277012  | 0.37583142 |
| 3.91E-08  | 0.678724188 | 0.213 | 0.17  | 0.00137517 | C6 APLNR | MTRNR2L12 | 0.97919202 | 0.31697321 |
| 1.97E-07  | 0.400166433 | 0.18  | 0.138 | 0.00691432 | C6 APLNR | MT-ATP8   | 0.57731813 | 0.37151012 |
| 3.38E-156 | 0.971215363 | 0.925 | 0.567 | 1.19E-151  | C7 SSU42 | GLUL      | 1.40116759 | 0.70121557 |
| 3.28E-132 | 0.904751418 | 0.471 | 0.042 | 1.15E-127  | C7 SSU42 | SSU42     | 1.30528038 | 3.34022891 |
| 1.57E-115 | 1.194482251 | 0.826 | 0.312 | 5.52E-111  | C7 SSU42 | OCLL2     | 1.72327362 | 1.39036564 |
| 4.90E-106 | 1.513357554 | 0.753 | 0.324 | 1.72E-101  | C7 SSU42 | FABP4     | 2.20928195 | 1.20411026 |
| 4.70E-85  | 0.831845823 | 0.654 | 0.206 | 1.65E-80   | C7 SSU42 | SLC6A6    | 1.20009984 | 1.64303547 |
| 3.05E-83  | 0.872465825 | 0.601 | 0.183 | 1.07E-78   | C7 SSU42 | ADAMTS6   | 1.25870212 | 1.68858513 |
| 4.70E-80  | 0.816321408 | 0.736 | 0.252 | 1.65E-75   | C7 SSU42 | GJAM      | 1.17770285 | 1.52770518 |
| 1.89E-79  | 0.61496184  | 0.731 | 0.265 | 6.65E-75   | C7 SSU42 | AIF1L     | 0.88172521 | 1.44674686 |
| 1.76E-77  | 0.648429004 | 0.665 | 0.253 | 1.97E-72   | C7 SSU42 | CLDN15    | 0.93548531 | 1.37679583 |
| 7.26E-74  | 0.973561527 | 0.879 | 0.574 | 2.55E-69   | C7 SSU42 | RBP7      | 1.40455239 | 0.61048302 |
| 6.39E-65  | 0.559176539 | 0.795 | 0.368 | 2.25E-60   | C7 SSU42 | BTNL9     | 0.80672122 | 1.10082437 |
| 4.16E-60  | 0.522662291 | 0.707 | 0.321 | 1.46E-55   | C7 SSU42 | EPN1      | 0.7540423  | 1.12700528 |
| 7.63E-57  | 0.437926531 | 0.269 | 0.029 | 2.68E-52   | C7 SSU42 | TMEM178A  | 0.63179443 | 3.01056924 |
| 2.70E-55  | 0.817217254 | 0.573 | 0.197 | 9.50E-51   | C7 SSU42 | IGF2      | 1.17899528 | 1.5167142  |
| 3.47E-49  | 0.529625336 | 0.789 | 0.508 | 1.22E-44   | C7 SSU42 | PLS3      | 0.76408785 | 0.63018018 |
| 4.36E-48  | 0.541338972 | 0.681 | 0.292 | 1.53E-43   | C7 SSU42 | HEY1      | 0.78098705 | 1.20774565 |
| 5.16E-47  | 0.514015622 | 0.628 | 0.28  | 1.81E-42   | C7 SSU42 | ASRGL1    | 0.74156779 | 1.15124358 |
| 7.13E-47  | 0.588681064 | 0.52  | 0.208 | 2.51E-42   | C7 SSU42 | ATP13A3   | 0.84928725 | 1.30146399 |
| 1.26E-36  | 0.456391797 | 0.744 | 0.415 | 4.42E-32   | C7 SSU42 | ASS1      | 0.65843418 | 0.83457639 |
| 1.30E-36  | 0.423136093 | 0.458 | 0.179 | 4.56E-32   | C7 SSU42 | PPY       | 0.61045634 | 1.33130643 |
| 1.78E-35  | 0.436678448 | 0.802 | 0.506 | 6.27E-31   | C7 SSU42 | UACA      | 0.62999383 | 0.65924538 |
| 2.50E-35  | 0.429894943 | 0.727 | 0.509 | 8.78E-31   | C7 SSU42 | MAST4     | 0.71087216 | 0.64183388 |
| 3.52E-28  | 0.50948056  | 0.711 | 0.397 | 1.24E-23   | C7 SSU42 | GPR116    | 0.73440111 | 0.83276409 |
| 8.89E-28  | 0.442580376 | 0.434 | 0.161 | 3.13E-23   | C7 SSU42 | ALPL      | 0.63850851 | 1.4030377  |
| 1.34E-27  | 0.496186393 | 0.463 | 0.199 | 4.72E-23   | C7 SSU42 | PPP1R14A  | 0.71584565 | 1.19793938 |
| 3.80E-24  | 0.444216183 | 0.637 | 0.329 | 1.34E-19   | C7 SSU42 | CRIP1     | 0.64086848 | 0.94272519 |
| 5.53E-23  | 0.433588548 | 0.615 | 0.307 | 1.95E-18   | C7 SSU42 | IGL5      | 0.62553605 | 0.99072219 |
| 6.47E-17  | 0.515877827 | 0.696 | 0.46  | 2.28E-12   | C7 SSU42 | RCAN1     | 0.74425438 | 0.59218373 |
| 3.33E-228 | 4.842770513 | 0.874 | 0.103 | 1.17E-223  | C8 PROX1 | CCL21     | 6.986641   | 3.02483185 |
| 6.02E-135 | 2.301967455 | 0.825 | 0.27  | 2.12E-130  | C8 PROX1 | TFF3      | 3.32103703 | 1.59367972 |
| 8.38E-92  | 1.699831067 | 0.602 | 0.012 | 2.95E-87   | C8 PROX1 | PDPN      | 2.45233785 | 5.15808987 |
| 3.78E-76  | 1.600600652 | 0.883 | 0.499 | 1.33E-71   | C8 PROX1 | TFPI      | 2.30917862 | 0.81715934 |
| 9.89E-70  | 1.333049876 | 0.544 | 0.296 | 3.48E-65   | C8 PROX1 | RBP1      | 1.92318445 | 0.86704266 |
| 1.87E-67  | 1.333049876 | 0.544 | 0.296 | 3.48E-65   | C8 PROX1 | PROX1     | 1.90879623 | 3.58769223 |
| 1.23E-58  | 0.999248136 | 0.359 | 0.003 | 4.34E-54   | C8 PROX1 | RELN      | 1.44161093 | 5.50779595 |
| 2.51E-57  | 1.052830023 | 0.427 | 0.016 | 8.82E-53   | C8 PROX1 | IGF1      | 1.51891265 | 4.36257008 |
| 1.92E-56  | 1.638117797 | 0.738 | 0.162 | 6.76E-52   | C8 PROX1 | MMRN1     | 2.36330442 | 2.15351411 |
| 1.46E-53  | 1.101210429 | 0.631 | 0.322 | 5.14E-49   | C8 PROX1 | LAPTM5    | 1.58871082 | 0.95973613 |
| 2.50E-49  | 0.880249274 | 0.194 | 0.051 | 8.80E-45   | C8 PROX1 | MFAP4     | 1.26993126 | 1.8292697  |
| 4.29E-49  | 0.854422078 | 0.427 | 0.029 | 1.51E-44   | C8 PROX1 | SEMA3A    | 1.23267049 | 3.66742466 |
| 5.17E-48  | 2.21045301  | 0.524 | 0.071 | 1.82E-43   | C8 PROX1 | EFEMP1    | 3.20429104 | 2.7991964  |
| 2.53E-46  | 1.076794565 | 0.748 | 0.458 | 8.90E-42   | C8 PROX1 | PPFIBP1   | 1.55348618 | 0.70163767 |
| 1.66E-45  | 0.922705559 | 0.379 | 0.013 | 5.84E-41   | C8 PROX1 | TBX1      | 1.33118273 | 4.4150375  |
| 7.68E-41  | 0.422888411 | 0.252 | 0.002 | 2.70E-36   | C8 PROX1 | ACKR2     | 0.61009901 | 5.19826963 |
| 8.69E-41  | 0.970324452 | 0.398 | 0.024 | 3.06E-36   | C8 PROX1 | MRC1      | 1.3998822  |            |
